# Supplementary material for: A pan-cancer analysis of anti-proliferative protein family genes for therapeutic targets in cancer
Source: Sci Rep. 2023 Dec 7;13:21607. doi: 10.1038/s41598-023-48961-1 (PMC10703880; doi:10.1038/s41598-023-48961-1)
Supplement: Supplementary file 5 — Supplementary Table 4. [file 41598_2023_48961_MOESM5_ESM.xlsx]

## Sheet: TOB1
Rank	Score	Type	ID	Name	Description	CMap Class	Target	MOA
12	99.93	cp	BRD-K06817181	BRD-K06817181	JAK inhibitor		JAK2	JAK inhibitor
13	99.93	cp	BRD-K61829047	7b-cis	Exportin antagonist		XPO1	Exportin antagonist
43	99.86	cp	BRD-A17819071	gedunin	HSP inhibitor		HSP90AA1	HSP inhibitor
49	99.79	cp	BRD-K78294846	osthol	Calcium channel blocker			Calcium channel blocker
58	99.75	cp	BRD-K29733039	deforolimus	MTOR inhibitor		MTOR	MTOR inhibitor
59	99.75	cp	BRD-K68143200	SA-792541	CDC inhibitor		CASP3, CDC25A, CDC25B	CDC inhibitor
64	99.72	cp	BRD-K83837640	JNJ-26854165	HDAC inhibitor		HDAC1, HDAC10, HDAC11, HDAC2, HDAC3, HDAC4, HDAC5, HDAC6, HDAC7, HDAC8, HDAC9, MDM2	HDAC inhibitor
71	99.68	cp	BRD-K68873215	phosphodiesterase-V-inhibitor-II	Phosphodiesterase inhibitor		PDE5A	Phosphodiesterase inhibitor
72	99.68	cp	BRD-A36318220	necrostatin-1	RIPK inhibitor		IDO1, KRR1, RIPK1	RIPK inhibitor
77	99.68	cp	BRD-K63630713	etacrynic-acid	Sodium/potassium/chloride transporter inhibitor		SLC12A1, ATP1A1, SLC12A2	Sodium/potassium/chloride transporter inhibitor
81	99.65	cp	BRD-K60476892	YC-1	Guanylyl cyclase activator		HIF1A, GUCY1A2, GUCY1A3, GUCY1B3	Guanylyl cyclase activator
85	99.58	cp	BRD-A75935363	atracurium	Acetylcholine receptor antagonist		CHRNA2	Acetylcholine receptor antagonist
91	99.54	cp	BRD-K91145395	prostratin	PKC activator		PRKCA, PRKCB, PRKCD, PRKCE, PRKCG, PRKCH, PRKCQ	PKC activator
96	99.51	cp	BRD-K80431395	triciribine	AKT inhibitor		AKT1, AKT2, AKT3	AKT inhibitor
97	99.51	cp	BRD-K77908580	entinostat	HDAC inhibitor		HDAC1, HDAC2, HDAC3, HDAC9	HDAC inhibitor
102	99.47	cp	BRD-K95785537	PP-2	SRC inhibitor		SRC, LCK, ABL1, LYN, RIPK2	SRC inhibitor
103	99.47	cp	BRD-A73741725	exemestane	Aromatase inhibitor		CYP19A1	Aromatase inhibitor
112	99.37	cp	BRD-A49172652	lansoprazole	ATPase inhibitor		ATP4A, CYP2C19, CYP3A4, CYP3A5	ATPase inhibitor
113	99.37	cp	BRD-K50311478	tosyl-phenylalanyl-chloromethyl-ketone	Chymotrypsin inhibitor			Chymotrypsin inhibitor
119	99.33	cp	BRD-A15079084	phorbol-12-myristate-13-acetate	PKC activator		CD4, KCNT2, PRKCA, TRPV4	PKC activator
120	99.32	cp	BRD-K35128472	2-aminopurine	Serine/threonine kinase inhibitor			Serine/threonine kinase inhibitor
130	99.26	cp	BRD-A52650764	ingenol	PKC activator		PRKCD, PRKCE	PKC activator
131	99.26	cp	BRD-K34092021	arvanil	TRPV agonist		CNR1, TRPV1	TRPV agonist
134	99.26	cp	BRD-K78126613	menadione	Mitochondrial DNA polymerase inhibitor		AOX1, BGLAP, F10, F2, F7, F9, GGCX, NQO1, NQO2, PKM, PROC, PROS1, PROZ, VKORC1, VKORC1L1	Mitochondrial DNA polymerase inhibitor, Phosphatase inhibitor
140	99.22	cp	BRD-K92428153	mycophenolate-mofetil	Dehydrogenase inhibitor		IMPDH1, IMPDH2, HCAR2	Dehydrogenase inhibitor, Hydroxycarboxylic acid receptor agonist, Immunosuppressant, Inosine monophosphate dehydrogenase inhibitor, Inositol monophosphatase inhibitor
141	99.22	cp	BRD-K51290057	SA-792709	Retinoid receptor agonist		RARA, RARB	Retinoid receptor agonist
144	99.2	cp	BRD-K26241953	piceatannol	SYK inhibitor		ATP5A1, ATP5B, ATP5C1, IRF3, PTGS2, SIRT1, SYK, TYR	SYK inhibitor
146	99.19	cp	BRD-K65814004	diphenyleneiodonium	Nitric oxide synthase inhibitor		ALDH1A2, ALDH2, ALDH5A1, ALDH7A1, NOX3, XDH	Nitric oxide synthase inhibitor
147	99.19	cp	BRD-A43150328	penicillic-acid	other antibiotic			other antibiotic
148	99.19	cp	BRD-K31542390	mycophenolic-acid	Dehydrogenase inhibitor		IMPDH1, IMPDH2	Dehydrogenase inhibitor, Inositol monophosphatase inhibitor
150	99.15	cp	BRD-A59808129	guggulsterone	Cholesterol inhibitor		NR1H4, PGR, AR, ESR1, IKBKB, NR1I2, NR3C1, NR3C2	Cholesterol inhibitor, Estrogen receptor agonist, FXR antagonist, IKK inhibitor, Pregnane X receptor agonist, Progesterone receptor agonist
153	99.12	cp	BRD-K36198571	WAY-170523	Metalloproteinase inhibitor		MMP13	Metalloproteinase inhibitor
154	99.12	cp	BRD-A56020723	CA-074-Me	Cathepsin inhibitor		CTSB	Cathepsin inhibitor
155	99.12	cp	BRD-K91601245	mercaptopurine	Immunosuppressant		HPRT1, IMPDH1, IMPDH2, PPAT	Immunosuppressant, Protein synthesis inhibitor, Purine antagonist
159	99.08	cp	BRD-K25311561	KU-55933	ATM kinase inhibitor		ATM, PRKDC	ATM kinase inhibitor
162	99.01	cp	BRD-K81916719	triclabendazole	Microtubule inhibitor		DNMT1	Microtubule inhibitor
167	98.99	cp	BRD-K57011718	UK-356618	Metalloproteinase inhibitor		MMP3, MMP13, MMP14, MMP2, MMP9	Metalloproteinase inhibitor
168	98.98	cp	BRD-K60219430	serdemetan	MDM inhibitor		MDM2	MDM inhibitor
169	98.98	cp	BRD-K86727142	embelin	HCV inhibitor		XIAP	HCV inhibitor, XIAP inhibitor
170	98.98	cp	BRD-K89839824	raltitrexed	Thymidylate synthase inhibitor		TYMS, FPGS	Thymidylate synthase inhibitor
171	98.98	cp	BRD-K25504083	cytochalasin-d	Actin polymerization inhibitor		ACTB	Actin polymerization inhibitor
174	98.96	cp	BRD-K84895041	BMY-45778	IP1 prostacyclin receptor agonist		PTGIR	IP1 prostacyclin receptor agonist
177	98.94	cp	BRD-A92537424	danazol	Estrogen receptor antagonist		ESR1, GNRHR, AR, CCL2, CYP2C8, GNRHR2, PGR, TNF	Estrogen receptor antagonist, Progesterone receptor agonist
180	98.91	cp	BRD-K26664453	cytochalasin-b	Microtubule inhibitor		ACTB	Microtubule inhibitor
192	98.78	cp	BRD-K52313696	tacedinaline	HDAC inhibitor		HDAC1	HDAC inhibitor
193	98.77	cp	BRD-K97309399	thiothixene	Dopamine receptor antagonist		HTR2A, DRD1, DRD2, HRH1	Dopamine receptor antagonist
195	98.77	cp	BRD-K88868628	iodoacetic-acid	Cysteine peptidase inhibitor			Cysteine peptidase inhibitor
196	98.77	cp	BRD-K93034159	cladribine	Adenosine deaminase inhibitor		ADA, PNP, POLA1, POLE, POLE2, POLE3, POLE4, RRM1, RRM2, RRM2B	Adenosine deaminase inhibitor, Ribonucleoside reductase inhibitor
202	98.7	cp	BRD-K33583600	isoliquiritigenin	Guanylate cyclase activator		AKR1B1, HRH2, SIRT1	Guanylate cyclase activator
205	98.68	cp	BRD-K06198550	isorotenone	Mitochondrial complex I inhibitor		MT-ND1	Mitochondrial complex I inhibitor, NADH-ubiquinone oxidoreductase (Complex I) inhibitor
206	98.66	cp	BRD-K83289131	CAY-10618	NAMPT inhibitor		NAMPT	NAMPT inhibitor
208	98.63	cp	BRD-K08547377	irinotecan	Topoisomerase inhibitor		TOP1, CYP3A5, TOP1MT	Topoisomerase inhibitor
213	98.56	cp	BRD-A82371568	clofarabine	Ribonucleoside reductase inhibitor		RRM1, POLA1, RRM2, SLC22A8	Ribonucleoside reductase inhibitor
222	98.41	cp	BRD-K03557653	sappanone-a	Tyrosinase inhibitor			Tyrosinase inhibitor, Melanin inhibitor
224	98.36	cp	BRD-K39520573	GW-5074	Leucine rich repeat kinase inhibitor		LRRK1, LRRK2, NTRK1, RAF1	Leucine rich repeat kinase inhibitor, RAF inhibitor
226	98.34	cp	BRD-K21350491	phenamil	TRPV antagonist		PKD2L1	TRPV antagonist
227	98.33	cp	BRD-K15108141	gemcitabine	Ribonucleotide reductase inhibitor		RRM1, CMPK1, RRM2, TYMS	Ribonucleotide reductase inhibitor
228	98.31	cp	BRD-A94413429	NTNCB	Neuropeptide receptor antagonist		NPY5R	Neuropeptide receptor antagonist
230	98.29	cp	BRD-K29359156	ebselen	H+/K+-ATPase inhibitor		ALB, LTB4R, NOX3	H+/K+-ATPase inhibitor, Cyclooxygenase inhibitor, Glutathione peroxidase agonist, Nitric oxide synthase inhibitor
234	98.2	cp	BRD-A81772229	simvastatin	HMGCR inhibitor		HMGCR, CYP2C8, CYP3A4, CYP3A5, ITGB2	HMGCR inhibitor
235	98.2	cp	BRD-A80638690	floxuridine	DNA synthesis inhibitor		TYMS	DNA synthesis inhibitor
236	98.2	cp	BRD-K12994359	valdecoxib	Cyclooxygenase inhibitor		PTGS2, CA12, CYP2C19	Cyclooxygenase inhibitor
237	98.2	cp	BRD-K20755323	SA-792728	Sphingosine kinase inhibitor		SPHK1, VCP	Sphingosine kinase inhibitor
238	98.18	cp	BRD-K92991072	PAC-1	Caspase activator		CASP3	Caspase activator
243	98.11	cp	BRD-K14200658	syrosingopine	Vesicular monoamine transporter inhibitor		SLC18A2, SLC18A1	Vesicular monoamine transporter inhibitor
249	97.99	cp	BRD-A58955223	sulforaphane	Antineoplastic		NFE2L2	Antineoplastic, Aryl hydrocarbon receptor antagonist
255	97.89	cp	BRD-K77133231	PD-169316	p38 MAPK inhibitor		ALOX5	p38 MAPK inhibitor
256	97.89	cp	BRD-K70577657	H-9	PKA inhibitor		PRKACA	PKA inhibitor
260	97.82	cp	BRD-K78431006	crizotinib	ALK inhibitor		ALK, MET, CYP2B6, CYP3A5, MST1R, ROS1	ALK inhibitor
261	97.82	cp	BRD-K02526760	QS-11	ARFGAP inhibitor		ARFGAP1	ARFGAP inhibitor
267	97.73	cp	BRD-K19309090	SR-95639A	Acetylcholine receptor agonist		CHRM1	Acetylcholine receptor agonist
270	97.71	cp	BRD-K83963101	MLN-8054	Aurora kinase inhibitor		AURKA	Aurora kinase inhibitor, Mitotic inhibitor, Protein kinase inhibitor
273	97.68	cp	BRD-K30296925	flavokavain-b	Antineoplastic		HIF1A	Antineoplastic
275	97.62	cp	BRD-U44700465	HG-5-88-01	Protein kinase inhibitor		ADCK4, EGFR	Protein kinase inhibitor
277	97.6	cp	BRD-K13049116	BMS-754807	IGF-1 inhibitor		IGF1R, AKT1	IGF-1 inhibitor
281	97.53	cp	BRD-K43887077	dopamine	Dopamine receptor agonist		DRD2, DRD1, DRD3, DRD4, DRD5, DBH, HTR1A, HTR7, SLC6A2, SLC6A3, SLC6A4	Dopamine receptor agonist
284	97.47	cp	BRD-K35687265	ON-01910	PLK inhibitor		CDK1, FLT1, FYN, MCL1, PDGFRA, PLK1, PLK2, SRC	PLK inhibitor
286	97.43	cp	BRD-A15010982	HU-211	Glutamate receptor antagonist		CNR1, CNR2, GLRA1, GLRA2, GLRA3, GPR55, GRIN1, NFKB1	Glutamate receptor antagonist
289	97.36	cp	BRD-A62025033	temsirolimus	MTOR inhibitor		MTOR, PTEN	MTOR inhibitor
290	97.36	cp	BRD-K29950728	clomifene	Estrogen receptor antagonist		ESR1, AR	Estrogen receptor antagonist
295	97.29	cp	BRD-K72895815	SSR-69071	Leukocyte elastase inhibitor		ELANE	Leukocyte elastase inhibitor
300	97.21	cp	BRD-K07403598	CAY-10470	NFkB pathway inhibitor		NFKB1, TNF	NFkB pathway inhibitor
303	97.16	cp	BRD-K07265709	razoxane	Chelating agent		TOP2A, TOP2B	Chelating agent, Topoisomerase inhibitor
304	97.11	cp	BRD-K02113016	olaparib	PARP inhibitor		PARP1, PARP2, PARP3	PARP inhibitor
305	97.11	cp	BRD-K67439147	SIB-1893	Glutamate receptor antagonist		GRM5, GRM4	Glutamate receptor antagonist
306	97.08	cp	BRD-K43978949	PIT	Purinergic receptor antagonist		P2RY1	Purinergic receptor antagonist
308	97	cp	BRD-K20986251	lithocholic-acid	FXR antagonist		NR1I2, VDR, GPBAR1, MDM2, MDM4, NR1H4, PTPN1	FXR antagonist, MDM inhibitor, PXR ligand, Tyrosine phosphatase inhibitor, Vitamin D receptor agonist, Vitamin D receptor ligand
309	97	cp	BRD-K51730347	diphencyprone	Immunostimulant			Immunostimulant
313	96.92	cp	BRD-K22096725	ALW-II-49-7	Ephrin inhibitor		DDR1, EPHA2, EPHA4, EPHA7, EPHB2, EPHB4, EPHB6	Ephrin inhibitor
315	96.9	cp	BRD-K12762134	XAV-939	Tankyrase inhibitor		TNKS, TNKS2	Tankyrase inhibitor
316	96.86	cp	BRD-K17743697	KB-R7943	Sodium/calcium exchange inhibitor		SLC8A1, TRPC3, TRPC5, TRPC6	Sodium/calcium exchange inhibitor
317	96.86	cp	BRD-K79092138	nitrofural	Bacterial DNA inhibitor			Bacterial DNA inhibitor
318	96.84	cp	BRD-K59456551	methotrexate	Dihydrofolate reductase inhibitor		DHFR, AOX1, FOLR1, TYMS	Dihydrofolate reductase inhibitor
321	96.81	cp	BRD-A48237631	mitomycin-c	DNA alkylating agent			DNA alkylating agent, DNA inhibitor, DNA synthesis inhibitor
324	96.74	cp	BRD-K66792149	quinoclamine	Algicide			Algicide
334	96.55	cp	BRD-A94543220	bifonazole	Sterol demethylase inhibitor		CYP2B6	Sterol demethylase inhibitor
336	96.51	cp	BRD-A52660433	tetrindole	Monoamine oxidase inhibitor		MAOA	Monoamine oxidase inhibitor
338	96.49	cp	BRD-K71430621	clobenpropit	Histamine receptor antagonist		HRH3, HRH4, HRH1, HRH2	Histamine receptor antagonist
347	96.37	cp	BRD-K03319035	maprotiline	Norepinephrine reuptake inhibitor		SLC6A2, ADRA1A, ADRA1B, ADRA1D, ADRA2A, ADRA2B, ADRA2C, CHRM1, CHRM2, CHRM3, CHRM4, CHRM5, DRD2, HRH1, HTR2A, HTR2C, HTR7	Norepinephrine reuptake inhibitor, Tricyclic antidepressant
348	96.36	cp	BRD-K75295174	alisertib	Aurora kinase inhibitor		AURKA	Aurora kinase inhibitor
351	96.31	cp	BRD-K99616396	motesanib	KIT inhibitor		FLT1, FLT4, KDR, KIT, PDGFRA, RET	KIT inhibitor, PDGFR receptor inhibitor, VEGFR inhibitor
354	96.28	cp	BRD-K11630072	carmofur	Thymidylate synthase inhibitor		TYMS	Thymidylate synthase inhibitor
356	96.27	cp	BRD-K39111395	BCL2-inhibitor	BCL inhibitor		BCL2	BCL inhibitor
357	96.26	cp	BRD-K32795028	1-benzylimidazole	Thromboxane synthase inhibitor		CYP11B1, QPCT	Thromboxane synthase inhibitor
358	96.26	cp	BRD-K30677119	PP-30	RAF inhibitor		RAF1	RAF inhibitor
359	96.23	cp	BRD-K10705233	GW-405833	Cannabinoid receptor agonist		CNR2	Cannabinoid receptor agonist
364	96.13	cp	BRD-K72703948	ZM-447439	Aurora kinase inhibitor		AURKA, AURKB	Aurora kinase inhibitor
365	96.12	cp	BRD-K56700933	phenethyl-isothiocyanate	Antineoplastic		CYP2E1	Antineoplastic
367	96.1	cp	BRD-K73395020	SA-1478088	-666		MMP12, MMP14, MMP2, MMP8, MMP9	-666
373	96.03	cp	BRD-K70487031	flupentixol	Dopamine receptor antagonist		DRD2, DRD1, ADRA1A, CHRM1, DRD3, DRD5, HTR2A	Dopamine receptor antagonist
379	95.87	cp	BRD-K01292756	pimozide	Dopamine receptor antagonist		DRD2, DRD3, CACNA1I, CALM1, HRH1, HTR1A, HTR2A, KCNA10, KCNH2	Dopamine receptor antagonist
380	95.84	cp	BRD-A16311756	profenamine	Butyrylcholinesterase inhibitor		CHRM1, BCHE, CHRM2, GRIN3A	Butyrylcholinesterase inhibitor, Cholinergic receptor antagonist
388	95.75	cp	BRD-A18579359	wiskostatin	Neural Wiskott-Aldrich syndrome protein inhibitor		WAS, WASL	Neural Wiskott-Aldrich syndrome protein inhibitor
389	95.75	cp	BRD-K32821942	azathioprine	Dehydrogenase inhibitor		HPRT1, IMPDH1, PPAT	Dehydrogenase inhibitor
397	95.7	cp	BRD-K11911061	GR-127935	Serotonin receptor antagonist		HTR1B, HTR1D, HTR1A, HTR2A, HTR2C, HTR1E, HTR1F, HTR2B, HTR6	Serotonin receptor antagonist
398	95.7	cp	BRD-K05396879	15-delta-prostaglandin-j2	PPAR receptor agonist		PPARG, NR1H4	PPAR receptor agonist
401	95.67	cp	BRD-A52282606	lacidipine	Calcium channel blocker		CACNA1C	Calcium channel blocker
402	95.67	cp	BRD-K62221994	T-98475	Gonadotropin releasing factor hormone receptor antagonist		GNRH1, GNRHR	Gonadotropin releasing factor hormone receptor antagonist
407	95.6	cp	BRD-A36630025	SN-38	Topoisomerase inhibitor		TOP1	Topoisomerase inhibitor
408	95.6	cp	BRD-K36737713	AG-957	Protein tyrosine kinase inhibitor		ABL1, EGFR	Protein tyrosine kinase inhibitor
409	95.6	cp	BRD-K07303502	arachidonyl-trifluoro-methane	Cytosolic phospholipase inhibitor		PLA2G4A	Cytosolic phospholipase inhibitor
410	95.59	cp	BRD-K28168037	fenretinide	Apoptosis stimulant		CYP2C8, CYP3A5, RARA, RARG	Apoptosis stimulant, Retinoid receptor agonist
411	95.59	cp	BRD-K17896185	FIT	Opioid receptor agonist		OPRD1	Opioid receptor agonist
414	95.56	cp	BRD-A45333398	periplocymarin	Apoptosis stimulant			Apoptosis stimulant
417	95.53	cp	BRD-K66766661	17-beta-estradiol	Estrogen receptor agonist		ESR1	Estrogen receptor agonist
418	95.53	cp	BRD-A26032986	zaldaride	Calmodulin antagonist		CALM1	Calmodulin antagonist
420	95.52	cp	BRD-K98548675	parthenolide	NFkB pathway inhibitor		ADIPOR2, IKBKB, RELA	NFkB pathway inhibitor, Adiponectin receptor agonist
422	95.51	cp	BRD-K51918615	iodophenpropit	Histamine receptor antagonist		HRH3, HRH4, GRIN2B	Histamine receptor antagonist
424	95.46	cp	BRD-A81795050	U-18666A	Oxidosqualene cyclase inhibitor			Oxidosqualene cyclase inhibitor
430	95.27	cp	BRD-K59962020	CHEMBL-374350	NFkB pathway inhibitor			NFkB pathway inhibitor
431	95.27	cp	BRD-K09859624	methantheline	Acetylcholine receptor antagonist		CHRM1, HRH2	Acetylcholine receptor antagonist
432	95.25	cp	BRD-K28143534	cyproheptadine	Histamine receptor antagonist		HRH1, ADRA1A, ADRA1B, ADRA1D, CHRM1, CHRM2, CHRM3, HTR2A, HTR2B, HTR2C, HTR6, HTR7	Histamine receptor antagonist
433	95.19	cp	BRD-K88741031	methyl-2,5-dihydroxycinnamate	EGFR inhibitor		EGFR	EGFR inhibitor, Tyrosine kinase inhibitor
434	95.19	cp	BRD-K05673000	dicloxacillin	Bacterial cell wall synthesis inhibitor			Bacterial cell wall synthesis inhibitor
438	95.14	cp	BRD-K59058766	chlorprothixene	Dopamine receptor antagonist		DRD2, CHRM1, CHRM2, CHRM3, CHRM4, CHRM5, DRD1, DRD3, HRH1, HTR2A, HTR2B, HTR2C	Dopamine receptor antagonist
439	95.14	cp	BRD-A32161980	carbetocin	Oxytocin receptor agonist		OXTR	Oxytocin receptor agonist
442	95.1	cp	BRD-K73293050	WZ-3146	EGFR inhibitor		EGFR	EGFR inhibitor
445	95.05	cp	BRD-K05151076	ZK-164015	Estrogen receptor antagonist		ESR1, ESR2	Estrogen receptor antagonist
446	95.03	cp	BRD-K03109492	NSC-663284	CDC inhibitor		CDC25A, CDC25B, CDC25C	CDC inhibitor
449	94.89	cp	BRD-K96471533	nitazoxanide	Pyruvate ferredoxin oxidoreductase inhibitor			Pyruvate ferredoxin oxidoreductase inhibitor
460	94.6	cp	BRD-K11558771	droxinostat	HDAC inhibitor		HDAC6, HDAC8	HDAC inhibitor
462	94.55	cp	BRD-A22713669	BVT-948	Tyrosine phosphatase inhibitor		PTPN1, PTPN11, PTPN2	Tyrosine phosphatase inhibitor
468	94.46	cp	BRD-K95901403	XL-147	PI3K inhibitor		PIK3CA, PIK3CD, PIK3CG	PI3K inhibitor
470	94.4	cp	BRD-K82135108	elesclomol	Oxidative stress inducer		TOP2A	Oxidative stress inducer
471	94.35	cp	BRD-K74402642	NSC-632839	Ubiquitin specific protease inhibitor		USP2, USP7, SENP2, USP1	Ubiquitin specific protease inhibitor
474	94.26	cp	BRD-K09549677	mibefradil	T-type calcium channel blocker		CACNA1G, CACNA1H, CACNA1C, CACNA1I, ANO1, CACNA1D, CACNA1F, CACNA1S, CACNB1, CACNB2, CACNB3, CACNB4, CATSPER1, CATSPER2, CATSPER3, CATSPER4, CYP3A5, CYP3A7, SCN2A, SCN4A, SCN5A, SCN9A	T-type calcium channel blocker
478	94.17	cp	BRD-K67844266	MLN-4924	Nedd activating enzyme inhibitor		NAE1, UBA3	Nedd activating enzyme inhibitor
480	94.1	cp	BRD-K24681473	YM-155	Survivin inhibitor		BIRC5	Survivin inhibitor
484	93.97	cp	BRD-K43330982	JTE-013	Lysophospholipid receptor antagonist		S1PR2, P2RY10	Lysophospholipid receptor antagonist
491	93.87	cp	BRD-A47144777	dihydro-7-desacetyldeoxygedunin	HSP inhibitor		HSP90AA1	HSP inhibitor
492	93.84	cp	BRD-K04210847	tamoxifen	Estrogen receptor antagonist		ESR1, ESR2, CYP3A5, EBP, GPER1, PRKCA, PRKCB, PRKCD, PRKCE, PRKCG, PRKCI, PRKCQ, PRKCZ	Estrogen receptor antagonist, Selective estrogen receptor modulator (SERM)
495	93.82	cp	BRD-K00317371	RITA	MDM inhibitor		MDM2, TXNRD1, TXNRD2	MDM inhibitor
496	93.81	cp	BRD-K87510569	RS-504393	CC chemokine receptor antagonist		CCR2, CCL2	CC chemokine receptor antagonist
502	93.67	cp	BRD-K47659338	EMD-386088	Serotonin receptor agonist		HTR6	Serotonin receptor agonist
506	93.62	cp	BRD-K74733595	APHA-compound-8	HDAC inhibitor		HDAC8	HDAC inhibitor
507	93.62	cp	BRD-A31801025	formestane	Aromatase inhibitor		CYP19A1	Aromatase inhibitor
519	93.4	cp	BRD-K67566344	KU-0063794	MTOR inhibitor		MTOR	MTOR inhibitor
520	93.35	cp	BRD-A18043272	phensuximide	Succinimide antiepileptic			Succinimide antiepileptic
523	93.29	cp	BRD-K09416995	lovastatin	HMGCR inhibitor		HMGCR, CYP3A5, HDAC2, ITGAL, NR1I2	HMGCR inhibitor
524	93.28	cp	BRD-K85015012	NNC-05-2090	GAT inhibitor		SLC6A11, SLC6A12, SLC6A13	GAT inhibitor, GABA uptake inhibitor
525	93.27	cp	BRD-A48570745	ivermectin	GABA receptor agonist		CHRNA7, GABRB3, GLRA3, P2RX7	GABA receptor agonist
530	93.22	cp	BRD-K27737647	H-89	PKA inhibitor		PRKACA, GSG2, KCNA2, KCNA3, KCNA5, KCNAB2, KCNC1, KCNC2, KCNC3, KCNE1, KCNE2, KCNE3, KCNE4, KCNH1, KCNH2, KCNQ1, KCNQ2, KCNQ3, KCNQ5, KCNS3, PKIA	PKA inhibitor
535	93.16	cp	BRD-K85503079	perospirone	Dopamine receptor antagonist		DRD2, HTR2A, DRD3, DRD4, HTR2C	Dopamine receptor antagonist, Serotonin receptor antagonist
536	93.16	cp	BRD-K82823804	SA-792987	PKC inhibitor		WEE1	PKC inhibitor
537	93.14	cp	BRD-K52397688	amperozide	Dopamine receptor antagonist		HTR2A, DRD2, FAAH	Dopamine receptor antagonist
538	93.11	cp	BRD-K27450477	EHNA	Adenosine deaminase inhibitor		ADA, PDE2A, ADORA2A	Adenosine deaminase inhibitor
550	92.79	cp	BRD-M07438658	lapatinib	EGFR inhibitor		EGFR, ERBB2, CYP3A5	EGFR inhibitor, ErbB2 inhibitor
552	92.75	cp	BRD-U73238814	QL-XI-92	DDR1 inhibitor		DDR1	DDR1 inhibitor
554	92.74	cp	BRD-K42098891	protriptyline	Tricyclic antidepressant		SLC6A2, SLC6A4	Tricyclic antidepressant
556	92.55	cp	BRD-A31204924	mitotane	Antineoplastic		CYP11B1, CYP11A1, CYP3A4, ESR1, FDX1	Antineoplastic
558	92.53	cp	BRD-A32949107	MRS-1845	Calcium channel blocker		ORAI1	Calcium channel blocker
563	92.43	cp	BRD-A80775386	hyperforin	Cyclooxygenase inhibitor		NR1I2, ALOX5, PTGS1, TRPC6	Cyclooxygenase inhibitor, Dopamine uptake inhibitor, Interleukin receptor antagonist, Lipoxygenase inhibitor, Serotonin reuptake inhibitor
566	92.41	cp	BRD-K64835161	BRD-K64835161	-666		CLK1, CLK4, DYRK1B	-666
567	92.4	cp	BRD-K28761384	zuclopenthixol	Dopamine receptor antagonist		DRD2, DRD1, ADRA1A, ADRA2A, DRD5, HRH1, HTR2A	Dopamine receptor antagonist
569	92.36	cp	BRD-K88429204	pyrimethamine	Dihydrofolate reductase inhibitor		DHFR, DHFRP1, HEXA, SLC47A1, STAT3	Dihydrofolate reductase inhibitor
570	92.35	cp	BRD-A54845972	dihydroergotamine	Serotonin receptor agonist		HTR1D, HTR1B, ADRA2A, DRD2, HTR1E, HTR1F, HTR2B, HTR7	Serotonin receptor agonist
571	92.34	cp	BRD-A62184259	cycloheximide	Protein synthesis inhibitor		GSK3B, RPL3	Protein synthesis inhibitor
572	92.3	cp	BRD-K11634954	GBR-13069	Dopamine uptake inhibitor		SLC6A3	Dopamine uptake inhibitor
574	92.25	cp	BRD-K28120222	parthenolide	NFkB pathway inhibitor		ADIPOR2, IKBKB, RELA	NFkB pathway inhibitor
575	92.22	cp	BRD-K78599730	manumycin-a	Farnesyltransferase inhibitor		FNTA, IKBKB	Farnesyltransferase inhibitor, NFkB pathway inhibitor
577	92.02	cp	BRD-K15600710	obatoclax	BCL inhibitor		BCL2, BCL2L1, MCL1	BCL inhibitor
593	91.83	cp	BRD-K47983010	BX-795	IKK inhibitor		PDPK1, CDK2, CHEK1, GSK3B, IKBKE, KDR, PDK1, TBK1	IKK inhibitor
594	91.8	cp	BRD-K43796186	benzyl-quinazolin-4-yl-amine	EGFR inhibitor		EGFR	EGFR inhibitor
596	91.7	cp	BRD-A34751532	homosalate	HSP inducer			HSP inducer
599	91.58	cp	BRD-K73991644	isoquercetin	Aldose reductase inhibitor		AKR1B1, ACE	Aldose reductase inhibitor
602	91.54	cp	BRD-K03406345	azacitidine	DNA methyltransferase inhibitor		DNMT1	DNA methyltransferase inhibitor
606	91.47	cp	BRD-K33106058	cytarabine	Ribonucleotide reductase inhibitor		POLB, POLA1	Ribonucleotide reductase inhibitor
607	91.42	cp	BRD-K77008974	WYE-354	MTOR inhibitor		MTOR	MTOR inhibitor
612	91.3	cp	BRD-K77286328	reversine	Aurora kinase inhibitor		AURKB, ADORA3, AURKA, INCENP, MAP2K1	Aurora kinase inhibitor
621	91.04	cp	BRD-K17561142	amiodarone	Potassium channel blocker		KCNH2, ADRB1, CACNA1H, CACNA2D2, CHRM3, CYP2C8, KCNA7, SCN5A	Potassium channel blocker
624	90.98	cp	BRD-K95921201	reserpine	Vesicular monoamine transporter inhibitor		SLC18A2, SLC18A1	Vesicular monoamine transporter inhibitor
632	90.8	cp	BRD-A68930007	ouabain	ATPase inhibitor		ATP1A1, ATP1A2, ATP1A3, ATP1A4, ATP1B1, ATP1B2, ATP1B3, ATP1B4, FXYD2	ATPase inhibitor
633	90.8	cp	BRD-A83326220	brazilin	Nitric oxide production inhibitor			Nitric oxide production inhibitor
644	90.49	cp	BRD-A52326238	isogedunin	HSP inhibitor			HSP inhibitor
650	90.4	cp	BRD-A84481105	thioridazine	Dopamine receptor antagonist		DRD1, DRD2, HTR2A, ADRA1A, ADRA1B, CHRNA7, DRD5, HRH1, HTR1A, HTR2C, HTR6, HTR7, KCNH2, MALT1	Dopamine receptor antagonist
653	90.35	cp	BRD-A55484088	BNTX	Opioid receptor antagonist		OPRD1, OPRK1, OPRM1	Opioid receptor antagonist
654	90.32	cp	BRD-A70449690	forskolin	Adenylyl cyclase activator		ADCY2, ADCY5, GNAS	Adenylyl cyclase activator
655	90.31	cp	BRD-K40919711	BAPTA-AM	Potassium channel blocker		KCNA3, KCNA5, KCNH2	Potassium channel blocker
660	90.24	cp	BRD-K35573744	erbstatin-analog	EGFR inhibitor		EGFR	EGFR inhibitor
661	90.23	cp	BRD-K37846922	3,3'-diindolylmethane	CHK inhibitor		AHR, AR, CYP1A2, GUSB, IDO1	CHK inhibitor, Cytochrome P450 activator, Indoleamine 2,3-dioxygenase inhibitor
663	90.15	cp	BRD-K10042277	desmethylclozapine	Acetylcholine receptor agonist		CHRM1, DRD2, DRD3, HTR2A	Acetylcholine receptor agonist
665	90.1	cp	BRD-K84709232	caffeic-acid	Lipoxygenase inhibitor		ALOX5, MIF, RELA, TNF	Lipoxygenase inhibitor, HIV integrase inhibitor, NFkB pathway inhibitor, Nitric oxide production inhibitor, PPAR receptor modulator, TNF production inhibitor, Tumor necrosis factor production inhibitor
668	90.05	cp	BRD-K72264770	QW-BI-011	Histone lysine methyltransferase inhibitor		EHMT2	Histone lysine methyltransferase inhibitor
670	90.03	cp	BRD-K10995081	perphenazine	Dopamine receptor antagonist		DRD2, CALM1, DRD1, HRH1, HTR2A, HTR2C, HTR6, HTR7	Dopamine receptor antagonist
673	89.96	cp	BRD-K56429665	calcipotriol	Vitamin D receptor agonist		VDR	Vitamin D receptor agonist
674	89.95	cp	BRD-K84987553	MDM2-inhibitor	MDM inhibitor		MDM2	MDM inhibitor
675	89.94	cp	BRD-A43331270	niguldipine	Calcium channel blocker		ADRA1A, CACNA1C, ADRA1B, ADRA1D	Calcium channel blocker, Adrenergic receptor antagonist
677	89.91	cp	BRD-K58772419	AZD-6482	PI3K inhibitor		PIK3CD, PIK3CG, PIK3CA, PIK3CB	PI3K inhibitor
679	89.87	cp	BRD-K63923597	barasertib	Aurora kinase inhibitor		AURKB, AURKC	Aurora kinase inhibitor
682	89.85	cp	BRD-A78360835	cercosporin	Photoactivated toxin			Photoactivated toxin
684	89.79	cp	BRD-K35430135	SR-59230A	Adrenergic receptor antagonist		ADRB3, ADRB1, ADRB2	Adrenergic receptor antagonist
686	89.75	cp	BRD-K37691127	hinokitiol	Tyrosinase inhibitor		TYR	Tyrosinase inhibitor
687	89.72	cp	BRD-A97701745	pindolol	Adrenergic receptor antagonist		ADRB1, ADRB2, HTR1A, HTR1B, HTR2A, HTR2B	Adrenergic receptor antagonist, Serotonin receptor antagonist
688	89.71	cp	BRD-A54490543	pirlindole	Monoamine oxidase inhibitor		MAOA, SLC6A2, SLC6A4	Monoamine oxidase inhibitor
691	89.67	cp	BRD-K96799727	pifithrin-mu	HSP inhibitor		HSPA1A, TP53	HSP inhibitor
693	89.61	cp	BRD-A45498368	WYE-125132	MTOR inhibitor		MTOR, PIK3CA	MTOR inhibitor
696	89.53	cp	BRD-A81402010	KU-C103443N	CDC inhibitor			CDC inhibitor, Rho associated kinase inhibitor
697	89.46	cp	BRD-K30867024	SB-216641	Serotonin receptor antagonist		HTR1B, HTR1D, HTR1A, HTR2A, HTR2B, HTR2C	Serotonin receptor antagonist
698	89.42	cp	BRD-K99964838	bosutinib	ABL inhibitor		ABL1, SRC, BCR, CAMK2G, LYN, CAMK1D, CDK2, FRK, FYN, HCK, MAP2K1, MAP2K2, MAP3K2, MAP4K5, STK10, STK24, STK4, TNK2, TXK	ABL inhibitor, BCR-ABL kinase inhibitor, SRC inhibitor
702	89.37	cp	BRD-A51393488	noscapine	Bradykinin receptor antagonist		BDKRB2, SIGMAR1	Bradykinin receptor antagonist, Tubulin inhibitor
703	89.34	cp	BRD-K68488863	ENMD-2076	FLT3 inhibitor		AURKA, FLT3, KDR, PDGFRA, SRC, CSF1R, EPHA1, FGFR1, FGFR2, FGFR3, FLT4, KIT, PTK2	FLT3 inhibitor, VEGFR inhibitor, Aurora kinase inhibitor
705	89.32	cp	BRD-K28360340	TW-37	BCL inhibitor		BCL2, BCL2L1, MCL1	BCL inhibitor
717	88.82	cp	BRD-A50737080	CGK-733	ATR kinase inhibitor		ATM, ATR	ATR kinase inhibitor
718	88.81	cp	BRD-U33728988	QL-X-138	MTOR inhibitor		BTK, JAK3, MKNK2, MTOR, PRKDC	MTOR inhibitor
719	88.8	cp	BRD-K94325918	kinetin-riboside	Apoptosis stimulant			Apoptosis stimulant
725	88.68	cp	BRD-K97330509	SRC-kinase-inhibitor-II	SRC inhibitor			SRC inhibitor
726	88.68	cp	BRD-K09778810	FGIN-1-27	Inositol monophosphatase inhibitor		TSPO	Inositol monophosphatase inhibitor
728	88.65	cp	BRD-K05926469	lenalidomide	Antineoplastic		CRBN, TNF, CDH5, PTGS2, TNFSF11	Antineoplastic
729	88.63	cp	BRD-K26669427	WR-216174	PFMRK inhibitor			PFMRK inhibitor
731	88.61	cp	BRD-K30097969	pitavastatin	HMGCR inhibitor		HMGCR, APOA1, CYP2C8	HMGCR inhibitor
738	88.47	cp	BRD-K61401890	deguelin	NADH-ubiquinone oxidoreductase (Complex I) inhibitor		AKT1, PTGS2	NADH-ubiquinone oxidoreductase (Complex I) inhibitor
739	88.44	cp	BRD-K49294207	BIBU-1361	EGFR inhibitor		EGFR	EGFR inhibitor
740	88.37	cp	BRD-K68065987	MK-2206	AKT inhibitor		AKT1, AKT2, AKT3	AKT inhibitor
742	88.32	cp	BRD-M86331534	pyrvinium-pamoate	AKT inhibitor		AR	AKT inhibitor
744	88.29	cp	BRD-K21806131	tegaserod	Serotonin receptor partial agonist		HTR4, HTR2B, HTR2A, HTR2C	Serotonin receptor partial agonist
745	88.28	cp	BRD-A11678676	wortmannin	PI3K inhibitor		PIK3CA, PIK3CG, PLK1, ATM, ATR, MTOR, PI4KA, PI4KB, PIK3CD, PIK3R1, PLK3, PRKDC	PI3K inhibitor
746	88.25	cp	BRD-K68246049	TTNPB	Retinoid receptor agonist		RARB, RARA, RARG	Retinoid receptor agonist
747	88.25	cp	BRD-A56987319	SQ-22536	Adenylyl cyclase inhibitor		ADCY1, ADCY5	Adenylyl cyclase inhibitor
750	88.12	cp	BRD-K76840893	RS-17053	Adrenergic receptor antagonist		ADRA1A, ADRA1D	Adrenergic receptor antagonist
753	88.02	cp	BRD-A43974575	tranylcypromine	Monoamine oxidase inhibitor		MAOA, MAOB, KDM1A, CYP2A6	Monoamine oxidase inhibitor
759	87.91	cp	BRD-K65786282	CGP-7930	GABA receptor modulator		GABBR1	GABA receptor modulator, GABA receptor positive allosteric modulator
760	87.85	cp	BRD-K98426715	tubacin	HDAC inhibitor		HDAC6	HDAC inhibitor
768	87.64	cp	BRD-K16406336	methylene-blue	Guanylyl cyclase inhibitor		ACHE, MAPT	Guanylyl cyclase inhibitor, Monoamine oxidase inhibitor, Nitric oxide production inhibitor, Tau aggregation inhibitor
770	87.6	cp	BRD-K66707493	lawsone	Coloring agent			Coloring agent
774	87.52	cp	BRD-K82846253	repaglinide	Insulin secretagogue		ABCC8, CYP2C8, CYP3A5, INS, KCNJ11, PPARG	Insulin secretagogue
778	87.39	cp	BRD-K37720887	SB-525334	TGF beta receptor inhibitor		TGFBR1	TGF beta receptor inhibitor
784	87.16	cp	BRD-K82036761	sertraline	Serotonin receptor antagonist		SLC6A4, CYP2C19, SLC6A3	Serotonin receptor antagonist
786	87.14	cp	BRD-K14618467	IKK-16	IKK inhibitor		IKBKB	IKK inhibitor
789	87.08	cp	BRD-K47598052	PP-1	SRC inhibitor		HCK, RET, SRC	SRC inhibitor, ABL inhibitor
790	87.05	cp	BRD-K33864865	LY-225910	CCK receptor antagonist		CCKBR	CCK receptor antagonist
797	86.85	cp	BRD-K68997413	PF-3845	FAAH inhibitor		FAAH	FAAH inhibitor
799	86.71	cp	BRD-K26521938	dinoprostone	Prostanoid receptor agonist		PTGER2, PTGER1, PTGER3, PTGER4, CATSPER1, CATSPER2, CATSPER3, CATSPER4, PTGDR, PTGDR2, PTGFR, TBXA2R	Prostanoid receptor agonist
803	86.62	cp	BRD-K63675182	triflupromazine	Dopamine receptor antagonist		HTR2B, CHRM1, CHRM2, CHRNA7, DRD1, DRD2	Dopamine receptor antagonist
804	86.53	cp	BRD-K82357231	desloratadine	Histamine receptor antagonist		HRH1	Histamine receptor antagonist
808	86.39	cp	BRD-K07507905	BRL-37344	Adrenergic receptor agonist		ADRB3, ADRB1, ADRB2	Adrenergic receptor agonist
811	86.33	cp	BRD-A82590476	SDZ-NKT-343	Tachykinin antagonist		TACR1	Tachykinin antagonist
813	86.29	cp	BRD-K56614220	clofazimine	GK0582 inhibitor			GK0582 inhibitor
815	86.17	cp	BRD-A63998256	helveticoside	ATPase inhibitor		ATP1A1	ATPase inhibitor
817	86.09	cp	BRD-K18036262	L-168049	Glucagon receptor antagonist		GCGR	Glucagon receptor antagonist
820	85.99	cp	BRD-K12184916	dactolisib	MTOR inhibitor		MTOR, PIK3CA, PIK3CG, PIK3CD, ATR, PIK3CB	MTOR inhibitor, PI3K inhibitor, Protein kinase inhibitor
821	85.97	cp	BRD-K08589866	linsitinib	IGF-1 inhibitor		IGF1R, INSR, INSRR	IGF-1 inhibitor
823	85.95	cp	BRD-A81177136	KN-62	Calcium-calmodulin dependent protein kinase inhibitor		AKT1, CAMK2A, CHEK1, LCK, MAPK1, MAPK11, MAPK12, MAPK14, MAPK8, P2RX7, PRKCA, ROCK1, RPS6KB1, SGK1	Calcium-calmodulin dependent protein kinase inhibitor, Purinergic receptor antagonist
826	85.84	cp	BRD-K79353516	indolophenanthridine	CALY activator		CALY, DRD1	CALY activator
829	85.79	cp	BRD-K07888107	depudecin	HDAC inhibitor		HDAC1, HDAC2	HDAC inhibitor
833	85.62	cp	BRD-K00486786	RO-08-2750	NGF binding inhibitor		NGFR, NGF	NGF binding inhibitor
834	85.61	cp	BRD-K65285700	BRD-K65285700	Cannabinoid receptor agonist		CNR2	Cannabinoid receptor agonist
835	85.58	cp	BRD-K20742498	RS-39604	Serotonin receptor antagonist		HTR4	Serotonin receptor antagonist
836	85.58	cp	BRD-K10098805	rhapontin	Apoptosis stimulant			Apoptosis stimulant
839	85.53	cp	BRD-A34806832	proscillaridin	ATPase inhibitor		ATP1A1	ATPase inhibitor
876	84.49	cp	BRD-M64432851	sunitinib	FLT3 inhibitor		FLT3, KDR, KIT, FLT4, FLT1, PDGFRA, PDGFRB, RET, CSF1R, FGFR1	FLT3 inhibitor, KIT inhibitor, PDGFR receptor inhibitor, RET tyrosine kinase inhibitor, VEGFR inhibitor
877	84.47	cp	BRD-K51941867	LM-1685	Cyclooxygenase inhibitor		PTGS2	Cyclooxygenase inhibitor
881	84.32	cp	BRD-K92049597	triamterene	Sodium channel blocker		SCNN1A, SCNN1B, SCNN1G, SCNN1D	Sodium channel blocker
882	84.31	cp	BRD-K05653692	DL-PDMP	Glucosyltransferase inhibitor		ASAH1, UGCG	Glucosyltransferase inhibitor
884	84.28	cp	BRD-K62289640	lylamine	Cannabinoid receptor agonist		CNR1	Cannabinoid receptor agonist
888	84.13	cp	BRD-K92000912	AM-251	Cannabinoid receptor antagonist		CNR1, GPR18, GPR55	Cannabinoid receptor antagonist
893	84.03	cp	BRD-K56343971	vemurafenib	RAF inhibitor		BRAF, CYP2C19, CYP3A4, CYP3A5, RAF1	RAF inhibitor
897	83.98	cp	BRD-K34995470	SU-1498	VEGFR inhibitor		ERBB2, KDR	VEGFR inhibitor
899	83.85	cp	BRD-A98378129	talniflumate	Cyclooxygenase inhibitor		CLCA1	Cyclooxygenase inhibitor
908	83.5	cp	BRD-K02965346	SU-11274	Hepatocyte growth factor receptor inhibitor		MET	Hepatocyte growth factor receptor inhibitor, Tyrosine kinase inhibitor
912	83.45	cp	BRD-K50168500	canertinib	EGFR inhibitor		EGFR, ERBB2, ERBB4, AKT1	EGFR inhibitor
913	83.44	cp	BRD-K38477985	malonoben	Protein tyrosine kinase inhibitor		EGFR	Protein tyrosine kinase inhibitor
914	83.42	cp	BRD-A56892734	esomeprazole	ATPase inhibitor		ATP4A, CYP2C19, CYP3A4	ATPase inhibitor
916	83.29	cp	BRD-A79803969	memantine	Glutamate receptor antagonist		GRIN1, CHRFAM7A, CYP2E1, DRD2, GRIN2A, GRIN2B, GRIN3A, HTR3A	Glutamate receptor antagonist
917	83.25	cp	BRD-K39944607	ochratoxin-a	Phenylalanyl tRNA synthetase inhibitor		SLC22A6	Phenylalanyl tRNA synthetase inhibitor
921	83.2	cp	BRD-K64881305	ispinesib	Kinesin-like spindle protein inhibitor		KIF11	Kinesin-like spindle protein inhibitor
924	83.15	cp	BRD-K56745457	azauridine	Antiviral			Antiviral
925	83.07	cp	BRD-K99818283	PIK-90	PI3K inhibitor			PI3K inhibitor
932	82.94	cp	BRD-K42452249	EO-1428	p38 MAPK inhibitor		MAPK11, MAPK14	p38 MAPK inhibitor
937	82.82	cp	BRD-K27665173	D-64406	PDGFR receptor inhibitor		FLT3, PDGFRA, PDGFRB	PDGFR receptor inhibitor
940	82.64	cp	BRD-K31611373	fluprostenol	Prostanoid receptor agonist		PTGER3, PTGFR, TBXA2R	Prostanoid receptor agonist
947	82.38	cp	BRD-K17497770	butein	EGFR inhibitor		ACE, CXCL8, IL6, SIRT1, SRD5A1, SRD5A2, TNF	EGFR inhibitor, SRC inhibitor
948	82.36	cp	BRD-K89997465	chlorpromazine	Dopamine receptor antagonist		DRD2, ADRA2A, ADRA2B, ADRA2C, DRD1, DRD3, DRD4, DRD5, HRH1, HTR1A, HTR2A, HTR2C, HTR6, HTR7, ADRA1A, ADRA1B, ADRA1D, CALM1, CHRM1, CHRM3, HRH4, HTR2B, KCNH2, KIF11, ORM1, ORM2, SMPD1, TRPC5	Dopamine receptor antagonist
957	82.17	cp	BRD-K77947974	fluspirilene	Dopamine receptor antagonist		DRD2, HTR2A, CACNG1, HRH1, HTR1A, HTR1D, HTR1E	Dopamine receptor antagonist
958	82.15	cp	BRD-K89626439	sirolimus	MTOR inhibitor		MTOR, FKBP1A, CCR5, FGF2	MTOR inhibitor
961	81.94	cp	BRD-K23383398	T-0901317	LXR agonist		NR1H3, NR1H2, ABCA1, NCOA1, NCOA2, NR1I2, RORA, RORC, RXRB	LXR agonist, ABC transporter expression enhancer, ROR inverse agonist
966	81.77	cp	BRD-K08219523	5-nonyloxytryptamine	Serotonin receptor agonist		HTR1B, HTR1D	Serotonin receptor agonist
967	81.74	cp	BRD-K67868012	PI-103	MTOR inhibitor		PIK3CA, PIK3CG, MTOR, PIK3CB, PIK3CD, PRKDC	MTOR inhibitor, PI3K inhibitor
968	81.69	cp	BRD-A32349859	methyl-angolensate	Apoptosis inhibitor		HTR2B	Apoptosis inhibitor
969	81.63	cp	BRD-K49657628	tyrphostin-AG-18	EGFR inhibitor		EGFR	EGFR inhibitor, Tyrosine kinase inhibitor
971	81.6	cp	BRD-A39522003	OMDM-2	FAAH inhibitor		GPR119	FAAH inhibitor
972	81.58	cp	BRD-K39120595	bithionol	Autotaxin inhibitor		ESR1, ESR2, MCL1	Autotaxin inhibitor
974	81.55	cp	BRD-K15616905	CCCP	Mitochondrial oxidative phosphorylation uncoupler			Mitochondrial oxidative phosphorylation uncoupler
976	81.43	cp	BRD-A98283014	calmidazolium	Calcium channel blocker		ATP2B1, PDE1A	Calcium channel blocker, Calmodulin antagonist
985	81.1	cp	BRD-K76805682	SB-415286	Glycogen synthase kinase inhibitor		GSK3B, GSK3A, RPS6KB1	Glycogen synthase kinase inhibitor
990	80.93	cp	BRD-A42423104	benproperine	Antitussive			Antitussive
992	80.93	cp	BRD-K07881437	danusertib	Aurora kinase inhibitor		AURKA, AURKB, AURKC, FGFR1, NTRK1, RET, BCR, SLK	Aurora kinase inhibitor, Growth factor receptor inhibitor
993	80.88	cp	BRD-K62363391	dapsone	Bacterial antifolate		DHFR	Bacterial antifolate
1012	80.3	cp	BRD-K94832621	Y-134	Estrogen receptor antagonist		ESR1, ESR2	Estrogen receptor antagonist
1015	80.18	cp	BRD-K76907295	VU-0418947-2	HIF modulator			HIF modulator
1018	80.11	cp	BRD-A06352418	terfenadine	Histamine receptor antagonist		HRH1, KCNH2, CHRM1, CHRM2, CHRM3, CHRM4, CHRM5, KCNH1	Histamine receptor antagonist
1020	80.11	cp	BRD-A35588707	teniposide	Topoisomerase inhibitor		TOP2A, CYP3A5	Topoisomerase inhibitor
1023	80	cp	BRD-K40175214	torin-1	MTOR inhibitor		MTOR, PIK3CA	MTOR inhibitor, PI3K inhibitor
1029	79.92	cp	BRD-K56001384	antimycin-a	ATP synthase inhibitor		CYCS	ATP synthase inhibitor
1033	79.83	cp	BRD-K01649396	indatraline	Norepinephrine transporter inhibitor		SLC6A2, SLC6A3, SLC6A4	Norepinephrine transporter inhibitor
1036	79.79	cp	BRD-K72726508	arcyriaflavin-a	CDK inhibitor		CCND1, CCNE1, CDK2, CDK4	CDK inhibitor
1041	79.63	cp	BRD-K15262564	mupirocin	Isoleucyl-tRNA synthetase inhibitor			Isoleucyl-tRNA synthetase inhibitor
1044	79.59	cp	BRD-K07691486	roscovitine	CDK inhibitor		CDK2, CDK9, CDK7, CDK1, CDK5	CDK inhibitor
1048	79.57	cp	BRD-K44432556	VU-0418946-1	HIF modulator		HIF1A	HIF modulator
1057	79.23	cp	BRD-K59184148	SB-216763	Glycogen synthase kinase inhibitor		GSK3B, CCNA2, CDK2, GSK3A	Glycogen synthase kinase inhibitor
1063	78.99	cp	BRD-K31238592	devazepide	CCK receptor antagonist		CCKAR, CCKBR, GAST	CCK receptor antagonist
1066	78.86	cp	BRD-A30435184	metergoline	Dopamine receptor agonist		DRD2, HTR1A, HTR1B, HTR1D, HTR1E, HTR1F, HTR2A, HTR2B, HTR2C, HTR5A, HTR6, HTR7	Dopamine receptor agonist, Serotonin receptor antagonist
1069	78.77	cp	BRD-A55913614	primaquine	Antimalarial		KRT7, NQO2	Antimalarial, DNA inhibitor
1072	78.71	cp	BRD-K51805276	temefos	Cholinesterase inhibitor			Cholinesterase inhibitor
1073	78.7	cp	BRD-A54927599	KF-38789	P-selectin inhibitor		SELP	P-selectin inhibitor
1081	78.53	cp	BRD-K14681867	somatostatin	Somatostatin receptor agonist		SSTR1, SSTR2, SSTR3, SSTR4, SSTR5, GH1, GHR, OPRD1, OPRM1	Somatostatin receptor agonist
1084	78.46	cp	BRD-K26015241	ODQ	Guanylyl cyclase inhibitor		GUCY1A2, GUCY1A3, GUCY1B3	Guanylyl cyclase inhibitor
1085	78.45	cp	BRD-A29082194	gitoxigenin	ATPase inhibitor		ATP1A1	ATPase inhibitor
1088	78.36	cp	BRD-A11007541	BCI-hydrochloride	Protein phosphatase inhibitor		DUSP1, DUSP6	Protein phosphatase inhibitor
1090	78.3	cp	BRD-U37049823	HG-6-64-01	RAF inhibitor		ABL1, BRAF, CSF1R, EGFR, FGFR1, FLT3, KIT, MAPK11, PDGFRB, RET	RAF inhibitor
1091	78.25	cp	BRD-K19360254	ergocornine	Dopamine receptor agonist		DRD2	Dopamine receptor agonist
1095	78.09	cp	BRD-K02265150	amoxapine	Norepinephrine reuptake inhibitor		SLC6A2, SLC6A4, HTR2A, HTR6, ADRA1A, ADRA1B, ADRA1D, ADRA2A, ADRA2B, ADRA2C, CHRM1, CHRM2, CHRM3, CHRM4, CHRM5, DRD1, DRD2, DRD3, DRD4, GABRA1, GABRA2, GABRA3, GABRA4, GABRA5, GABRA6, GABRB1, GABRB2, GABRB3, GABRD, GABRE, GABRG1, GABRG2, GABRG3, GABRP, GABRQ, HRH1, HRH4, HTR1A, HTR1B, HTR2B, HTR2C, HTR3A, HTR7, SLC6A3	Norepinephrine reuptake inhibitor
1098	78.05	cp	BRD-K64517075	heliomycin	ATP synthase inhibitor			ATP synthase inhibitor
1100	77.99	cp	BRD-K74305673	IKK-2-inhibitor-V	IKK inhibitor		IKBKB	IKK inhibitor, NFkB pathway inhibitor
1103	77.94	cp	BRD-A48261811	argatroban	Thrombin inhibitor		F2, CYP3A5	Thrombin inhibitor
1104	77.91	cp	BRD-K96778649	tyrphostin-47	EGFR inhibitor		EGFR	EGFR inhibitor
1105	77.91	cp	BRD-K13211965	L-741742	Dopamine receptor antagonist		DRD4, DRD3, SCN1A, SCN3A	Dopamine receptor antagonist
1107	77.84	cp	BRD-K28667196	fillalbin	Increases arterial blood pressure			Increases arterial blood pressure
1108	77.83	cp	BRD-K33308633	INCA-6	Calcineurin inhibitor		NFATC1	Calcineurin inhibitor
1111	77.77	cp	BRD-A38030642	cyclosporin-a	Calcineurin inhibitor		PPIA, ABCB11, CAMLG, CYP3A5, CYP3A7, FPR1, PPID, PPIF, PPP3CA, PPP3R2, SLC10A1, SLCO1B1, SLCO1B3	Calcineurin inhibitor
1112	77.74	cp	BRD-K17378184	prestwick-559	Dopamine receptor agonist		DRD3, ADRA1A, ADRA1D, ADRA2A, DRD1, DRD2, DRD4, HTR1A, HTR2B	Dopamine receptor agonist
1114	77.71	cp	BRD-K29673530	hypericin	Tyrosine kinase inhibitor			Tyrosine kinase inhibitor
1116	77.63	cp	BRD-K73838513	cinacalcet	Calcium channel activator		CASR	Calcium channel activator
1117	77.62	cp	BRD-K26117720	gingerol	Nitric oxide synthase inhibitor			Nitric oxide synthase inhibitor
1118	77.6	cp	BRD-A73605923	mocimycin	Protein synthesis inhibitor			Protein synthesis inhibitor
1127	77.31	cp	BRD-A10977446	carvedilol	Adrenergic receptor antagonist		ADRB1, ADRB2, ADRA1A, ADRA1B, ADRA1D, ADRA2A, ADRA2B, ADRA2C, ADRB3, CYP2C19, CYP2E1, GJA1, HIF1A, KCNH2, NDUFC2, NPPB, RYR2, SELE, VCAM1, VEGFA	Adrenergic receptor antagonist
1128	77.25	cp	BRD-U44618005	WH-4023	SRC inhibitor		ABL1, LCK, SRC	SRC inhibitor
1131	77.09	cp	BRD-A99449986	MT-21	Caspase activator		CYCS, SLC25A4	Caspase activator
1134	76.98	cp	BRD-K20287671	SU-4312	PDGFR receptor inhibitor		KDR, PDGFRB	PDGFR receptor inhibitor, Tyrosine kinase inhibitor, VEGFR inhibitor
1135	76.88	cp	BRD-A04756508	norgestimate	Progesterone receptor agonist		PGR, ESR1	Progesterone receptor agonist
1136	76.87	cp	BRD-K80970344	pyrrolidine-dithiocarbamate	NFkB pathway inhibitor		HSD11B1, RELA	NFkB pathway inhibitor
1141	76.66	cp	BRD-K08273968	griseofulvin	Tubulin inhibitor		KRT12	Tubulin inhibitor
1145	76.49	cp	BRD-K09907482	PRL-3-inhibitor-I	Tyrosine phosphatase inhibitor		PTP4A3	Tyrosine phosphatase inhibitor
1146	76.48	cp	BRD-K85603128	resorcinol	Phosphodiesterase inhibitor		CA12, CA14, CA2, PTGS1	Phosphodiesterase inhibitor
1153	75.97	cp	BRD-K57304726	PRE-084	Sigma receptor agonist		SIGMAR1	Sigma receptor agonist
1155	75.96	cp	BRD-K53123955	niridazole	Phosphofructokinase inhibitor			Phosphofructokinase inhibitor
1158	75.83	cp	BRD-K64785675	TG100-115	-666		PIK3CG, PIK3CA, PIK3CB, PIK3CD	-666
1159	75.83	cp	BRD-K93480852	KN-93	Calcium-calmodulin dependent protein kinase inhibitor		CAMK2A	Calcium-calmodulin dependent protein kinase inhibitor
1160	75.81	cp	BRD-A20968261	WAY-213613	Glutamate inhibitor		SLC1A2	Glutamate inhibitor
1167	75.72	cp	BRD-K05977823	tenovins	SIRT inhibitor		SIRT1, SIRT2	SIRT inhibitor, TP53 activator
1168	75.59	cp	BRD-K20995441	U-54494A	Opioid receptor agonist			Opioid receptor agonist
1169	75.57	cp	BRD-K37456065	VU-0365114-2	M5 modulator		CHRM5	M5 modulator
1174	75.37	cp	BRD-K59469039	AG-879	Angiogenesis inhibitor		ERBB2, KDR, NTRK1	Angiogenesis inhibitor, Tyrosine kinase inhibitor, VEGFR inhibitor
1175	75.34	cp	BRD-K33882852	ZK-93423	Benzodiazepine receptor agonist		GABRA1, GABRA2, GABRA3, GABRA5, GABRB2, GABRG2	Benzodiazepine receptor agonist
1181	75.04	cp	BRD-K15563106	phloretin	Sodium/glucose cotransporter inhibitor		AQP9, CLCN3, SLC23A1	Sodium/glucose cotransporter inhibitor
1190	74.7	cp	BRD-U25771771	WZ-4-145	EGFR inhibitor		CSF1R, DDR1, EGFR, PDGFRA, TIE1	EGFR inhibitor
1191	74.7	cp	BRD-K67445247	flurofamide	Urease inhibitor			Urease inhibitor
1192	74.65	cp	BRD-K65503129	HSP90-inhibitor	HSP inhibitor		HSP90AA1, HSP90AB1	HSP inhibitor
1201	74.4	cp	BRD-A24429032	HEAT	Adrenergic receptor antagonist		ADRA1A	Adrenergic receptor antagonist
1203	74.32	cp	BRD-K37130656	rivaroxaban	Coagulation inhibitor		F10, CYP2J2, CYP3A5	Coagulation inhibitor
1205	74.25	cp	BRD-K37798499	etoposide	Topoisomerase inhibitor		TOP2A, CYP2E1, CYP3A5, TOP2B	Topoisomerase inhibitor
1210	74.18	cp	BRD-A83695761	chromanol	Potassium channel blocker			Potassium channel blocker
1214	74.08	cp	BRD-K78122587	NNC-55-0396	T-type calcium channel blocker		CATSPER1, CATSPER2, CATSPER3, CATSPER4	T-type calcium channel blocker
1215	74.02	cp	BRD-A25004090	erastin	Ion channel antagonist		VDAC2	Ion channel antagonist
1218	73.83	cp	BRD-K15402119	huperzine-a	Acetylcholinesterase inhibitor		ACHE	Acetylcholinesterase inhibitor
1222	73.77	cp	BRD-A02333338	cyclopamine	Smoothened receptor antagonist		SMO, DHH, IHH, PTCH1	Smoothened receptor antagonist
1225	73.61	cp	BRD-A33084410	5'-guanidinonaltrindole	Opioid receptor antagonist			Opioid receptor antagonist
1228	73.55	cp	BRD-K70557564	zosuquidar	P-glycoprotein inhibitor		ABCB1, ABCB4	P-glycoprotein inhibitor
1231	73.49	cp	BRD-K34014345	naproxol	Anti-inflammatory		PTGS1, PTGS2	Anti-inflammatory
1234	73.4	cp	BRD-K47150025	KI-8751	VEGFR inhibitor		KDR	VEGFR inhibitor, KIT inhibitor, PDGFR receptor inhibitor
1236	73.37	cp	BRD-K63504947	semaxanib	VEGFR inhibitor		KDR, FLT1, KIT, PDGFRB, FGFR1, FLT3, MET, PDGFRA, RET	VEGFR inhibitor
1237	73.29	cp	BRD-K34154330	tracazolate	GABA receptor modulator		GABRA1	GABA receptor modulator
1239	73.17	cp	BRD-K11158509	tyrphostin-B44	EGFR inhibitor			EGFR inhibitor
1243	73.04	cp	BRD-K81209512	AG-494	EGFR inhibitor		EGFR	EGFR inhibitor, Tyrosine kinase inhibitor
1246	72.93	cp	BRD-A08003242	rhodomyrtoxin-b	sodium fluorescein uptake inhibitor			sodium fluorescein uptake inhibitor
1252	72.8	cp	BRD-K31912990	CGP-71683	Neuropeptide receptor antagonist		NPY5R	Neuropeptide receptor antagonist
1262	72.51	cp	BRD-K65910366	KUC103904N	-666			-666
1263	72.48	cp	BRD-A80017228	bendroflumethiazide	Sodium/potassium/chloride transporter inhibitor		SLC12A3, CA1, CA2, CA4, KCNMA1, SLC12A1	Sodium/potassium/chloride transporter inhibitor
1267	72.39	cp	BRD-K40758068	efavirenz	HIV protease inhibitor		CYP2B6, CYP2C19, CYP2C8, CYP3A4, CYP3A5	HIV protease inhibitor
1269	72.35	cp	BRD-K17349619	HLI-373	MDM inhibitor		MDM2	MDM inhibitor
1270	72.31	cp	BRD-K74430258	1,2-dichlorobenzene	Hepatotoxicant			Hepatotoxicant, Organic compound
1277	72.1	cp	BRD-K06593056	LE-135	Retinoid receptor agonist		RARB	Retinoid receptor agonist
1280	72	cp	BRD-K94841585	emodic-acid	Laxative			Laxative
1284	71.97	cp	BRD-A16665823	butoconazole	Bacterial cell wall synthesis inhibitor			Bacterial cell wall synthesis inhibitor
1291	71.85	cp	BRD-K68095457	palmitoylethanolamide	Cannabinoid receptor agonist		CNR2, GPR119, GPR55	Cannabinoid receptor agonist
1293	71.83	cp	BRD-A04668240	CGP-52432	GABA receptor antagonist		GABBR1, GABBR2	GABA receptor antagonist
1294	71.82	cp	BRD-K06753942	nobiletin	MEK inhibitor		ABCB1, MAP2K1, TYR	MEK inhibitor
1305	71.4	cp	BRD-K13169950	NSC-3852	HDAC inhibitor		HDAC1	HDAC inhibitor
1307	71.37	cp	BRD-K73290745	ICI-199441	Opioid receptor agonist		OPRK1, CYP2D6, OPRD1, OPRM1, UTS2R	Opioid receptor agonist
1308	71.32	cp	BRD-K17294426	clebopride	Dopamine receptor antagonist		DRD2, ACHE	Dopamine receptor antagonist
1310	71.28	cp	BRD-K69932463	AZD-8055	MTOR inhibitor		MTOR	MTOR inhibitor
1311	71.27	cp	BRD-K51313569	palbociclib	CDK inhibitor		CDK4, CDK6, CCND3	CDK inhibitor
1318	70.99	cp	BRD-A10420615	cyclopiazonic-acid	ATPase inhibitor		ATP2A1	ATPase inhibitor
1319	70.98	cp	BRD-A19248578	latrunculin-b	Actin polymerization inhibitor		ACTA1, MKL1, SPIRE2	Actin polymerization inhibitor, Unidentified pharmacological activity
1320	70.97	cp	BRD-A03816571	CP-55940	Cannabinoid receptor agonist		CNR1, CNR2, CXCR4, GPR55	Cannabinoid receptor agonist
1323	70.93	cp	BRD-K14821540	FCCP	Mitochondrial oxidative phosphorylation uncoupler			Mitochondrial oxidative phosphorylation uncoupler
1328	70.75	cp	BRD-K78373679	RO-3306	CDK inhibitor		CDK1	CDK inhibitor
1329	70.72	cp	BRD-K10573841	tunicamycin	GLCNAC phosphotransferase inhibitor		GNPTAB	GLCNAC phosphotransferase inhibitor
1335	70.47	cp	BRD-K66296774	fluvastatin	HMGCR inhibitor		HMGCR, CYP2C8	HMGCR inhibitor
1336	70.46	cp	BRD-A85587465	bemesetron	Serotonin receptor antagonist		HTR3A, HTR3B	Serotonin receptor antagonist
1337	70.45	cp	BRD-K13356952	methazolamide	Carbonic anhydrase inhibitor		CA1, CA2, CA4, CA7, CA12, CA14, INS	Carbonic anhydrase inhibitor
1339	70.4	cp	BRD-K92301463	16,16-dimethylprostaglandin-e2	Prostanoid receptor agonist		HPGD	Prostanoid receptor agonist
1344	70.18	cp	BRD-K68867920	quetiapine	Dopamine receptor antagonist		DRD2, HTR1A, HTR2A, DRD1, HRH1, HTR1D, HTR1E, ADRA1A, ADRA1B, ADRA1D, ADRA2A, ADRA2B, ADRA2C, CHRM1, CHRM2, CHRM3, CHRM4, CHRM5, DRD3, DRD4, DRD5, HTR1B, HTR1F, HTR2C, HTR3A, HTR6, HTR7, SLC6A2	Dopamine receptor antagonist, Serotonin receptor antagonist
1346	70.1	cp	BRD-K70511574	sunitinib	PLK inhibitor		FLT3, KDR, KIT, FLT4, FLT1, PDGFRA, PDGFRB, RET, CSF1R, FGFR1	PLK inhibitor
1349	70.06	cp	BRD-K36864847	BD-1047	Adrenergic receptor antagonist		SIGMAR1	Adrenergic receptor antagonist
1350	69.92	cp	BRD-K17075857	chloroxine	Opioid receptor antagonist		OPRK1	Opioid receptor antagonist
1354	69.75	cp	BRD-A62890442	3-methyl-GABA	GABA aminotransferase activator			GABA aminotransferase activator
1355	69.72	cp	BRD-K87158025	benzamil	Sodium channel blocker		PKD2L1, SCNN1A, SCNN1B, SCNN1G, ASIC1, SCNN1D, SLC8A1	Sodium channel blocker
1356	69.66	cp	BRD-A74771556	nikkomycin	Chitin inhibitor			Chitin inhibitor
1358	69.52	cp	BRD-K07888196	tyrphostin-AG-538	IGF-1 inhibitor		EGFR	IGF-1 inhibitor
1361	69.44	cp	BRD-A19633847	perhexiline	Carnitine palmitoyltransferase inhibitor		CPT1A, CPT2	Carnitine palmitoyltransferase inhibitor
1366	69.25	cp	BRD-K22010301	JLK-6	Gamma secretase inhibitor		PSEN1	Gamma secretase inhibitor, Anti-amyloidogenic
1374	68.93	cp	BRD-A51382177	fosinopril	ACE inhibitor		ACE, ABCG2	ACE inhibitor
1378	68.73	cp	BRD-A49225603	alimemazine	Histamine receptor agonist		HRH1	Histamine receptor agonist
1388	68.33	cp	BRD-A36267905	buphenine	Adrenergic receptor agonist		ADRB2	Adrenergic receptor agonist
1389	68.29	cp	BRD-A29426959	carbinoxamine	Histamine receptor antagonist		HRH1	Histamine receptor antagonist, L-type calcium channel blocker
1394	68.14	cp	BRD-K54210043	NS-1619	Calcium channel activator		KCNMA1, KCNT1, KCNT2, KCNU1	Calcium channel activator
1401	67.94	cp	BRD-K73824630	skatole	Thrombin inhibitor		F2	Thrombin inhibitor
1403	67.83	cp	BRD-K03816923	rottlerin	MAP kinase inhibitor		KCNH2, PRKCD, TGM2	MAP kinase inhibitor, Protein kinase inhibitor
1404	67.82	cp	BRD-K49671696	ketanserin	Serotonin receptor antagonist		HTR2A, HTR2C, ADRA1A, ADRA1B, ADRA1D, DRD1, DRD5, HTR1A, HTR1B, HTR1D, HTR2B, HTR5A, HTR7, SLC18A1, SLC18A2	Serotonin receptor antagonist
1406	67.75	cp	BRD-K13646352	midostaurin	FLT3 inhibitor		FLT3, KIT, CCNB1, FLT1, KDR, PDGFRB, PRKCA, PRKCG, VEGFA	FLT3 inhibitor, KIT inhibitor, PKC inhibitor
1407	67.7	cp	BRD-A94756469	digoxin	ATPase inhibitor		ATP1A1, ABCB1, RORC, SLCO1B3	ATPase inhibitor
1409	67.69	cp	BRD-K55127134	fluphenazine	Dopamine receptor antagonist		DRD2, DRD1, CALM1, CHRNA7, DRD5, HRH1, HTR2A, HTR6, HTR7	Dopamine receptor antagonist
1412	67.62	cp	BRD-K59633790	VU-0420363-1	SARS coronavirus 3C-like protease inhibitor			SARS coronavirus 3C-like protease inhibitor
1416	67.45	cp	BRD-K09186807	KIN001-244	Phosphoinositide dependent kinase inhibitor		PDPK1	Phosphoinositide dependent kinase inhibitor
1418	67.35	cp	BRD-K05181463	L-741626	Dopamine receptor antagonist		DRD2, DRD3, DRD4, HTR2A, HTR2B	Dopamine receptor antagonist
1421	67.18	cp	BRD-K23369905	oxiconazole	Bacterial cell wall synthesis inhibitor			Bacterial cell wall synthesis inhibitor
1423	67.07	cp	BRD-K28907958	CD-437	Retinoid receptor agonist		RARG	Retinoid receptor agonist
1428	67	cp	BRD-A28105619	cucurbitacin-i	JAK inhibitor		JAK2, STAT3	JAK inhibitor, Lipocortin synthesis stimulant, STAT inhibitor
1431	66.75	cp	BRD-A93236127	digitoxin	ATPase inhibitor		ATP1A1	ATPase inhibitor
1441	66.3	cp	BRD-K43149758	myricetin	Androgen receptor agonist		PIK3CG, AR, CYP3A4	Androgen receptor agonist, Cytochrome P450 inhibitor
1446	66.14	cp	BRD-K19295594	gossypol	BCL inhibitor		BCL2, BCL2L1, MCL1, BCL2L2, CTGF, EGF	BCL inhibitor, MCL1 inhibitor
1447	66.09	cp	BRD-K86595100	chlordiazepoxide	Benzodiazepine receptor agonist		GABRA1, GABRA2, GABRA3, GABRA4, GABRA5, GABRA6, GABRB1, GABRB2, GABRB3, GABRD, GABRE, GABRG1, GABRG2, GABRG3, GABRP, GABRQ	Benzodiazepine receptor agonist
1450	66.03	cp	BRD-A38898897	GW-311616	Leukocyte elastase inhibitor		ELANE	Leukocyte elastase inhibitor
1453	65.96	cp	BRD-A69636825	diltiazem	Calcium channel blocker		CACNA1C, CACNA1S, CACNA2D1, CACNG1, CYP3A5, CYP3A7, HTR3A, KCNA5	Calcium channel blocker
1456	65.85	cp	BRD-K32744045	disulfiram	Aldehyde dehydrogenase inhibitor		ALDH2, ALDH1A2, ALDH5A1, ALDH7A1, CYP2E1, DBH, DNMT1, TRPA1	Aldehyde dehydrogenase inhibitor, TRPV agonist, DNA methyltransferase inhibitor
1459	65.79	cp	BRD-K60274257	dephostatin	Tyrosine phosphatase inhibitor		PTPN1, PTPN6	Tyrosine phosphatase inhibitor
1460	65.77	cp	BRD-K04546108	JAK3-inhibitor-VI	JAK inhibitor		JAK3	JAK inhibitor
1464	65.6	cp	BRD-K92726801	hydrastinine	Haemostatic agent			Haemostatic agent
1469	65.47	cp	BRD-K63165456	norcyclobenzaprine	Adrenergic receptor agonist		HTR2A	Adrenergic receptor agonist, Serotonin receptor antagonist
1472	65.38	cp	BRD-K16485616	mocetinostat	HDAC inhibitor		HDAC1, HDAC2, HDAC3, HDAC11	HDAC inhibitor
1474	65.23	cp	BRD-K47780086	penciclovir	DNA directed DNA polymerase inhibitor			DNA directed DNA polymerase inhibitor
1479	65.13	cp	BRD-K15409150	penfluridol	T-type calcium channel blocker		CACNA1G, DRD1, DRD2	T-type calcium channel blocker
1483	65.08	cp	BRD-K76810206	nicergoline	Adrenergic receptor antagonist		ADRA1A	Adrenergic receptor antagonist
1497	64.63	cp	BRD-K33226500	indinavir	HIV protease inhibitor		CYP3A5	HIV protease inhibitor
1499	64.41	cp	BRD-K74765201	tomelukast	Leukotriene receptor antagonist		CYSLTR1	Leukotriene receptor antagonist
1507	64.15	cp	BRD-K19416115	sitagliptin	Dipeptidyl peptidase inhibitor		DPP4, CYP2C8, FASLG, HMGCR, SLC22A8	Dipeptidyl peptidase inhibitor
1511	64.02	cp	BRD-A87848830	bimatoprost	Prostanoid receptor agonist		PTGFR, AKR1C3, PTGER1, PTGER3	Prostanoid receptor agonist
1513	63.98	cp	BRD-K62965247	tipifarnib-P2	farnesyltransferase inhibitor		FNTA, FNTB	farnesyltransferase inhibitor
1515	63.75	cp	BRD-A01320529	salmeterol	Adrenergic receptor agonist		ADRB2	Adrenergic receptor agonist
1519	63.57	cp	BRD-K19533706	tranilast	Angiogenesis inhibitor		HPGDS, HRH1, IDO1, IFNG, IL10, IL2, IL4, SLC22A12, TGFB1, TNF, TRPV2	Angiogenesis inhibitor
1525	63.32	cp	BRD-A71459254	cymarin	ATPase inhibitor		ATP1A1	ATPase inhibitor
1542	62.77	cp	BRD-K72420232	WZ-4002	EGFR inhibitor		EGFR, ERBB2	EGFR inhibitor
1543	62.74	cp	BRD-K53737926	amitriptyline	Norepinephrine inhibitor		CHRM1, CHRM2, CHRM3, CHRM4, CHRM5, HRH1, HTR6, SLC6A2, SLC6A4, ADRA1A, ADRA1B, ADRA1D, ADRA2A, ADRB1, ADRB2, ADRB3, HRH2, HRH4, HTR1A, HTR1B, HTR1D, HTR2A, HTR2C, HTR7, KCNA1, KCND2, KCND3, KCNQ2, KCNQ3, NTRK1, NTRK2, OPRD1, OPRK1, OPRM1, SIGMAR1	Norepinephrine inhibitor, Norepinephrine reuptake inhibitor, Serotonin receptor antagonist, Serotonin reuptake inhibitor
1545	62.64	cp	BRD-K04887706	AKT-inhibitor-1-2	AKT inhibitor		AKT1, AKT2, AKT3	AKT inhibitor
1548	62.48	cp	BRD-K56558538	ambroxol	Sodium channel blocker		GBA	Sodium channel blocker
1549	62.48	cp	BRD-K35498378	alrestatin	Aldose reductase inhibitor		AKR1B1	Aldose reductase inhibitor
1554	62.31	cp	BRD-A41692738	TGX-221	PI3K inhibitor		PIK3CB, PIK3CD	PI3K inhibitor
1558	62.18	cp	BRD-A55416093	colforsin	Adenylyl cyclase activator		ADCY2, ADCY5, GNAS	Adenylyl cyclase activator, Adenylate cyclase stimulant
1559	62.17	cp	BRD-K59753975	vindesine	Tubulin inhibitor		TUBB, TUBB1	Tubulin inhibitor
1561	62.08	cp	BRD-K37561857	zardaverine	Phosphodiesterase inhibitor		PDE4D, PDE3A, PDE4A, PDE4B, PDE4C	Phosphodiesterase inhibitor
1565	62	cp	BRD-K50720187	flupirtine	Glutamate receptor antagonist		KCNQ2, ADRA2A, KCNQ1, KCNQ3	Glutamate receptor antagonist
1569	61.88	cp	BRD-K56334280	amonafide	Topoisomerase inhibitor		TOP2A, TOP2B	Topoisomerase inhibitor
1570	61.87	cp	BRD-K19894101	MST-312	Telomerase inhibitor		TERT	Telomerase inhibitor
1574	61.81	cp	BRD-K68392338	ZK-93426	Benzodiazepine receptor antagonist		GABRA1, GABRA2, GABRA3, GABRA5	Benzodiazepine receptor antagonist
1580	61.73	cp	BRD-K06750613	GSK-1059615	PI3K inhibitor		PIK3CA, PIK3CG	PI3K inhibitor
1582	61.62	cp	BRD-A70649075	sulconazole	Sterol demethylase inhibitor			Sterol demethylase inhibitor
1584	61.53	cp	BRD-A95939040	sertaconazole	Sterol demethylase inhibitor			Sterol demethylase inhibitor
1585	61.5	cp	BRD-A93206962	L-755507	Adrenergic receptor agonist		ADRB3, ADRB1, ADRB2	Adrenergic receptor agonist
1587	61.48	cp	BRD-K99595596	salsolinol	Monoamine oxidase inhibitor		DRD2	Monoamine oxidase inhibitor, Tyrosine hydroxylase inhibitor
1588	61.47	cp	BRD-K15025317	BAY-11-7821	NFkB pathway inhibitor		RELA	NFkB pathway inhibitor
1590	61.39	cp	BRD-K50836978	purvalanol-a	CDK inhibitor		CDK1, CDK2, CDK4, CDK5, CCND1, CCNE1, CSNK1G3, RPS6KA1, SRC	CDK inhibitor, DYRK inhibitor
1593	61.31	cp	BRD-K49111258	prazosin	Adrenergic receptor antagonist		ADRA1A, ADRA1B, ADRA1D, ADRA2A, ADRA2B, ADRA2C, CDK1, KCNH2, KCNH6, KCNH7	Adrenergic receptor antagonist
1599	61.11	cp	BRD-K77390737	xanthohumol	ATPase inhibitor		CYP19A1, VCP	ATPase inhibitor
1600	61.04	cp	BRD-K74514084	pazopanib	KIT inhibitor		KDR, KIT, FLT1, FLT4, PDGFRB, PDGFRA, BRAF, CSF1R, CYP2B6, CYP2C8, CYP2E1, DDR2, FGF1, FGFR1, FGFR3, ITK, SH2B3	KIT inhibitor, PDGFR receptor inhibitor, VEGFR inhibitor
1620	60.59	cp	BRD-K26979635	NS-3694	Glutamate receptor antagonist		GRIK1	Glutamate receptor antagonist
1623	60.49	cp	BRD-K98490050	amsacrine	Topoisomerase inhibitor		TOP2A, KCNH2	Topoisomerase inhibitor
1624	60.44	cp	BRD-K61314889	IWR-1-ENDO	PARP inhibitor		TNKS, TNKS2	PARP inhibitor
1634	60.16	cp	BRD-A41555725	chlortetracycline	Protein synthesis inhibitor			Protein synthesis inhibitor
1635	60.15	cp	BRD-K52850071	JAK3-Inhibitor-II	JAK inhibitor		EGFR, ALK, JAK1, JAK2, JAK3	JAK inhibitor
1637	60.06	cp	BRD-K55991774	BAS-09104376	HIV integrase inhibitor			HIV integrase inhibitor
1638	60.01	cp	BRD-K01815685	indole	aryl hydrocarbon receptor agonist		AHR, IDO1	aryl hydrocarbon receptor agonist
1640	59.93	cp	BRD-K50464341	berbamine	Calmodulin antagonist		CALM1	Calmodulin antagonist
1641	59.85	cp	BRD-A50675702	fipronil	GABA gated chloride channel blocker			GABA gated chloride channel blocker, Chloride channel blocker
1643	59.83	cp	BRD-K91370081	anisomycin	DNA synthesis inhibitor		NHP2L1, RPL10L, RPL11, RPL13A, RPL15, RPL19, RPL23, RPL23A, RPL26L1, RPL3, RPL37, RPL8, RSL24D1	DNA synthesis inhibitor
1651	59.56	cp	BRD-K72676686	fluvoxamine	Selective serotonin reuptake inhibitor (SSRI)		SLC6A4, CYP2C19	Selective serotonin reuptake inhibitor (SSRI)
1653	59.54	cp	BRD-K44094599	tacrolimus	Calcineurin inhibitor		FKBP1A, CYP3A5, CYP3A7	Calcineurin inhibitor
1654	59.54	cp	BRD-K63606607	bufalin	ATPase inhibitor		ATP1A1	ATPase inhibitor
1665	59.21	cp	BRD-K68191783	ALW-II-38-3	Ephrin inhibitor		DDR1, EPHA2, EPHA4, EPHB2, EPHB4, EPHB6	Ephrin inhibitor
1670	59.01	cp	BRD-A30437061	camptothecin	Topoisomerase inhibitor		TOP1, HIF1A	Topoisomerase inhibitor
1674	58.81	cp	BRD-A64228451	terreic-acid	BTK inhibitor		BTK	BTK inhibitor
1676	58.79	cp	BRD-K95435023	PHA-665752	c-Met inhibitor		MET	c-Met inhibitor
1679	58.75	cp	BRD-K00184207	GR-206	Aryl hydrocarbon receptor ligand			Aryl hydrocarbon receptor ligand
1687	58.52	cp	BRD-K89930444	AG-592	Tyrosine kinase inhibitor			Tyrosine kinase inhibitor
1688	58.51	cp	BRD-M47937986	cefatrizine	Bacterial cell wall synthesis inhibitor			Bacterial cell wall synthesis inhibitor
1691	58.42	cp	BRD-K19352500	prochlorperazine	Dopamine receptor antagonist		DRD2, DRD1, DRD3, DRD4	Dopamine receptor antagonist
1699	58.25	cp	BRD-K99411983	lumicolchicine	Colchicine isomer, non-binder of microtubules			Colchicine isomer, non-binder of microtubules
1705	58	cp	BRD-K06426971	ryuvidine	Histone lysine methyltransferase inhibitor		CDK4, CDK2	Histone lysine methyltransferase inhibitor
1707	57.99	cp	BRD-K10870738	CDC	Lipoxygenase inhibitor		ALOX12, ALOX5	Lipoxygenase inhibitor
1712	57.86	cp	BRD-A22380646	pantoprazole	ATPase inhibitor		ATP4A, CYP2C19, CYP3A4	ATPase inhibitor
1716	57.71	cp	BRD-K14880289	GW-501516	PPAR receptor agonist		PPARD, INS, PPARA	PPAR receptor agonist, Insulin sensitizer
1720	57.65	cp	BRD-K65331431	retinyl	vitamin analog			vitamin analog
1723	57.57	cp	BRD-K18779551	bifemelane	Acetylcholine release stimulant		SLC6A2	Acetylcholine release stimulant, Adrenergic transmitter uptake inhibitor, Reducing agent
1725	57.51	cp	BRD-K40255344	tyrphostin-A9	Protein tyrosine kinase inhibitor			Protein tyrosine kinase inhibitor, Tyrosine kinase inhibitor
1730	57.35	cp	BRD-K30990140	FR-122047	Cyclooxygenase inhibitor			Cyclooxygenase inhibitor
1733	57.23	cp	BRD-K12002134	megestrol	progesterone receptor agonist		PGR	progesterone receptor agonist
1734	57.21	cp	BRD-K22631935	neurodazine	Neurogenesis of non-pluripotent C2C12 myoblast inducer			Neurogenesis of non-pluripotent C2C12 myoblast inducer
1735	57.21	cp	BRD-A75769826	SDM25N	Opioid receptor antagonist		OPRD1	Opioid receptor antagonist
1736	57.2	cp	BRD-A56359832	zileuton	Leukotriene inhibitor		ALOX5	Leukotriene inhibitor, Lipoxygenase inhibitor
1745	57	cp	BRD-A28318179	aminomethyltransferase	Nitric oxide synthase inhibitor		NOS2	Nitric oxide synthase inhibitor
1756	56.49	cp	BRD-K73982490	BI-78D3	JNK inhibitor		MAPK8	JNK inhibitor
1757	56.49	cp	BRD-K29113274	ketoconazole	Sterol demethylase inhibitor		AR, CYP19A1, CYP21A2, CYP2C19, CYP3A5, CYP3A7, KCNA10	Sterol demethylase inhibitor
1759	56.34	cp	BRD-K50891186	GR-103691	Dopamine receptor antagonist			Dopamine receptor antagonist
1761	56.32	cp	BRD-K94441233	mevastatin	HMGCR inhibitor		HMGCR	HMGCR inhibitor
1766	56.24	cp	BRD-K83063356	RS-102895	CCR antagonist		CCR2	CCR antagonist
1767	56.2	cp	BRD-K00610438	altanserin	Serotonin receptor antagonist		HTR2A, HTR2C	Serotonin receptor antagonist
1770	56.13	cp	BRD-K09436313	prostaglandin	Prostanoid receptor antagonist		AKR1C3, PTGDR, PTGDR2, PTGER1, PTGER2, PTGER4, PTGFR	Prostanoid receptor antagonist
1772	56.11	cp	BRD-K92428232	GSK-461364	PLK inhibitor		PLK1	PLK inhibitor
1773	56.07	cp	BRD-K12932420	YM-976	Phosphodiesterase inhibitor		PDE4A, PDE4B, PDE4C, PDE4D, TNF	Phosphodiesterase inhibitor
1775	55.96	cp	BRD-A84189516	baccatin-III	Paclitaxel precursor			Paclitaxel precursor
1784	55.7	cp	BRD-K85090592	pilocarpine	Acetylcholine receptor agonist		CHRM3, CHRM1, CHRM2, CHRM4, CHRM5	Acetylcholine receptor agonist
1785	55.69	cp	BRD-K76133116	benzydamine	Membrane integrity inhibitor		PRSS1, PRSS2	Membrane integrity inhibitor, Prostanoid receptor antagonist, Prostanoid receptor inhibitor
1790	55.56	cp	BRD-K23922020	arecaidine	Acetylcholine receptor agonist		CHRM1, CHRM2, CHRM3, CHRM4	Acetylcholine receptor agonist
1791	55.54	cp	BRD-A69960130	bromocriptine	Dopamine receptor agonist		DRD2, ADRA2A, ADRA2B, ADRA2C, DRD1, DRD3, DRD4, DRD5, HTR1A, HTR1B, HTR1D, HTR2A, HTR2B, HTR2C, ADRA1A, ADRA1B, ADRA1D, HTR6, HTR7, PRL	Dopamine receptor agonist
1793	55.47	cp	BRD-K63874012	thioperamide	Histamine receptor antagonist		HRH3, HRH4	Histamine receptor antagonist
1806	55.17	cp	BRD-K04170657	psoromic-acid	Ras GTPase inhibitor			Ras GTPase inhibitor
1811	55.04	cp	BRD-K79930101	GW-583340	EGFR inhibitor		EGFR, ERBB2	EGFR inhibitor, ErbB2 inhibitor, Receptor tyrosine protein kinase inhibitor
1819	54.77	cp	BRD-A19195498	trimipramine	Norepinephrine reuptake inhibitor		SLC6A2, SLC6A4, SLC6A3, ADRA1A, ADRA1B, ADRA2A, ADRA2B, ADRB1, ADRB2, ADRB3, CHRM1, CHRM2, CHRM3, CHRM4, CHRM5, DRD1, DRD2, DRD5, HRH1, HTR1A, HTR1D, HTR2A, HTR2C, HTR3A	Norepinephrine reuptake inhibitor, Tricyclic antidepressant
1823	54.63	cp	BRD-K34608650	BRD-K34608650	Cannabinoid receptor agonist		CNR2	Cannabinoid receptor agonist
1826	54.6	cp	BRD-K46862739	metyrapone	Cytochrome P450 inhibitor		CYP11B1, HSD11B1, NR3C2	Cytochrome P450 inhibitor
1830	54.54	cp	BRD-A92826379	lupanine	Sodium channel blocker		INS	Sodium channel blocker
1835	54.36	cp	BRD-K29582677	flunarizine	Calcium channel blocker		CACNA1G, CACNA1H, CACNA1I, CALM1, CYP2J2, HRH1	Calcium channel blocker
1844	54	cp	BRD-K39569857	avrainvillamide-analog-3	nucleophosmin inhibitor		NPM1	nucleophosmin inhibitor
1845	53.98	cp	BRD-K16336526	capsaicin	TRPV agonist		TRPV1, CFTR, ENOX2	TRPV agonist
1846	53.98	cp	BRD-K02992638	lamivudine	Nucleoside reverse transcriptase inhibitor			Nucleoside reverse transcriptase inhibitor
1851	53.92	cp	BRD-K61097567	SB-218795	Tachykinin antagonist		TACR3	Tachykinin antagonist
1853	53.83	cp	BRD-K74141488	naftifine	Fungal squalene epoxidase inhibitor		SQLE	Fungal squalene epoxidase inhibitor
1854	53.75	cp	BRD-K91696562	orantinib	FGFR inhibitor		PDGFRB, AURKA, AURKB, KDR, EGFR, FGFR1, FGFR2, PDGFRA, TBK1	FGFR inhibitor, VEGFR inhibitor, PDGFR receptor inhibitor
1863	53.57	cp	BRD-K72816382	cinalukast	Leukotriene receptor antagonist		CYSLTR1	Leukotriene receptor antagonist
1869	53.38	cp	BRD-A34205397	suloctidil	Adrenergic receptor antagonist			Adrenergic receptor antagonist
1872	53.33	cp	BRD-A00267231	hemado	Adenosine receptor agonist		ADORA3, ADORA1, ADORA2A, ADORA2B	Adenosine receptor agonist
1875	53.3	cp	BRD-A32164164	methyllycaconitine	Acetylcholine receptor antagonist		CHRNA7	Acetylcholine receptor antagonist
1878	53.14	cp	BRD-K61480498	epoxycholesterol	LXR agonist		NR1H2, NR1H3	LXR agonist
1880	53.12	cp	BRD-K86301799	dipyridamole	Phosphodiesterase inhibitor		ADA, PDE5A, PDE10A, PDE4A, PDE7B, PDE8A, PDE8B, SLC29A1	Phosphodiesterase inhibitor
1881	53.11	cp	BRD-K73397362	purmorphamine	Smoothened receptor agonist		SMO, DHH, IHH, PTCH1	Smoothened receptor agonist
1884	53.04	cp	BRD-A23359898	sibutramine	Serotonin reuptake inhibitor		SLC6A2, SLC6A4, SLC6A3, CYP2B6, CYP2C19, CYP3A5	Serotonin reuptake inhibitor
1890	52.94	cp	BRD-K89046952	ciclacillin	Bacterial cell wall synthesis inhibitor			Bacterial cell wall synthesis inhibitor
1896	52.81	cp	BRD-K35960502	niclosamide	DNA replication inhibitor		STAT3	DNA replication inhibitor, STAT inhibitor
1899	52.76	cp	BRD-K37080523	isoreserpine	Vesicular monoamine transporter inhibitor		SLC18A2, SLC18A1, SIAH1	Vesicular monoamine transporter inhibitor
1901	52.72	cp	BRD-K16554956	PTB1	AMPK activator		PTPN1	AMPK activator
1903	52.7	cp	BRD-K88701661	dimercaptosuccinic-acid	Chelating agent		DNMT1	Chelating agent
1905	52.65	cp	BRD-A88774919	doxycycline	Bacterial 30S ribosomal subunit inhibitor		MMP8, MMP1	Bacterial 30S ribosomal subunit inhibitor, Metalloproteinase inhibitor
1911	52.51	cp	BRD-K63828191	raloxifene	Estrogen receptor antagonist		ESR1, ESR2, ACVRL1, ENG	Estrogen receptor antagonist, Selective estrogen receptor modulator (SERM)
1914	52.38	cp	BRD-A85860691	chaetocin	Histone lysine methyltransferase inhibitor		EHMT2, SUV39H1	Histone lysine methyltransferase inhibitor
1938	51.72	cp	BRD-K82143716	flucytosine	Antifungal		DNMT1	Antifungal
1945	51.52	cp	BRD-K20285085	fostamatinib	SYK inhibitor		SYK, FLT3, RET	SYK inhibitor
1946	51.49	cp	BRD-A15914070	4-hydroxy-2-nonenal	Cytotoxic lipid peroxidation product		IKBKB	Cytotoxic lipid peroxidation product
1954	51.36	cp	BRD-K38305202	domperidone	Dopamine receptor antagonist		DRD2, DRD3, ABCG2, CYP3A5	Dopamine receptor antagonist
1958	51.31	cp	BRD-A65145453	ATPA	Glutamate receptor agonist		GRIK1, GRIA2	Glutamate receptor agonist
1961	51.17	cp	BRD-K25079130	avrainvillamide-analog-4	nucleophosmin inhibitor		NPM1	nucleophosmin inhibitor
1963	51.08	cp	BRD-K98521173	desoxycortone	Mineralocorticoid receptor agonist		NR3C1, NR3C2	Mineralocorticoid receptor agonist
1966	51.01	cp	BRD-A15435692	BMY-14802	Sigma receptor antagonist		HTR1A, SIGMAR1	Sigma receptor antagonist
1968	50.98	cp	BRD-K26801045	pipamperone	Dopamine receptor antagonist		DRD2, HTR2A, HRH1, HTR1A, HTR1B, HTR1D	Dopamine receptor antagonist
1973	50.75	cp	BRD-A22769835	homochlorcyclizine	Antihistamine		HRH1	Antihistamine
1975	50.73	cp	BRD-K88625236	nonoxynol-9	Membrane integrity inhibitor			Membrane integrity inhibitor
1976	50.71	cp	BRD-K99749624	linifanib	PDGFR receptor inhibitor		CSF1R, KDR, PDGFRB, FLT1, FLT3, FLT4, CSF1, KIT, PDGFRA, RET, TEK	PDGFR receptor inhibitor, VEGFR inhibitor
1977	50.68	cp	BRD-K99451608	lopinavir	HIV protease inhibitor			HIV protease inhibitor
1978	50.68	cp	BRD-K43164539	cholic-acid	Bile acid		CES1, FECH, PLA2G1B, ADH1C, COX4I1, COX5A, COX5B, COX6A2, COX6B1, COX6C, COX7A1, COX7B, COX7C, COX8A, ESRRG, FABP6, GPBAR1, MT-CO1, MT-CO2, MT-CO3	Bile acid
1980	50.67	cp	BRD-K83988098	alvespimycin	HSP inhibitor		HSP90AA1	HSP inhibitor
1988	50.41	cp	BRD-A34208323	VU-0404997-2	Glutamate receptor modulator		GRM4	Glutamate receptor modulator
1992	50.34	cp	BRD-K82484965	carmoxirole	Dopamine receptor agonist		DRD2	Dopamine receptor agonist
1997	50.27	cp	BRD-K20920669	cromoglicic-acid	Immunosuppressant		KCNMA1, S100P	Immunosuppressant
1998	50.26	cp	BRD-A02481876	importazole	Importin-beta transport receptor inhibitor		KPNB1	Importin-beta transport receptor inhibitor
2003	50.18	cp	BRD-A58564983	selamectin	Nematocide			Nematocide
2008	50.05	cp	BRD-K32247306	primidone	GABA receptor antagonist		GABRA1, CHRNA4, CHRNA7, GABRA2, GABRA3, GABRA4, GABRA5, GABRA6, GABRB1, GABRB2, GABRB3, GABRD, GABRE, GABRG1, GABRG2, GABRG3, GABRP, GABRQ, GRIA2, GRIK2	GABA receptor antagonist
2010	50.02	cp	BRD-K91900765	VX-745	p38 MAPK inhibitor		MAPK14, MAPK11, MAPK12	p38 MAPK inhibitor
2012	49.97	cp	BRD-K80527266	triacsin-c	Adrenergic receptor antagonist		ACSL1	Adrenergic receptor antagonist
2015	49.93	cp	BRD-A01593789	chlormadinone	5-alpha reductase inhibitor		PGR	5-alpha reductase inhibitor, Progesterone receptor agonist
2021	49.64	cp	BRD-A41250306	cyclopenthiazide	Thiazide diuretic			Thiazide diuretic
2023	49.57	cp	BRD-K17306061	aprepitant	Tachykinin antagonist		TACR1, CYP2C19	Tachykinin antagonist
2024	49.52	cp	BRD-K14767410	SC-560	Cyclooxygenase inhibitor		PTGS1	Cyclooxygenase inhibitor
2026	49.51	cp	BRD-K89732114	trifluoperazine	Dopamine receptor antagonist		DRD2, ABCG2, ADRA1A, CALM1, CALY, CAMK2A, DRD4, HRH1, HTR2A, HTR2C, S100A4, SCN4A, SCN9A, TNNC1	Dopamine receptor antagonist
2035	49.32	cp	BRD-A71765365	mepireserpate	Catecholamine depleting sympatholytic		SLC18A2, SLC18A1	Catecholamine depleting sympatholytic
2041	49.22	cp	BRD-K93331255	lypressin	Vasopressin receptor agonist		AVPR1A, AVPR1B, AVPR2	Vasopressin receptor agonist
2047	49	cp	BRD-K41567364	SB-334867	Orexin receptor antagonist		HCRTR1, HCRTR2	Orexin receptor antagonist
2048	48.99	cp	BRD-K45068323	W-13	Calmodulin antagonist		CALM1, MYLK, PDE1A	Calmodulin antagonist
2050	48.96	cp	BRD-A34817987	itraconazole	Cytochrome P450 inhibitor		CYP3A5, CYP3A7, CYP51A1, KDR	Cytochrome P450 inhibitor
2051	48.94	cp	BRD-A30655177	LFM-A13	BTK inhibitor		BTK	BTK inhibitor
2055	48.84	cp	BRD-K89348303	ramipril	ACE inhibitor		ACE	ACE inhibitor
2056	48.84	cp	BRD-A25576662	streptozotocin	DNA alkylating agent		SLC2A2	DNA alkylating agent
2058	48.77	cp	BRD-K46384212	o-3M3FBS	phospholipase activator			phospholipase activator
2064	48.67	cp	BRD-K70490179	rimcazole	Sigma receptor antagonist		SIGMAR1	Sigma receptor antagonist
2065	48.67	cp	BRD-K83322645	L-693403	Sigma receptor agonist		DRD2, SIGMAR1	Sigma receptor agonist, Sigma receptor antagonist
2066	48.64	cp	BRD-K00627859	tubastatin-a	HDAC inhibitor		HDAC6	HDAC inhibitor
2068	48.59	cp	BRD-A35033682	eriodictyol	Cytochrome P450 inhibitor		CYP1B1, NFE2L2, XDH	Cytochrome P450 inhibitor
2078	48.28	cp	BRD-K81272440	dantrolene	Calcium channel blocker		RYR1, RYR3	Calcium channel blocker
2079	48.27	cp	BRD-K11107424	tiotidine	Histamine receptor antagonist		HRH2	Histamine receptor antagonist
2080	48.04	cp	BRD-K59037100	oxybenzone	Lipase inhibitor		LIPE	Lipase inhibitor
2085	47.95	cp	BRD-K40990712	hexamethyleneamiloride	Sodium/hydrogen antiport inhibitor		GNRHR, ADRA2A, GNRH1, PLAU, SLC9A1	Sodium/hydrogen antiport inhibitor
2090	47.77	cp	BRD-A36707673	hydroxycholesterol	LXR agonist		ABCA1, NR1H2, NR1H3	LXR agonist
2107	47.31	cp	BRD-K33551950	radicicol	HSP inhibitor		ACLY, DLAT, HSP90AB1, HSP90B1, MAP3K7, OPRM1, PDK3	HSP inhibitor
2120	47.01	cp	BRD-K83636919	entacapone	Catechol O methyltransferase inhibitor		COMT	Catechol O methyltransferase inhibitor
2122	46.97	cp	BRD-A90799790	isradipine	Calcium channel blocker		CACNA1C, CACNA1D, CACNA2D1, CACNA1F, CACNA1H, CACNA1S, CACNA2D2, CACNB2	Calcium channel blocker
2123	46.95	cp	BRD-K52930707	rescinnamine	ACE inhibitor		ACE	ACE inhibitor
2142	46.47	cp	BRD-K09631521	thiotepa	Cytochrome P450 inhibitor		CYP2B6	Cytochrome P450 inhibitor
2161	45.9	cp	BRD-K13664374	dichloroacetic-acid	Pyruvate dehydrogenase kinase inhibitor		PDK1	Pyruvate dehydrogenase kinase inhibitor
2165	45.79	cp	BRD-A43974499	reboxetine	Adrenergic receptor antagonist		SLC6A2	Adrenergic receptor antagonist
2166	45.77	cp	BRD-K39746403	erythromycin	NFkB pathway inhibitor		CYP3A4, MLNR	NFkB pathway inhibitor
2174	45.42	cp	BRD-K08806317	timolol	Adrenergic receptor antagonist		ADRB2, ADRB1	Adrenergic receptor antagonist
2179	45.27	cp	BRD-K63979671	etifenin	Compound used in hepatobiliary scans of the liver			Compound used in hepatobiliary scans of the liver
2181	45.18	cp	BRD-K10466330	AVA	Nucleophosmin inhibitor			Nucleophosmin inhibitor
2182	45.18	cp	BRD-A44551378	LFM-A12	EGFR inhibitor		EGFR	EGFR inhibitor
2186	45.08	cp	BRD-M00539986	formoterol	Adrenergic receptor agonist		ADRB2, CYP2C19	Adrenergic receptor agonist
2188	45.06	cp	BRD-K14550461	doxercalciferol	Vitamin D receptor agonist		VDR	Vitamin D receptor agonist
2191	44.94	cp	BRD-K31699485	DMEOB	glutamate receptor modulator			glutamate receptor modulator
2192	44.91	cp	BRD-K70914287	BIBX-1382	EGFR inhibitor		EGFR, ERBB2	EGFR inhibitor, Tyrosine kinase inhibitor
2194	44.89	cp	BRD-K59419204	AM-281	Cannabinoid receptor antagonist		CNR1, CNR2, GPR55	Cannabinoid receptor antagonist
2197	44.86	cp	BRD-K90885812	propantheline	Acetylcholine receptor antagonist		CHRM1, CHRM2, CHRM3, CHRM4	Acetylcholine receptor antagonist
2199	44.83	cp	BRD-A80502530	cinobufagin	ATPase inhibitor		ATP1A1, ATP1A2, ATP1A3, ATP1A4, ATP1B1, ATP1B2, ATP1B3, ATP1B4, FXYD2	ATPase inhibitor
2204	44.67	cp	BRD-K34170797	fexaramine	FXR agonist		NR1H4	FXR agonist
2208	44.47	cp	BRD-K68437527	EMF-bca1-60	caspase inhibitor			caspase inhibitor
2209	44.39	cp	BRD-A29260609	acebutolol	Adrenergic receptor antagonist		ADRB1, ADRB2	Adrenergic receptor antagonist
2219	44.01	cp	BRD-K53263234	CITCO	CAR agonist		NR1I3	CAR agonist
2223	43.87	cp	BRD-K67298865	SB-431542	TGF beta receptor inhibitor		TGFBR1, ACVR1C, ACVR1B	TGF beta receptor inhibitor
2227	43.82	cp	BRD-K81169441	cerivastatin	HMGCR inhibitor		HMGCR, CYP2C8, CYP3A5	HMGCR inhibitor
2230	43.74	cp	BRD-K53523901	arctigenin	MEK inhibitor		ADIPOR1, AHR, CHUK, MAP2K1	MEK inhibitor
2232	43.72	cp	BRD-A96107863	nisoldipine	Calcium channel blocker		CACNA1C, CACNA1D, CACNA1S, CACNA2D1, CACNB2, CYP3A5	Calcium channel blocker
2234	43.64	cp	BRD-K18678457	ZD-7288	HCN channel blocker		HCN1, HCN2, HCN3, HCN4	HCN channel blocker
2236	43.58	cp	BRD-M45964048	verteporfin	Photosensitizing agent			Photosensitizing agent
2246	43.43	cp	BRD-K84566043	fenpiverinium	Acetylcholine receptor antagonist			Acetylcholine receptor antagonist
2248	43.4	cp	BRD-K43860855	iobenguane	Antineoplastic			Antineoplastic
2250	43.33	cp	BRD-K35531059	molsidomine	Guanylyl cyclase activator		GUCY1A3	Guanylyl cyclase activator
2260	43.12	cp	BRD-A65615053	zacopride	Serotonin receptor antagonist		HTR3A, HTR4, HTR3B, HTR5A	Serotonin receptor antagonist
2266	43.01	cp	BRD-K16233984	eriochrome-black-t	Azo dye			Azo dye
2278	42.68	cp	BRD-K66093087	FGIN-1-43	Benzodiazepine receptor agonist		TSPO	Benzodiazepine receptor agonist
2279	42.6	cp	BRD-A74667430	etodolac	Cyclooxygenase inhibitor		PTGS2, PTGS1, RXRA, TRPV1	Cyclooxygenase inhibitor
2281	42.51	cp	BRD-K32836707	CAY-10577	Casein kinase inhibitor			Casein kinase inhibitor
2282	42.5	cp	BRD-A77299732	salubrinal	Eukaryotic translation initiation factor inhibitor		EIF2S1, SLC6A9	Eukaryotic translation initiation factor inhibitor
2286	42.34	cp	BRD-K07212038	selinidin	Mast cell stabilizer			Mast cell stabilizer
2287	42.33	cp	BRD-K08996725	zolantidine	Histamine receptor antagonist			Histamine receptor antagonist
2291	42.18	cp	BRD-A29289453	PCA-4248	Platelet activating factor receptor antagonist		PTAFR	Platelet activating factor receptor antagonist
2306	41.95	cp	BRD-A59985574	topotecan	Topoisomerase inhibitor		TOP1, TOP1MT	Topoisomerase inhibitor
2308	41.89	cp	BRD-K51018020	VAMA-37	DNA dependent protein kinase inhibitor		PRKDC	DNA dependent protein kinase inhibitor
2318	41.73	cp	BRD-K63089472	farnesylthioacetic-acid	Inhibitor of methyl esterification of farnesylated proteins			Inhibitor of methyl esterification of farnesylated proteins
2321	41.62	cp	BRD-K40578143	GR-79236	Adenosine receptor agonist		ADORA1, ADORA2A	Adenosine receptor agonist
2325	41.54	cp	BRD-K71731651	PNU-120596	Acetylcholine receptor agonist		CHRNA7	Acetylcholine receptor agonist
2326	41.54	cp	BRD-K07220430	cinnarizine	Calcium channel blocker		HRH1, CACNA1C, CACNA1D, CACNA1F, CACNA1G, CACNA1H, CACNA1I, CACNA1S, CHRM1, CHRM2, CHRM3, CHRM4, CHRM5, DRD1, DRD2, DRD5	Calcium channel blocker
2338	41.2	cp	BRD-K66788707	fludarabine	DNA synthesis inhibitor		ADA, DCK, POLA1, RRM1, RRM2	DNA synthesis inhibitor, DNA repair enzyme inhibitor, Purine antagonist
2339	41.16	cp	BRD-K72903603	zidovudine	Reverse transcriptase inhibitor		TERT	Reverse transcriptase inhibitor
2341	41.12	cp	BRD-K51485625	ritonavir	HIV protease inhibitor		CYP3A4, CYP1A2, CYP2B6, CYP2C19, CYP3A5, CYP3A7	HIV protease inhibitor
2346	40.96	cp	BRD-A23637604	oxymetholone	Androgen receptor agonist		AR	Androgen receptor agonist
2348	40.95	cp	BRD-A01295252	trans-7-hydroxy-pipat	Dopamine receptor ligand			Dopamine receptor ligand
2359	40.72	cp	BRD-A62525898	prednisone	Glucocorticoid receptor agonist		NR3C1, HSD11B1	Glucocorticoid receptor agonist
2365	40.52	cp	BRD-K48168960	propylthiouracil	Thyroid peroxidase inhibitor		TPO, DIO1	Thyroid peroxidase inhibitor
2371	40.43	cp	BRD-K48427617	U-0124	MEK inhibitor			MEK inhibitor
2380	40.03	cp	BRD-K57546357	prunetin	Breast cancer resistance protein inhibitor		ABCG2, ALDH2	Breast cancer resistance protein inhibitor
2382	39.96	cp	BRD-A65076780	dihydroergocristine	Adrenergic receptor antagonist		HTR2A, ADRA1A, ADRB1, DRD1, DRD2, DRD3, DRD4, DRD5, HTR1A, HTR3A, HTR4, HTR5A, HTR6, HTR7	Adrenergic receptor antagonist, Prolactin inhibitor
2383	39.95	cp	BRD-A68039575	liquiritigenin	Aromatase inhibitor		CYP19A1	Aromatase inhibitor
2389	39.89	cp	BRD-K91263825	nortriptyline	Tricyclic antidepressant		KCNJ10, SLC6A2, SLC6A4, ADRA1A, ADRA1B, ADRA1D, ADRA2A, ADRA2B, ADRA2C, ADRB1, ADRB2, ADRB3, CHRM1, CHRM2, CHRM3, CHRM4, CHRM5, CYP2C19, DRD2, HRH1, HTR1A, HTR2A, HTR2C, HTR6, PGRMC1, PIK3CD, SIGMAR1	Tricyclic antidepressant
2401	39.65	cp	BRD-A03623303	metoprolol	Adrenergic receptor antagonist		ADRB1, ADRB2	Adrenergic receptor antagonist
2402	39.61	cp	BRD-K16664969	GTP-14564	FLT3 inhibitor		FLT3, CSF1R, KIT, PDGFRB	FLT3 inhibitor, Tyrosine kinase inhibitor
2403	39.59	cp	BRD-K01555864	dibenzoylmethane	Antineoplastic			Antineoplastic
2404	39.58	cp	BRD-K87991767	umbelliferone	Cyclooxygenase inhibitor		CA9, CA12, PTGS2	Cyclooxygenase inhibitor
2407	39.48	cp	BRD-K84595254	strophanthidin	ATPase inhibitor		ATP1A1, ATP1A2, ATP1A3, ATP1A4, ATP1B1, ATP1B2, ATP1B3, ATP1B4, FXYD2	ATPase inhibitor
2408	39.48	cp	BRD-K46424862	hymecromone	Monoamine oxidase inhibitor		MAOA	Monoamine oxidase inhibitor
2410	39.45	cp	BRD-K37991163	paroxetine	Selective serotonin reuptake inhibitor (SSRI)		SLC6A4, CHRM1, CHRM2, CHRM3, CHRM4, CHRM5, HTR2A, SLC6A2	Selective serotonin reuptake inhibitor (SSRI)
2415	39.28	cp	BRD-K14282469	LY-165163	Serotonin receptor antagonist		HTR1A, HTR1D	Serotonin receptor antagonist
2429	39.04	cp	BRD-K66876909	linezolid	Bacterial 50S ribosomal subunit inhibitor		MAOA	Bacterial 50S ribosomal subunit inhibitor
2431	38.98	cp	BRD-K83972459	JWE-035	Aurora kinase inhibitor		AURKA	Aurora kinase inhibitor
2436	38.93	cp	BRD-A17411484	carprofen	Cyclooxygenase inhibitor		PTGS2, PTGS1	Cyclooxygenase inhibitor
2439	38.83	cp	BRD-K55677650	CO-101244	Ionotropic glutamate receptor antagonist		GRIN2B	Ionotropic glutamate receptor antagonist
2442	38.77	cp	BRD-A54029483	IRL-2500	Endothelin receptor antagonist		EDNRB	Endothelin receptor antagonist
2443	38.75	cp	BRD-A09472452	flecainide	Sodium channel blocker		SCN5A, KCNA5, KCNA7, SCN4A	Sodium channel blocker
2445	38.7	cp	BRD-K64402243	ivachtin	Caspase inhibitor		CASP3	Caspase inhibitor
2447	38.64	cp	BRD-A39290993	cyproterone	Androgen receptor antagonist		AR, ADORA1, ESR1	Androgen receptor antagonist, Progesterone receptor agonist, Testosterone receptor antagonist
2450	38.56	cp	BRD-M30523314	vinorelbine	Tubulin inhibitor		TUBB	Tubulin inhibitor
2451	38.53	cp	BRD-K85383046	IAA-94	Chloride channel blocker			Chloride channel blocker
2453	38.45	cp	BRD-K06335600	tizanidine	Adrenergic receptor agonist		ADRA2A, ADRA2B, ADRA2C, CYP1A2, NISCH	Adrenergic receptor agonist
2456	38.42	cp	BRD-K77925998	quipazine	Serotonin receptor agonist		HTR2A, HTR3A, HTR3B, HTR1A, HTR1D, HTR2B, HTR2C, HTR6, SLC6A4	Serotonin receptor agonist
2460	38.3	cp	BRD-K01624546	docosatrienoic-acid	LTB4 inhibitor			LTB4 inhibitor
2463	38.13	cp	BRD-K85985071	ellipticine	Topoisomerase inhibitor		TOP2A, TOP2B	Topoisomerase inhibitor
2468	38	cp	BRD-K40782193	QX-222	Sodium channel blocker			Sodium channel blocker
2471	37.94	cp	BRD-A55393291	testosterone	Androgen receptor agonist		AR, CYP19A1, CYP2C19, CYP2C8, CYP3A5	Androgen receptor agonist
2476	37.81	cp	BRD-K94294671	OSI-027	MTOR inhibitor		MTOR	MTOR inhibitor
2478	37.78	cp	BRD-K61217870	n-(3-acetamidophenyl)-3-chlorobenzamide	Glutamate receptor antagonist		GRM5	Glutamate receptor antagonist
2481	37.73	cp	BRD-K23583188	lavendustin-a	EGFR inhibitor		EGFR, LCK	EGFR inhibitor
2483	37.65	cp	BRD-K25906698	immepip	Histamine receptor agonist		HRH3, HRH4	Histamine receptor agonist
2484	37.63	cp	BRD-K63915849	AS-604850	PI3K inhibitor		PIK3CG, PIK3CA	PI3K inhibitor
2486	37.53	cp	BRD-K88679075	methandriol	Androgenic steroid			Androgenic steroid
2489	37.48	cp	BRD-K94919853	10H-phenothiazin-10-yl)(p-tolyl)methanone	Butyrylcholinesterase inhibitor		BCHE	Butyrylcholinesterase inhibitor
2492	37.43	cp	BRD-A60197193	amisulpride	Dopamine receptor antagonist		DRD2, DRD3, HTR2A, HTR7	Dopamine receptor antagonist
2493	37.42	cp	BRD-K72093121	vidarabine	Antiviral		ADCY5	Antiviral
2495	37.39	cp	BRD-A67862938	naftidrofuryl	Adrenergic receptor antagonist			Adrenergic receptor antagonist
2496	37.34	cp	BRD-K63150726	JTE-907	Cannabinoid receptor inverse agonist		CNR2	Cannabinoid receptor inverse agonist
2498	37.3	cp	BRD-K43764301	dexketoprofen	Cyclooxygenase inhibitor		CXCR1, PTGS1, PTGS2, SLC5A8	Cyclooxygenase inhibitor
2512	36.97	cp	BRD-K08417745	SID-26681509	Cathepsin inhibitor		CTSL	Cathepsin inhibitor
2514	36.93	cp	BRD-K93332168	isocarboxazid	Monoamine oxidase inhibitor		MAOA, MAOB	Monoamine oxidase inhibitor
2518	36.83	cp	BRD-A35989968	megestrol	Progesterone receptor agonist		PGR	Progesterone receptor agonist
2519	36.82	cp	BRD-A84493640	atovaquone	Mitochondrial electron transport inhibitor		DHODH	Mitochondrial electron transport inhibitor
2522	36.74	cp	BRD-U08759356	EI-346-erlotinib-analog	EGFR inhibitor		EGFR	EGFR inhibitor
2528	36.65	cp	BRD-K04111260	raclopride	Dopamine receptor antagonist		DRD2, DRD3, HTR1A	Dopamine receptor antagonist
2532	36.6	cp	BRD-A26097136	bulleyaconitine-a	Non-opiod analgesic			Non-opiod analgesic
2534	36.59	cp	BRD-K03670461	tyrphostin-AG-82	EGFR inhibitor		EGFR, LCK	EGFR inhibitor
2541	36.3	cp	BRD-A97104540	fenoterol	Adrenergic receptor agonist		ADRB2, ADRB1, ADRB3	Adrenergic receptor agonist
2551	36.01	cp	BRD-K64052750	gefitinib	EGFR inhibitor		EGFR, CYP2C19	EGFR inhibitor
2556	35.89	cp	BRD-K90789829	nefazodone	Adrenergic inhibitor		HTR2A, SLC6A4, HTR2C, SLC6A2, ADRA1A, ADRA1B, ADRA2A, CYP3A4, CYP3A5, CYP3A7, HTR1A, SLC6A3	Adrenergic inhibitor, Norepinephrine reuptake inhibitor, Serotonin receptor antagonist, Serotonin reuptake inhibitor
2558	35.81	cp	BRD-K09635134	l-erythro-MAPP	negative control for D-erythro-MAPP			negative control for D-erythro-MAPP
2563	35.7	cp	BRD-A80383043	BRD-A80383043	Glutamate receptor agonist		GRM1, GRM2	Glutamate receptor agonist, Glutamate receptor antagonist
2564	35.68	cp	BRD-A91555231	norepinephrine	Adrenergic receptor agonist		ADRA1A, ADRA1B, ADRA1D, ADRA2A, ADRA2B, ADRA2C, ADRB1, ADRB3, ADRB2, DRD1, DRD5, PAH, SLC18A1, SLC18A2	Adrenergic receptor agonist
2566	35.59	cp	BRD-K94270326	ecopipam	Dopamine receptor antagonist		DRD1, DRD5, DRD2	Dopamine receptor antagonist
2569	35.46	cp	BRD-K06980535	promazine	Dopamine receptor antagonist		CHRM5, DRD2, ADRA1A, ADRA1B, ADRA1D, CHRM1, CHRM2, CHRM3, CHRM4, DRD1, DRD3, DRD4, HRH1, HTR2A, HTR2C	Dopamine receptor antagonist
2573	35.37	cp	BRD-K04196797	oxcarbazepine	Sodium channel blocker		CYP2C19, CYP3A4, CYP3A5, SCN1A, SCN3A, SCN5A	Sodium channel blocker
2574	35.35	cp	BRD-K26373640	IKK-2-inhibitor	IKK inhibitor		IKBKB	IKK inhibitor, SYK inhibitor
2575	35.3	cp	BRD-K33818169	GW-3965	LXR agonist		NR1H2, NR1H3, ABCA1	LXR agonist, ABC transporter expression enhancer
2578	35.19	cp	BRD-K32584078	BML-257	AKT inhibitor		AKT1	AKT inhibitor, HCV inhibitor
2579	35.19	cp	BRD-K68507560	dicycloverine	Acetylcholine receptor antagonist		CHRM1, CHRM2, CHRM3	Acetylcholine receptor antagonist
2581	35.09	cp	BRD-K06926592	tretinoin	Retinoid receptor agonist		RARG, RORB, ALDH1A1, ALDH1A2, GPRC5A, NR0B1, NR2C2, PPARD, RARA, RARB, RARRES1, RORC, RXRB, RXRG	Retinoid receptor agonist, Retinoid receptor ligand
2582	35.07	cp	BRD-K89162000	tandutinib	FLT3 inhibitor		FLT3, KIT, PDGFRA, PDGFRB, CSF1R, PDGFD	FLT3 inhibitor, KIT inhibitor, PDGFR receptor inhibitor
2586	34.97	cp	BRD-K55703048	latrepirdine	Glutamate receptor antagonist		HTR6, GRIN2B, HRH1	Glutamate receptor antagonist
2590	34.89	cp	BRD-A75478957	PD-166793	Metalloproteinase inhibitor		MMP13, MMP2, MMP3	Metalloproteinase inhibitor, Collagenase inhibitor
2595	34.78	cp	BRD-A33711280	metixene	Acetylcholine receptor antagonist		CHRM5, CHRM1, CHRM2, CHRM3, CHRM4	Acetylcholine receptor antagonist
2601	34.71	cp	BRD-K10065684	dantron	Laxative			Laxative
2605	34.61	cp	BRD-A02367930	ethinyl-estradiol	DNA directed DNA polymerase stimulant		CYP2C8, ESR1, ESR2, NR1I2	DNA directed DNA polymerase stimulant, Estrogenic component in oral contraceptives, Estrogen receptor agonist
2610	34.51	cp	BRD-K44442813	pidotimod	Interferon receptor agonist			Interferon receptor agonist, Interleukin receptor agonist
2613	34.4	cp	BRD-K54094468	remoxipride	Dopamine receptor antagonist		DRD2, DRD3, DRD4, HTR2A, SIGMAR1	Dopamine receptor antagonist
2616	34.3	cp	BRD-K05464208	JX-401	p38 MAPK inhibitor		MAPK14	p38 MAPK inhibitor
2621	34.19	cp	BRD-K13571841	pepstatin	Aspartic protease inhibitor		CTSB, CTSD, CTSL, REN	Aspartic protease inhibitor
2624	34.13	cp	BRD-K40624912	ZM-39923	JAK inhibitor		JAK1, JAK3	JAK inhibitor
2641	33.67	cp	BRD-K97365803	PI-828	PI3K inhibitor			PI3K inhibitor
2643	33.58	cp	BRD-K50214219	CS-1657	PARP inhibitor		PARP1	PARP inhibitor
2645	33.53	cp	BRD-K92984783	melperone	Serotonin receptor antagonist		DRD2, HTR1A, HTR2A	Serotonin receptor antagonist, Dopamine receptor antagonist
2646	33.52	cp	BRD-K37618799	MRS-1220	Adenosine receptor antagonist		ADORA2B, ADORA3	Adenosine receptor antagonist
2650	33.33	cp	BRD-K33860217	CP-94253	Serotonin receptor agonist		HTR1B	Serotonin receptor agonist
2651	33.32	cp	BRD-K54529596	captopril	ACE inhibitor		ACE, LTA4H, MMP2, MMP9	ACE inhibitor
2661	33	cp	BRD-K82216340	medroxyprogesterone	progesterone receptor agonist		PGR, ESR1	progesterone receptor agonist
2663	32.97	cp	BRD-K85119730	tolbutamide	ATP channel blocker		ABCC8, CYP2B6, CYP2C19, CYP2C8, KCNJ1, KCNJ11, KCNJ8	ATP channel blocker
2664	32.95	cp	BRD-K29313308	HDAC3-selective	HDAC inhibitor		HDAC3	HDAC inhibitor
2665	32.94	cp	BRD-A47513740	calyculin	Protein phosphatase inhibitor		PPP1CA, PPP1CC, PPP2CA	Protein phosphatase inhibitor
2667	32.91	cp	BRD-A41941932	vitexin	Antioxidant			Antioxidant
2670	32.84	cp	BRD-K69688083	mestinon	Cholinesterase inhibitor		ACHE, BCHE	Cholinesterase inhibitor
2672	32.79	cp	BRD-A33833419	TER-14687	Inhibitor of translocation of PKCq in T cells		PRKCQ	Inhibitor of translocation of PKCq in T cells
2677	32.61	cp	BRD-K93176058	AC-55649	Retinoid receptor agonist		RARB, RARA	Retinoid receptor agonist
2688	32.34	cp	BRD-K11540476	EMF-BCA1-64	Caspase inhibitor		CASP3	Caspase inhibitor
2702	32.02	cp	BRD-K06854232	AM-580	Retinoid receptor agonist		RARA	Retinoid receptor agonist
2708	31.89	cp	BRD-K43068349	AMG-9810	TRPV antagonist		TRPV1	TRPV antagonist
2713	31.81	cp	BRD-K50325075	UCL-2077	Slow after hyperpolarization channel blocker			Slow after hyperpolarization channel blocker
2716	31.79	cp	BRD-K32311154	nifekalant	Potassium channel blocker			Potassium channel blocker
2721	31.65	cp	BRD-K45542189	diethylcarbamazine	Lipoxygenase inhibitor		ALOX5, PTGS1	Lipoxygenase inhibitor
2722	31.6	cp	BRD-A67799922	phenoxybenzamine	Adrenergic receptor antagonist		ADRA2B, ADRA1A, ADRA1B, ADRA1D, ADRA2A, ADRA2C, ADRB2, CALM1	Adrenergic receptor antagonist
2726	31.49	cp	BRD-K41731458	triclosan	Enoyl-[acyl-carrier-protein] reductase [NADH] inhibitor		DNMT1	Enoyl-[acyl-carrier-protein] reductase [NADH] inhibitor
2738	31.28	cp	BRD-K76568384	PHTPP	Estrogen receptor antagonist		ESR2	Estrogen receptor antagonist
2741	31.19	cp	BRD-K46441700	GR-55562	Serotonin receptor antagonist		HTR1B, HTR1D	Serotonin receptor antagonist
2742	31.17	cp	BRD-K94689771	pinocembrin	CYP1B1 inhibitor		AR, CYP1B1, SRD5A1, SRD5A2	CYP1B1 inhibitor
2750	31	cp	BRD-K11663430	pyroxamide	HDAC inhibitor		HDAC1	HDAC inhibitor
2752	30.96	cp	BRD-K87932577	CDK1-5-inhibitor	CDK inhibitor		CDK1, CDK5, GSK3B	CDK inhibitor, Glycogen synthase kinase inhibitor
2755	30.94	cp	BRD-K40227168	vinburnine	Adrenergic receptor antagonist		CHRM1, CHRM2, CHRM3, CHRM4	Adrenergic receptor antagonist
2758	30.87	cp	BRD-K63195589	tipifarnib	Farnesyltransferase inhibitor		FNTA, FNTB	Farnesyltransferase inhibitor
2764	30.72	cp	BRD-K73391359	quinisocaine	Local anesthetic			Local anesthetic
2766	30.69	cp	BRD-K14993104	bemegride	Chemoreceptor agonist		GABRA1	Chemoreceptor agonist
2767	30.67	cp	BRD-K74133369	oligomycin-a	ATP synthase inhibitor		ATP5A1	ATP synthase inhibitor, ATPase inhibitor
2769	30.65	cp	BRD-K11399644	phenformin	AMPK activator		KCNJ8, PRKAA1	AMPK activator
2773	30.59	cp	BRD-K67080878	milrinone	Phosphodiesterase inhibitor		PDE3A, PDE2A, PDE3B, PDE5A	Phosphodiesterase inhibitor
2775	30.36	cp	BRD-K02227374	milnacipran	Serotonin reuptake inhibitor		SLC6A2, SLC6A4, GRIN1, GRIN2A, GRIN2B, GRIN2C, GRIN2D, GRIN3A, GRIN3B	Serotonin reuptake inhibitor
2776	30.35	cp	BRD-K54708045	nTZDpa	PPAR receptor agonist		PPARG	PPAR receptor agonist
2785	30.24	cp	BRD-K30020243	aliskiren	Antihypertensive		REN	Antihypertensive, Peptidase inhibitor, Protease inhibitor, Renin inhibitor
2788	30.21	cp	BRD-K38251852	paxilline	Potassium channel blocker		ABCA1, KCNMA1, NR1H3	Potassium channel blocker
2794	30.04	cp	BRD-A89337244	PD-102807	Acetylcholine receptor antagonist		CHRM4	Acetylcholine receptor antagonist
2796	30	cp	BRD-A29901043	KIN001-127	ITK inhibitor		ITK	ITK inhibitor
2797	29.99	cp	BRD-A75552914	isoxicam	Cyclooxygenase inhibitor		PTGS1, PTGS2	Cyclooxygenase inhibitor
2800	29.94	cp	BRD-A03359064	ICI-89406	Adrenergic receptor antagonist		ADRB1, ADRB2	Adrenergic receptor antagonist
2807	29.85	cp	BRD-A10523515	GSK-429286A	Rho associated kinase inhibitor		ROCK1	Rho associated kinase inhibitor
2813	29.7	cp	BRD-K78637815	LY-320135	Cannabinoid receptor antagonist		CNR1	Cannabinoid receptor antagonist
2817	29.69	cp	BRD-A26384407	chlortalidone	Carbonic anhydrase inhibitor		CA7, CA1, CA12, CA14, CA4, SLC12A1	Carbonic anhydrase inhibitor
2818	29.67	cp	BRD-A09062839	amylocaine	Local anesthetic			Local anesthetic
2827	29.54	cp	BRD-K46142322	RS-67333	Serotonin receptor partial agonist		HTR4	Serotonin receptor partial agonist
2828	29.53	cp	BRD-K63533170	AM-630	Cannabinoid receptor antagonist		CNR2, CNR1	Cannabinoid receptor antagonist
2830	29.51	cp	BRD-K51302260	KU-C103871	GSP agonist		SMAD3	GSP agonist
2842	29.26	cp	BRD-K00234327	RU-24969	Serotonin receptor agonist		HTR1A, HTR1B, HTR6, HTR1D, HTR2A, HTR2B, HTR2C, HTR5A	Serotonin receptor agonist
2847	29.09	cp	BRD-K00603606	ticlopidine	Purinergic receptor antagonist		P2RY12, CYP2B6, CYP2C19	Purinergic receptor antagonist
2849	29.01	cp	BRD-K06080977	eicosatetraynoic-acid	Cyclooxygenase inhibitor		ALOX12, PPARA, PPARG, PTGS1	Cyclooxygenase inhibitor, Lipoxygenase inhibitor
2850	29	cp	BRD-K84175871	pseudoephedrine	Adrenergic receptor agonist		ADRA1A, ADRA2A, ADRB1, ADRB2, ATF1, ATF2, ATF3, ATF4, ATF5, ATF6, ATF7, CXCL8, FOS, HRH1, IL2, JDP2, JUN, NFATC1, SLC6A2, SLC6A3, SLC6A4, TNF	Adrenergic receptor agonist
2851	28.99	cp	BRD-K70881766	solanine	Acetylcholinesterase inhibitor			Acetylcholinesterase inhibitor
2855	28.89	cp	BRD-K77793136	hydroxyfasudil	Rho associated kinase inhibitor		ROCK1, PKIA, PRKACA, ROCK2	Rho associated kinase inhibitor
2866	28.68	cp	BRD-K02715688	hydrastine	Tyrosine hydroxylase inhibitor			Tyrosine hydroxylase inhibitor
2871	28.57	cp	BRD-K04414442	SB-222200	Tachykinin antagonist		TACR3	Tachykinin antagonist
2874	28.47	cp	BRD-K04976539	aminogenistein	SRC inhibitor		LCK	SRC inhibitor
2875	28.45	cp	BRD-A47633927	NPC-15199	ICAM1 antagonist		ICAM1, PPARG	ICAM1 antagonist
2879	28.36	cp	BRD-K78633253	EXO-1	ARF inhibitor			ARF inhibitor
2890	28.06	cp	BRD-A61470182	n-formylmethionylalanine	macrophage activator			macrophage activator
2893	28.05	cp	BRD-K92731339	perindopril	ACE inhibitor		ACE	ACE inhibitor
2895	27.98	cp	BRD-K90333595	phentolamine	Adrenergic receptor antagonist		ADRA1A, ADRA2A, ADRA1B, ADRA1D, ADRA2B, ADRA2C	Adrenergic receptor antagonist
2899	27.95	cp	BRD-K10974103	diloxanide	Protein synthesis inhibitor			Protein synthesis inhibitor
2905	27.85	cp	BRD-K28863208	PNU-282987	Cholinergic receptor agonist		CHRNA7	Cholinergic receptor agonist
2908	27.67	cp	BRD-K36258877	AZ-10417808	Caspase inhibitor		CASP3	Caspase inhibitor
2909	27.62	cp	BRD-K89708791	rifaximin	RNA synthesis inhibitor		NR1I2, CYP3A4	RNA synthesis inhibitor
2918	27.46	cp	BRD-A28422058	L-689560	Glutamate receptor antagonist		GRIN1, GRIN2A, GRIN2B, GRIN2C, GRIN2D	Glutamate receptor antagonist
2921	27.39	cp	BRD-K19462402	buflomedil	Adrenergic receptor antagonist		CACNA1C	Adrenergic receptor antagonist, Calcium channel blocker
2926	27.21	cp	BRD-K17868609	BRL-54443	Serotonin receptor agonist		HTR1E, HTR1F	Serotonin receptor agonist
2927	27.18	cp	BRD-K70241288	L-692585	Growth hormone releasing peptide ligand agonist		GH1, GHSR	Growth hormone releasing peptide ligand agonist
2930	27.13	cp	BRD-K75615183	talipexole	Adrenergic receptor agonist		DRD2, HTR3A	Adrenergic receptor agonist, Dopamine receptor agonist
2934	27.04	cp	BRD-K13725475	rhodomyrtoxin	Cytotoxic agent			Cytotoxic agent, DNA intercalator
2940	26.95	cp	BRD-K09471561	levofloxacin	Bacterial DNA gyrase inhibitor		TOP2A	Bacterial DNA gyrase inhibitor
2947	26.69	cp	BRD-K72783841	tyrphostin-AG-555	EGFR inhibitor		CDK2, EGFR	EGFR inhibitor
2949	26.65	cp	BRD-K92492521	LY-255283	Leukotriene receptor antagonist		LTB4R, LTB4R2	Leukotriene receptor antagonist
2951	26.59	cp	BRD-K55468218	spiperone	Dopamine receptor antagonist		ADRA1A, DRD2, DRD3, DRD4, HTR1A, HTR2A, HTR7, ADRA1B, ADRA1D, DRD1, DRD5, HTR1D, HTR2B, HTR2C, HTR6	Dopamine receptor antagonist
2954	26.45	cp	BRD-K64245000	GW-4064	FXR agonist		NR1H4	FXR agonist
2955	26.44	cp	BRD-K93188295	ARC-239	Adrenergic receptor antagonist		ADRA2B, ADRA2A, ADRA2C	Adrenergic receptor antagonist
2956	26.43	cp	BRD-K66874953	pifithrin-alpha	TP53 inhibitor		TP53	TP53 inhibitor
2959	26.35	cp	BRD-K00959089	thenoyltrifluoroacetone	Chelating agent		CES1, PPARA, SDHA	Chelating agent
2967	26.18	cp	BRD-A18763547	BAX-channel-blocker	Cytochrome C release inhibitor		BAX	Cytochrome C release inhibitor
2968	26.17	cp	BRD-K37516142	idebenone	Calcium channel modulator			Calcium channel modulator
2971	26.03	cp	BRD-K79254416	decitabine	DNA methyltransferase inhibitor		DNMT1	DNA methyltransferase inhibitor
2972	26	cp	BRD-A87606379	nadolol	Adrenergic receptor antagonist		ADRB1, ADRB2, ADRB3	Adrenergic receptor antagonist
2975	25.97	cp	BRD-K59570838	homoveratrylamine	Dopamine analog			Dopamine analog
2976	25.94	cp	BRD-K86930074	cediranib	KIT inhibitor		KDR, FLT1, FLT4, KIT, PDGFRB, CSF1R, FLT3, PDGFRA	KIT inhibitor, VEGFR inhibitor
2979	25.89	cp	BRD-K35559145	levomepromazine	Dopamine receptor antagonist		ADRA1A, ADRA1B, ADRA1D, ADRA2A, ADRA2B, ADRA2C, CHRM1, CHRM2, CHRM3, CHRM4, CHRM5, DRD1, DRD2, DRD3, DRD4, DRD5, HRH1, HTR2A, HTR2C	Dopamine receptor antagonist
2980	25.87	cp	BRD-A15530910	carpindolol	Adrenergic receptor antagonist			Adrenergic receptor antagonist, Serotonin receptor antagonist
2993	25.62	cp	BRD-K64341947	CFM-1571	Guanylate cyclase activator			Guanylate cyclase activator
2995	25.6	cp	BRD-A75402480	desoxycorticosterone	Mineralocorticoid receptor agonist			Mineralocorticoid receptor agonist
3001	25.46	cp	BRD-K50140147	NVP-TAE684	ALK inhibitor		ALK, INSR	ALK inhibitor
3010	25.26	cp	BRD-K92817986	BJM-CSC-19	MEK inhibitor			MEK inhibitor
3012	25.24	cp	BRD-K07325606	hispidin	PKC inhibitor		PREP, PRKCB, PTGS2, XDH	PKC inhibitor
3013	25.22	cp	BRD-K09132007	D-4476	TGF beta receptor inhibitor		CSNK1A1, CSNK1D, TGFB1	TGF beta receptor inhibitor
3020	25.08	cp	BRD-A49370193	RO-60-0175	Serotonin receptor agonist		HTR2C, HTR2A, HTR2B	Serotonin receptor agonist
3039	24.7	cp	BRD-K28453807	nitrocaramiphen	Cholinergic receptor antagonist			Cholinergic receptor antagonist
3041	24.64	cp	BRD-K69837166	trap-101	Nociceptin/orphanin FQ (NOP) receptor antagonist		OPRL1	Nociceptin/orphanin FQ (NOP) receptor antagonist, Opioid receptor antagonist
3043	24.6	cp	BRD-A17428743	BW-723C86	Serotonin receptor agonist		HTR2B, HTR2A, HTR2C	Serotonin receptor agonist
3048	24.49	cp	BRD-K60770992	pergolide	Dopamine receptor agonist		DRD1, DRD2, ADRA2A, ADRA2B, ADRA2C, DRD3, DRD4, DRD5, HTR1A, HTR1B, HTR1D, HTR2A, HTR2B, HTR2C, ADRA1A, ADRA1B, ADRA1D, KCNA5	Dopamine receptor agonist
3049	24.47	cp	BRD-K32292990	CGP-53353	EGFR inhibitor		EGFR, PRKCB	EGFR inhibitor, PKC inhibitor
3055	24.36	cp	BRD-K89055274	alverine	Muscle relaxant		HTR1A	Muscle relaxant
3060	24.25	cp	BRD-A57457122	VU-0400071-3	Glutamate receptor modulator		GRM4	Glutamate receptor modulator
3061	24.25	cp	BRD-A01826957	xanthinol	Vasodilator			Vasodilator
3062	24.2	cp	BRD-K53913732	SB-408124	Orexin receptor antagonist		HCRTR1, HCRTR2	Orexin receptor antagonist
3063	24.19	cp	BRD-K94379058	BML-190	Cannabinoid receptor inverse agonist		CNR2	Cannabinoid receptor inverse agonist
3075	23.95	cp	BRD-K46469693	SCH-442416	Adenosine receptor antagonist		ADORA1, ADORA2A, ADORA2B, ADORA3	Adenosine receptor antagonist
3076	23.95	cp	BRD-A41995253	brucine	Glycine receptor antagonist		CHRM1, CHRM2, CHRM3, CHRM4, CHRM5	Glycine receptor antagonist
3088	23.67	cp	BRD-A67438293	treprostinil	Prostacyclin analog		PTGIR, CYP2C8, P2RY12, PPARD, PTGDR, PTGER1, PTGER2, PTGER3, PTGER4	Prostacyclin analog
3093	23.51	cp	BRD-K23623876	decafluorobutane	Contrast agent		GRM5	Contrast agent
3097	23.44	cp	BRD-K14441456	tyrphostin-AG-556	EGFR inhibitor		EGFR	EGFR inhibitor
3099	23.38	cp	BRD-K11433652	aspirin	Cyclooxygenase inhibitor		PTGS1, PTGS2, TP53, AKR1C1, ASIC3, EDNRA, HSPA5, IKBKB, NFKB1, NFKB2, NFKBIA, PRKAA1, PRKAA2, PRKAB1, PRKAB2, PRKAG1, PRKAG2, PRKAG3, RPS6KA3	Cyclooxygenase inhibitor
3105	23.16	cp	BRD-A09094913	strychnine	Acetylcholine receptor antagonist		GLRA1, CHRM1, CHRM2, CHRM3, CHRM4, CHRM5, CHRNA10, CHRNA9, GLRA2, GLRA3, GLRB	Acetylcholine receptor antagonist
3106	23.15	cp	BRD-K84266862	BRL-50481	Phosphodiesterase inhibitor		PDE7A, PDE7B	Phosphodiesterase inhibitor
3116	22.87	cp	BRD-A30815329	felodipine	Calcium channel blocker		CACNA1C, CACNA1D, CACNA1H, CACNA1S, CACNA2D1, CACNA2D2, CACNB2, CALM1, CFTR, NR3C2, PDE1A, PDE1B, TNNC1, TNNC2	Calcium channel blocker
3119	22.8	cp	BRD-K56301217	ABT-737	BCL inhibitor		BCL2, BCL2L1, BCL2L2	BCL inhibitor
3122	22.74	cp	BRD-K21672174	RO-28-1675	Glucokinase activator		GCK	Glucokinase activator
3127	22.66	cp	BRD-K19227686	phenolphthalein	Indicator dye			Indicator dye
3129	22.61	cp	BRD-K34508425	KUC103898N	-666			-666
3132	22.54	cp	BRD-K49669041	BX-912	Pyruvate dehydrogenase kinase inhibitor		PDPK1, AKT2, CDK2, CHEK1, GSK3B, KDR, PDK1	Pyruvate dehydrogenase kinase inhibitor
3133	22.51	cp	BRD-A79465854	auranofin	NFkB pathway inhibitor		IKBKB, PRDX5, TRPA1, TXNRD1, TXNRD2	NFkB pathway inhibitor
3138	22.33	cp	BRD-K17140735	SCH-79797	Proteasome inhibitor		F2R	Proteasome inhibitor
3145	22.15	cp	BRD-A97739905	ketoprofen	Cyclooxygenase inhibitor		PTGS2, PTGS1, CXCR1, SLC5A8	Cyclooxygenase inhibitor
3152	21.95	cp	BRD-K36395411	SB-206553	Serotonin receptor antagonist		HTR2B, HTR2C, HTR1A, HTR2A	Serotonin receptor antagonist
3156	21.87	cp	BRD-K92778217	mefenamic-acid	Cyclooxygenase inhibitor		PTGS2, PTGS1, KCNQ1, TRPM3	Cyclooxygenase inhibitor
3159	21.72	cp	BRD-A21723284	naltriben	Opioid receptor antagonist		OPRD1, OPRK1, OPRM1	Opioid receptor antagonist
3164	21.7	cp	BRD-K40645748	mefloquine	Adenosine receptor antagonist		ADORA2A, HBA1, PANX1	Adenosine receptor antagonist, Hemoglobin antagonist
3171	21.49	cp	BRD-K87049188	fusaric-acid	Dopamine beta hydroxylase inhibitor		DBH	Dopamine beta hydroxylase inhibitor
3175	21.42	cp	BRD-K33483813	actarit	Interleukin receptor agonist			Interleukin receptor agonist
3177	21.31	cp	BRD-K93433262	alfacalcidol	Vitamin D receptor agonist		VDR, CYP27B1, CYP3A5	Vitamin D receptor agonist
3182	21.22	cp	BRD-K12906962	dichlorobenzamil	Sodium/calcium exchange inhibitor			Sodium/calcium exchange inhibitor
3185	21.14	cp	BRD-K96670504	lonidamine	Glucokinase inhibitor		GCK	Glucokinase inhibitor
3192	20.99	cp	BRD-K50938287	sumatriptan	Serotonin receptor agonist		HTR1D, HTR1B, HTR1A, HTR1F, HTR1E, HTR5A, HTR6, HTR7	Serotonin receptor agonist
3193	20.98	cp	BRD-K03440695	boldine	Acetylcholine receptor antagonist		CHRNA4, CHRNB2, DRD1, DRD2	Acetylcholine receptor antagonist, Dopamine receptor antagonist
3194	20.98	cp	BRD-K34098590	tienilic-acid	Sodium/potassium/chloride transporter inhibitor		CYP2C9, SLC12A1, SLC22A12	Sodium/potassium/chloride transporter inhibitor
3195	20.97	cp	BRD-A61858259	CAY-10415	Insulin sensitizer		INS	Insulin sensitizer
3202	20.86	cp	BRD-A24228527	ofloxacin	Bacterial DNA gyrase inhibitor		TOP2A	Bacterial DNA gyrase inhibitor
3205	20.81	cp	BRD-K86465814	HO-013	PPAR receptor agonist		PPARG	PPAR receptor agonist
3216	20.62	cp	BRD-A96897502	U-74389F	Lipid peroxidase inhibitor			Lipid peroxidase inhibitor
3218	20.55	cp	BRD-K64670467	JNJ-16259685	Glutamate receptor antagonist		GRM1	Glutamate receptor antagonist
3221	20.49	cp	BRD-K93258693	GW-9662	PPAR receptor antagonist		PPARG, NCOA2, RXRA	PPAR receptor antagonist
3222	20.47	cp	BRD-K30570479	VU-0400195-3	Glutamate receptor modulator		GRM4	Glutamate receptor modulator
3229	20.19	cp	BRD-K95851186	CGP-13501	GABA receptor modulator		GABBR1	GABA receptor modulator
3231	20.14	cp	BRD-K08619574	thioproperazine	Dopamine receptor antagonist		ADRA1A, ADRA1B, DRD1, DRD2, HTR1A, HTR2A	Dopamine receptor antagonist
3233	20.08	cp	BRD-K82164249	andarine	Androgen receptor modulator		AR	Androgen receptor modulator
3235	20.02	cp	BRD-K26863634	BIX-01338	Histone lysine methyltransferase inhibitor			Histone lysine methyltransferase inhibitor
3240	19.96	cp	BRD-K20141153	atomoxetine	Norepinephrine transporter inhibitor		SLC6A2, SLC6A3, SLC6A4, GRIN1, GRIN2A, GRIN2B, GRIN2C, GRIN2D, GRIN3A, GRIN3B	Norepinephrine transporter inhibitor
3241	19.95	cp	BRD-A55946879	BW-B70C	Lipoxygenase inhibitor		ALOX5	Lipoxygenase inhibitor
3243	19.92	cp	BRD-A30590053	MR-16728	Acetylcholine release enhancer			Acetylcholine release enhancer, Acetylcholine release stimulant
3244	19.89	cp	BRD-A48809242	IB-MECA	Adenosine receptor agonist		ADORA3, ADORA1, ADORA2A, ADORA2B	Adenosine receptor agonist
3249	19.7	cp	BRD-K41903098	diphenoxylate	Opioid receptor agonist		OPRM1, OPRD1	Opioid receptor agonist
3253	19.61	cp	BRD-A61856038	tremulacin	Lipoxygenase inhibitor			Lipoxygenase inhibitor
3254	19.58	cp	BRD-K20655524	mefexamide	Psychoactive drug			Psychoactive drug
3260	19.52	cp	BRD-K92015269	GBR-12783	Dopamine uptake inhibitor			Dopamine uptake inhibitor
3261	19.5	cp	BRD-A22684332	procaterol	Adrenergic receptor agonist		ADRB2	Adrenergic receptor agonist
3262	19.47	cp	BRD-K46212057	voriconazole	Cytochrome P450 inhibitor		CYP2C19, CYP51A1	Cytochrome P450 inhibitor
3265	19.37	cp	BRD-K93080877	Ala-Ala-Phe-CMK	Tripeptidyl peptidase inhibitor		TPP2	Tripeptidyl peptidase inhibitor
3276	19.13	cp	BRD-K39987650	bisacodyl	Laxative			Laxative
3281	19.06	cp	BRD-A61793559	metolazone	Carbonic anhydrase inhibitor		SLC12A3, CA2, CA7	Carbonic anhydrase inhibitor
3282	19.04	cp	BRD-K88560311	rucaparib	PARP inhibitor		PARP1, PARP2	PARP inhibitor
3294	18.76	cp	BRD-K61250553	loperamide	Opioid receptor agonist		OPRM1, OPRD1, CACNA1A, CALM1, CYP2B6, CYP2C8, NPR2, OPRK1, POMC	Opioid receptor agonist
3295	18.7	cp	BRD-K46766488	S-14506	Serotonin receptor agonist		HTR1A, DRD2, HTR2C	Serotonin receptor agonist
3298	18.67	cp	BRD-K63792901	arecaidine	Acetylcholine receptor agonist		CHRM1, CHRM2, CHRM3, CHRM4	Acetylcholine receptor agonist
3299	18.66	cp	BRD-K33193182	methylnorlichexanthone	Aurora kinase inhibitor		AURKB, KDR, PIM1	Aurora kinase inhibitor, PIM inhibitor, VEGFR inhibitor
3301	18.52	cp	BRD-K67847053	guanabenz	Adrenergic receptor agonist		ADRA2A, ADRA2B, ADRA2C	Adrenergic receptor agonist
3302	18.5	cp	BRD-A31195449	TCB2	Serotonin receptor agonist		HTR2A	Serotonin receptor agonist
3304	18.5	cp	BRD-K97764662	PD-173074	FGFR inhibitor		FGFR1, FGFR3, FGFR2, FGFR4, FLT1, FLT4, KDR, PDGFRA, PDGFRB	FGFR inhibitor, VEGFR inhibitor
3312	18.29	cp	BRD-K78959463	FPL-64176	Calcium channel activator		CACNA1C, CACNA1S	Calcium channel activator
3321	18.05	cp	BRD-K53570330	carbofuran	Cholinesterase inhibitor			Cholinesterase inhibitor
3322	17.95	cp	BRD-K12357156	AG-490	EGFR inhibitor		JAK2, JAK3, EGFR, STAT3	EGFR inhibitor, ErbB2 inhibitor, JAK inhibitor
3324	17.94	cp	BRD-K17796732	JWH-015	Cannabinoid receptor agonist		CNR2, GPR55	Cannabinoid receptor agonist
3333	17.83	cp	BRD-K55301415	abiraterone	17,20 lyase inhibitor		CYP17A1, CYP11B1	17,20 lyase inhibitor, Androgen biosynthesis inhibitor, Cytochrome P450 inhibitor, Steroid sulfatase inhibitor
3344	17.55	cp	BRD-K20313525	rosmarinic-acid	GABA transaminase inhibitor		MCL1, TYR	GABA transaminase inhibitor
3348	17.49	cp	BRD-K04833372	GSK-1904529A	IGF-1 inhibitor		IGF1R, INSR	IGF-1 inhibitor, IGF-1R inhibitor, Insulin receptor ligand
3349	17.48	cp	BRD-A07440155	labetalol	Adrenergic receptor antagonist		ADRB1, ADRB2, ADRA1A, ADRA1D, ADRA1B	Adrenergic receptor antagonist
3350	17.44	cp	BRD-K91904471	SD-169	p38 MAPK inhibitor		MAPK14	p38 MAPK inhibitor
3352	17.38	cp	BRD-A14985772	ascorbyl-palmitate	antioxidant			antioxidant
3362	17.2	cp	BRD-A29731977	17-hydroxyprogesterone-caproate	progesterone receptor agonist		CYP1A2, CYP2B6, CYP3A5, PGR	progesterone receptor agonist
3366	17.14	cp	BRD-K50866992	tropisetron	Serotonin receptor antagonist		HTR3A, GLRA1, GLRA2, GLRB, HTR4	Serotonin receptor antagonist
3371	17.07	cp	BRD-K93280214	gabazine	GABA receptor antagonist		GABRA1, GABRA2, GABRA3, GABRA4, GABRA5, GABRA6, GABRG2	GABA receptor antagonist
3379	16.98	cp	BRD-A17453586	MDL-72832	Serotonin receptor agonist		HTR1A	Serotonin receptor agonist
3380	16.96	cp	BRD-K47278471	diphenhydramine	Histamine receptor antagonist		HRH1	Histamine receptor antagonist
3384	16.79	cp	BRD-K36627727	tamibarotene	Retinoid receptor agonist		RARA, RARB	Retinoid receptor agonist
3388	16.74	cp	BRD-K68620903	dydrogesterone	Progesterone receptor agonist		PGR	Progesterone receptor agonist
3390	16.68	cp	BRD-K73109821	diazoxide	Potassium channel activator		ATP1A1, CA1, CA2, KCNJ11, KCNMA1, SLC12A3	Potassium channel activator
3393	16.64	cp	BRD-K66944906	fraxidin	Carbonic anhydrase inhibitor		CA1	Carbonic anhydrase inhibitor
3399	16.34	cp	BRD-K97354755	SU-6656	SRC inhibitor		LYN, AURKB, AURKC, BRSK2, CALM1, CAMK2D, LCK, RET, SRC, YES1	SRC inhibitor
3404	16.19	cp	BRD-K47631482	bromhexine	Mucolytic agent			Mucolytic agent
3406	16.16	cp	BRD-K74761218	WT-171	HDAC inhibitor		HDAC6	HDAC inhibitor
3407	16.15	cp	BRD-K46317332	proadifen	Nitric oxide synthase inhibitor		NOS1	Nitric oxide synthase inhibitor
3411	16.06	cp	BRD-A09828896	SKF-81297	Dopamine receptor agonist		DRD1, DRD5	Dopamine receptor agonist
3412	16.05	cp	BRD-K34533029	tyrphostin-AG-494	EGFR inhibitor		EGFR	EGFR inhibitor
3419	15.88	cp	BRD-K62982419	cilomilast	Phosphodiesterase inhibitor		PDE4A, PDE4B, PDE4D, IL12A, IL12B, IL1B, PDE4C, TNF	Phosphodiesterase inhibitor
3421	15.86	cp	BRD-K09963420	saquinavir	HIV protease inhibitor		CYP3A4, CYP3A5	HIV protease inhibitor
3424	15.8	cp	BRD-A68723818	brompheniramine	Histamine receptor antagonist		HRH1, CHRM1, CHRM2, CHRM3, CHRM4, CHRM5	Histamine receptor antagonist
3426	15.77	cp	BRD-K93201660	ML-7	Myosin light chain kinase inhibitor		MYLK	Myosin light chain kinase inhibitor
3427	15.77	cp	BRD-K11801786	trimidox	Ribonucleotide reductase inhibitor		RRM1	Ribonucleotide reductase inhibitor
3433	15.68	cp	BRD-K64610608	EMF-bca1-57	caspase inhibitor		CASP3	caspase inhibitor
3434	15.63	cp	BRD-K92138166	mammea-a	other antibiotic			other antibiotic
3436	15.56	cp	BRD-K55034111	pefloxacin	Bacterial DNA gyrase inhibitor		TOP2A	Bacterial DNA gyrase inhibitor
3438	15.46	cp	BRD-K27305650	LY-294002	MTOR inhibitor		MTOR, PIK3CD, PIK3CG, PIK3CA, PIK3CB, PLK1, PRKDC, AKT1, CHEK1, GSK3B, LCK, MAPK1, MAPK11, MAPK12, MAPK14, MAPK8, PDE2A, PRKCA, ROCK1, RPS6KB1, SGK1	MTOR inhibitor, PI3K inhibitor, DNA dependent protein kinase inhibitor, Phosphodiesterase inhibitor, PLK inhibitor
3443	15.35	cp	BRD-K32906660	bis-tyrphostin	EGFR inhibitor		DNM1, EGFR	EGFR inhibitor
3448	15.23	cp	BRD-K50859149	sulfafurazole	Bacterial antifolate			Bacterial antifolate
3454	15.08	cp	BRD-A71009679	KUC103420N	-666			-666
3456	14.98	cp	BRD-K97181089	amiloride	Sodium channel blocker		SCNN1A, ASIC1, ASIC2, SCNN1B, SCNN1G, AOC1, ASIC3, PKD2, PKD2L1, PLAU, SCNN1D, SLC9A1, TRPC7, TRPV2	Sodium channel blocker
3458	14.96	cp	BRD-A14798026	mestranol	Estrogen receptor agonist		ESR1	Estrogen receptor agonist
3461	14.94	cp	BRD-A64479082	quinidine	Sodium channel blocker		SCN5A, ABCB1, CYP2D6, KCNA5, KCNA7, KCNH1, KCNH2, KCNH5, KCNK1, KCNK6, SLC29A4	Sodium channel blocker
3462	14.91	cp	BRD-K09635314	M-3M3FBS	phospholipase activator		PLCB2, PLCB3, PLCD1, PLCG1, PLCG2	phospholipase activator
3467	14.83	cp	BRD-K15588452	R-96544	Serotonin receptor antagonist		HTR2A	Serotonin receptor antagonist
3469	14.76	cp	BRD-K17415526	tyrphostin-AG-835	Protein tyrosine kinase inhibitor		EGFR	Protein tyrosine kinase inhibitor
3470	14.75	cp	BRD-K13566078	BMS-345541	IKK inhibitor		IKBKB, CHUK	IKK inhibitor
3474	14.69	cp	BRD-K09497549	kawain	Calcium channel modulator		MTOR	Calcium channel modulator, MTOR inhibitor, Sodium channel blocker
3476	14.58	cp	BRD-K97863768	prothionamide	Mycobacterium tuberculosis enoyl-[acyl-carrier-protein] reductase [NADH] (inhA) inhibitor			Mycobacterium tuberculosis enoyl-[acyl-carrier-protein] reductase [NADH] (inhA) inhibitor
3477	14.54	cp	BRD-K48735772	PD-158780	EGFR inhibitor		EGFR	EGFR inhibitor
3480	14.47	cp	BRD-K15791587	L-733060	Tachykinin antagonist		TACR1	Tachykinin antagonist
3490	14.19	cp	BRD-K47717570	NBQX	Glutamate receptor antagonist		GRIA1, GRIA2, GRIA3, GRIA4, GRIK1, GRIN1, GRIN2A, GRIN2B	Glutamate receptor antagonist
3492	14.09	cp	BRD-A43930669	L-368899	Oxytocin receptor antagonist		OXTR, AVPR1A, AVPR2, OXT	Oxytocin receptor antagonist
3494	14.05	cp	BRD-K60690191	MPEP	Glutamate receptor antagonist		GRM5, GRM1, GRM4	Glutamate receptor antagonist
3501	13.82	cp	BRD-K46068882	eugenitol	Bacterial quorum sensing inhibitor		AR, MAOA	Bacterial quorum sensing inhibitor, Chromone, Monoamine oxidase inhibitor, Androgen receptor antagonist
3505	13.74	cp	BRD-K69690935	curcumin	Cyclooxygenase inhibitor		PTGS1, PTGS2, APP, CA1, CA12, CA14, CA2, CA4, CA6, CA9, CCND1, CYP3A4, DNMT1, DNMT3B, EP300, G6PC, MAPT, MMP13, MMP9, NOS2, XDH	Cyclooxygenase inhibitor, Histone acetyltransferase inhibitor, Lipoxygenase inhibitor, NFkB pathway inhibitor
3509	13.65	cp	BRD-K60923938	veratridine	Sodium channel activator		SCN1A, SCN3A, SCN8A, SCN9A	Sodium channel activator
3510	13.62	cp	BRD-A44133049	azasetron	Serotonin receptor antagonist		HTR3A, HTR3B	Serotonin receptor antagonist
3518	13.46	cp	BRD-K25310650	ormetoprim	Bacterial antifolate			Bacterial antifolate
3530	13.05	cp	BRD-K09668667	benzo(a)pyrene	Carcinogen			Carcinogen
3534	13	cp	BRD-K94512704	spiramide	Dopamine receptor antagonist		DRD2, HTR1A, HTR2A, HTR2B, HTR2C	Dopamine receptor antagonist, Serotonin receptor antagonist
3542	12.87	cp	BRD-K14693417	cinchonine	P-glycoprotein inhibitor		CYP2D6	P-glycoprotein inhibitor
3552	12.73	cp	BRD-K50495309	SRC-kinase-inhibitor-I	SRC inhibitor		CSK, LCK, RIPK2	SRC inhibitor
3553	12.73	cp	BRD-K39915878	loxapine	Dopamine receptor antagonist		DRD2, DRD3, DRD4, DRD1, HRH1, HTR2A, HTR2C, HTR6, ADRA1A, ADRA1B, ADRA2A, ADRA2B, ADRA2C, ADRB1, CHRM1, CHRM2, CHRM3, CHRM4, CHRM5, DRD5, HRH2, HRH4, HTR1A, HTR1B, HTR1D, HTR1E, HTR3A, HTR5A, HTR7, SLC6A2, SLC6A3, SLC6A4	Dopamine receptor antagonist, Dopamine receptor ligand, Serotonin receptor antagonist
3559	12.67	cp	BRD-K68103045	CGS-20625	Benzodiazepine receptor agonist		GABRA1, GABRA2, GABRA3, GABRA5	Benzodiazepine receptor agonist, GABA benzodiazepine site receptor partial agonist
3565	12.56	cp	BRD-A41145729	methoprene-acid	Retinoid receptor agonist		NCOA2, NR1H3, RXRA, RXRB	Retinoid receptor agonist
3569	12.46	cp	BRD-K31471398	dihydrexidine	Dopamine receptor agonist		DRD1, DRD2, DRD3, DRD4, DRD5	Dopamine receptor agonist
3570	12.44	cp	BRD-A99411506	esculin	Antioxidant			Antioxidant
3571	12.43	cp	BRD-K67680372	CI-966	GAT inhibitor		SLC6A1	GAT inhibitor
3575	12.37	cp	BRD-K90524085	MY-5445	Phosphodiesterase inhibitor		PDE5A	Phosphodiesterase inhibitor, Platelet aggregation inhibitor
3581	12.12	cp	BRD-K21971034	OM-137	Aurora kinase inhibitor			Aurora kinase inhibitor
3587	12.03	cp	BRD-K18909381	CGS-12066B	Serotonin receptor agonist		HTR1B, HTR1A, HTR1D, HTR2A, HTR2B, HTR2C	Serotonin receptor agonist
3588	12.03	cp	BRD-A51829654	BRL-15572	Serotonin receptor antagonist		HTR1D, HTR1A, HTR1B, HTR1E, HTR1F, HTR2A, HTR2B, HTR2C, HTR6	Serotonin receptor antagonist
3598	11.9	cp	BRD-K70778732	trazodone	Adrenergic receptor antagonist		HTR2A, HTR2C, SLC6A4, ADRA1A, ADRA2A, HRH1, HTR1A, HTR2B	Adrenergic receptor antagonist, Serotonin receptor antagonist, Serotonin reuptake inhibitor
3603	11.79	cp	BRD-K49049886	CGS-15943	Adenosine receptor antagonist		ADORA1, ADORA2A, ADORA2B, ADORA3	Adenosine receptor antagonist
3604	11.69	cp	BRD-K16277217	piperacetazine	Dopamine receptor antagonist			Dopamine receptor antagonist
3611	11.59	cp	BRD-K36638830	anabasine	Acetylcholine receptor agonist			Acetylcholine receptor agonist
3615	11.55	cp	BRD-A73581086	ergometrine	Adrenergic receptor agonist		ADRA1A, HTR1E, HTR2A	Adrenergic receptor agonist, Serotonin receptor agonist
3620	11.46	cp	BRD-K24675965	LY-288513	CCK receptor antagonist		CCKBR	CCK receptor antagonist
3622	11.45	cp	BRD-K77641333	naphazoline	Adrenergic receptor agonist		ADRA1A, ADRA2A	Adrenergic receptor agonist
3623	11.43	cp	BRD-A24191444	ifenprodil	Adrenergic receptor antagonist		GRIN1, GRIN2B	Adrenergic receptor antagonist, Glutamate receptor antagonist
3624	11.42	cp	BRD-K23913458	coumarin	Vitamin K antagonist		CA1, CA12, CA14, CA2, CA4, CA6, CA9, CYP2A6	Vitamin K antagonist
3625	11.4	cp	BRD-K94080537	diethyltoluamide	DEET activator of fly antenna ionotropic receptor IR40a			DEET activator of fly antenna ionotropic receptor IR40a
3634	10.96	cp	BRD-K36009368	NNC-63-0532	Opioid receptor agonist		OPRL1	Opioid receptor agonist
3638	10.87	cp	BRD-K39462424	dexchlorpheniramine	Histamine receptor antagonist			Histamine receptor antagonist
3640	10.86	cp	BRD-K53979406	ALX-5407	Glycine transporter inhibitor		SLC6A9	Glycine transporter inhibitor
3642	10.83	cp	BRD-A41519720	ezetimibe	Niemann-Pick C1-like 1 protein antagonist		NPC1L1, ANPEP, SOAT1	Niemann-Pick C1-like 1 protein antagonist, Cholesterol inhibitor
3645	10.81	cp	BRD-A31159102	fluoxetine	Selective serotonin reuptake inhibitor (SSRI)		SLC6A4, ANO1, CYP2C19, HTR2B	Selective serotonin reuptake inhibitor (SSRI)
3646	10.8	cp	BRD-K47693913	evoxine	Furoquinoline alkaloid			Furoquinoline alkaloid
3649	10.75	cp	BRD-K07762753	aminopurvalanol-a	Tyrosine kinase inhibitor		CDK1, CDK2, CDK5, CDK6	Tyrosine kinase inhibitor, CDK inhibitor
3653	10.62	cp	BRD-A67748489	K3644	Kinesin-like spindle protein inhibitor		KIF11	Kinesin-like spindle protein inhibitor
3655	10.57	cp	BRD-A59215453	lobelanidine	Acetylcholine receptor antagonist		SLC18A2, CHRNA10, CHRNA4, CHRNA9, CHRNB2, OPRM1	Acetylcholine receptor antagonist, Dopamine receptor modulator, Opioid receptor antagonist, Vesicular monoamine transporter ligand
3656	10.55	cp	BRD-K80451230	zamifenacin	Acetylcholine receptor antagonist		CHRM3	Acetylcholine receptor antagonist
3661	10.36	cp	BRD-K29668683	BD-1063	Sigma receptor antagonist		SIGMAR1	Sigma receptor antagonist
3668	10.19	cp	BRD-K80738081	resveratrol	Cytochrome P450 inhibitor		PTGS1, PTGS2, SIRT1, APOA1, BACE1, CSNK2A1, MAOA, NQO2, SCN5A, TXNRD1, TXNRD2, XDH	Cytochrome P450 inhibitor, SIRT activator
3679	9.97	cp	BRD-K67013324	luzindole	Melatonin receptor antagonist		MTNR1B, MTNR1A	Melatonin receptor antagonist
3682	9.87	cp	BRD-K28029915	dolasetron	Serotonin receptor antagonist		HTR3A	Serotonin receptor antagonist
3687	9.75	cp	BRD-K48923948	BMS-641988	Androgen receptor antagonist		AR	Androgen receptor antagonist
3688	9.71	cp	BRD-K46435977	valaciclovir	DNA polymerase inhibitor			DNA polymerase inhibitor
3690	9.66	cp	BRD-K93095519	SJ-172550	MDM inhibitor		MDM4	MDM inhibitor
3692	9.65	cp	BRD-K84639753	safinamide	Dopamine uptake inhibitor		MAOB, SLC6A3	Dopamine uptake inhibitor, Glutamate inhibitor, Monoamine oxidase inhibitor
3698	9.6	cp	BRD-A36074203	remacemide	Glutamate receptor antagonist		GRIN1	Glutamate receptor antagonist
3707	9.44	cp	BRD-K30240666	clemastine	Histamine receptor antagonist		HRH1	Histamine receptor antagonist
3714	9.23	cp	BRD-A77291778	cyclopentolate	Acetylcholine receptor antagonist		CHRM1	Acetylcholine receptor antagonist
3722	9.03	cp	BRD-A10355991	norketamine	Glutamate receptor antagonist		CYP2B6, CYP2C19, CYP3A5, GRIN1	Glutamate receptor antagonist
3727	8.89	cp	BRD-K66956375	oleoylethanolamide	Cannabinoid receptor agonist		CNR1, GPR119, GPR55, KCND3, PPARA	Cannabinoid receptor agonist, Glucose dependent insulinotropic receptor agonist, Potassium channel blocker, PPAR receptor agonist
3729	8.86	cp	BRD-K42748308	XE-991	Potassium channel blocker		KCNQ1, KCNQ2, KCNQ3, KCNQ4, KCNQ5	Potassium channel blocker
3750	8.04	cp	BRD-K68402494	ML-9	Myosin light chain kinase inhibitor		MLCK, TRPC6, PKA, PKC	Myosin light chain kinase inhibitor
3758	7.7	cp	BRD-K04146668	GW-441756	Growth factor receptor inhibitor		LRRK2, NTRK1	Growth factor receptor inhibitor
3759	7.7	cp	BRD-A09467419	mebeverine	Acetylcholine receptor antagonist		CHRM1, CHRM2, CHRM3, CHRM4	Acetylcholine receptor antagonist
3762	7.65	cp	BRD-K08998509	fananserin	Dopamine receptor antagonist		HTR2A, DRD4	Dopamine receptor antagonist, Serotonin receptor antagonist
3769	7.42	cp	BRD-K72029282	probucol	Atherogenesis inhibitor		ABCA1, ABCB11, CES1	Atherogenesis inhibitor
3771	7.4	cp	BRD-A96255180	ribavirin	Antiviral		IMPDH1, ADK, ENPP1, IMPDH2, NT5C2	Antiviral
3773	7.34	cp	BRD-K93918653	quizartinib	FLT3 inhibitor		FLT3, CSF1R, KIT, RET, PDGFRA, PDGFRB	FLT3 inhibitor
3776	7.25	cp	BRD-A68888262	azelastine	Histamine receptor antagonist		HRH1, CYP2C19	Histamine receptor antagonist
3778	7.17	cp	BRD-K75181824	acetyl-geranygeranyl-cysteine	Inhibitor of methyl esterification of geranylgeranylated proteins			Inhibitor of methyl esterification of geranylgeranylated proteins
3782	7.05	cp	BRD-A38747044	KU-14R	Imidazoline receptor ligand			Imidazoline receptor ligand, Putative I3 antagonist
3785	6.99	cp	BRD-A70407468	PSB-36	Adenosine receptor antagonist		ADORA1, ADORA2A, ADORA2B, ADORA3	Adenosine receptor antagonist
3788	6.71	cp	BRD-A11813248	AM-92016	Potassium channel blocker		GRIN1, GRIN2B	Potassium channel blocker
3794	6.58	cp	BRD-K72034655	peucedanin	Apoptosis stimulant			Apoptosis stimulant
3802	6.23	cp	BRD-K95202259	ML-3163	p38 MAPK inhibitor		CYP2D6, CYP3A4, MAPK11, MAPK12, MAPK14	p38 MAPK inhibitor
3803	6.18	cp	BRD-K63068307	ZSTK-474	PI3K inhibitor		PIK3CG, PIK3CA, PIK3CB, PIK3CD	PI3K inhibitor
3808	5.9	cp	BRD-A39052811	mosapride	Serotonin receptor agonist		HTR4, HTR3A	Serotonin receptor agonist
3809	5.9	cp	BRD-K84955386	hyperoside	Glucosidase inhibitor		ACE, AKR1B1, GAA	Glucosidase inhibitor
3813	5.77	cp	BRD-U94846492	quinine	Hemozoin biocrystallization inhibitor		KCNN4, ABCB1, CYP2D6, GP9, KCNB2, SLC29A4	Hemozoin biocrystallization inhibitor
3826	5.43	cp	BRD-K28470988	L-690330	Inositol monophosphatase inhibitor		IMPA1	Inositol monophosphatase inhibitor
3829	5.34	cp	BRD-K27710560	splitomycin	SIRT inhibitor		SIRT1, SIRT2	SIRT inhibitor
3830	5.1	cp	BRD-A16694057	bisphenol-a	PPAR receptor antagonist		AR, ESR2, ESRRG, PPARG	PPAR receptor antagonist
3833	4.92	cp	BRD-K82746043	navitoclax	BCL inhibitor		BCL2, BCL2L1, BCL2L2	BCL inhibitor
3834	4.83	cp	BRD-A13946108	sulindac	Cyclooxygenase inhibitor		AKR1B1, PTGS1, PTGS2, MAPK3, PPARD, PTGDR2	Cyclooxygenase inhibitor
3835	4.81	cp	BRD-A06784547	MRS-1334	Adenosine receptor antagonist			Adenosine receptor antagonist
3836	4.72	cp	BRD-A39969961	eplerenone	Cytochrome P450 inhibitor		NR3C2, CYP3A5	Cytochrome P450 inhibitor
3839	4.66	cp	BRD-A84389091	L-655708	GABA receptor inverse agonist		GABRA5, GABRA1, GABRA2, GABRA3, GABRG2	GABA receptor inverse agonist
3844	4.51	cp	BRD-K48367671	febuxostat	Xanthine oxidase inhibitor		XDH	Xanthine oxidase inhibitor
3845	4.41	cp	BRD-K41143549	BRD-K41143549	Glutamate receptor antagonist			Glutamate receptor antagonist
3847	4.31	cp	BRD-A44780397	mifepristone	Glucocorticoid receptor antagonist		PGR, NR3C1, AR, CYP2B6, CYP2C8, CYP3A5, CYP3A7, NR1I2	Glucocorticoid receptor antagonist, Progesterone receptor antagonist
3850	4.22	cp	BRD-K94920105	DR-2313	PARP inhibitor		PARP1, PARP3	PARP inhibitor
3851	4.17	cp	BRD-K32412559	morphothebaine	Adrenergic receptor antagonist			Adrenergic receptor antagonist
3856	4.04	cp	BRD-K95899059	LY-344864	Serotonin receptor agonist		HTR1F, HTR1A, HTR1B, HTR1D, HTR1E, HTR2A, HTR2B, HTR2C, HTR7	Serotonin receptor agonist
3857	3.93	cp	BRD-K69763916	LY-341495	Glutamate receptor antagonist		GRM2, GRM3	Glutamate receptor antagonist
3861	3.7	cp	BRD-K86509404	iso-olomoucine	CDK inhibitor			CDK inhibitor
3866	3.42	cp	BRD-A47494775	dipivefrine	Adrenergic receptor agonist		ADRA1A, ACHE, ADRA2A, ADRB2, BCHE	Adrenergic receptor agonist
3872	2.88	cp	BRD-K95885906	quercetagetin	PIM inhibitor		PIM1	PIM inhibitor
3875	2.25	cp	BRD-A78942461	ICI-118551	Adrenergic receptor antagonist			Adrenergic receptor antagonist
3876	2.03	cp	BRD-K43405658	tyrphostin-AG-527	Protein tyrosine kinase inhibitor		EGFR	Protein tyrosine kinase inhibitor
3883	1.66	cp	BRD-K55344148	BU-224	Imidazoline receptor ligand		MAOA, MAOB	Imidazoline receptor ligand
3884	-1.2	cp	BRD-K21667562	AM-404	Cyclooxygenase inhibitor		TRPV1, CNR1, CNR2, FAAH	Cyclooxygenase inhibitor, FAAH inhibitor, TRPV antagonist
3886	-1.44	cp	BRD-K91442916	CAM-9-026	Membrane metalloendopeptidase inhibitor			Membrane metalloendopeptidase inhibitor
3889	-1.62	cp	BRD-K60060639	methyllidocaine	antiarrhythmic medication			antiarrhythmic medication
3890	-1.86	cp	BRD-A11135865	nor-binaltorphimine	Opioid receptor antagonist			Opioid receptor antagonist
3891	-2.01	cp	BRD-A47829399	artesunate	DNA synthesis inhibitor			DNA synthesis inhibitor
3895	-2.4	cp	BRD-A92630576	trimebutine	Opioid receptor agonist		CHRM1, CHRM2, CHRM3, CHRM4	Opioid receptor agonist
3898	-2.64	cp	BRD-K67537649	PQ-401	IGF-1 inhibitor		IGF1R	IGF-1 inhibitor, IGF-1R inhibitor
3907	-3.31	cp	BRD-K91336023	mesulergine	Dopamine receptor agonist		HTR2A, HTR2C, HTR7, HTR2B, HTR3A, HTR3B, HTR6	Dopamine receptor agonist
3908	-3.42	cp	BRD-A71203467	l-stepholidine	Dopamine receptor antagonist		DRD2, DRD1	Dopamine receptor antagonist
3909	-3.45	cp	BRD-A19661776	mianserin	Serotonin receptor antagonist		HTR2A, HTR2C, ADRA1A, ADRA1B, ADRA1D, HRH1, HTR2B, HTR6, HTR7, ADRA2A, ADRA2B, ADRA2C, DRD1, DRD2, DRD3, DRD5, HRH2, HRH4, HTR1A, HTR1F, OPRK1, SLC6A2, SLC6A3, SLC6A4	Serotonin receptor antagonist
3912	-3.49	cp	BRD-K50938786	ropivacaine	Sodium channel blocker		SCN10A, SCN9A	Sodium channel blocker
3913	-3.58	cp	BRD-K36324071	NF-449	Purinergic receptor antagonist		P2RX1	Purinergic receptor antagonist
3917	-3.71	cp	BRD-A91008255	bepridil	Calcium channel blocker		ATP1A1, CACNA1A, CACNA1C, CACNA1H, CACNA2D2, CALM1, KCNQ1, KCNQ4, PDE1A, PDE1B, SCN5A, TNNC1	Calcium channel blocker, L-type calcium channel blocker
3919	-3.82	cp	BRD-K83302049	protopine	Histamine receptor antagonist		ACHE, SLC6A2, SLC6A4	Histamine receptor antagonist
3920	-3.98	cp	BRD-K57222227	indometacin	Cyclooxygenase inhibitor		PTGS1, PTGS2, PPARG, PTGDR2, GLO1, PLA2G2A, PPARA, PTGR2, SLC46A1	Cyclooxygenase inhibitor
3940	-5.11	cp	BRD-K88849294	lobaric-acid	Tyrosine phosphatase inhibitor		PTPN1	Tyrosine phosphatase inhibitor
3941	-5.15	cp	BRD-K91243525	SR-142948	Neurotensin receptor antagonist		NTSR1	Neurotensin receptor antagonist
3945	-5.3	cp	BRD-A85280935	quinpirole	Dopamine receptor agonist		DRD2, DRD3, DRD4, DRD1, HTR1A, HTR2A, HTR2B, HTR2C	Dopamine receptor agonist
3947	-5.34	cp	BRD-K44353683	nateglinide	Insulin secretagogue		ABCC8, KCNJ11, CYP3A4, INS, KCNJ10, PPARG	Insulin secretagogue
3951	-5.44	cp	BRD-K80639402	SB-258585	Serotonin receptor antagonist		HTR6	Serotonin receptor antagonist
3955	-5.53	cp	BRD-K80778372	RO-19-4605	GABA benzodiazepine site receptor inverse agonist		GABRA1, GABRA2, GABRA3, GABRA5	GABA benzodiazepine site receptor inverse agonist
3957	-5.63	cp	BRD-K52394958	GR-159897	Tachykinin antagonist		TACR2, TAC1	Tachykinin antagonist
3966	-5.8	cp	BRD-K80315159	DPPE	Histamine receptor antagonist		ABCB1, HRH1	Histamine receptor antagonist
3977	-5.99	cp	BRD-K60298136	ITE	Aryl hydrocarbon receptor agonist		AHR	Aryl hydrocarbon receptor agonist
3978	-6	cp	BRD-K64451768	GANT-58	GLI antagonist		DHH, GLI1, IHH	GLI antagonist
3981	-6.06	cp	BRD-K28936863	ketotifen	Histamine receptor agonist		HRH1, PDE4A, PDE4B, PDE4C, PDE4D, PDE7A, PDE7B, PDE8A, PDE8B, PGD	Histamine receptor agonist, Histamine receptor ligand, Leukotriene receptor antagonist, Phosphodiesterase inhibitor
3982	-6.15	cp	BRD-K95676198	JAK3-inhibitor-V	JAK inhibitor		JAK3	JAK inhibitor
3984	-6.18	cp	BRD-A56245458	reichstein	Androgen receptor antagonist		AR	Androgen receptor antagonist
3988	-6.3	cp	BRD-A82656074	naltrindole	Opioid receptor antagonist		OPRD1, OPRK1, OPRM1	Opioid receptor antagonist
3989	-6.31	cp	BRD-K91315211	betahistine	Histamine receptor agonist		HRH3, HRH1	Histamine receptor agonist, Histamine receptor antagonist
4005	-6.79	cp	BRD-K95992530	Cyclo-[Arg-Gly-Asp-D-Phe-Val]	integrin antagonist		ITGAV, ITGB3	integrin antagonist
4007	-6.84	cp	BRD-K02590140	O-2050	Cannabinoid receptor antagonist		CNR1	Cannabinoid receptor antagonist
4023	-7.17	cp	BRD-K86958018	olvanil	TRPV agonist		TRPV1, CNR1, GPR119	TRPV agonist
4036	-7.54	cp	BRD-K39670393	amthamine	Histamine receptor agonist		HRH2	Histamine receptor agonist
4041	-7.73	cp	BRD-A24817035	laudanosine	Central nervous system agent			Central nervous system agent
4042	-7.74	cp	BRD-K28296557	AKT-inhibitor-IV	AKT inhibitor		AKT1	AKT inhibitor
4055	-8.03	cp	BRD-K49027941	PSB-1115	Adenosine receptor antagonist		ADORA2B, ADORA1, ADORA3	Adenosine receptor antagonist
4068	-8.3	cp	BRD-A64933752	CV-1808	Adenosine receptor agonist		ADORA2A, ADORA2B	Adenosine receptor agonist
4071	-8.39	cp	BRD-A26334849	propafenone	Antiarrhythmic		KCNH2, SCN5A, ADRB1, ADRB2, KCNA5, KCNK2, KCNK3	Antiarrhythmic
4078	-8.58	cp	BRD-A24381660	zeranol	Estrogen receptor agonist			Estrogen receptor agonist
4082	-8.64	cp	BRD-A41451487	PK-11195	Benzodiazepine receptor antagonist		TSPO, NR1I2, NR1I3	Benzodiazepine receptor antagonist
4083	-8.68	cp	BRD-K21548250	moracizine	Sodium channel blocker		SCN5A	Sodium channel blocker
4090	-8.84	cp	BRD-K97118047	4,5,6,7-tetrabromobenzotriazole	Casein kinase inhibitor		CSNK2A1, AKT1, CHEK1, CSNK2A2, CSNK2B, GSK3B, LCK, MAP2K1, MAPK1, MAPK11, MAPK12, MAPK14, MAPK8, PRKCA, ROCK1, RPS6KB1, SGK1	Casein kinase inhibitor
4091	-8.84	cp	BRD-K05906022	limonin	HIV protease inhibitor			HIV protease inhibitor
4100	-8.98	cp	BRD-K82091397	SB-239063	p38 MAPK inhibitor		MAPK11, MAPK14, PTGS2, TNF	p38 MAPK inhibitor
4106	-9.12	cp	BRD-K18194590	mephentermine	Adrenergic receptor agonist		ADRA1A, ADRA1B, ADRA1D, ADRA2A, ADRA2B, ADRA2C, ADRB1, ADRB2, ADRB3	Adrenergic receptor agonist
4118	-9.34	cp	BRD-K46211610	tolazoline	Adrenergic receptor antagonist		ADRA2A, ADRA2B, ADRA2C, ADRA1A, HRH1, HRH2	Adrenergic receptor antagonist
4119	-9.37	cp	BRD-A30205217	ethotoin	Hydantoin antiepileptic		SCN5A	Hydantoin antiepileptic
4120	-9.43	cp	BRD-K81128206	edrophonium	Acetylcholinesterase inhibitor		ACHE, BCHE	Acetylcholinesterase inhibitor
4130	-9.66	cp	BRD-K92678294	irilin-a	Isoflavone			Isoflavone
4132	-9.68	cp	BRD-A26711594	nicardipine	Calcium channel blocker		CACNA1C, ADORA3, ADRA1A, ADRA1B, ADRA1D, CACNA1D, CACNA2D1, CACNB2, CALM1, CHRM1, CHRM2, CHRM3, CHRM4, CHRM5, PDE1A, PDE1B	Calcium channel blocker
4140	-9.77	cp	BRD-A60294240	tribenoside	Anti-inflammatory			Anti-inflammatory, Capillary stabilizing agent
4145	-9.98	cp	BRD-K47761761	PD-168077	Dopamine receptor agonist		DRD2, DRD4	Dopamine receptor agonist
4147	-10.01	cp	BRD-K79124250	ioxaglic-acid	Radiopaque medium			Radiopaque medium
4157	-10.25	cp	BRD-K52512893	SC-19220	Prostanoid receptor antagonist		PTGER1	Prostanoid receptor antagonist
4160	-10.29	cp	BRD-K51541829	RO-25-6981	Ionotropic glutamate receptor antagonist		GRIN2B, SLC18A2	Ionotropic glutamate receptor antagonist, Monamine transporter modulator
4163	-10.38	cp	BRD-A72441487	stiripentol	GABA uptake inhibitor		ABAT, SCN1A, SCN3A	GABA uptake inhibitor
4168	-10.46	cp	BRD-A62021152	WAY-161503	Serotonin receptor agonist		HTR2C	Serotonin receptor agonist
4173	-10.57	cp	BRD-K69556541	ryanodine	Calcium channel blocker		RYR1, RYR2, RYR3	Calcium channel blocker
4177	-10.58	cp	BRD-K36862742	hydroflumethiazide	Sodium/potassium/chloride transporter inhibitor		SLC12A1, ATP1A1, CA1, CA12, CA2, CA4, CA9, KCNMA1	Sodium/potassium/chloride transporter inhibitor
4178	-10.59	cp	BRD-A93424738	dexamethasone	Glucocorticoid receptor agonist		ANXA1, CYP3A4, CYP3A5, NOS2, NR0B1, NR3C1, NR3C2	Glucocorticoid receptor agonist, Cytochrome P450 inhibitor, Glucocorticoid receptor modulator, Corticosteroid agonist
4179	-10.61	cp	BRD-K29458283	chlorambucil	DNA inhibitor			DNA inhibitor
4181	-10.64	cp	BRD-K06221026	DUP-697	Cyclooxygenase inhibitor		PTGS2	Cyclooxygenase inhibitor
4184	-10.69	cp	BRD-K59273480	propentofylline	Adenosine reuptake inhibitor		ACHE	Adenosine reuptake inhibitor, Phosphodiesterase inhibitor
4196	-10.95	cp	BRD-K12102668	nialamide	Monoamine oxidase inhibitor		COMT, MAOA, MAOB	Monoamine oxidase inhibitor
4198	-11	cp	BRD-K04710043	hexamethylenebisacetamide	AKT inhibitor			AKT inhibitor, Differentiation inducer, NFkB pathway inhibitor
4200	-11.08	cp	BRD-K54665485	R-59022	Diacylglycerol kinase inhibitor		DGKA	Diacylglycerol kinase inhibitor, Protein kinase inhibitor
4205	-11.19	cp	BRD-K45401373	betulinic-acid	Apoptosis stimulant		CASP3, CASP8, GPBAR1, TOP1	Apoptosis stimulant, Caspase activator, Diacylglycerol O acyltransferase inhibitor, HIV integrase inhibitor, NFkB pathway activator, NFkB pathway inhibitor, SARS coronavirus 3C-like protease inhibitor, Topoisomerase inhibitor
4207	-11.26	cp	BRD-A26845397	isamoltan	Adrenergic receptor antagonist		ADRB1, ADRB2	Adrenergic receptor antagonist
4210	-11.31	cp	BRD-K85013741	auraptene	Nitric oxide production inhibitor		MAOB	Nitric oxide production inhibitor
4214	-11.39	cp	BRD-K68190965	GR-46611	Serotonin receptor agonist		HTR1D	Serotonin receptor agonist
4215	-11.43	cp	BRD-K06024458	n-arachidonyl-GABA	cannabinoid receptor agonist			cannabinoid receptor agonist
4220	-11.49	cp	BRD-K01779529	fluoropyruvate	Pyruvate dehydrogenase kinase inhibitor			Pyruvate dehydrogenase kinase inhibitor
4222	-11.52	cp	BRD-K31987754	oleylethanolamide	Cannabinoid receptor agonist		GPR119, CNR1, GPR55, KCND3, PPARA	Cannabinoid receptor agonist, Potassium channel blocker, Glucose dependent insulinotropic receptor agonist
4224	-11.56	cp	BRD-K32501161	vanoxerine	Dopamine uptake inhibitor		SLC6A3, MAOA, MAOB	Dopamine uptake inhibitor
4226	-11.6	cp	BRD-K92870997	pterostilbene	Cyclooxygenase inhibitor		FAAH, PPARA, PTGS1, PTGS2	Cyclooxygenase inhibitor, PPAR receptor agonist
4227	-11.62	cp	BRD-K08502430	angiogenesis-inhibitor	Angiogenesis inhibitor		EGFR	Angiogenesis inhibitor
4228	-11.65	cp	BRD-K59332007	linopirdine	Potassium channel blocker		KCNQ2, KCNQ3, KCNQ4, KCNQ5	Potassium channel blocker
4231	-11.74	cp	BRD-K17110974	aristolochic-acid	Phospholipase inhibitor			Phospholipase inhibitor
4236	-11.8	cp	BRD-A32836748	leu-enkephalin	Opioid receptor agonist		OPRD1, OPRM1	Opioid receptor agonist
4241	-11.96	cp	BRD-A27554692	altrenogest	Progestogen hormone		PGR	Progestogen hormone
4243	-11.98	cp	BRD-A59174698	ritodrine	Adrenergic receptor agonist		ADRB2	Adrenergic receptor agonist
4258	-12.36	cp	BRD-K44849676	capsazepine	TRPV agonist		TRPV1, TRPV4	TRPV agonist
4263	-12.43	cp	BRD-A31312900	montelukast	Leukotriene receptor antagonist		CYSLTR1, ALOX5, CYP2C8	Leukotriene receptor antagonist
4268	-12.47	cp	BRD-K35377380	I-OMe-AG-538	IGF-1 inhibitor			IGF-1 inhibitor
4270	-12.5	cp	BRD-K14536225	piceid	Glucosidase inhibitor		GAA, XDH	Glucosidase inhibitor
4278	-12.69	cp	BRD-A37347161	BRL-52537	Opioid receptor agonist		OPRK1	Opioid receptor agonist
4285	-12.76	cp	BRD-K98530306	clonidine	Adrenergic receptor agonist		ADRA2A, ADRA2B, ADRA2C, ADRA1A, ADRA1B, ADRA1D	Adrenergic receptor agonist
4287	-12.85	cp	BRD-K08287586	butylparaben	DNA synthesis inhibitor			DNA synthesis inhibitor
4296	-13.01	cp	BRD-K38323065	phenacetin	Cyclooxygenase inhibitor		PTGS1	Cyclooxygenase inhibitor
4303	-13.12	cp	BRD-A15493168	tetracycline	Bacterial 30S ribosomal subunit inhibitor		PRNP	Bacterial 30S ribosomal subunit inhibitor
4307	-13.21	cp	BRD-K60511616	pravastatin	HMGCR inhibitor		HMGCR, SLCO1B1	HMGCR inhibitor
4322	-13.43	cp	BRD-A72596465	GW-6471	PPAR receptor antagonist		PPARA	PPAR receptor antagonist
4323	-13.45	cp	BRD-K28307902	flutamide	Androgen receptor antagonist		AR, AHR, CYP2C19	Androgen receptor antagonist
4327	-13.49	cp	BRD-K79684402	RO-10-5824	Dopamine receptor agonist		DRD4	Dopamine receptor agonist
4337	-13.61	cp	BRD-K52721684	PCO-400	Potassium channel activator		ABCC9, KCNJ8	Potassium channel activator
4343	-13.74	cp	BRD-A70083328	secnidazole	Acetylcholinesterase inhibitor			Acetylcholinesterase inhibitor, Microtubule inhibitor, Antiprotozoal
4344	-13.76	cp	BRD-K96527333	dehydroisoandosterone	GABA receptor modulator			GABA receptor modulator
4346	-13.78	cp	BRD-A02189320	met-leu-phe	-666			-666
4354	-13.85	cp	BRD-K69195780	NAN-190	Serotonin receptor agonist		HTR1A, ADRA1A, ADRA1B, ADRA1D, HTR1F	Serotonin receptor agonist
4355	-13.87	cp	BRD-K35458079	edaravone	Nootropic agent		BCL2	Nootropic agent
4356	-13.89	cp	BRD-A45543382	metrizamide	Radiopaque medium			Radiopaque medium
4358	-13.93	cp	BRD-K36377456	marmesin	Angiogenesis inhibitor			Angiogenesis inhibitor
4361	-14.06	cp	BRD-K27871032	lysergol	Ergoline alkaloid		HTR1B, HTR1D, HTR1E	Ergoline alkaloid
4363	-14.13	cp	BRD-K16195444	oxymetazoline	Adrenergic receptor agonist		ADRA1A, ADRA2A, ADRA1B, ADRA1D, ADRA2B, ADRA2C, CYP2C19, HTR1B, HTR1D, HTR2C	Adrenergic receptor agonist
4364	-14.16	cp	BRD-A78295502	hydroquinine	Antiarrhythmic			Antiarrhythmic
4366	-14.2	cp	BRD-K23335153	AMN-082	Glutamate receptor modulator		GRM7	Glutamate receptor modulator, Glutamate receptor positive allosteric modulator
4367	-14.21	cp	BRD-K52989797	clomipramine	Serotonin transporter inhibitor (SERT)		SLC6A4, SLC6A2, CYP2C19, GSTP1, HTR2A, HTR2B, HTR2C, SLC6A3	Serotonin transporter inhibitor (SERT)
4369	-14.22	cp	BRD-A37837077	cyclazosin	Adrenergic receptor antagonist		ADRA1B, ADRA1A, ADRA1D	Adrenergic receptor antagonist
4372	-14.29	cp	BRD-K15715913	fluperlapine	Serotonin receptor antagonist		DRD2, HTR2A, HTR6, HTR7	Serotonin receptor antagonist
4374	-14.31	cp	BRD-K64157027	ZD-2079	Adrenergic receptor agonist		ADRB3	Adrenergic receptor agonist
4376	-14.34	cp	BRD-K08973992	linoleic-acid	Oxidative stress inducer		FABP4, FFAR1, FFAR4, HNF4A, KCNB1, PPARG, TRPM8	Oxidative stress inducer
4401	-14.77	cp	BRD-K28137194	loreclezole	GABA receptor agonist		GABRB2, GABRB3	GABA receptor agonist
4402	-14.8	cp	BRD-K88759641	EMD-66684	Angiotensin receptor antagonist		AGTR1	Angiotensin receptor antagonist
4403	-14.81	cp	BRD-A05186015	bupropion	Dopamine uptake inhibitor		SLC6A2, SLC6A3, CHRNA3, CYP2B6	Dopamine uptake inhibitor
4407	-14.89	cp	BRD-K16977723	PP-3	EGFR inhibitor			EGFR inhibitor
4419	-15.12	cp	BRD-A45499626	UBP-302	Glutamate receptor antagonist		GRIK1	Glutamate receptor antagonist
4421	-15.13	cp	BRD-K38197229	bumetanide	Solute carrier family member inhibitor		SLC12A1, SLC12A2, CFTR, GPR35, SLC12A4, SLC12A5	Solute carrier family member inhibitor
4427	-15.22	cp	BRD-K39965020	doconexent	PPAR receptor agonist		FFAR1, PPARA, PTGS1, PTGS2	PPAR receptor agonist
4435	-15.37	cp	BRD-K21853356	RG-14620	EGFR inhibitor		EGFR	EGFR inhibitor
4444	-15.5	cp	BRD-K49456190	prima-1-met	thioredoxin inhibitor		TP53	thioredoxin inhibitor
4454	-15.73	cp	BRD-K19605405	ZM-241385	Adenosine receptor antagonist		ADORA2A, ADORA2B, ADORA1, ADORA3	Adenosine receptor antagonist
4455	-15.77	cp	BRD-K24538644	KUC104502N	-666		OPRK1	-666
4466	-15.91	cp	BRD-K54704028	BAY-36-7620	Glutamate receptor antagonist		GRM1	Glutamate receptor antagonist
4467	-15.92	cp	BRD-A82238138	budesonide	Glucocorticoid receptor agonist		NR3C1, CYP3A5, CYP3A7	Glucocorticoid receptor agonist
4469	-15.95	cp	BRD-A28856712	tetryzoline	Adrenergic receptor agonist			Adrenergic receptor agonist
4475	-15.99	cp	BRD-K51223576	AG-99	Tyrosine kinase inhibitor		EGFR	Tyrosine kinase inhibitor
4480	-16.07	cp	BRD-A11990600	lorazepam	Benzodiazepine receptor agonist		GABRA1, GABRA2, GABRA3, GABRA5, GABRA4, GABRA6, GABRB1, GABRB2, GABRB3, GABRD, GABRE, GABRG1, GABRG2, GABRG3, GABRP, GABRQ, TSPO	Benzodiazepine receptor agonist
4506	-16.65	cp	BRD-K28806945	L-750667	Dopamine receptor antagonist		DRD4	Dopamine receptor antagonist
4508	-16.7	cp	BRD-K71103788	duloxetine	Serotonin reuptake inhibitor		SLC6A2, SLC6A4, SLC6A3, HTR2A, HTR2C, HTR6	Serotonin reuptake inhibitor, Norepinephrine reuptake inhibitor
4511	-16.77	cp	BRD-A83431637	resmethrin	Cytochrome P450 inhibitor			Cytochrome P450 inhibitor
4512	-16.77	cp	BRD-K50417881	eticlopride	Dopamine receptor antagonist		DRD2, DRD3, DRD4	Dopamine receptor antagonist
4520	-16.95	cp	BRD-A96485169	EBPC	Aldose reductase inhibitor		AKR1B1	Aldose reductase inhibitor
4530	-17.11	cp	BRD-K08703257	3-amino-benzamide	PARP inhibitor		PARP1	PARP inhibitor
4531	-17.11	cp	BRD-A73859745	glycodeoxycholic-acid	Apoptosis stimulant			Apoptosis stimulant
4532	-17.14	cp	BRD-K76587808	fraxetin	Antioxidant			Antioxidant
4536	-17.2	cp	BRD-A84134924	pancuronium	Acetylcholine receptor antagonist		CHRM2, CHRM3, CHRNA1, CHRNA2	Acetylcholine receptor antagonist
4541	-17.23	cp	BRD-A56675431	altizide	Thiazide diuretic			Thiazide diuretic
4547	-17.29	cp	BRD-A15034104	bergenin	Interleukin inhibitor		PTPN1	Interleukin inhibitor
4548	-17.3	cp	BRD-K85266041	DNQX	Glutamate receptor antagonist		GRIA1, GRIA2, GRIK1, GRIN1, GRIN2A, GRIN2B	Glutamate receptor antagonist
4550	-17.32	cp	BRD-A22707317	SB-205384	GABA receptor modulator		GABRA3, GABRA5, GABRA6	GABA receptor modulator
4555	-17.46	cp	BRD-K27351809	nomegestrol	Progesterone receptor agonist		PGR	Progesterone receptor agonist
4556	-17.47	cp	BRD-A92585442	RU-28318	Cytochrome P450 inhibitor		NR3C2	Cytochrome P450 inhibitor
4557	-17.48	cp	BRD-K17705806	JTC-801	Opioid receptor antagonist		OPRL1	Opioid receptor antagonist
4559	-17.51	cp	BRD-K85242180	beta-CCP	Indoleamine 2,3-dioxygenase inhibitor		GABRA1, GABRG2, IDO1	Indoleamine 2,3-dioxygenase inhibitor
4562	-17.53	cp	BRD-K15567136	papaverine	Phosphodiesterase inhibitor		PDE10A, PDE4B, PDE5A	Phosphodiesterase inhibitor
4569	-17.66	cp	BRD-A49358627	ciprofibrate	PPAR receptor agonist		PPARA, LPL	PPAR receptor agonist
4571	-17.67	cp	BRD-K89210380	biotin	Vitamin B		ACACA, ACACB, HLCS, MCCC1, MCCC2, PC, PCCA, PCCB, SLC5A6	Vitamin B
4572	-17.68	cp	BRD-A14574269	UB-165	Acetylcholine receptor agonist		CHRNA3, CHRNA4, CHRNB2	Acetylcholine receptor agonist
4573	-17.69	cp	BRD-A55369275	CGP-54626	GABA receptor antagonist		GABBR1, GABBR2, KCTD12, KCTD16, KCTD8	GABA receptor antagonist
4576	-17.7	cp	BRD-K40213712	SAL-1	Adenosine receptor antagonist		ADORA2B, ADORA2A	Adenosine receptor antagonist
4579	-17.8	cp	BRD-K57930253	nitrazepam	Benzodiazepine receptor agonist		GABRA1, GABRA2, GABRA3, GABRA4, GABRA5, GABRA6, GABRB1, GABRB2, GABRB3, GABRD, GABRE, GABRG1, GABRG2, GABRG3, GABRP, GABRQ, GABRR1, GABRR2, GABRR3, SCN1A	Benzodiazepine receptor agonist
4589	-18.03	cp	BRD-K76775527	nimesulide	Cyclooxygenase inhibitor		PTGS2, LTF, PLA2G2E, PTGS1	Cyclooxygenase inhibitor
4590	-18.06	cp	BRD-K78838262	austricine	Hypolipidemic			Hypolipidemic
4594	-18.15	cp	BRD-A16700644	isoxsuprine	Adrenergic receptor agonist		ADRB2	Adrenergic receptor agonist
4600	-18.3	cp	BRD-K51967704	BIIB021	HSP inhibitor		AOX1, HSP90AA1	HSP inhibitor
4607	-18.38	cp	BRD-A87479750	tenidap	Cyclooxygenase inhibitor		ALOX5, KCNJ4, PTGS1	Cyclooxygenase inhibitor
4608	-18.39	cp	BRD-K03600606	catechin	Beta secretase inhibitor		BACE1, CA1, CA12, CA14, CA2, CA4, CA6, CA9, FASN, PTGS1, SCN5A	Beta secretase inhibitor, Fatty acid synthase inhibitor, LDL antioxidant
4614	-18.47	cp	BRD-K41445866	alfaxalone	Chloride channel agonist		HSD11B1	Chloride channel agonist, GABA receptor agonist
4616	-18.53	cp	BRD-K22828899	TUL-XXI039	Serine/threonine kinase inhibitor			Serine/threonine kinase inhibitor
4620	-18.65	cp	BRD-K93645900	tadalafil	Phosphodiesterase inhibitor		PDE5A, PDE11A	Phosphodiesterase inhibitor
4621	-18.65	cp	BRD-K56509348	BMS-182874	Endothelin receptor antagonist		EDNRA	Endothelin receptor antagonist
4623	-18.67	cp	BRD-K55430733	WAY-629	Serotonin receptor agonist		HTR2C	Serotonin receptor agonist
4626	-18.72	cp	BRD-A50157456	terbutaline	Adrenergic receptor agonist		ADRB2	Adrenergic receptor agonist
4629	-18.76	cp	BRD-A08709697	heliotrine	Pyrrolizidine alkaloid			Pyrrolizidine alkaloid
4630	-18.8	cp	BRD-K40892394	AR-C133057XX	Nitric oxide synthase inhibitor		NOS2, NOS1	Nitric oxide synthase inhibitor
4637	-18.87	cp	BRD-K45435259	SCH-23390	Dopamine receptor antagonist		DRD1, DRD5, HTR2C, KCNJ4, KCNJ6	Dopamine receptor antagonist
4639	-18.89	cp	BRD-A83855350	naltrexone	Opioid receptor antagonist		OPRK1, OPRM1, OPRD1, SIGMAR1	Opioid receptor antagonist
4640	-18.92	cp	BRD-K89274813	DMP-543	Acetylcholine release stimulant			Acetylcholine release stimulant
4653	-19.11	cp	BRD-K76274772	MAPP-D-erythro	Ceramidase inhibitor			Ceramidase inhibitor
4661	-19.27	cp	BRD-K32696739	noreleagnine	Monoamine oxidase inhibitor		ADRA2A, ADRA2B, ADRA2C, HTR2A, MAOA, MAOB	Monoamine oxidase inhibitor, Serotonin receptor agonist
4663	-19.33	cp	BRD-K31627533	rimexolone	Glucocorticoid receptor agonist		NR3C1, SERPINA6	Glucocorticoid receptor agonist
4664	-19.33	cp	BRD-K16444452	ibudilast	Leukotriene receptor antagonist		PDE4A, PDE4B, PDE4C, MIF, PDE10A, PDE3A, PDE4D, TLR4, CYSLTR1, IL1B, IL6, PDE11A, PDE5A	Leukotriene receptor antagonist, Phosphodiesterase inhibitor
4665	-19.35	cp	BRD-K40619305	larixinic-acid	Compound that interacts with metal centers			Compound that interacts with metal centers
4668	-19.35	cp	BRD-A09056319	alfuzosin	Adrenergic receptor antagonist		ADRA1A, ADRA1D, ADRA1B, KCNH2	Adrenergic receptor antagonist
4669	-19.36	cp	BRD-K05350981	oligomycin-c	ATPase inhibitor		ATP5A1	ATPase inhibitor, ATP synthase inhibitor
4671	-19.38	cp	BRD-K04993501	cefixime	Bacterial cell wall synthesis inhibitor			Bacterial cell wall synthesis inhibitor
4681	-19.6	cp	BRD-A53077924	tianeptine	Selective serotonin reuptake enhancer (SSRE)		SLC6A4	Selective serotonin reuptake enhancer (SSRE)
4686	-19.72	cp	BRD-K62056274	quipazine	Serotonin receptor agonist		HTR2A, HTR3A, HTR3B, HTR1A, HTR1D, HTR2B, HTR2C, HTR6, SLC6A4	Serotonin receptor agonist
4687	-19.74	cp	BRD-K17823458	danoprevir	HCV inhibitor			HCV inhibitor
4688	-19.84	cp	BRD-K04877770	FTase-inhibitor-B581	Farnesyltransferase inhibitor			Farnesyltransferase inhibitor
4689	-19.84	cp	BRD-A08187463	racecadotril	Enkephalinase inhibitor		MME	Enkephalinase inhibitor
4690	-19.86	cp	BRD-A77349281	RK-682	Tyrosine phosphatase inhibitor		HPSE, PTPN1	Tyrosine phosphatase inhibitor
4696	-20	cp	BRD-K90574421	ipsapirone	Serotonin receptor agonist		HTR1A	Serotonin receptor agonist
4702	-20.08	cp	BRD-K01612348	meropenem	Bacterial cell wall synthesis inhibitor			Bacterial cell wall synthesis inhibitor
4707	-20.14	cp	BRD-K66353228	zoxazolamine	Myorelaxant			Myorelaxant
4711	-20.22	cp	BRD-K60762818	desipramine	Tricyclic antidepressant		SLC6A2, SLC6A4, ADRA1A, ADRA1B, ADRA1D, ADRA2A, ADRA2B, ADRA2C, ADRB1, ADRB2, CHRM1, CHRM2, CHRM3, CHRM4, CHRM5, DRD2, HRH1, HTR1A, HTR2A, HTR2C, SMPD1	Tricyclic antidepressant
4713	-20.3	cp	BRD-K43245338	MDL-28170	Calpain inhibitor		CAPN1, CTSB, CTSL	Calpain inhibitor
4719	-20.46	cp	BRD-U88459701	atorvastatin	HMGCR inhibitor		HMGCR, DPP4, AHR, CYP3A5, FASLG	HMGCR inhibitor
4720	-20.47	cp	BRD-K77771411	moxonidine	Imidazoline receptor agonist		NISCH, ADRA2A, ADRA2B, ADRA2C	Imidazoline receptor agonist
4722	-20.53	cp	BRD-K64994968	progesterone	Progesterone receptor agonist		PGR, CYP17A1, NR3C2, CATSPER1, CATSPER2, CATSPER3, CATSPER4, CYP2C19, ESR1, OPRK1, TRPC5	Progesterone receptor agonist
4732	-20.66	cp	BRD-K53545112	CNQX	Glutamate receptor antagonist		GRIA1, GRIA2, GRIA3, GRIA4	Glutamate receptor antagonist
4735	-20.71	cp	BRD-K68332390	ponalrestat	Aldose reductase inhibitor		AKR1B1	Aldose reductase inhibitor
4736	-20.72	cp	BRD-A55594068	vinblastine	Microtubule inhibitor		TUBB, JUN, TUBA1A, TUBD1, TUBE1, TUBG1	Microtubule inhibitor, Tubulin inhibitor
4737	-20.72	cp	BRD-A77722753	hydralazine	Vasodilator		AOC3, P4HA1	Vasodilator
4738	-20.75	cp	BRD-A15415227	GW-1929	PPAR receptor agonist		INS, PPARG	PPAR receptor agonist, Insulin sensitizer
4740	-20.77	cp	BRD-A41833852	naloxone	Opioid receptor antagonist		OPRM1, OPRK1, OPRD1, CREB1, ESR1, TLR4	Opioid receptor antagonist
4741	-20.78	cp	BRD-K55424922	anpirtoline	Serotonin receptor agonist		HTR1B, HTR3A	Serotonin receptor agonist
4747	-20.87	cp	BRD-A19736161	ondansetron	Serotonin receptor antagonist		HTR3A, CYP2D6, CYP3A5, HTR1A, HTR1B, HTR3B, HTR4, OPRM1	Serotonin receptor antagonist
4750	-20.94	cp	BRD-K47639036	flavoxate	Acetylcholine receptor antagonist		CHRM1, CHRM2	Acetylcholine receptor antagonist
4753	-21.01	cp	BRD-A42759514	ornidazole	Antiprotozoal			Antiprotozoal
4757	-21.04	cp	BRD-K97799481	theophylline	Adenosine receptor antagonist		ADORA1, ADORA2A, ADORA2B, ADORA3, CHIA, CYP2E1, CYP3A4, HDAC2, PDE3A, PDE4A, PDE4B, PDE5A	Adenosine receptor antagonist
4768	-21.17	cp	BRD-K77175907	calcifediol	Vitamin D receptor agonist		VDR	Vitamin D receptor agonist
4772	-21.24	cp	BRD-A49734948	foliosidine	Plant alkaloid			Plant alkaloid
4777	-21.33	cp	BRD-K39391626	ethylestrenol	Progesterone receptor agonist		AR	Progesterone receptor agonist
4781	-21.39	cp	BRD-A34706053	CGP-12177	Adrenergic receptor agonist		ADRB1, ADRB2, ADRB3	Adrenergic receptor agonist
4783	-21.4	cp	BRD-K63913457	eicosatrienoic-acid	Vasodilator			Vasodilator
4788	-21.51	cp	BRD-K10136726	tosyllysyl-chloromethyl-ketone	Chymotrypsin inhibitor			Chymotrypsin inhibitor
4792	-21.63	cp	BRD-K14920963	erythrosine	Coloring agent			Coloring agent
4795	-21.7	cp	BRD-K08890269	CO-102862	Sodium channel blocker		SCN2A, SCN4A, SCN9A	Sodium channel blocker
4797	-21.73	cp	BRD-K10961822	latanoprost	Prostanoid receptor agonist		PTGFR	Prostanoid receptor agonist
4799	-21.75	cp	BRD-A50764878	MDL-73005EF	Serotonin receptor antagonist		HTR1A	Serotonin receptor antagonist
4801	-21.76	cp	BRD-K30697463	desoximetasone	Glucocorticoid receptor agonist		NR3C1, PLA2G1B	Glucocorticoid receptor agonist
4805	-21.81	cp	BRD-K18799075	BAY-59-3074	Cannabinoid receptor partial agonist		CNR1, CNR2	Cannabinoid receptor partial agonist
4818	-22.12	cp	BRD-A97479839	piperidolate	Acetylcholine receptor antagonist		CHRM1	Acetylcholine receptor antagonist
4822	-22.14	cp	BRD-K76205745	losartan	Angiotensin receptor antagonist		AGTR1	Angiotensin receptor antagonist
4826	-22.29	cp	BRD-K84141129	VU-0400193-3	Glutamate receptor modulator		GRM4	Glutamate receptor modulator
4828	-22.33	cp	BRD-A14395271	mesoridazine	Dopamine receptor antagonist		DRD2, HTR2A	Dopamine receptor antagonist
4831	-22.41	cp	BRD-A06726973	dibutyrylcyclic-gmp	cGMP analog			cGMP analog
4834	-22.46	cp	BRD-K61737877	VEGF-receptor-2-kinase-inhibitor-IV	VEGFR inhibitor		KDR	VEGFR inhibitor
4838	-22.55	cp	BRD-K48722833	iloperidone	Dopamine receptor antagonist		DRD2, HTR2A, HTR1A, HTR6, HTR7, ADRA1A, ADRA2C, DRD1, DRD3, DRD4, HRH1	Dopamine receptor antagonist, Serotonin receptor antagonist
4843	-22.69	cp	BRD-K37194137	III606050	Cytochrome P450 inhibitor			Cytochrome P450 inhibitor
4846	-22.73	cp	BRD-K13819402	desoxypeganine	Acetylcholinesterase inhibitor		ACHE, MAOA	Acetylcholinesterase inhibitor, Monoamine oxidase inhibitor
4847	-22.74	cp	BRD-K35240538	methylprednisolone	Glucocorticoid receptor agonist		NR3C1	Glucocorticoid receptor agonist
4849	-22.76	cp	BRD-K25741894	skimmianine	Acetylcholinesterase inhibitor			Acetylcholinesterase inhibitor, Furoquinoline alkaloid
4859	-22.95	cp	BRD-K56064827	EI-273	PKC inhibitor		PRKCA, PRKCG	PKC inhibitor
4862	-23	cp	BRD-K12079898	PD-160170	Neuropeptide receptor antagonist		NPY1R	Neuropeptide receptor antagonist
4863	-23.06	cp	BRD-A06390036	hydroquinidine	Antiarrhythmic			Antiarrhythmic
4864	-23.09	cp	BRD-K56450366	NSC-94258	Antineoplastic		AKR1B1, CYP19A1, HSD17B1	Antineoplastic
4866	-23.1	cp	BRD-K93441486	diphemanil	Acetylcholine receptor antagonist		CHRM3	Acetylcholine receptor antagonist
4869	-23.13	cp	BRD-K72024482	MRS-1754	Adenosine receptor antagonist		ADORA2B, ADORA1, ADORA2A, ADORA3	Adenosine receptor antagonist
4873	-23.17	cp	BRD-K40887525	ritanserin	Serotonin receptor antagonist		HTR2A, HTR2C, HTR2B, ADRA1A, ADRA1B, ADRA1D, HTR1A, HTR1B, HTR1D, HTR5A, HTR6, HTR7	Serotonin receptor antagonist
4875	-23.25	cp	BRD-K64044582	linoleamide	ACAT inhibitor		SOAT1, SOAT2	ACAT inhibitor
4880	-23.32	cp	BRD-K14965640	ibuprofen	Cyclooxygenase inhibitor		PTGS2, PTGS1, ASIC1, BCL2, CFTR, CYP2C8, FABP2, PLAT, PPARG, SLC5A8, THBD	Cyclooxygenase inhibitor
4885	-23.39	cp	BRD-K08115555	tyrphostin-AG-1288	TNF production inhibitor		COMT	TNF production inhibitor
4887	-23.42	cp	BRD-K56047318	RHC-80267	Triacylglycerol lipase inhibitor		DAGLA, DAGLB, LIPC, LIPE, LIPG	Triacylglycerol lipase inhibitor
4891	-23.52	cp	BRD-A10715913	sulpiride	Dopamine receptor antagonist		DRD2, CA7, DRD3, CA1, CA12	Dopamine receptor antagonist
4899	-23.62	cp	BRD-K80725821	RS-16566	Serotonin receptor antagonist			Serotonin receptor antagonist
4903	-23.66	cp	BRD-A11605036	thiocolchicoside	GABA receptor antagonist		GABRA1, GABRB2, GABRG2, GLRA1, GLRB	GABA receptor antagonist
4906	-23.7	cp	BRD-K62200014	anagrelide	Phosphodiesterase inhibitor		PDE3A	Phosphodiesterase inhibitor
4913	-23.85	cp	BRD-K63784565	BRD-K63784565	Topoisomerase inhibitor		TOP1	Topoisomerase inhibitor
4915	-23.87	cp	BRD-K96134740	kitasamycin	Protein synthesis inhibitor			Protein synthesis inhibitor
4918	-23.89	cp	BRD-A62434282	goserelin	Gonadotropin releasing factor hormone receptor agonist		GNRHR, GNRH1, LHCGR	Gonadotropin releasing factor hormone receptor agonist, Luteinizing hormone releasing hormone agonist
4921	-23.95	cp	BRD-K52080565	rilmenidine	Imidazoline receptor agonist		NISCH	Imidazoline receptor agonist
4923	-24	cp	BRD-K27184429	levocetirizine	Histamine receptor antagonist		HRH1, CXCL8	Histamine receptor antagonist
4928	-24.04	cp	BRD-K39621635	artemether	Antimalarial		ATP1A1, CYP2B6, CYP2C19, CYP3A5	Antimalarial
4931	-24.14	cp	BRD-K00675675	CL-82198	Metalloproteinase inhibitor		MMP13	Metalloproteinase inhibitor
4935	-24.2	cp	BRD-K75699339	rizatriptan	Serotonin receptor agonist		HTR1D, HTR1B, HTR1F, HTR1A, HTR1E	Serotonin receptor agonist
4940	-24.3	cp	BRD-K08109516	L-701324	Glutamate receptor antagonist		GRIN1, GRIN2A, GRIN2B, GRIN2C, GRIN2D	Glutamate receptor antagonist
4943	-24.35	cp	BRD-K52620403	STO-609	Calmodulin antagonist		CAMKK1, CAMKK2	Calmodulin antagonist
4944	-24.37	cp	BRD-A54596827	solifenacin	Acetylcholine receptor antagonist		CHRM3, CHRM1, CHRM2, CHRM4, CHRM5	Acetylcholine receptor antagonist
4946	-24.44	cp	BRD-K11742128	triprolidine	Histamine receptor antagonist		HRH1	Histamine receptor antagonist
4948	-24.47	cp	BRD-K67831364	ZM-323881	VEGFR inhibitor		KDR	VEGFR inhibitor
4949	-24.54	cp	BRD-A53576514	orphenadrine	Acetylcholine receptor antagonist		CYP2B6, GRIN1, GRIN2D, GRIN3A, GRIN3B, HRH1, SCN10A, SLC6A2	Acetylcholine receptor antagonist
4954	-24.6	cp	BRD-K32755366	reserpic-acid	Norepinephrine transporter inhibitor			Norepinephrine transporter inhibitor
4960	-24.7	cp	BRD-A34255068	rolipram	Phosphodiesterase inhibitor		PDE4A, PDE4B, PDE4D, PDE4C, PDE5A	Phosphodiesterase inhibitor, Interleukin receptor antagonist
4962	-24.8	cp	BRD-K82983861	GW-0742	PPAR receptor agonist		INS, PPARD	PPAR receptor agonist, Insulin sensitizer
4964	-24.81	cp	BRD-K98769987	flumazenil	Benzodiazepine receptor antagonist		GABRA1, GABRA2, GABRA3, GABRA5, GABRA4, GABRA6, GABRB1, GABRB2, GABRB3, GABRD, GABRE, GABRG1, GABRG2, GABRG3, GABRP, GABRQ	Benzodiazepine receptor antagonist
4966	-24.84	cp	BRD-K52172416	anastrozole	Aromatase inhibitor		CYP19A1	Aromatase inhibitor
4975	-25	cp	BRD-K42142750	retrorsine	Antimitotic			Antimitotic, Cytotoxic agent, Mutagenic
4980	-25.15	cp	BRD-K81839095	estrone	Estrogen receptor agonist		ESR1, ESR2	Estrogen receptor agonist, Estrogenic hormone
4983	-25.22	cp	BRD-K94830329	ataluren	CFTR channel agonist		CFTR, DMD, F8, F9	CFTR channel agonist, Dystrophin stimulant
4984	-25.25	cp	BRD-K97509413	coumestrol	Estrogen receptor agonist		ESR1, ESR2	Estrogen receptor agonist
4989	-25.34	cp	BRD-A35519318	benidipine	Calcium channel blocker		CACNA1C, CACNA1G, CYP3A5	Calcium channel blocker
4991	-25.39	cp	BRD-A20239487	atenolol	Adrenergic receptor antagonist		ADRB1, ADRB2	Adrenergic receptor antagonist
4992	-25.4	cp	BRD-K96402602	farnesylthiotriazole	PPMTase inhibitor			PPMTase inhibitor
4993	-25.41	cp	BRD-A75479906	rimantadine	Antiviral			Antiviral, RNA synthesis inhibitor
4995	-25.45	cp	BRD-K31792052	pifithrin	Interleukin receptor antagonist			Interleukin receptor antagonist
5004	-25.69	cp	BRD-K57033106	tripelennamine	Histamine receptor antagonist		HRH1	Histamine receptor antagonist
5007	-25.79	cp	BRD-K40902647	vincamine	Adrenergic receptor antagonist		CHRM1, CHRM2, CHRM3, CHRM4	Adrenergic receptor antagonist
5012	-25.9	cp	BRD-K53414658	tivozanib	VEGFR inhibitor		FLT1, FLT4, KDR, KIT, PDGFRA, PDGFRB	VEGFR inhibitor
5013	-25.91	cp	BRD-K31054881	BMY-7378	Adrenergic receptor antagonist		HTR1A, ADRA1D, ADRA1A, ADRA1B	Adrenergic receptor antagonist, Serotonin receptor antagonist
5014	-25.92	cp	BRD-K99498722	NPI-2358	Tubulin inhibitor			Tubulin inhibitor
5019	-26.05	cp	BRD-A48257147	PHCCC	Glutamate receptor agonist		GRM1, GRM4	Glutamate receptor agonist
5025	-26.22	cp	BRD-K81473089	tacrine	Acetylcholinesterase inhibitor		ACHE, BCHE	Acetylcholinesterase inhibitor, Acetylcholine release stimulant, Butyrylcholinesterase inhibitor, Potassium channel antagonist
5028	-26.28	cp	BRD-K95237249	probenecid	Uricosuric blocker		SLC22A6, ABCC1, PANX1, SLC22A11, SLC22A8, SLCO1C1, TRPV2	Uricosuric blocker
5031	-26.32	cp	BRD-K98684188	GSK-0660	PPAR receptor antagonist		PPARD	PPAR receptor antagonist
5033	-26.35	cp	BRD-A12560204	nitrendipine	Calcium channel blocker		CACNA1C, CACNA1D, CACNA2D1, CACNA1H, CACNA1S, CACNA2D2, CACNB2, CACNG1, KCNN4	Calcium channel blocker
5042	-26.54	cp	BRD-A62809825	thapsigargin	ATPase inhibitor		ATP2A1	ATPase inhibitor
5044	-26.56	cp	BRD-K99922388	DPO-1	Potassium channel blocker		KCNA5	Potassium channel blocker
5047	-26.59	cp	BRD-K38449220	seneciphylline	Cytochrome P450 inhibitor			Cytochrome P450 inhibitor
5048	-26.66	cp	BRD-A85025557	NCS-382	GABA receptor antagonist		GABBR1, GABBR2, SLC52A2	GABA receptor antagonist
5052	-26.71	cp	BRD-A64977602	mirtazapine	Adrenergic receptor antagonist		ADRA2A, HTR2A, HTR2C, ADRA2C, HTR3A, ADRA1A, ADRA1B, ADRA1D, ADRA2B, ADRB1, ADRB2, DRD1, DRD2, DRD3, DRD5, HRH1, HRH3, HTR2B, HTR7, OPRK1, SLC6A2, SLC6A3, SLC6A4	Adrenergic receptor antagonist, Serotonin receptor antagonist
5054	-26.73	cp	BRD-K74913225	brinzolamide	Carbonic anhydrase inhibitor		CA2, CA1, CA7, CA12, CA14, CA4, CA5A, CYP2B6, CYP2C8	Carbonic anhydrase inhibitor
5056	-26.77	cp	BRD-K24656285	farnesol	FXR agonist		MAOB, MVK, NR1H4	FXR agonist, Monoamine oxidase inhibitor, NFkB pathway activator, PPAR receptor agonist
5062	-26.93	cp	BRD-A52172093	VU-0413807-2	Calcium channel blocker		CACNA1G, CACNA1H, CACNA1I	Calcium channel blocker
5063	-26.94	cp	BRD-A95869247	indapamide	Thiazide diuretic		KCNQ1, CA7, KCNE1, SLC12A3	Thiazide diuretic
5064	-26.95	cp	BRD-A52588987	SKF-83566	Dopamine receptor antagonist		DRD1, DRD5	Dopamine receptor antagonist
5066	-26.97	cp	BRD-K18574842	nafcillin	Bacterial cell wall synthesis inhibitor		CYP3A4	Bacterial cell wall synthesis inhibitor
5068	-26.98	cp	BRD-K02637541	celecoxib	Cyclooxygenase inhibitor		PTGS2, CA12, CASP3, CYP2C19, PDPK1	Cyclooxygenase inhibitor
5073	-27.07	cp	BRD-K75478907	GS-39783	GABA receptor modulator		GABBR1	GABA receptor modulator
5076	-27.08	cp	BRD-K32645441	dipropyl-5ct	Serotonin receptor agonist		HTR1B, HTR1D, HTR1F, HTR7	Serotonin receptor agonist
5079	-27.13	cp	BRD-K54790157	trioxsalen	DNA synthesis inhibitor			DNA synthesis inhibitor
5081	-27.16	cp	BRD-K70281171	U-99194	Dopamine receptor antagonist		DRD3	Dopamine receptor antagonist
5084	-27.2	cp	BRD-K08640512	RS-100329	Adrenergic receptor antagonist		ADRA1A, ADRA1D	Adrenergic receptor antagonist
5087	-27.24	cp	BRD-A80793822	pemoline	Dopamine receptor agonist			Dopamine receptor agonist
5089	-27.27	cp	BRD-A43882281	pinacidil	ATP channel activator		ABCC9, KCNJ8	ATP channel activator, Potassium channel activator
5093	-27.36	cp	BRD-K10176267	L-701252	Glutamate receptor antagonist		GRIN1	Glutamate receptor antagonist
5097	-27.45	cp	BRD-K88358234	xaliproden	Serotonin receptor agonist		HTR1A	Serotonin receptor agonist
5098	-27.46	cp	BRD-A97674275	ranolazine	Sodium channel blocker		SCN9A, SCN10A, SCN5A, SLC22A2	Sodium channel blocker
5099	-27.46	cp	BRD-K54095730	CMPD-1	p38 MAPK inhibitor		GNRHR, MAPK14	p38 MAPK inhibitor
5101	-27.59	cp	BRD-K66175015	afatinib	EGFR inhibitor		EGFR, ERBB2, ERBB4	EGFR inhibitor
5104	-27.61	cp	BRD-K05434375	HA-1004	Calcium channel blocker			Calcium channel blocker
5107	-27.66	cp	BRD-K32536677	AGK-2	SIRT inhibitor		SIRT2	SIRT inhibitor
5109	-27.69	cp	BRD-K82823076	RO-15-4513	GABA benzodiazepine site receptor inverse agonist		GABRA1, GABRA2, GABRA3, GABRA5, GABRA4, GABRA6, GABRB2, GABRG2	GABA benzodiazepine site receptor inverse agonist
5111	-27.73	cp	BRD-K54759182	dosulepin	Norepinephrine reuptake inhibitor		SLC6A2, SLC6A4, CHRM1, CHRM2, CHRM3, CHRM4, CHRM5, CYP2C19, HRH1	Norepinephrine reuptake inhibitor, Tricyclic antidepressant, Serotonin reuptake inhibitor
5117	-27.85	cp	BRD-K48692744	NU-1025	PARP inhibitor		PARP1	PARP inhibitor, DNA dependent protein kinase inhibitor
5128	-28.07	cp	BRD-K15086322	JNJ-10191584	Histamine receptor antagonist		HRH4	Histamine receptor antagonist
5129	-28.1	cp	BRD-K62996583	lidoflazine	Calcium channel blocker		SCN1A, SCN3A, SLC29A1	Calcium channel blocker
5130	-28.1	cp	BRD-A26095496	clobetasol	Glucocorticoid receptor agonist		NR3C1, PLA2G1B	Glucocorticoid receptor agonist
5135	-28.24	cp	BRD-K74112339	acetohydroxamic-acid	Urease inhibitor			Urease inhibitor
5144	-28.4	cp	BRD-K55748775	SCH-28080	ATPase inhibitor		ATP4A	ATPase inhibitor
5146	-28.43	cp	BRD-A69917777	aminopentamide	Acetylcholine receptor antagonist			Acetylcholine receptor antagonist
5147	-28.44	cp	BRD-K36965586	m-chlorophenylbiguanide	Serotonin receptor agonist		HTR3A, HTR3B	Serotonin receptor agonist
5148	-28.44	cp	BRD-K77677632	SB-200646	Serotonin receptor antagonist		HTR2B, HTR2C	Serotonin receptor antagonist
5152	-28.53	cp	BRD-K64935403	ebelactone-b	Lipase inhibitor		PNLIP	Lipase inhibitor
5153	-28.53	cp	BRD-K33312228	halometasone	Glucocorticoid receptor agonist		NR3C1	Glucocorticoid receptor agonist
5155	-28.56	cp	BRD-A02710418	meptazinol	Opioid receptor agonist		BCHE	Opioid receptor agonist
5161	-28.65	cp	BRD-K26674531	GR-235	Estrogen receptor agonist		ESR1, IKBKB, NR1H4, NR1I2, PGR	Estrogen receptor agonist, FXR antagonist, Progesterone receptor agonist
5166	-28.79	cp	BRD-K01663662	diphenidol	Acetylcholine receptor agonist		CHRM1, CHRM3, CHRM4, CHRM2	Acetylcholine receptor agonist
5169	-28.87	cp	BRD-A80960055	celastrol	Anti-inflammatory		IL1B, TNF	Anti-inflammatory, Antioxidant, NFkB pathway inhibitor, HSP inhibitor, Topoisomerase inhibitor
5170	-28.87	cp	BRD-K19554809	MK-212	Serotonin receptor agonist		HTR2A, HTR2B, HTR2C	Serotonin receptor agonist
5173	-28.93	cp	BRD-K55591206	epigallocatechin	Nitric oxide synthase inhibitor		FASN, APP, BACE1, CYP19A1, DYRK1A, ELANE, ENOX2, EP300, IDO1, KAT2B, KDR, MMP14, MMP2, PPARA, PREP, SLC5A1	Nitric oxide synthase inhibitor, Bacterial DNA gyrase inhibitor
5180	-29.07	cp	BRD-K96084870	DMBI	PDGFR receptor inhibitor		PDGFRB	PDGFR receptor inhibitor, VEGFR inhibitor
5183	-29.09	cp	BRD-K47207162	zimelidine	Serotonin reuptake inhibitor		SLC6A4, MAOA, MAOB	Serotonin reuptake inhibitor
5184	-29.13	cp	BRD-A73680854	PT-630	Dipeptidyl peptidase inhibitor		DPP4, FAP	Dipeptidyl peptidase inhibitor
5188	-29.22	cp	BRD-K71534238	GW-9508	Free fatty acid receptor agonist		FFAR4, FFAR1	Free fatty acid receptor agonist, G protein-coupled receptor agonist
5190	-29.35	cp	BRD-K34441861	moexipril	ACE inhibitor		ACE, ACE2	ACE inhibitor
5193	-29.41	cp	BRD-K70327191	benzoxiquine	Anti-infective			Anti-infective
5194	-29.46	cp	BRD-K54316499	tolterodine	Acetylcholine receptor antagonist		CHRM2, CHRM3, CHRM1, CHRM4, CHRM5	Acetylcholine receptor antagonist
5195	-29.46	cp	BRD-K82941592	rosuvastatin	HMGCR inhibitor		HMGCR	HMGCR inhibitor
5201	-29.64	cp	BRD-K75958195	pizotifen	Serotonin receptor antagonist		HTR2A, HTR1A, HTR2C	Serotonin receptor antagonist
5202	-29.66	cp	BRD-K67352070	TC-2559	Acetylcholine receptor agonist		CHRNA4	Acetylcholine receptor agonist
5207	-29.74	cp	BRD-A79314293	cephalosporanic-acid	Bacterial cell wall synthesis inhibitor			Bacterial cell wall synthesis inhibitor
5211	-29.81	cp	BRD-A93255169	thalidomide	TNF production inhibitor		TNF, CRBN, CYP1A2, CYP2B6, CYP2C19, CYP3A5, FGFR2, NFKB1, ORM1, ORM2, PTGS2	TNF production inhibitor
5214	-29.87	cp	BRD-K92723993	imatinib	BCR-ABL kinase inhibitor		ABL1, KIT, PDGFRA, BCR, CSF1R, PDGFRB, ABCG2, CYP2C19, CYP2C8, CYP3A5, DDR1, NTRK1, RET	BCR-ABL kinase inhibitor, KIT inhibitor, PDGFR receptor inhibitor
5216	-29.91	cp	BRD-A63667919	methylergometrine	Dopamine receptor antagonist		DRD1, HTR1E, HTR1F, HTR2A, HTR2B, HTR2C	Dopamine receptor antagonist, Serotonin receptor antagonist
5218	-29.92	cp	BRD-K21733600	rofecoxib	Cyclooxygenase inhibitor		PTGS2, CYP3A4, ELN	Cyclooxygenase inhibitor
5227	-30.05	cp	BRD-K14221570	benzopurpurin-4b	HIV entry inhibitor			HIV entry inhibitor
5228	-30.07	cp	BRD-K17008822	BD-1008	Sigma receptor antagonist			Sigma receptor antagonist
5229	-30.14	cp	BRD-A72703248	SKF-96365	Calcium channel blocker		CYP3A4, TRPC1, PKD2, TRPC3, TRPC4, TRPC5, TRPV2	Calcium channel blocker
5230	-30.15	cp	BRD-A02713983	dihydrodeoxygedunin	Growth factor receptor activator		NTRK2	Growth factor receptor activator
5232	-30.18	cp	BRD-K84996949	sinensetin	Cyclooxygenase inhibitor			Cyclooxygenase inhibitor
5235	-30.19	cp	BRD-A50311610	meclozine	CAR agonist		NR1I3, HRH1	CAR agonist
5237	-30.25	cp	BRD-A51820102	econazole	Bacterial cell wall synthesis inhibitor		CYP51A1, NPY1R, NPY2R, TRPM2, TRPV5	Bacterial cell wall synthesis inhibitor, Lanosterol demethylase inhibitor, Sterol demethylase inhibitor
5239	-30.28	cp	BRD-K53878242	MMPX	Phosphodiesterase inhibitor			Phosphodiesterase inhibitor
5247	-30.51	cp	BRD-K52522949	NCH-51	HDAC inhibitor		HDAC1, HDAC10, HDAC11, HDAC2, HDAC3, HDAC4, HDAC5, HDAC6, HDAC7, HDAC8, HDAC9	HDAC inhibitor
5248	-30.52	cp	BRD-K88304388	dextrorphan	Glutamate receptor antagonist		OPRM1, OPRK1, OPRD1, GRIN1, HTR1A, SLC6A2	Glutamate receptor antagonist
5249	-30.53	cp	BRD-K96144918	mead-acid	KPL-1 tumor suppressor			KPL-1 tumor suppressor
5250	-30.53	cp	BRD-K56115039	BU-226	Imidazoline receptor ligand			Imidazoline receptor ligand
5251	-30.55	cp	BRD-K42679050	Y-27152	Potassium channel activator		ABCC9, KCNJ8	Potassium channel activator
5258	-30.64	cp	BRD-K95609758	BMS-191011	Potassium channel activator		KCNMA1	Potassium channel activator
5260	-30.7	cp	BRD-K63516691	T-0156	Phosphodiesterase inhibitor		PDE5A	Phosphodiesterase inhibitor
5261	-30.72	cp	BRD-K81528515	nilotinib	ABL inhibitor		ABL1, KIT, BCR, CYP2B6, CYP2C8, DDR1, DDR2, PDGFRA	ABL inhibitor, BCR-ABL kinase inhibitor
5262	-30.75	cp	BRD-K35629949	SR-27897	CCK receptor antagonist		CCKAR	CCK receptor antagonist
5267	-30.83	cp	BRD-K76534306	enrofloxacin	Bacterial DNA gyrase inhibitor			Bacterial DNA gyrase inhibitor
5271	-30.86	cp	BRD-K44084986	Y-27632	Rho associated kinase inhibitor		ROCK1, ROCK2, LRRK2, PKIA, PKN2, PRKACA, PRKCE	Rho associated kinase inhibitor
5274	-30.94	cp	BRD-K18250272	propoxycaine	Local anesthetic			Local anesthetic
5277	-31.05	cp	BRD-A10903566	imiloxan	Adrenergic receptor antagonist		ADRA2B	Adrenergic receptor antagonist
5283	-31.15	cp	BRD-K38436528	imipramine	Norepinephrine reuptake inhibitor		SLC6A2, SLC6A4, CHRM2, ADRA1A, ADRA1B, ADRA1D, CHRM1, CHRM3, CHRM4, CHRM5, CYP2C19, DRD1, DRD2, DRD5, HRH1, HTR1A, HTR2A, HTR2C, HTR6, HTR7, KCND2, KCND3, KCNH1, KCNH2, SLC6A3	Norepinephrine reuptake inhibitor, Serotonin reuptake inhibitor
5284	-31.2	cp	BRD-K34330170	rotenonic-acid	Retinoid receptor antagonist			Retinoid receptor antagonist
5289	-31.31	cp	BRD-K55454768	TAS-301	Calcium-calmodulin dependent protein kinase inhibitor		CAMK2A	Calcium-calmodulin dependent protein kinase inhibitor
5302	-31.6	cp	BRD-K29555132	arachidonamide	Cannabinoid receptor agonist		CNR1, CNR2	Cannabinoid receptor agonist
5305	-31.64	cp	BRD-A93477898	PETCM	Caspase activator		CASP3	Caspase activator
5313	-31.78	cp	BRD-A78877355	nefopam	Cyclooxygenase inhibitor			Cyclooxygenase inhibitor
5315	-31.81	cp	BRD-K02607075	tubocurarine	Acetylcholine receptor antagonist		CHRNA2, HTR3A, ACHE, HTR3B, KCNN1, KCNN2, KCNN3, ZACN	Acetylcholine receptor antagonist
5317	-31.85	cp	BRD-K37792168	denbufylline	Phosphodiesterase inhibitor		PDE4A, PDE4B, PDE4D	Phosphodiesterase inhibitor
5319	-31.9	cp	BRD-K37848908	ceforanide	Penicillin binding protein inhibitor			Penicillin binding protein inhibitor
5322	-32	cp	BRD-U97083655	teicoplanin	Bacterial cell wall synthesis inhibitor			Bacterial cell wall synthesis inhibitor
5323	-32.02	cp	BRD-K25905511	buddleoflavonoloside	Acetylcholinesterase inhibitor			Acetylcholinesterase inhibitor
5326	-32.14	cp	BRD-A49160188	donepezil	Acetylcholinesterase inhibitor		ACHE, HTR2A	Acetylcholinesterase inhibitor
5328	-32.14	cp	BRD-K67783091	haloperidol	Dopamine receptor antagonist		DRD2, DRD1, DRD3, HTR2A, CYP3A7, DRD4, DRD5, GRIN2B, HRH1, HTR1A, HTR1D, HTR2B, HTR7, KCNH1	Dopamine receptor antagonist, Psychoactive drug
5329	-32.16	cp	BRD-K24240364	GYKI-52466	Glutamate receptor antagonist		GRIA1, GRIA2, GRIA3, GRIA4	Glutamate receptor antagonist, Kainate receptor antagonist
5330	-32.17	cp	BRD-A25234499	aminoglutethimide	Glucocorticoid receptor antagonist		CYP19A1, CYP11A1, NR3C1	Glucocorticoid receptor antagonist
5332	-32.19	cp	BRD-K95739795	tetrabenazine	Vesicular monoamine transporter inhibitor		SLC18A2, DRD2, SLC18A1	Vesicular monoamine transporter inhibitor
5334	-32.22	cp	BRD-A46393198	tetramisole	Immunostimulant			Immunostimulant
5335	-32.24	cp	BRD-K96263742	GW-7647	PPAR receptor agonist		PPARA	PPAR receptor agonist
5339	-32.27	cp	BRD-K59597909	phenothiazine	Dopamine receptor antagonist			Dopamine receptor antagonist
5340	-32.34	cp	BRD-A04352665	maraviroc	CC chemokine receptor antagonist		CCR5, CYP3A5	CC chemokine receptor antagonist
5342	-32.38	cp	BRD-K41707108	ceramide	Phosphoenolpyruvate carboxylase activator			Phosphoenolpyruvate carboxylase activator, Serine/threonine protein phosphatase activator
5343	-32.41	cp	BRD-K28115081	apafant	Platelet activating factor receptor antagonist		PTAFR	Platelet activating factor receptor antagonist
5344	-32.46	cp	BRD-A70268693	PG-9	Acetylcholine receptor agonist			Acetylcholine receptor agonist
5345	-32.47	cp	BRD-K64310881	MW-STK33-3B	Potassium channel activator			Potassium channel activator
5347	-32.5	cp	BRD-K16551401	PNU-22394	Serotonin receptor agonist		MAOA, MAOB	Serotonin receptor agonist
5348	-32.51	cp	BRD-K25875056	SC-9	Protein tyrosine kinase activator			Protein tyrosine kinase activator
5349	-32.52	cp	BRD-A35511923	L-803087	Somatostatin receptor agonist		SSTR4	Somatostatin receptor agonist
5358	-32.62	cp	BRD-K66782112	BRD-K66782112	Histamine receptor antagonist		HRH2	Histamine receptor antagonist
5360	-32.64	cp	BRD-A46179541	doxapram	Potassium channel blocker		KCNK3, KCNK9	Potassium channel blocker
5364	-32.67	cp	BRD-K94070024	depomedrol	Glucocorticoid receptor agonist			Glucocorticoid receptor agonist
5365	-32.69	cp	BRD-K16621777	enobosarm	Androgen receptor modulator		AR	Androgen receptor modulator
5366	-32.7	cp	BRD-K71035033	masitinib	KIT inhibitor		KIT, FGFR3, LYN, PDGFRA, PDGFRB	KIT inhibitor, PDGFR receptor inhibitor, SRC inhibitor
5375	-32.96	cp	BRD-K12120659	GR-144053	Integrin antagonist		ITGB3, ITGA2B	Integrin antagonist
5378	-33.08	cp	BRD-K05901394	terguride	Dopamine receptor agonist		DRD2, HTR2A, HTR2B, ADRA1A, ADRA2A, ADRA2B, ADRA2C, DRD3, DRD4, HTR1A, HTR1B, HTR1D, HTR2C, PRL	Dopamine receptor agonist, Serotonin receptor antagonist
5381	-33.17	cp	BRD-A41722204	sulmazole	Adenosine receptor antagonist			Adenosine receptor antagonist
5386	-33.25	cp	BRD-K67102207	phenylbutyrate	HDAC inhibitor		CYP3A5, HDAC1	HDAC inhibitor
5389	-33.34	cp	BRD-K97564742	mepyramine	Histamine receptor antagonist		HRH1	Histamine receptor antagonist
5392	-33.4	cp	BRD-K86873305	piperacillin	Bacterial cell wall synthesis inhibitor			Bacterial cell wall synthesis inhibitor
5402	-33.59	cp	BRD-K02581333	protein-tyrosine-phosphatase-inhibitor-IV	Tyrosine phosphatase inhibitor		PTPN1, PTPN11	Tyrosine phosphatase inhibitor
5406	-33.69	cp	BRD-K65146499	nabumetone	Cyclooxygenase inhibitor		PTGS2, AKR1C3, CYP2B6, CYP2C19, CYP2E1, PTGS1	Cyclooxygenase inhibitor
5411	-33.74	cp	BRD-K02950022	BMS-299897	Gamma secretase inhibitor			Gamma secretase inhibitor
5412	-33.75	cp	BRD-K15933101	ropinirole	Dopamine receptor agonist		DRD2, DRD3, ADRA2A, ADRA2B, ADRA2C, DRD1, DRD4, DRD5, HTR1A, HTR1B, HTR1D, HTR2A, HTR2B, HTR2C	Dopamine receptor agonist
5416	-33.89	cp	BRD-K21565985	xylazine	Adrenergic receptor agonist		ADRA2A, ADRA2B, ADRA2C	Adrenergic receptor agonist
5418	-33.95	cp	BRD-A39230911	chlorphensin	Muscle relaxant			Muscle relaxant
5419	-33.97	cp	BRD-K03842655	penitrem-a	Potassium channel blocker		KCNMA1	Potassium channel blocker
5421	-34	cp	BRD-K67017579	cilostazol	Phosphodiesterase inhibitor		PDE3A, CYP2C19, CYP3A5, PDE3B	Phosphodiesterase inhibitor
5424	-34.09	cp	BRD-A92670106	tocainide	Sodium channel blocker		SCN5A	Sodium channel blocker
5428	-34.14	cp	BRD-K13261168	LY-16350	Dopamine receptor agonist		DRD2, DRD3	Dopamine receptor agonist
5431	-34.21	cp	BRD-U01690642	acetyl-geranyl-cysteine	Isoprenylated protein methylation inhibitor			Isoprenylated protein methylation inhibitor
5433	-34.22	cp	BRD-K47539947	tetradecylthioacetic-acid	Lipid peroxidase inhibitor			Lipid peroxidase inhibitor
5440	-34.42	cp	BRD-K60640630	mometasone	Glucocorticoid receptor agonist		NR3C1	Glucocorticoid receptor agonist, Immunosuppressant
5441	-34.43	cp	BRD-A66199457	asiaticoside	Antineoplastic			Antineoplastic
5447	-34.52	cp	BRD-A70731303	avrainvillamide-analog-5	nucleophosmin inhibitor		NPM1	nucleophosmin inhibitor
5449	-34.57	cp	BRD-A64227845	SKF-77434	Dopamine receptor agonist		DRD1	Dopamine receptor agonist
5452	-34.62	cp	BRD-K89375097	pirenzepine	Acetylcholine receptor antagonist		CHRM1, CHRM2, CHRM3, CHRM4, CHRM5	Acetylcholine receptor antagonist
5456	-34.7	cp	BRD-A02990301	lofexidine	Adrenergic receptor agonist		ADRA2A	Adrenergic receptor agonist
5457	-34.7	cp	BRD-A78377521	monastrol	Kinesin-like spindle protein inhibitor		KIF11	Kinesin-like spindle protein inhibitor
5460	-34.71	cp	BRD-A02176148	tubaic-acid	Mitochondrial complex I inhibitor		MT-ND1	Mitochondrial complex I inhibitor, NADH-ubiquinone oxidoreductase (Complex I) inhibitor
5465	-34.92	cp	BRD-A67981824	cefotaxime	Bacterial cell wall synthesis inhibitor			Bacterial cell wall synthesis inhibitor
5475	-35.11	cp	BRD-K47943470	tyrphostin-51	EGFR inhibitor			EGFR inhibitor
5479	-35.15	cp	BRD-K01567962	pyrazolanthrone	JNK inhibitor		MAPK10, MAPK8, MAPK9, TTK, LRRK2, MAPK8IP1	JNK inhibitor
5480	-35.18	cp	BRD-K83637872	SANT-1	Smoothened receptor antagonist		DHH, IHH, PTCH1, SMO	Smoothened receptor antagonist
5483	-35.32	cp	BRD-K85871428	SC-68376	p38 MAPK inhibitor		MAPK14	p38 MAPK inhibitor
5484	-35.33	cp	BRD-A64297288	amlodipine	Calcium channel blocker		CACNA1C, CACNA1D, CACNA2D1, ABCG2, CA1, CACNA1B, CACNA1S, CACNA2D3, CACNB1, CACNB2, SMPD1	Calcium channel blocker
5485	-35.33	cp	BRD-A18202423	CPCCOEt	Glutamate receptor antagonist		GRM1	Glutamate receptor antagonist
5486	-35.35	cp	BRD-K50135270	GBR-12935	Dopamine uptake inhibitor		AGTR1, SLC6A3	Dopamine uptake inhibitor
5490	-35.46	cp	BRD-K11636097	JNJ-7706621	CDK inhibitor		CDK1, CDK2, AURKA, AURKB	CDK inhibitor
5491	-35.46	cp	BRD-A20131130	2',5'-dideoxyadenosine	Adenylyl cyclase inhibitor			Adenylyl cyclase inhibitor
5493	-35.48	cp	BRD-A50684349	fenoldopam	Dopamine receptor agonist		DRD1, ADRA1A, ADRA1B, ADRA1D, ADRA2A, ADRA2B, ADRA2C, DRD4, DRD5	Dopamine receptor agonist
5495	-35.55	cp	BRD-A14208071	oxyphenonium	Cholinergic receptor antagonist		CHRM1	Cholinergic receptor antagonist
5496	-35.56	cp	BRD-A54880345	etomidate	GABA receptor modulator		GABRA1, ADRA2B, GABRA2, GABRA3, GABRA4, GABRA5, GABRA6, GABRB1, GABRB2, GABRB3, GABRD, GABRE, GABRG1, GABRG2, GABRG3, GABRP, GABRQ	GABA receptor modulator
5498	-35.6	cp	BRD-K02283807	GR-32191	Thromboxane receptor antagonist		TBXA2R	Thromboxane receptor antagonist
5499	-35.61	cp	BRD-K24859147	KIN001-242	Protein kinase inhibitor		RPS6KA3	Protein kinase inhibitor
5500	-35.62	cp	BRD-A07000685	hydrocortisone	Glucocorticoid receptor agonist		ANXA1, NOS2, NR3C1, NR3C2	Glucocorticoid receptor agonist
5503	-35.69	cp	BRD-K66615216	moxifloxacin	Bacterial DNA gyrase inhibitor		TOP2A	Bacterial DNA gyrase inhibitor
5505	-35.75	cp	BRD-K49890030	gavestinel	Glutamate receptor antagonist		GLRB	Glutamate receptor antagonist
5509	-35.79	cp	BRD-A80928489	1-monopalmitin	P-glycoprotein inhibitor		ABCB1	P-glycoprotein inhibitor
5510	-35.82	cp	BRD-K96319534	phentermine	Dopamine uptake inhibitor		MAOA, MAOB, SLC6A2, SLC6A3, SLC6A4	Dopamine uptake inhibitor, Serotonin reuptake inhibitor
5517	-35.91	cp	BRD-K30649484	mafenide	Carbonic anhydrase inhibitor		CA6, CA12, CA14, CA2, CA4, CA9	Carbonic anhydrase inhibitor
5518	-35.93	cp	BRD-A71657825	2-(biphenyl-4-ylsulfonamido)pentanedioic-acid	Matrix metalloprotease inhibitor		MMP13, MMP8, MMP9	Matrix metalloprotease inhibitor
5519	-35.94	cp	BRD-K25186396	tangeritin	Cell cycle inhibitor			Cell cycle inhibitor
5521	-36.04	cp	BRD-K50018155	RS-67506	Serotonin receptor partial agonist		HTR4	Serotonin receptor partial agonist
5523	-36.09	cp	BRD-K87573634	propylpyrazole	Estrogen receptor agonist		ESR1	Estrogen receptor agonist
5524	-36.09	cp	BRD-K33396764	alpha-linolenic-acid	Omega 3 fatty acid stimulant		ELOVL4, FADS1, FADS2, FFAR1, FFAR4, PTGS2, SLC8A1, TRPV1	Omega 3 fatty acid stimulant
5529	-36.19	cp	BRD-A91699651	chloroquine	Antimalarial		CYP2C8, GSTA2, MRGPRX1, TLR9, TNF	Antimalarial
5530	-36.21	cp	BRD-A74500471	ethambutol	Bacterial cell wall synthesis inhibitor			Bacterial cell wall synthesis inhibitor
5534	-36.28	cp	BRD-K59851896	calycanthine	GABA release inhibitor			GABA release inhibitor
5538	-36.31	cp	BRD-A81866333	CGS-21680	Adenosine receptor agonist		ADORA2A, ADORA1, ADORA2B, ADORA3	Adenosine receptor agonist
5542	-36.33	cp	BRD-K70358946	aripiprazole	Serotonin receptor agonist		DRD2, HTR1A, HTR2A, HRH1, HTR1B, HTR1D, HTR2C, ADRA1A, ADRA1B, ADRA2A, ADRA2B, ADRA2C, CHRM1, CHRM2, CHRM3, CHRM4, CHRM5, DRD1, DRD3, DRD4, DRD5, HTR1E, HTR3A, HTR6, HTR7	Serotonin receptor agonist, Serotonin receptor antagonist
5543	-36.33	cp	BRD-K36927236	glibenclamide	Sulfonylurea		KCNJ11, ABCC8, CFTR, KCNJ5, KCNJ8, ABCA1, ABCB11, ABCC9, CPT1A, KCNJ1, SLCO2B1, TRPA1	Sulfonylurea
5546	-36.39	cp	BRD-A90131694	alclometasone	Glucocorticoid receptor agonist		NR3C1, SERPINA6	Glucocorticoid receptor agonist, Immunosuppressant
5547	-36.4	cp	BRD-A04553218	chlorphenamine	Histamine receptor antagonist		HRH1, SLC6A2, SLC6A3, SLC6A4	Histamine receptor antagonist
5553	-36.56	cp	BRD-K14765469	vesamicol	Acetylcholinesterase inhibitor		SLC18A3	Acetylcholinesterase inhibitor
5554	-36.57	cp	BRD-K44899736	RO-16-6941	Monoamine oxidase inhibitor			Monoamine oxidase inhibitor
5556	-36.6	cp	BRD-K81225797	SCH-58261	Adenosine receptor antagonist		ADORA2A, ADORA1, ADORA2B, ADORA3	Adenosine receptor antagonist
5557	-36.64	cp	BRD-K75089421	procainamide	Sodium channel blocker		SCN5A, DNMT1	Sodium channel blocker
5563	-36.73	cp	BRD-K82147103	lofepramine	Norepinephrine reuptake inhibitor		SLC6A2, SLC6A4	Norepinephrine reuptake inhibitor, Serotonin reuptake inhibitor
5577	-37.05	cp	BRD-K88742110	BRD-K88742110	HDAC inhibitor		HDAC8, IL1B	HDAC inhibitor
5581	-37.13	cp	BRD-A65550283	ginsenoside	Steroid hormone receptor agonist			Steroid hormone receptor agonist
5584	-37.2	cp	BRD-A71262238	nafadotride	Dopamine receptor antagonist		DRD3, DRD2, HTR1A	Dopamine receptor antagonist
5587	-37.27	cp	BRD-A36066264	estradiol-benzoate	Estrogen receptor agonist		ESR1	Estrogen receptor agonist
5588	-37.29	cp	BRD-K06208435	YS-035	Calcium channel blocker			Calcium channel blocker
5589	-37.29	cp	BRD-K00312224	PPT	Estrogen receptor agonist		ESR1	Estrogen receptor agonist
5594	-37.37	cp	BRD-K59753853	MDL-29951	Glutamate receptor antagonist		FBP1, GPR17	Glutamate receptor antagonist
5598	-37.41	cp	BRD-A35912562	pregnenolone	Glutamate receptor modulator		CYP17A1, PGR, SULT2B1	Glutamate receptor modulator, Acetylcholine release enhancer, Dopamine release enhancer, GABA receptor negative allosteric modulator
5603	-37.48	cp	BRD-K97810537	beclometasone	Glucocorticoid receptor agonist		NR3C1, CYP3A5, GPR97, SERPINA6	Glucocorticoid receptor agonist, Immunosuppressant
5607	-37.61	cp	BRD-K51751936	alfadolone	GABA receptor agonist			GABA receptor agonist
5608	-37.64	cp	BRD-K18618618	cimetidine	Histamine receptor antagonist		HRH2, SLC29A4, SLC47A1, SLC47A2	Histamine receptor antagonist
5614	-37.68	cp	BRD-A45140972	meclocycline	Bacterial 30S ribosomal subunit inhibitor			Bacterial 30S ribosomal subunit inhibitor, Bacterial 50S ribosomal subunit inhibitor
5616	-37.69	cp	BRD-K57926513	tyrphostin-AG-1295	PDGFR receptor inhibitor		FLT3, KDR, PDGFRA, PDGFRB	PDGFR receptor inhibitor
5619	-37.71	cp	BRD-K45033733	famciclovir	DNA polymerase inhibitor			DNA polymerase inhibitor
5623	-37.94	cp	BRD-K08619838	tremorine	Acetylcholine receptor agonist			Acetylcholine receptor agonist
5627	-38.02	cp	BRD-K12513978	fenbufen	Cyclooxygenase inhibitor		PTGS1, PTGS2	Cyclooxygenase inhibitor
5635	-38.16	cp	BRD-K22193694	dioxybenzone	Topical sunscreen agent			Topical sunscreen agent
5636	-38.2	cp	BRD-K90976994	dehydrocholic-acid	Bile acid			Bile acid
5643	-38.35	cp	BRD-K85133207	HDAC1-selective	HDAC inhibitor			HDAC inhibitor
5648	-38.43	cp	BRD-A31575449	CGP-20712	Adrenergic receptor antagonist		ADRB1, ADRB3	Adrenergic receptor antagonist
5655	-38.6	cp	BRD-K62959606	sphingosine	Ceramidase inhibitor		GLTP, PVR, TRPM3	Ceramidase inhibitor
5662	-38.71	cp	BRD-K01648091	LE-300	Dopamine receptor antagonist		DRD5, DRD1, HTR2A	Dopamine receptor antagonist
5665	-38.77	cp	BRD-A87387433	cefpodoxime	Bacterial cell wall synthesis inhibitor			Bacterial cell wall synthesis inhibitor
5672	-38.96	cp	BRD-K02275692	cefotiam	Bacterial cell wall synthesis inhibitor			Bacterial cell wall synthesis inhibitor
5675	-39.05	cp	BRD-A39390670	rabeprazole	ATPase inhibitor		ATP4A, CYP2C19	ATPase inhibitor, Gastrin inhibitor
5677	-39.07	cp	BRD-K18316707	O-1918	Cannabinoid receptor antagonist			Cannabinoid receptor antagonist
5680	-39.2	cp	BRD-K00673382	famotidine	Histamine receptor antagonist		HRH2	Histamine receptor antagonist
5681	-39.24	cp	BRD-K13926615	vardenafil	Phosphodiesterase inhibitor		PDE5A, CYP2C19, CYP2C8, CYP3A5, PDE6G, PDE6H	Phosphodiesterase inhibitor
5682	-39.25	cp	BRD-A00993607	alprenolol	Adrenergic receptor antagonist		ADRB1, ADRB2, HTR1A	Adrenergic receptor antagonist
5684	-39.33	cp	BRD-K60460488	nelfinavir	HIV protease inhibitor		CYP2C19, CYP3A5, CYP3A7	HIV protease inhibitor
5687	-39.36	cp	BRD-K12219985	glipizide	Sulfonylurea		ABCC8, KCNJ10, KCNJ11, PPARG	Sulfonylurea
5706	-39.69	cp	BRD-K71926323	marbofloxacin	Bacterial DNA gyrase inhibitor			Bacterial DNA gyrase inhibitor
5709	-39.8	cp	BRD-K07237224	moclobemide	Monoamine oxidase inhibitor		MAOA, CYP2C19, MAOB	Monoamine oxidase inhibitor
5711	-39.87	cp	BRD-K02123250	JNJ-38877605	Tyrosine kinase inhibitor		MET	Tyrosine kinase inhibitor
5713	-39.91	cp	BRD-K45479396	BP-554	Serotonin receptor agonist		HTR1A	Serotonin receptor agonist
5728	-40.25	cp	BRD-K52662033	lidocaine	Histamine receptor agonist		SCN5A, EGFR, SCN10A, SCN9A	Histamine receptor agonist
5734	-40.36	cp	BRD-A18917088	estradiol	Contraceptive agent		ESR1, ESR2, NR1I2, CYP2B6, CYP2C19, CYP2C8, CYP2E1, CYP3A5, CYP3A7, GPER1, KCNMA1	Contraceptive agent, Estrogen receptor agonist
5735	-40.47	cp	BRD-A68929948	DAPT-GSI-IX	Gamma secretase inhibitor			Gamma secretase inhibitor
5736	-40.47	cp	BRD-K20482099	rutin	Antioxidant		AKR1C3, AKR1B1, F10	Antioxidant, Capillary stabilizing agent, Nitric oxide scavenger
5737	-40.48	cp	BRD-K20714604	RS-56812	Serotonin receptor partial agonist		HTR3A	Serotonin receptor partial agonist
5738	-40.51	cp	BRD-A75517195	thiazolopyrimidine	CDC inhibitor			CDC inhibitor
5741	-40.57	cp	BRD-K09764130	mead-ethanolamide	Cannabinoid receptor agonist			Cannabinoid receptor agonist
5747	-40.68	cp	BRD-K82255054	propofol	GABA receptor agonist		CYP2B6, FAAH, GABRA1, GABRA2, GABRA3, GABRA4, GABRA5, GABRA6, GABRB1, GABRB2, GABRB3, GABRD, GABRE, GABRG1, GABRG2, GABRG3, GABRP, GABRQ, SCN2A, SCN4A, TRPV1	GABA receptor agonist
5749	-40.7	cp	BRD-A44090213	indoprofen	Cyclooxygenase inhibitor		PTGS1, PTGS2, CXCR1, CXCR2	Cyclooxygenase inhibitor, Prostanoid receptor antagonist
5750	-40.7	cp	BRD-A09925278	etilefrine	Adrenergic receptor agonist		ADRA1A, ADRB1	Adrenergic receptor agonist
5754	-40.76	cp	BRD-K45861246	azaperone	Dopamine receptor antagonist		DRD2, DRD3	Dopamine receptor antagonist
5755	-40.79	cp	BRD-K72541103	JAK3-inhibitor-I	JAK inhibitor		JAK3	JAK inhibitor
5756	-40.81	cp	BRD-K46742498	alosetron	Serotonin receptor antagonist		HTR3A	Serotonin receptor antagonist
5757	-40.83	cp	BRD-K59574735	ubenimex	Leukotriene inhibitor		LTA4H, ANPEP, RNPEP	Leukotriene inhibitor
5759	-40.84	cp	BRD-K68341547	W-9	Calmodulin antagonist		CALM2	Calmodulin antagonist
5762	-40.93	cp	BRD-K14329163	BAY-K8644	Calcium channel activator		CACNA1C	Calcium channel activator, L-type calcium channel activator
5764	-41.03	cp	BRD-A39268308	epibatidine	Acetylcholine receptor agonist		CHRFAM7A, CHRNA2, CHRNA3, CHRNA4, CHRNA7	Acetylcholine receptor agonist
5767	-41.05	cp	BRD-K21450440	benzthiazide	Carbonic anhydrase inhibitor		CA2, CA1, CA12, CA4, CA9, SLC12A3	Carbonic anhydrase inhibitor
5773	-41.12	cp	BRD-A09533288	verapamil	Calcium channel blocker		CACNA1C, CACNA1D, CACNA1G, CACNA1S, CACNA1A, CACNA1B, CACNA1F, CACNA1I, CACNB1, CACNB2, CACNB3, CACNB4, CYP2C8, CYP2E1, CYP3A4, CYP3A5, CYP3A7, DRD2, KCNA10, KCNA7, KCNH2, KCNJ11, NALCN, SCN5A, SLC29A4, SLC6A4	Calcium channel blocker
5774	-41.13	cp	BRD-K18816859	L-694247	Serotonin receptor agonist		HTR1D, HTR1A, HTR1B	Serotonin receptor agonist
5776	-41.17	cp	BRD-A93659613	GR-89696	Opioid receptor agonist		OPRK1	Opioid receptor agonist
5778	-41.26	cp	BRD-K76908866	CP-724714	EGFR inhibitor		ERBB2	EGFR inhibitor, Receptor tyrosine protein kinase inhibitor, Tyrosine kinase inhibitor
5781	-41.33	cp	BRD-K14807180	SB-221284	Serotonin receptor antagonist		HTR2B, HTR2C, HTR2A	Serotonin receptor antagonist
5784	-41.41	cp	BRD-K04412738	tramadol	Norepinephrine reuptake inhibitor		OPRM1, SLC6A2, SLC6A4, CHRFAM7A, CHRM3, CYP2B6, GRIN3A, HTR2C, OPRD1, OPRK1	Norepinephrine reuptake inhibitor, Opioid receptor agonist, Serotonin reuptake inhibitor
5785	-41.41	cp	BRD-K79145749	dibenzepin	Norepinephrine reuptake inhibitor			Norepinephrine reuptake inhibitor
5789	-41.46	cp	BRD-K01638814	rilmenidine	Adrenergic receptor agonist		NISCH	Adrenergic receptor agonist, Imidazoline receptor agonist
5793	-41.55	cp	BRD-K95763993	trapidil	PDGFR receptor inhibitor		PDGFRA	PDGFR receptor inhibitor
5795	-41.65	cp	BRD-K47679368	bromfenac	Cyclooxygenase inhibitor		PTGS1, PTGS2	Cyclooxygenase inhibitor
5796	-41.68	cp	BRD-K05528470	L-745870	Dopamine receptor antagonist		DRD4, DRD1, DRD2, DRD3, HTR1A, HTR2A, HTR6, HTR7	Dopamine receptor antagonist
5800	-41.71	cp	BRD-A17535965	gelsemine	Acetylcholine receptor antagonist		GLRA3	Acetylcholine receptor antagonist, Glycine receptor antagonist
5803	-41.81	cp	BRD-K11163873	phenanthridone	PARP inhibitor		PARP1	PARP inhibitor
5806	-41.94	cp	BRD-K42095107	daidzein	Estrogen receptor agonist		ESRRA, ESRRB, ESRRG, TRPC5	Estrogen receptor agonist
5812	-42.02	cp	BRD-K01095011	finasteride	5-alpha reductase inhibitor		SRD5A2, SRD5A1, AKR1D1, AR	5-alpha reductase inhibitor
5814	-42.04	cp	BRD-K15502390	nevirapine	Reverse transcriptase inhibitor		CYP2B6, CYP2C19, CYP3A4	Reverse transcriptase inhibitor
5815	-42.04	cp	BRD-K00656370	6-aminochrysene	Transferase inhibitor			Transferase inhibitor
5816	-42.08	cp	BRD-A68631409	evodiamine	ATPase inhibitor		TRPV1	ATPase inhibitor, TRPV agonist
5820	-42.15	cp	BRD-K71289571	zafirlukast	Leukotriene receptor antagonist		CYSLTR1, CYSLTR2	Leukotriene receptor antagonist
5823	-42.24	cp	BRD-K06467078	corynanthine	Adrenergic receptor antagonist			Adrenergic receptor antagonist
5826	-42.32	cp	BRD-K81847782	scandenin	Plant compound with antimicrobial activity			Plant compound with antimicrobial activity
5829	-42.4	cp	BRD-K46556543	canrenoic-acid	Mineralocorticoid receptor antagonist			Mineralocorticoid receptor antagonist
5830	-42.41	cp	BRD-A96882008	L-732138	Tachykinin antagonist		TACR1, TACR2	Tachykinin antagonist
5833	-42.51	cp	BRD-A42346008	metanephrine	Epinephrine metabolite			Epinephrine metabolite
5834	-42.56	cp	BRD-K73196317	urapidil	Adrenergic receptor antagonist		HTR1A	Adrenergic receptor antagonist
5840	-42.74	cp	BRD-A42167015	carteolol	Adrenergic receptor antagonist		ADRB1, ADRB2	Adrenergic receptor antagonist
5841	-42.78	cp	BRD-K64755930	etazolate	Phosphodiesterase inhibitor		GABRB3, PDE4A	Phosphodiesterase inhibitor
5844	-42.86	cp	BRD-K00532621	midazolam	Benzodiazepine receptor agonist		CYP3A5, CYP3A7, GABRA1, GABRA2, GABRA3, GABRA4, GABRA5, GABRA6, GABRB1, GABRB2, GABRB3, GABRD, GABRE, GABRG1, GABRG2, GABRG3, GABRP, GABRQ, GABRR1, GABRR2, GABRR3	Benzodiazepine receptor agonist
5848	-42.89	cp	BRD-K76723084	isotretinoin	Retinoid receptor agonist		CYP2B6, CYP2C19, CYP2C8, CYP3A5, CYP3A7, NR2C2, PPARD, RARA, RARB, RARG, RORB, RORC	Retinoid receptor agonist
5853	-42.97	cp	BRD-A95096829	PNU-96415E	Dopamine receptor antagonist			Dopamine receptor antagonist
5855	-42.99	cp	BRD-K19525698	ozagrel	Thromboxane synthase inhibitor		TBXAS1	Thromboxane synthase inhibitor
5858	-43.03	cp	BRD-A66563878	medetomidine	Adrenergic receptor agonist		ADRA2A, ADRA2B, ADRA2C, ADRA1A, ADRA1B, ADRA1D	Adrenergic receptor agonist
5864	-43.29	cp	BRD-A23683907	NAS-181	Serotonin receptor antagonist		HTR1B	Serotonin receptor antagonist
5870	-43.49	cp	BRD-K02953697	naringin	Cytochrome P450 inhibitor		SLCO1A2	Cytochrome P450 inhibitor
5872	-43.54	cp	BRD-K71860425	CDK2-5-inhibitor	CDK inhibitor		CDK2, CDK5	CDK inhibitor
5873	-43.55	cp	BRD-K60184833	tyrphostin-46	Tyrosine kinase inhibitor		EGFR	Tyrosine kinase inhibitor
5878	-43.66	cp	BRD-K38055836	etamivan	Respiratory stimulant			Respiratory stimulant
5883	-43.75	cp	BRD-K35941380	methysergide	Serotonin receptor antagonist		HTR2C, HTR1B, HTR1E, HTR1F, HTR2A, HTR2B, HTR7, HTR1A, HTR1D, HTR5A, HTR6	Serotonin receptor antagonist
5884	-43.82	cp	BRD-K51476772	ST-638	Tyrosine kinase inhibitor			Tyrosine kinase inhibitor
5886	-43.85	cp	BRD-K70301876	escitalopram	Selective serotonin reuptake inhibitor (SSRI)		SLC6A4, ADRA1A, CHRM1, CYP2C19, HRH1, SLC6A2, SLC6A3	Selective serotonin reuptake inhibitor (SSRI)
5889	-43.98	cp	BRD-K59256312	gabexate	Serine protease inhibitor		PRSS1, TPSAB1	Serine protease inhibitor
5891	-44.04	cp	BRD-K62310379	fluticasone	Glucocorticoid receptor agonist		NR3C1, CYP3A5, CYP3A7, NR3C2, PGR, PLA2G4A	Glucocorticoid receptor agonist
5900	-44.21	cp	BRD-K48932581	cetraxate	Mucus protecting agent		GAST	Mucus protecting agent
5901	-44.23	cp	BRD-K87919739	tyrphostin-AG-825	Receptor tyrosine protein kinase inhibitor		ERBB2	Receptor tyrosine protein kinase inhibitor
5903	-44.26	cp	BRD-K50660797	epicatechin	Bacterial DNA gyrase inhibitor		FASN, APP, BACE1, SLC5A1	Bacterial DNA gyrase inhibitor, Cyclooxygenase inhibitor, DNA polymerase inhibitor
5905	-44.28	cp	BRD-A48720949	testosterone	androgen receptor agonist		AR, CYP19A1, CYP2C19, CYP2C8, CYP3A5	androgen receptor agonist
5911	-44.5	cp	BRD-K53665955	MK-5108	Aurora kinase inhibitor		AURKA, AURKB, AURKC	Aurora kinase inhibitor
5913	-44.54	cp	BRD-K81209159	herniarin	Acetylcholinesterase inhibitor		ACHE, CA1, CA12, CA14, CA4, CA6, CA9	Acetylcholinesterase inhibitor
5914	-44.57	cp	BRD-K13800121	parecoxib	Cyclooxygenase inhibitor		LTF, PTGS2	Cyclooxygenase inhibitor
5917	-44.61	cp	BRD-A29734509	disopyramide	Sodium channel blocker		SCN5A, CHRM1, CHRM2, CHRM3, KCND2, KCND3, KCNH2	Sodium channel blocker
5919	-44.75	cp	BRD-K64746805	MBCQ	Phosphodiesterase inhibitor		PDE5A	Phosphodiesterase inhibitor
5923	-44.87	cp	BRD-A72758037	asiatic-acid	Apoptosis stimulant		PYGM	Apoptosis stimulant
5928	-44.95	cp	BRD-K88551539	CAY-10585	HIF modulator		HIF1A	HIF modulator
5937	-45.16	cp	BRD-K67174588	toremifene	Estrogen receptor antagonist		ESR1, CYP3A5	Estrogen receptor antagonist, Selective estrogen receptor modulator (SERM)
5951	-45.58	cp	BRD-K47936004	piribedil	Dopamine receptor agonist		DRD2, DRD3, ADRA1A, ADRA2A, ADRA2C, DRD4, HTR1A, HTR2B	Dopamine receptor agonist
5953	-45.59	cp	BRD-A24122750	saclofen	GABA receptor antagonist		GABBR1, GABBR2, KCTD12, KCTD16, KCTD8	GABA receptor antagonist
5955	-45.65	cp	BRD-A49046702	SKF-89976A	GABA uptake inhibitor		SLC6A1	GABA uptake inhibitor
5956	-45.65	cp	BRD-K71499074	diclofenamide	Carbonic anhydrase inhibitor		CA1, CA2, CA4, CA12, CA7	Carbonic anhydrase inhibitor
5958	-45.73	cp	BRD-K81729199	AQ-RA741	Acetylcholine receptor antagonist			Acetylcholine receptor antagonist
5968	-45.93	cp	BRD-K99946902	hexylresorcinol	Local anesthetic		TYR	Local anesthetic
5969	-45.95	cp	BRD-K26818574	BIX-01294	Histone lysine methyltransferase inhibitor		EHMT1, EHMT2	Histone lysine methyltransferase inhibitor, DNA methyltransferase inhibitor
5972	-46	cp	BRD-K67100011	pivmecillinam	Bacterial cell wall synthesis inhibitor			Bacterial cell wall synthesis inhibitor
5973	-46.02	cp	BRD-K28075147	biochanin-a	Estrogen receptor agonist			Estrogen receptor agonist
5979	-46.1	cp	BRD-A82096673	KU-C103428N	CDC inhibitor		NFE2	CDC inhibitor, Rho associated kinase inhibitor
5981	-46.15	cp	BRD-A09722536	cyclophosphamide	DNA alkylating agent		BCL2, CYP2B6, CYP2C19, CYP3A5, LGALS1	DNA alkylating agent
5985	-46.29	cp	BRD-A04327189	synephrine	Adrenergic receptor agonist		ADRA1A	Adrenergic receptor agonist
5986	-46.29	cp	BRD-A63043573	cabergoline	Dopamine receptor agonist		DRD2, ADRA1A, ADRA2A, ADRA2B, ADRA2C, DRD1, DRD3, DRD4, DRD5, HTR1A, HTR1B, HTR1D, HTR2A, HTR2B, HTR2C, ADRA1B, ADRA1D, ADRB1, ADRB2, HTR7, PRL	Dopamine receptor agonist
5990	-46.43	cp	BRD-K83144676	olmesartan	Angiotensin antagonist		AGTR1	Angiotensin antagonist
5996	-46.57	cp	BRD-A65449987	flunisolide	Cytochrome P450 inhibitor		NR3C1	Cytochrome P450 inhibitor
6000	-46.66	cp	BRD-K88789588	letrozole	Aromatase inhibitor		CYP19A1	Aromatase inhibitor
6003	-46.79	cp	BRD-A16332958	modafinil	Adrenergic receptor agonist		ADRA1B, CYP1A2, CYP2B6, CYP2C19, CYP3A4, CYP3A5, SLC6A3	Adrenergic receptor agonist
6004	-46.79	cp	BRD-K40530731	hyoscyamine	Acetylcholine receptor antagonist		CHRM1, CHRM2, CHRM3, CHRM4	Acetylcholine receptor antagonist
6005	-46.83	cp	BRD-A68281735	REV-5901	Leukotriene receptor antagonist		ALOX5	Leukotriene receptor antagonist, Lipoxygenase inhibitor
6009	-46.96	cp	BRD-K91699951	benzonatate	Local anesthetic		SCN5A	Local anesthetic
6010	-47.05	cp	BRD-K15164005	apoptosis-activator-II	Carboxylesterase inhibitor		BCHE, CES1	Carboxylesterase inhibitor
6011	-47.06	cp	BRD-A62071884	siguazodan	Phosphodiesterase inhibitor		PDE3A	Phosphodiesterase inhibitor
6015	-47.13	cp	BRD-K40742111	baeomycesic-acid	Lipoxygenase inhibitor			Lipoxygenase inhibitor
6017	-47.15	cp	BRD-K89402695	L-655240	Thromboxane receptor antagonist		PTGES	Thromboxane receptor antagonist
6018	-47.16	cp	BRD-K86191271	cytosporone-b	NUR77 receptor agonist		NR4A1	NUR77 receptor agonist
6029	-47.41	cp	BRD-K99174507	cardiogenol-c	Cardiomyogenesis inducer			Cardiomyogenesis inducer
6031	-47.44	cp	BRD-A80641450	FR-139317	Endothelin receptor antagonist		EDNRA	Endothelin receptor antagonist
6032	-47.47	cp	BRD-K29653726	topiramate	Carbonic anhydrase inhibitor		CA2, CA4, GRIK1, CA1, CA12, CA7, CYP2C19, CYP3A4, GABRA1, GABRA2, GABRA3, GABRA4, GABRA5, GABRA6, GABRB1, GABRB2, GABRB3, GABRD, GABRE, GABRG1, GABRG2, GABRG3, GABRP, GABRQ, GRIA1, SCN1A, SCN5A	Carbonic anhydrase inhibitor, Glutamate receptor antagonist, Kainate receptor antagonist
6037	-47.6	cp	BRD-K13544237	r(-)-propylnorapomorphine	Dopamine receptor agonist		DRD2, DRD1, DRD3	Dopamine receptor agonist, TRPA1 modulator
6040	-47.63	cp	BRD-A86044036	flurbiprofen	Cyclooxygenase inhibitor		PTGS1, PTGS2	Cyclooxygenase inhibitor
6041	-47.71	cp	BRD-K93658967	aloisine	CDK inhibitor		CDK2, CDK5, CDK1, CDK5R1, CFTR, PTK2B, ZAP70	CDK inhibitor, CFTR channel agonist, Glycogen synthase kinase inhibitor
6042	-47.73	cp	BRD-K59637651	NSC-119889	Protein synthesis inhibitor			Protein synthesis inhibitor
6044	-47.77	cp	BRD-K41170226	deoxycholic-acid	G protein-coupled receptor agonist		GPBAR1, EFTUD1, FPR1	G protein-coupled receptor agonist, Biliverdin reductase A activator, Unidentified pharmacological activity
6045	-47.79	cp	BRD-K44067360	flufenamic-acid	Chloride channel blocker		AKR1C3, AR, PTGS1, PTGS2, ANO1, GJA1, GJA10, GJA3, GJA4, GJA5, GJA8, GJA9, GJB1, GJB2, GJB3, GJB4, GJB5, GJB6, GJB7, GJC1, GJC2, GJC3, GJD2, GJD3, GJD4, GJE1, PANX1, PANX2, PANX3, PKD2L1, TRPC5, TRPM2, TRPM5	Chloride channel blocker
6047	-47.79	cp	BRD-K36740062	GSK-1070916	Aurora kinase inhibitor		AURKB, AURKC, AURKA, CYP2D6, CYP3A4	Aurora kinase inhibitor
6049	-47.83	cp	BRD-K54142781	cirazoline	Adrenergic receptor agonist		ADRA1A	Adrenergic receptor agonist
6050	-47.84	cp	BRD-K71512533	SNS-314	Aurora kinase inhibitor		AURKA, AURKB, AURKC	Aurora kinase inhibitor
6051	-47.93	cp	BRD-K70976396	cefoxitin	Bacterial cell wall synthesis inhibitor			Bacterial cell wall synthesis inhibitor
6054	-47.97	cp	BRD-A35338386	NECA	Adenosine receptor agonist		ADORA1, ADORA2A, ADORA2B, ADORA3, HSP90B1	Adenosine receptor agonist
6058	-48.04	cp	BRD-K18742343	H-8	PKA inhibitor		PKIA, PRKACA	PKA inhibitor
6064	-48.11	cp	BRD-A87125127	3-matida	Glutamate receptor antagonist		GRM1	Glutamate receptor antagonist
6067	-48.15	cp	BRD-K43290182	Ro-04-6790	Serotonin receptor antagonist		HTR6	Serotonin receptor antagonist
6073	-48.34	cp	BRD-A95513702	androsta-1,4-dien-3,17-dione	Aromatase inhibitor		CYP19A1	Aromatase inhibitor
6077	-48.53	cp	BRD-K40992116	parachlorophenol	Anti-infective			Anti-infective
6080	-48.58	cp	BRD-K43880410	pregnenolone	glutamate receptor modulator		CYP17A1, PGR, SULT2B1	glutamate receptor modulator
6082	-48.6	cp	BRD-K46678324	RHO-kinase-inhibitor-II	Rho associated kinase inhibitor			Rho associated kinase inhibitor
6083	-48.64	cp	BRD-K59331372	SB-366791	TRPV antagonist		TRPV1	TRPV antagonist
6084	-48.66	cp	BRD-K08924299	palonosetron	Serotonin receptor antagonist		HTR3A	Serotonin receptor antagonist
6088	-48.73	cp	BRD-K18905250	ST-91	Adrenergic receptor agonist			Adrenergic receptor agonist
6089	-48.75	cp	BRD-M40783228	mesna	Antioxidant			Antioxidant
6094	-48.9	cp	BRD-A36471396	biperiden	Acetylcholine receptor antagonist		CHRM1, CHRM2, CHRM3, CHRM4, CHRM5, CHRNA2	Acetylcholine receptor antagonist
6097	-49.05	cp	BRD-K62858456	lomerizine	Calcium channel blocker		ABCB1, CACNA1B, SCN5A	Calcium channel blocker
6103	-49.14	cp	BRD-K89152108	liothyronine	Thyroid hormone stimulant		THRA, THRB	Thyroid hormone stimulant
6109	-49.33	cp	BRD-K82381502	acetylcholine	Acetylcholine receptor agonist		ACHE, CHRM1, CHRM2, CHRM3, CHRM4, CHRM5, CHRNA2	Acetylcholine receptor agonist
6110	-49.36	cp	BRD-K43797669	genistein	Tyrosine kinase inhibitor		CFTR, ESR2, EGFR, ESR1, ESRRA, ESRRB, ESRRG, NCOA1, NCOA2, PPARG, PTK2B, TOP2A, TRPC5	Tyrosine kinase inhibitor
6114	-49.5	cp	BRD-K34437622	BRD-K34437622	Thymidylate synthase inhibitor		TYMS	Thymidylate synthase inhibitor
6120	-49.61	cp	BRD-K76872913	benzanthrone	Aromatic hydrocarbon derivative			Aromatic hydrocarbon derivative
6122	-49.63	cp	BRD-K92446736	zatebradine	HCN channel blocker		HCN1, HCN2, HCN3, HCN4	HCN channel blocker
6124	-49.69	cp	BRD-K74212935	ergocryptine	Dopamine agonist			Dopamine agonist
6125	-49.73	cp	BRD-K42573370	avrainvillamide-analog-2	nucleophosmin inhibitor		NPM1	nucleophosmin inhibitor
6130	-49.87	cp	BRD-K56403959	ZK-756326	CC chemokine receptor ligand		CCR8	CC chemokine receptor ligand
6133	-49.92	cp	BRD-K54771420	glycocholic-acid	Cholesterol inhibitor		FABP6	Cholesterol inhibitor
6134	-49.93	cp	BRD-K28849549	mesalazine	Cyclooxygenase inhibitor		PTGS1, PPARG, PTGS2, ALOX5, CHUK, CTNNB1, IKBKB, MPO, NAT1	Cyclooxygenase inhibitor, Lipoxygenase inhibitor, Prostanoid receptor antagonist
6135	-49.95	cp	BRD-K97399794	quercetin	Polar auxin transport inhibitor		PIK3CG, AKR1B1, ATP5A1, ATP5B, ATP5C1, CYP2C8, EGFR, GAA, HCK, HIBCH, MAOA, PIM1, PTPN1, SCN5A, SIRT1, STK17B, UGT3A1, XDH	Polar auxin transport inhibitor
6140	-49.99	cp	BRD-A96799240	4-hydroxyretinoic-acid	Retinoid receptor binder			Retinoid receptor binder
6142	-50.02	cp	BRD-K49448285	bisindolylmaleimide	CDK inhibitor		CCND1, CDK4, LRRK2, PDPK1, PIM1, PRKCA, PRKCB, PRKCI, PRKCZ	CDK inhibitor
6144	-50.05	cp	BRD-A39255369	DCPIB	Chloride channel blocker		SLC1A2	Chloride channel blocker, Gap junction modulator, Glutamate inhibitor
6152	-50.12	cp	BRD-A74980173	gatifloxacin	Bacterial DNA gyrase inhibitor			Bacterial DNA gyrase inhibitor
6153	-50.13	cp	BRD-A01317026	7,8-dihydro-L-biopterin	Dihydroneopterin aldolase inhibitor		NOS2, TPH1	Dihydroneopterin aldolase inhibitor
6161	-50.31	cp	BRD-K50324045	avrainvillamide-analog-6	nucleophosmin inhibitor		NPM1	nucleophosmin inhibitor
6172	-50.57	cp	BRD-K68264559	brimonidine	Adrenergic receptor agonist		ADRA2A, ADRA2B, ADRA2C, AOX1	Adrenergic receptor agonist
6180	-50.78	cp	BRD-A03216249	mepivacaine	Potassium channel blocker		SCN10A, SCN9A	Potassium channel blocker, Sodium channel blocker
6181	-50.78	cp	BRD-K04430056	7-nitroindazole	nitric oxide synthase inhibitor		NOS1, NOS2, NOS3	nitric oxide synthase inhibitor
6182	-50.8	cp	BRD-K01192156	tyrphostin-AG-112	Protein tyrosine kinase inhibitor		EGFR	Protein tyrosine kinase inhibitor
6185	-50.87	cp	BRD-A14966924	alaproclate	Serotonin receptor antagonist		SLC6A4	Serotonin receptor antagonist
6195	-51.15	cp	BRD-A87719232	naproxen	Cyclooxygenase inhibitor		PTGS2, PTGS1	Cyclooxygenase inhibitor
6206	-51.38	cp	BRD-A99177642	deltaline	Acetylcholine receptor antagonist		CHRNA7	Acetylcholine receptor antagonist
6207	-51.4	cp	BRD-A75455249	kavain	Calcium channel modulator		MTOR	Calcium channel modulator, Sodium channel blocker
6208	-51.4	cp	BRD-A99571536	dubinidine	Anti-epileptic			Anti-epileptic
6210	-51.44	cp	BRD-K38903228	hesperidin	Flavanone glycoside		CACNA1B	Flavanone glycoside
6212	-51.48	cp	BRD-A77118605	BML-ST330	Phospholipase inhibitor			Phospholipase inhibitor
6213	-51.49	cp	BRD-K32164935	tolazamide	ATP channel blocker		KCNJ1, KCNJ10	ATP channel blocker
6214	-51.59	cp	BRD-A63836183	PD-123319	Angiotensin receptor antagonist		AGTR2	Angiotensin receptor antagonist
6219	-51.68	cp	BRD-K10016611	pyridine-2-aldoxime	Acetylcholinesterase inhibitor		ACHE, BCHE	Acetylcholinesterase inhibitor
6220	-51.72	cp	BRD-K72222507	quinapril	ACE inhibitor		ACE	ACE inhibitor
6223	-51.75	cp	BRD-K65639003	icariin	Phosphodiesterase inhibitor		NMUR2, PDE5A, SORD	Phosphodiesterase inhibitor
6224	-51.77	cp	BRD-K41564320	purvalanol-b	Tyrosine kinase inhibitor		CDK2, CDK4, MAPK1, MAPK3, CDK5, SRPK2	Tyrosine kinase inhibitor
6228	-52	cp	BRD-K28346421	rifapentine	RNA polymerase inhibitor		CYP2C8, CYP3A4	RNA polymerase inhibitor
6232	-52.05	cp	BRD-A84327315	calcitriol	Vitamin D receptor agonist		VDR, CYP3A5	Vitamin D receptor agonist
6235	-52.15	cp	BRD-K31843556	T-0070907	PPAR receptor antagonist		PPARG	PPAR receptor antagonist
6237	-52.24	cp	BRD-A37052580	physostigmine	Acetylcholinesterase inhibitor		ACHE, BCHE	Acetylcholinesterase inhibitor, Cholinesterase inhibitor
6240	-52.38	cp	BRD-K24526313	levcromakalim	Potassium channel activator		KCNJ8, ABCC9, KCNJ5	Potassium channel activator
6241	-52.4	cp	BRD-A90515964	guaifenesin	Expectorant			Expectorant
6242	-52.45	cp	BRD-A15131297	benazepril	ACE inhibitor		ACE	ACE inhibitor
6245	-52.55	cp	BRD-K90027355	spironolactone	Mineralocorticoid receptor antagonist		NR3C2, AR, CACNA1A, CACNA1B, CACNA1C, CACNA1D, CACNA1F, CACNA1G, CACNA1H, CACNA1I, CACNA1S, CACNA2D1, CACNA2D2, CACNA2D3, CACNB1, CACNB2, CACNB3, CACNB4, CACNG1, CYP11B2, KCNA5, KCND3, NR3C1, PGR, SCNN1A, SHBG	Mineralocorticoid receptor antagonist
6247	-52.64	cp	BRD-K42500029	CGP-57380	MAP kinase inhibitor		AURKB, LCK, MKNK1, MKNK2, SGK1	MAP kinase inhibitor
6249	-52.7	cp	BRD-K82865713	prostaglandin-b2	cAMP inhibitor			cAMP inhibitor
6250	-52.73	cp	BRD-K52459643	prostaglandin-e1	Prostanoid receptor agonist		PTGER1, PTGER2, CATSPER1, CATSPER2, CATSPER3, CATSPER4, PTGDR, PTGER4, PTGIR	Prostanoid receptor agonist
6251	-52.75	cp	BRD-K39733634	L-161982	Prostanoid receptor antagonist		PTGER4	Prostanoid receptor antagonist, Angiotensin receptor antagonist
6252	-52.78	cp	BRD-A25775766	securinine	GABA receptor antagonist		GABRA1	GABA receptor antagonist, TP53 activator
6255	-52.82	cp	BRD-K61993165	niacin	NAD precursor with lipid lowering effects		HCAR2, HCAR3, ACHE, DGAT2, HCAR1, NNMT, PTGDR, QPRT	NAD precursor with lipid lowering effects, Vitamin B
6258	-52.86	cp	BRD-A13133631	fluorometholone	Glucocorticoid receptor agonist		NR3C1	Glucocorticoid receptor agonist
6263	-52.97	cp	BRD-A91866971	SQ-29548	Thromboxane receptor antagonist			Thromboxane receptor antagonist
6267	-53.08	cp	BRD-K97061094	azacyclonol	Histamine receptor antagonist		HRH1	Histamine receptor antagonist
6269	-53.26	cp	BRD-K60174629	z-prolyl-prolinal	Prolyl endopeptidase inhibitor		PREP	Prolyl endopeptidase inhibitor
6273	-53.37	cp	BRD-K27141178	SB-203186	Serotonin receptor antagonist		HTR4	Serotonin receptor antagonist
6274	-53.41	cp	BRD-A92161634	scopoline	Acetylcholine receptor antagonist			Acetylcholine receptor antagonist
6275	-53.44	cp	BRD-K04046242	equilin	Estrogen receptor agonist		HSD17B1	Estrogen receptor agonist
6277	-53.49	cp	BRD-K87048468	RS-102221	Serotonin receptor antagonist		HTR2C, HTR2A, HTR2B	Serotonin receptor antagonist
6278	-53.53	cp	BRD-K83010055	VU-0415374-1	Glutamate receptor modulator		GRM4	Glutamate receptor modulator
6279	-53.56	cp	BRD-K73999723	telmisartan	Angiotensin receptor antagonist		AGTR1, PPARG, CYP2C19, CYP2J2, PPARA	Angiotensin receptor antagonist
6281	-53.58	cp	BRD-A29644307	nomifensine	Dopamine uptake inhibitor		SLC6A2, SLC6A3, DRD2, MAOA, MAOB, MPO	Dopamine uptake inhibitor, Noradrenaline uptake inhibitor
6284	-53.62	cp	BRD-K84663978	trequinsin	Phosphodiesterase inhibitor		PDE4A, PDE4B, PDE4C, PDE4D, PDE5A, PTGIR	Phosphodiesterase inhibitor
6286	-53.73	cp	BRD-K81062487	taurocholic-acid	Bile acid		CEL, FXR, NR1H4, FABP6, SLCO1C1	Bile acid
6289	-53.75	cp	BRD-A75368507	demeclocycline	Bacterial 30S ribosomal subunit inhibitor			Bacterial 30S ribosomal subunit inhibitor
6304	-54.28	cp	BRD-K19111024	clofibric-acid	PPAR receptor agonist		PPARA	PPAR receptor agonist
6308	-54.39	cp	BRD-A16478930	amcinonide	Glucocorticoid receptor agonist		NR3C1, ANXA1	Glucocorticoid receptor agonist
6310	-54.43	cp	BRD-K81521265	dicyclohexylurea	Epoxide hydolase inhibitor		EPHX2	Epoxide hydolase inhibitor
6311	-54.45	cp	BRD-K49519144	LY-2140023	Glutamate receptor agonist		GRM3, GRM2	Glutamate receptor agonist
6318	-54.61	cp	BRD-K98157055	SIB-1757	Glutamate receptor antagonist		GRM5	Glutamate receptor antagonist
6319	-54.65	cp	BRD-K91733562	secoisolariciresinol	Antioxidant			Antioxidant
6324	-54.79	cp	BRD-K10670311	sulfasalazine	Antirheumatic		PTGS1, PTGS2, ACAT1, ALOX5, CHUK, IKBKB, PLA2G1B, PPARG, SLC46A1, SLC7A11, TBXAS1	Antirheumatic, NFkB pathway inhibitor
6326	-54.8	cp	BRD-K09537769	NU-7026	DNA dependent protein kinase inhibitor		PRKDC	DNA dependent protein kinase inhibitor, MTOR inhibitor, PI3K inhibitor
6330	-54.92	cp	BRD-A25143711	hydrocortisone	Glucocorticoid receptor agonist		ANXA1, NOS2, NR3C1, NR3C2	Glucocorticoid receptor agonist
6331	-54.98	cp	BRD-A15297126	fluocinonide	Glucocorticoid receptor agonist		NR3C1, SERPINA6, SMO	Glucocorticoid receptor agonist
6337	-55.22	cp	BRD-K59522102	piperine	Monoamine oxidase inhibitor		MAOA, MAOB, TRPV1	Monoamine oxidase inhibitor
6340	-55.27	cp	BRD-K04466929	Merck60	HDAC inhibitor		HDAC1, HDAC2	HDAC inhibitor
6343	-55.35	cp	BRD-A17448384	beclometasone	Glucocorticoid receptor agonist		NR3C1, CYP3A5, GPR97, SERPINA6	Glucocorticoid receptor agonist
6346	-55.43	cp	BRD-A16444946	acarbose	Glucosidase inhibitor		GAA, MGAM, AMY2A, SI	Glucosidase inhibitor
6347	-55.43	cp	BRD-K96720755	relcovaptan	Vasopressin receptor antagonist		AVPR1A, AVPR1B, AVPR2, OXTR	Vasopressin receptor antagonist
6350	-55.55	cp	BRD-U86922168	QL-XII-47	BTK inhibitor		BMX, BTK	BTK inhibitor, Cytoplasmic tyrosine protein kinase BMX inhibitor
6351	-55.59	cp	BRD-K36153907	KU-C103885	Cystic fibrosis transmembrane conductance regulator inhibitor			Cystic fibrosis transmembrane conductance regulator inhibitor
6353	-55.6	cp	BRD-K56596464	QX-314	Sodium channel blocker		MAPK14, TGFBR1	Sodium channel blocker
6354	-55.65	cp	BRD-K13514097	everolimus	MTOR inhibitor		MTOR, CYP3A5, FKBP1A	MTOR inhibitor
6356	-55.72	cp	BRD-K29178788	dictamnine	Furoquinoline alkaloid			Furoquinoline alkaloid
6359	-55.8	cp	BRD-K78278890	NM-PP1	Mutant kinase inhibitor		CAMK2A, LCK, MAPK8, PRKACA, RIPK2, SRC	Mutant kinase inhibitor
6360	-55.85	cp	BRD-A54236247	racephedrine	Adrenergic receptor agonist			Adrenergic receptor agonist
6362	-55.92	cp	BRD-K83023055	GR-135531	Melatonin receptor agonist			Melatonin receptor agonist
6370	-56.1	cp	BRD-A00758722	noretynodrel	Progestogen hormone		PGR	Progestogen hormone
6372	-56.12	cp	BRD-K62206109	VUF-5681	Histamine receptor antagonist		HRH3	Histamine receptor antagonist
6378	-56.33	cp	BRD-A79672927	tropicamide	Acetylcholine receptor antagonist		CHRM3, CHRM4, CHRM1, CHRM2	Acetylcholine receptor antagonist
6381	-56.39	cp	BRD-K36529613	PU-H71	HSP inhibitor		HSP90AA1	HSP inhibitor
6387	-56.46	cp	BRD-K85606544	neratinib	EGFR inhibitor		EGFR, ERBB2, ERBB4, KDR	EGFR inhibitor
6388	-56.5	cp	BRD-K52911425	GDC-0941	PI3K inhibitor		PIK3CG, PIK3CA, PIK3CB, PIK3CD	PI3K inhibitor
6390	-56.63	cp	BRD-K04853698	LDN-193189	Serine/threonine kinase inhibitor		ACVR1, BMPR1A	Serine/threonine kinase inhibitor
6392	-56.66	cp	BRD-K00206590	P-1075	ATP channel activator		KCNJ8	ATP channel activator, Potassium channel activator
6393	-56.68	cp	BRD-K06014311	DH-97	Melatonin receptor antagonist		MTNR1B	Melatonin receptor antagonist
6397	-56.79	cp	BRD-A20589515	dihydroxyphenylglycine	Glutamate receptor agonist		GRM1	Glutamate receptor agonist
6408	-57.04	cp	BRD-K84085265	CG-930	JNK inhibitor		MAPK8	JNK inhibitor
6410	-57.07	cp	BRD-K33204703	AG-370	PDGFR receptor inhibitor		PDGFRB	PDGFR receptor inhibitor
6418	-57.26	cp	BRD-K07996107	harpagoside	Acetylcholinesterase inhibitor		ACHE	Acetylcholinesterase inhibitor
6421	-57.32	cp	BRD-K61192372	capecitabine	DNA synthesis inhibitor		TYMS, DPYD	DNA synthesis inhibitor, Thymidylate synthase inhibitor
6422	-57.33	cp	BRD-A78322124	dobutamine	Adrenergic receptor agonist		ADRB1, ADRB2, ADRA1A	Adrenergic receptor agonist
6430	-57.5	cp	BRD-K53857191	risperidone	Dopamine receptor antagonist		DRD2, HTR2A, ADRA1A, ADRA1B, DRD3, HRH1, HTR1A, HTR1D, HTR2C, ADRA1D, ADRA2A, ADRA2B, ADRA2C, CYP3A5, DRD1, DRD4, HTR1B, HTR1E, HTR1F, HTR6, HTR7	Dopamine receptor antagonist, Serotonin receptor antagonist
6441	-57.71	cp	BRD-K26134695	calpeptin	Calpain inhibitor			Calpain inhibitor
6442	-57.72	cp	BRD-K30189597	SYK-inhibitor	SYK inhibitor		SYK	SYK inhibitor
6444	-57.77	cp	BRD-A31227688	kynuramine	Aryl hydrocarbon receptor activator			Aryl hydrocarbon receptor activator
6446	-57.83	cp	BRD-K77695569	tiabendazole	Angiogenesis inhibitor			Angiogenesis inhibitor
6448	-57.9	cp	BRD-K70330367	amantadine	Glutamate receptor antagonist		DRD2, GRIN1, GRIN2A, GRIN2B, GRIN2C, GRIN2D, GRIN3A	Glutamate receptor antagonist
6450	-57.96	cp	BRD-K18523449	mestanolone	Androgenic steroid			Androgenic steroid
6457	-58.23	cp	BRD-A62057054	MDL-11939	Serotonin receptor antagonist		HTR2A, HTR2B, HTR2C	Serotonin receptor antagonist
6466	-58.42	cp	BRD-A05352148	ipratropium	Acetylcholine receptor antagonist		CHRM1, CHRM2, CHRM3, CHRM4, CHRM5	Acetylcholine receptor antagonist
6468	-58.46	cp	BRD-K13927029	retinol	Retinoid receptor ligand		ALDH1A1, ALDH1A2, ALDH1A3, DHRS3, DHRS4, LRAT, NR2C2, RBP1, RBP3, RDH11, RDH12, RDH13, RDH14, RDH5, RDH8, RETSAT, RHO, RLBP1, RXRA, RXRB, RXRG	Retinoid receptor ligand
6472	-58.52	cp	BRD-A98702003	carbenoxolone	11-beta-HSD1 inhibitor		HSD11B1, GJA1, GJA10, GJA3, GJA4, GJA5, GJA8, GJA9, GJB1, GJB2, GJB3, GJB4, GJB5, GJB6, GJB7, GJC1, GJC2, GJC3, GJD2, GJD3, GJD4, GJE1, PANX1, PANX2, PANX3	11-beta-HSD1 inhibitor
6480	-58.81	cp	BRD-K95402279	geranylgeraniol	Farnesyltransferase inhibitor			Farnesyltransferase inhibitor
6487	-58.97	cp	BRD-A06352508	SB-218078	CHK inhibitor		CHEK1	CHK inhibitor
6491	-59.13	cp	BRD-K66019333	oxantel	Anthelmintic			Anthelmintic
6493	-59.18	cp	BRD-K26548821	quinpirole	Dopamine receptor agonist		DRD2, DRD3, DRD4, DRD1, HTR1A, HTR2A, HTR2B, HTR2C	Dopamine receptor agonist
6503	-59.55	cp	BRD-K52751261	TAK-715	p38 MAPK inhibitor		MAPK14, TNF	p38 MAPK inhibitor
6505	-59.61	cp	BRD-A10969569	ambelline	Plant alkaloid			Plant alkaloid
6509	-59.72	cp	BRD-K09397065	SR-57227A	Serotonin receptor agonist		HTR3A	Serotonin receptor agonist
6512	-59.76	cp	BRD-K59650319	YM-298198	Glutamate receptor antagonist		GRM1	Glutamate receptor antagonist
6514	-59.81	cp	BRD-A85472596	L-670596	Prostanoid receptor antagonist			Prostanoid receptor antagonist
6516	-59.89	cp	BRD-A65013509	oxybutynin	Acetylcholine receptor antagonist		CHRM3, CHRM1, CHRM2, CHRM4	Acetylcholine receptor antagonist
6523	-60.05	cp	BRD-K30480208	torasemide	Electrolyte reabsorption inhibitor		SLC12A1, CYP2C8, SLC12A2	Electrolyte reabsorption inhibitor, Thromboxane receptor antagonist
6525	-60.06	cp	BRD-A24543851	nornicotine	Acetylcholine receptor agonist			Acetylcholine receptor agonist
6529	-60.1	cp	BRD-K09485525	GANT-61	GLI antagonist		DHH, IHH	GLI antagonist
6530	-60.13	cp	BRD-A24514565	warfarin	Vitamin K antagonist		VKORC1, CYP2C19, CYP2C8, CYP4F2	Vitamin K antagonist
6531	-60.14	cp	BRD-A07824748	flavanone	11-beta-HSD1 inhibitor		ADORA3, HSD11B1	11-beta-HSD1 inhibitor
6537	-60.4	cp	BRD-A41450521	tosufloxacin	Bacterial DNA gyrase inhibitor			Bacterial DNA gyrase inhibitor
6546	-60.6	cp	BRD-A66927094	nemonapride	Dopamine receptor antagonist		DRD2, DRD3, DRD4	Dopamine receptor antagonist
6547	-60.65	cp	BRD-K96740444	itopride	Dopamine receptor antagonist		DRD2, ACHE, CHRM3	Dopamine receptor antagonist
6548	-60.72	cp	BRD-K70883034	nimetazepam	GABA receptor agonist		GABRA1, GABRA2, GABRA3, GABRA5	GABA receptor agonist
6551	-60.8	cp	BRD-A20697603	thiostrepton	FOXM1 inhibitor		FOXM1	FOXM1 inhibitor, Protein synthesis inhibitor
6557	-60.89	cp	BRD-A33168282	sotalol	Adrenergic receptor antagonist		ADRB1, ADRB2, KCNH2	Adrenergic receptor antagonist
6564	-60.98	cp	BRD-K46018455	bezafibrate	PPAR receptor agonist		PPARA, PPARD, PPARG, HSD11B1, LPL	PPAR receptor agonist
6567	-61.1	cp	BRD-A09161221	nomilin	HSP inhibitor			HSP inhibitor
6569	-61.14	cp	BRD-K55930204	phenytoin	Hydantoin antiepileptic		ABCB1, CYP2B6, CYP2C19, CYP3A4, SCN1A, SCN2A, SCN5A	Hydantoin antiepileptic
6576	-61.25	cp	BRD-K06878038	deferiprone	Chelating agent		CYP4F2	Chelating agent
6579	-61.32	cp	BRD-K76304753	phenazopyridine	Local anesthetic		SCN1A	Local anesthetic
6583	-61.47	cp	BRD-K26997899	SA-792574	Microtubule inhibitor		TUBB	Microtubule inhibitor
6590	-61.73	cp	BRD-A44448661	pentobarbital	Barbiturate antiepileptic		GABRA1, CHRNA4, CHRNA7, GABRA2, GABRA3, GABRA4, GABRA5, GABRA6, GABRB1, GABRB2, GABRB3, GABRD, GABRE, GABRG1, GABRG2, GABRG3, GABRP, GABRQ, GRIA2, GRIK2, GRIN1, GRIN2A, GRIN2B, GRIN2C, GRIN2D, GRIN3A, GRIN3B	Barbiturate antiepileptic, GABA receptor modulator
6593	-61.82	cp	BRD-K26657438	imiquimod	TLR agonist		TLR7, TLR8	TLR agonist, Interferon inducer
6594	-61.84	cp	BRD-K20152659	gamma-homolinolenic-acid	Cholesterol inhibitor		PTGS1, PTGS2	Cholesterol inhibitor, Platelet aggregation inhibitor, Prostanoid receptor agonist, Prostanoid receptor stimulant
6597	-61.9	cp	BRD-K39983086	loteprednol	Glucocorticoid receptor agonist		NR3C1	Glucocorticoid receptor agonist, Phospholipase inhibitor
6603	-62.14	cp	BRD-K69600043	thiethylperazine	Dopamine receptor antagonist		DRD1, DRD2, DRD4	Dopamine receptor antagonist
6604	-62.18	cp	BRD-K32610195	androstenedione	Cytochrome P450 inhibitor		AKR1C3, HSD17B1, HSD3B1	Cytochrome P450 inhibitor
6606	-62.28	cp	BRD-A99833829	bethanechol	Acetylcholine receptor agonist		CHRM2, CHRM1, CHRM3, CHRM4	Acetylcholine receptor agonist
6611	-62.38	cp	BRD-K15592317	CP466722	ATM kinase inhibitor		ATM	ATM kinase inhibitor
6612	-62.42	cp	BRD-K66412701	pazufloxacin	Topoisomerase inhibitor			Topoisomerase inhibitor
6613	-62.47	cp	BRD-K85402309	dovitinib	EGFR inhibitor		EGFR, FGFR3, PDGFRB, CSF1R, FGFR1, FGFR2, FLT1, FLT3, FLT4, INSR, KDR, KIT, PDGFRA	EGFR inhibitor, FLT3 inhibitor, FGFR inhibitor, PDGFR receptor inhibitor, VEGFR inhibitor
6615	-62.54	cp	BRD-A84702196	penicillin	Bacterial cell wall synthesis inhibitor			Bacterial cell wall synthesis inhibitor
6617	-62.57	cp	BRD-K50128260	sildenafil	Phosphodiesterase inhibitor		PDE5A, PDE6G, PDE6H, SLCO1B1, SLCO1B3	Phosphodiesterase inhibitor
6618	-62.58	cp	BRD-K41051431	mecillinam	Bacterial cell wall synthesis inhibitor			Bacterial cell wall synthesis inhibitor
6619	-62.6	cp	BRD-K24132293	piperlongumine	Glutathione transferase inhibitor			Glutathione transferase inhibitor
6621	-62.64	cp	BRD-K63641886	cefuroxime	Bacterial cell wall synthesis inhibitor			Bacterial cell wall synthesis inhibitor
6622	-62.65	cp	BRD-A22844106	tenoxicam	Cyclooxygenase inhibitor		PTGS2, PTGS1	Cyclooxygenase inhibitor
6624	-62.67	cp	BRD-A72711497	lasalocid	Bacterial permeability inducer			Bacterial permeability inducer
6629	-62.91	cp	BRD-K80396088	gliquidone	Sulfonylurea		ABCC8, KCNJ10, KCNJ11, KCNJ8	Sulfonylurea
6639	-63.14	cp	BRD-K61177364	NBI-27914	CRF receptor antagonist		CRHR1	CRF receptor antagonist
6640	-63.15	cp	BRD-A88282067	delcorine	Antiarrhythmic			Antiarrhythmic, Ganglionic blocker
6644	-63.25	cp	BRD-K88611939	aniracetam	Glutamate receptor agonist		DRD2, GRIA1, GRIA2, GRIA3, HTR2A, GRIA4	Glutamate receptor agonist
6645	-63.25	cp	BRD-K53220666	trimetozine	Sedative			Sedative
6646	-63.28	cp	BRD-K62012036	acitretin	Retinoid receptor agonist		RARA, RARB, RARG, RBP1, RXRA, RXRB, RXRG, STAT3	Retinoid receptor agonist
6648	-63.3	cp	BRD-K97056771	HY-11007	BCR-ABL kinase inhibitor		ABL1, BCR	BCR-ABL kinase inhibitor
6652	-63.39	cp	BRD-K62792802	LY-83583	Guanylyl cyclase inhibitor		GUCY1A2	Guanylyl cyclase inhibitor
6656	-63.48	cp	BRD-K34776109	glimepiride	Insulin secretagogue		ABCC8, KCNJ11, KCNJ1	Insulin secretagogue
6659	-63.58	cp	BRD-K69328504	L-690488	Inositol monophosphatase inhibitor		IMPA1	Inositol monophosphatase inhibitor
6668	-63.85	cp	BRD-K33453211	levocabastine	Histamine receptor antagonist		HRH1, NTSR2	Histamine receptor antagonist
6669	-63.94	cp	BRD-K13032584	procarbazine	Monoamine oxidase inhibitor			Monoamine oxidase inhibitor
6673	-64.09	cp	BRD-K28428262	brivanib	FGFR inhibitor		FGFR1, KDR, FLT1, CYP3A4, FGFR2, FGFR3, FLT4, KCNH2	FGFR inhibitor, VEGFR inhibitor
6676	-64.2	cp	BRD-A27887842	prednisolone	Glucocorticoid receptor agonist		NR3C1, NR3C2, SERPINA6	Glucocorticoid receptor agonist
6677	-64.2	cp	BRD-A42571354	cetirizine	Histamine receptor antagonist		HRH1	Histamine receptor antagonist
6680	-64.22	cp	BRD-K63430059	methoxsalen	DNA synthesis inhibitor		ACHE, CYP1A2	DNA synthesis inhibitor
6681	-64.25	cp	BRD-K51816706	oxindole-I	VEGFR inhibitor		AKT1, KDR, PDPK1, RET	VEGFR inhibitor
6682	-64.3	cp	BRD-K77625572	etomoxir	Carnitine palmitoyltransferase inhibitor		CPT1A, CPT1B	Carnitine palmitoyltransferase inhibitor
6686	-64.39	cp	BRD-K09499853	KU-0060648	DNA dependent protein kinase inhibitor		PIK3CA, PIK3CB, PIK3CD, PIK3CG, PRKDC	DNA dependent protein kinase inhibitor, PI3K inhibitor
6687	-64.42	cp	BRD-K26573499	DMAB-anabaseine	Adrenergic receptor agonist		CHRNA7	Adrenergic receptor agonist
6689	-64.47	cp	BRD-K50398167	meclofenamic-acid	Cyclooxygenase inhibitor		PTGS1, PTGS2, ALOX5, CNR1, KCNQ2, KCNQ3	Cyclooxygenase inhibitor, Prostanoid receptor antagonist
6692	-64.55	cp	BRD-K95309561	dienestrol	Estrogen receptor agonist		ESR1	Estrogen receptor agonist
6693	-64.55	cp	BRD-A89175223	bisoprolol	Adrenergic receptor antagonist		ADRB1, ADRB2	Adrenergic receptor antagonist
6709	-64.99	cp	BRD-A98299281	velnacrine	cholinesterase inhibitor		ACHE	cholinesterase inhibitor
6711	-65.02	cp	BRD-K11717138	benzbromarone	Chloride channel blocker		ABCC1, SLC22A12	Chloride channel blocker
6715	-65.11	cp	BRD-K53790871	triamcinolone	Glucocorticoid receptor agonist		NR3C1, CYP3A5, CYP3A7, SERPINA6	Glucocorticoid receptor agonist, Corticosteroid agonist, Immunosuppressant
6718	-65.14	cp	BRD-K19136521	indirubin	CDK inhibitor		CDK1, CDK5, CCNE1, CDK2, CDK4, CDK5R1, CDK9, GSK3A, GSK3B, LCK, LRRK1, LRRK2	CDK inhibitor
6720	-65.19	cp	BRD-K51066026	aminoindazole	Ionophore			Ionophore
6722	-65.21	cp	BRD-K81376179	TCS-359	FLT3 inhibitor		FLT3	FLT3 inhibitor
6724	-65.22	cp	BRD-A61392169	eliprodil	Glutamate receptor antagonist		GRIN1, GRIN2B	Glutamate receptor antagonist
6725	-65.23	cp	BRD-A76279427	myriocin	Serine palmitoyltransferase inhibitor		AKT1, SPTLC1, SPTLC2, SPTLC3	Serine palmitoyltransferase inhibitor
6726	-65.28	cp	BRD-K39339537	epirizole	Cyclooxygenase inhibitor		PTGS1, PTGS2	Cyclooxygenase inhibitor
6727	-65.29	cp	BRD-A00520476	otenzepad	Acetylcholine receptor antagonist			Acetylcholine receptor antagonist
6735	-65.65	cp	BRD-K80348542	cephaeline	Protein synthesis inhibitor		RPS2	Protein synthesis inhibitor
6741	-65.75	cp	BRD-K49519092	immethridine	Histamine receptor agonist		HRH3	Histamine receptor agonist
6745	-65.8	cp	BRD-K15601958	SEW-2871	Lysophospholipid receptor agonist		S1PR1	Lysophospholipid receptor agonist
6750	-65.9	cp	BRD-K21520694	sulfacetamide	PABA antagonist			PABA antagonist
6753	-65.93	cp	BRD-K93618743	ipriflavone	Bone resorption inhibitor			Bone resorption inhibitor
6754	-65.94	cp	BRD-K67261995	adipiodone	Contrast agent		ALB	Contrast agent
6762	-66.22	cp	BRD-K32830106	guanfacine	Adrenergic receptor agonist		ADRA2A, ADRA2B, ADRA2C, CYP3A5, HCN1, HCN2, HCN3, HCN4	Adrenergic receptor agonist
6764	-66.23	cp	BRD-A89434049	sarmentogenin	ATPase inhibitor		ATP1A1	ATPase inhibitor
6765	-66.26	cp	BRD-A74904029	EI-231	Casein kinase inhibitor		CSNK2A1, CSNK2A2, CSNK2B	Casein kinase inhibitor
6767	-66.3	cp	BRD-A13084692	troglitazone	Insulin sensitizer		PPARG, ACSL4, AKR1B1, CCL2, CYP3A4, ESRRA, ESRRG, INS, SERPINE1, SLC29A1, TRPM3	Insulin sensitizer, PPAR receptor agonist
6769	-66.33	cp	BRD-A68589262	troxipide	Glucosamine synthetase stimulant			Glucosamine synthetase stimulant
6775	-66.43	cp	BRD-K69032158	diprotin-a	Dipeptidyl peptidase inhibitor		DPP4	Dipeptidyl peptidase inhibitor
6777	-66.48	cp	BRD-K54411430	robustic-acid	cAMP inhibitor			cAMP inhibitor
6778	-66.5	cp	BRD-A41301928	bongkrek-acid	Mitochondrial ADP, ATP translocase inhibitor		SLC25A4	Mitochondrial ADP, ATP translocase inhibitor
6779	-66.5	cp	BRD-A25067867	benzatropine	Acetylcholine receptor antagonist		CHRM1, HRH1, SLC6A3	Acetylcholine receptor antagonist
6780	-66.52	cp	BRD-A23290232	westcort	Glucocorticoid receptor agonist			Glucocorticoid receptor agonist
6782	-66.64	cp	BRD-A10070317	propranolol	Adrenergic receptor antagonist		ADRB2, ADRB3, ADRB1, CYP2C19, HTR1A, HTR1B	Adrenergic receptor antagonist
6784	-66.67	cp	BRD-K18518344	digitoxigenin	ATPase inhibitor		ATP1A1	ATPase inhibitor
6793	-66.81	cp	BRD-A35623999	CGP-37157	L-type calcium channel blocker		SLC8A1	L-type calcium channel blocker, Mitochondrial Na+/Ca2+ exchanger antagonist, Sodium/calcium exchange inhibitor
6799	-67.05	cp	BRD-K45988865	tetramethylsilane	Internal standard for NMR spectroscopy			Internal standard for NMR spectroscopy
6802	-67.09	cp	BRD-K06234293	LY-364947	TGF beta receptor inhibitor		TGFBR1	TGF beta receptor inhibitor, p38 MAPK inhibitor
6810	-67.23	cp	BRD-A10303790	talampicillin	Bacterial cell wall synthesis inhibitor			Bacterial cell wall synthesis inhibitor
6812	-67.26	cp	BRD-K42221274	NNC-711	GAT inhibitor		SLC6A1, SIGMAR1	GAT inhibitor
6816	-67.38	cp	BRD-K45158365	valsartan	Angiotensin receptor antagonist		AGTR1	Angiotensin receptor antagonist
6817	-67.42	cp	BRD-A23072235	pheniramine	Histamine receptor antagonist		HRH1	Histamine receptor antagonist
6820	-67.47	cp	BRD-K48029790	OBAA	Phospholipase inhibitor		PLA2G1B	Phospholipase inhibitor
6827	-67.57	cp	BRD-K71799949	carbamazepine	Carboxamide antiepileptic		ABCB1, CYP1A2, CYP3A4, SCN1A, SCN3A, SCN5A	Carboxamide antiepileptic
6830	-67.67	cp	BRD-A27143604	DPN	Estrogen receptor agonist		ESR2	Estrogen receptor agonist
6831	-67.68	cp	BRD-K10860596	granisetron	Serotonin receptor antagonist		HTR3A, CYP3A5	Serotonin receptor antagonist
6842	-68.01	cp	BRD-K44779798	miglitol	Glucosidase inhibitor		GAA, MGAM, GANAB, GANC, SLC5A4	Glucosidase inhibitor
6846	-68.06	cp	BRD-K19540840	saracatinib	SRC inhibitor		SRC, ABL1, LCK, YES1	SRC inhibitor
6847	-68.06	cp	BRD-A29485665	bicalutamide	Androgen receptor antagonist		AR, CYP2C19	Androgen receptor antagonist
6848	-68.07	cp	BRD-A42553870	L-152804	Neuropeptide receptor antagonist		NPY5R	Neuropeptide receptor antagonist
6850	-68.1	cp	BRD-K27721098	clopidogrel	Purinergic receptor antagonist		P2RY12, CYP2B6, CYP2C19, CYP3A5	Purinergic receptor antagonist
6854	-68.21	cp	BRD-K43736954	cortisone	Glucocorticoid receptor agonist		NR3C1	Glucocorticoid receptor agonist
6855	-68.23	cp	BRD-A56012032	thiorphan	Membrane metalloendopeptidase inhibitor		MME	Membrane metalloendopeptidase inhibitor
6857	-68.28	cp	BRD-K13390322	AT-7519	CDK inhibitor		CDK2, CDK5, CDK1, CDK4, CDK6, CDK9	CDK inhibitor, Cell cycle inhibitor
6858	-68.29	cp	BRD-K38003476	clocortolone	Glucocorticoid receptor agonist		NR3C1, PLA2G1B	Glucocorticoid receptor agonist, Steroid
6864	-68.54	cp	BRD-A83892713	rifampicin	RNA polymerase inhibitor		NR1I2, ABCB1, CYP2B6, CYP2C19, CYP2C8, CYP3A4, CYP3A5, SLCO1A2, SLCO1B1, SLCO1B3	RNA polymerase inhibitor
6866	-68.57	cp	BRD-K18619710	digoxigenin	Steroid		ATP1A1	Steroid
6867	-68.57	cp	BRD-K78485176	olmesartan	Angiotensin receptor antagonist		AGTR1	Angiotensin receptor antagonist
6870	-68.63	cp	BRD-K63945320	dihydrosamidin	Phospholipase inhibitor			Phospholipase inhibitor, Nitric oxide production inhibitor, Platelet activating factor receptor antagonist
6872	-68.65	cp	BRD-K61269089	daphnetin	Protein kinase inhibitor			Protein kinase inhibitor
6873	-68.66	cp	BRD-K68558722	deracoxib	Cyclooxygenase inhibitor		PTGS2	Cyclooxygenase inhibitor
6875	-68.73	cp	BRD-K06147391	telenzepine	Acetylcholine receptor antagonist		CHRM1	Acetylcholine receptor antagonist
6888	-69.01	cp	BRD-A92439610	triamcinolone	Glucocorticoid receptor agonist		NR3C1, CYP3A5, CYP3A7, SERPINA6	Glucocorticoid receptor agonist
6893	-69.06	cp	BRD-A59303141	quinethazone	Thiazide diuretic		CA1, CA2, SLC12A1, SLC12A2, SLC12A3	Thiazide diuretic
6895	-69.09	cp	BRD-A38913120	BH3I-1	BCL inhibitor		BCL2	BCL inhibitor
6896	-69.12	cp	BRD-A07395371	esmolol	Adrenergic receptor antagonist		ADRB1	Adrenergic receptor antagonist
6897	-69.13	cp	BRD-K20197062	SA-94315	Caspase inhibitor		CASP3	Caspase inhibitor
6900	-69.21	cp	BRD-K45330754	diethylstilbestrol	Estrogen receptor agonist		ESR1, ESR2, ESRRG, ESRRB	Estrogen receptor agonist
6904	-69.29	cp	BRD-K15868788	SDZ-205-557	Serotonin receptor antagonist		HTR3A, HTR3B, HTR4	Serotonin receptor antagonist
6906	-69.34	cp	BRD-K64514229	toltrazuril	Antiprotozoal			Antiprotozoal
6907	-69.35	cp	BRD-K97158071	droperidol	Dopamine receptor antagonist		DRD2, ADRA1A	Dopamine receptor antagonist
6912	-69.44	cp	BRD-K29530284	amlexanox	Histamine receptor modulator		FGF1, IL3, S100A12, S100A13	Histamine receptor modulator
6913	-69.5	cp	BRD-K05977355	fluconazole	Sterol demethylase inhibitor		CYP3A5, CYP3A7	Sterol demethylase inhibitor
6917	-69.61	cp	BRD-K41410256	balsalazide	Cyclooxygenase inhibitor		PTGS1, PTGS2, ALOX5, PPARG	Cyclooxygenase inhibitor
6919	-69.77	cp	BRD-K22227508	targinine	Nitric oxide synthase inhibitor		NOS2, NOS3	Nitric oxide synthase inhibitor
6920	-69.78	cp	BRD-K67977190	eprosartan	Angiotensin receptor antagonist		AGTR1	Angiotensin receptor antagonist
6927	-69.9	cp	BRD-A83237092	fulvestrant	Estrogen receptor antagonist		ESR1, EPHX2, ESR2, GPER1	Estrogen receptor antagonist
6930	-69.93	cp	BRD-A60245366	AS-601245	JNK inhibitor		GSK3B, MAPK10, MAPK8, MAPK9, PIM1	JNK inhibitor
6935	-70.03	cp	BRD-K22009844	phenprobamate	Muscle relaxant			Muscle relaxant
6939	-70.11	cp	BRD-K07117950	imperatorin	CDK inhibitor		ACHE, HTR7	CDK inhibitor
6940	-70.12	cp	BRD-A19500257	geldanamycin	HSP inhibitor		HSP90AA1, HSP90AB1	HSP inhibitor
6941	-70.13	cp	BRD-M72442222	vicriviroc	CC chemokine receptor antagonist		CCR5	CC chemokine receptor antagonist
6947	-70.31	cp	BRD-K25224017	pirenperone	Serotonin receptor antagonist		HTR2A, HTR7	Serotonin receptor antagonist
6948	-70.32	cp	BRD-K28183345	proguanil	Dihydrofolate reductase inhibitor		CYP2C19, DHFR	Dihydrofolate reductase inhibitor
6955	-70.51	cp	BRD-K41868777	W-5	Calmodulin antagonist			Calmodulin antagonist
6957	-70.56	cp	BRD-K99696746	fatostatin	SREBP inhibitor		SREBF1, SREBF2	SREBP inhibitor
6966	-70.89	cp	BRD-K96354014	nifedipine	Calcium channel blocker		CACNA1C, CACNA1D, CACNA1S, CACNA2D1, CACNA1F, CACNA1H, CACNB2, CALM1, CYP3A5, GLRA1, GLRA3, GLRB, KCNA1, KCNA5, NR1I2, TRPM3	Calcium channel blocker
6970	-70.98	cp	BRD-K53318339	vinpocetine	Phosphodiesterase inhibitor		PDE1A, PDE1C, SCN10A	Phosphodiesterase inhibitor, Sodium channel blocker
6971	-71.01	cp	BRD-M41783010	acamprosate	Glutamate receptor antagonist		GABRA1, GABRA2, GABRA3, GABRA4, GABRA5, GABRA6, GABRB1, GABRB2, GABRB3, GABRD, GABRE, GABRG1, GABRG2, GABRG3, GABRP, GABRQ, GRIN1, GRIN2A, GRIN2B, GRIN2C, GRIN2D, GRIN3A, GRIN3B, GRM5	Glutamate receptor antagonist
6987	-71.46	cp	BRD-A37492983	iocetamic-acid	Radiopaque medium			Radiopaque medium
6992	-71.65	cp	BRD-K94887716	TFMPP	Serotonin receptor agonist			Serotonin receptor agonist, Serotonin receptor antagonist
6993	-71.65	cp	BRD-A02180903	betamethasone	Glucocorticoid receptor agonist		NR3C1	Glucocorticoid receptor agonist, Anti-inflammatory
6994	-71.66	cp	BRD-A35108200	dexamethasone	Glucocorticoid receptor agonist		ANXA1, CYP3A4, CYP3A5, NOS2, NR0B1, NR3C1, NR3C2	Glucocorticoid receptor agonist
7001	-71.79	cp	BRD-K08252256	diclofenac	Cyclooxygenase inhibitor		PTGS1, PTGS2, AKR1C3, ALOX5, ASIC1, ASIC3, CYP2C8, KCNQ2, KCNQ3, PLA2G2A, PPARG, SCN4A	Cyclooxygenase inhibitor
7003	-71.8	cp	BRD-K00662280	CL-218872	GABA receptor agonist		GABRA1, GABRA2, GABRA3, GABRA5, GABRB2, GABRG2	GABA receptor agonist
7004	-71.84	cp	BRD-K29905972	axitinib	PDGFR receptor inhibitor		KDR, FLT1, FLT4, CSF1, CYP2C19, CYP3A5, KIT, PDGFRB, PLK4	PDGFR receptor inhibitor, VEGFR inhibitor
7005	-71.87	cp	BRD-A95445494	maackiain	Sodium/glucose cotransporter inhibitor		SLC5A2	Sodium/glucose cotransporter inhibitor
7009	-71.98	cp	BRD-A31521121	methocarbamol	Muscle relaxant		CA1	Muscle relaxant
7012	-72.05	cp	BRD-K82562631	tolmetin	Cyclooxygenase inhibitor		PTGS2, PTGS1	Cyclooxygenase inhibitor
7020	-72.26	cp	BRD-K57569181	pentoxifylline	Phosphodiesterase inhibitor		TNF, ACHE, ADORA1, ADORA2A, ADRA2B, CHIA, NT5E, PDE4A, PDE4B, PDE5A	Phosphodiesterase inhibitor
7022	-72.26	cp	BRD-K47323024	methapyrilene	Histamine receptor antagonist			Histamine receptor antagonist
7025	-72.43	cp	BRD-K21283037	riluzole	Glutamate inhibitor		KCND3, KCNK10, KCNK2, KCNK4, KCNN4, SCN5A, SLC7A11	Glutamate inhibitor
7027	-72.46	cp	BRD-A04308630	genipin	Choleretic agent			Choleretic agent
7033	-72.64	cp	BRD-K05737787	isoeugenol	Nitric oxide production inhibitor			Nitric oxide production inhibitor
7038	-72.9	cp	BRD-A62035778	scopolamine	Acetylcholine receptor antagonist		CHRM2, CHRM1, CHRM3, CHRM4, CHRM5, SI	Acetylcholine receptor antagonist
7039	-72.93	cp	BRD-K24994810	androstenol	GABA receptor modulator		NR1I3	GABA receptor modulator
7044	-73.09	cp	BRD-A69512159	carbidopa	Aromatic L-amino acid decarboxylase inhibitor		DDC	Aromatic L-amino acid decarboxylase inhibitor
7046	-73.16	cp	BRD-K15834839	lobendazole	Anthelmintic			Anthelmintic
7049	-73.26	cp	BRD-A52193669	withaferin-a	IKK inhibitor		ACHE, BCHE, IKBKB	IKK inhibitor
7050	-73.31	cp	BRD-K99107520	felbamate	Glutamate receptor antagonist		GRIN2A, GRIN2B, GRIN3A	Glutamate receptor antagonist
7053	-73.4	cp	BRD-A07875874	cilnidipine	Calcium channel blocker		CACNA1B, CACNA1C	Calcium channel blocker
7055	-73.44	cp	BRD-K83508485	FK-888	Tachykinin antagonist		TACR1, TACR2	Tachykinin antagonist
7058	-73.51	cp	BRD-K59773493	benzohydroxamic-acid	Antifungal			Antifungal
7062	-73.63	cp	BRD-K24201553	SB-269970	Serotonin receptor antagonist		HTR7	Serotonin receptor antagonist
7063	-73.65	cp	BRD-K44497846	enalapril	ACE inhibitor		ACE	ACE inhibitor
7069	-73.79	cp	BRD-K14696368	9-methyl-5H-6-thia-4,5-diaza-chrysene-6,6-dioxide	NFkB pathway inhibitor		RELA	NFkB pathway inhibitor
7070	-73.83	cp	BRD-A97730597	hexylcaine	Sodium channel blocker		SCN5A, SCN10A	Sodium channel blocker
7072	-73.85	cp	BRD-K10852020	tolcapone	Catechol O methyltransferase inhibitor		COMT, TTR	Catechol O methyltransferase inhibitor
7074	-73.91	cp	BRD-K33211335	dextromethorphan	Glutamate receptor antagonist		SIGMAR1, CHRNA2, CHRNA3, CHRNA4, CHRNA7, CHRNB2, CHRNB4, CYBA, CYBB, CYP3A5, GRIN1, GRIN3A, NCF1, NCF2, NCF4, OPRD1, OPRK1, OPRM1, PGRMC1, RAC1, RAC2, SLC6A2, SLC6A4	Glutamate receptor antagonist, Sigma receptor agonist
7075	-73.91	cp	BRD-A67373739	AICA-ribonucleotide	AMPK activator		ATIC, PRKAA1	AMPK activator
7077	-74.02	cp	BRD-K53561341	KIN001-220	Aurora kinase inhibitor		AURKA	Aurora kinase inhibitor
7080	-74.17	cp	BRD-A54487287	cortisone	Glucocorticoid receptor agonist		NR3C1	Glucocorticoid receptor agonist
7085	-74.22	cp	BRD-K87024524	phenelzine	Monoamine oxidase inhibitor		MAOB, AOC3, MAOA, ABAT, GAD2, GPT, GPT2, SLC6A2, SLC6A3, SLC6A4	Monoamine oxidase inhibitor
7086	-74.22	cp	BRD-K78280988	anandamide	Cannabinoid receptor agonist		CNR1, CNR2, TRPV1, CACNA1G, CACNA1H, CACNA1I, GLRA1, GPR119, GPR18, GPR55, KCNA2, KCND3, KCNK3, KCNK9, TRPM8	Cannabinoid receptor agonist
7091	-74.32	cp	BRD-A51410489	yohimbine	Adrenergic receptor antagonist		ADRA2A, ADRA2C, ADRA2B, HTR1A, HTR1B, HTR1D, HTR2B, DRD2, DRD3, HTR1E, HTR1F, HTR2A, HTR2C, HTR5A, HTR7, KCNJ1, KCNJ10, KCNJ11, KCNJ12, KCNJ14, KCNJ15, KCNJ8	Adrenergic receptor antagonist
7095	-74.45	cp	BRD-A16754160	ampicillin	Bacterial cell wall synthesis inhibitor		SLC15A1	Bacterial cell wall synthesis inhibitor
7096	-74.46	cp	BRD-K97752965	nicorandil	Nitric oxide donor		ABCC9, KCNJ11, KCNJ8	Nitric oxide donor, Potassium channel activator
7098	-74.52	cp	BRD-K22878149	SB-205607	Delta 1 opioid receptor agonist		OPRD1, OPRK1, OPRM1	Delta 1 opioid receptor agonist
7109	-74.72	cp	BRD-K82795137	loratadine	Histamine receptor antagonist		HRH1, CYP2C19, CYP3A5	Histamine receptor antagonist
7110	-74.73	cp	BRD-K57886322	fluocinonide	Glucocorticoid receptor agonist		NR3C1, SERPINA6, SMO	Glucocorticoid receptor agonist
7113	-74.76	cp	BRD-A63546914	RO-04-5595	Glutamate receptor antagonist			Glutamate receptor antagonist
7120	-74.94	cp	BRD-K51318897	fenbendazole	Tubulin inhibitor		CYP2C19, CYP2D6, CYP2J2, CYP3A4, TUBB	Tubulin inhibitor
7122	-74.94	cp	BRD-K11853856	PJ-34	PARP inhibitor		EEF2, PARP1, PARP15, PARP3	PARP inhibitor
7124	-75	cp	BRD-K70401845	erlotinib	EGFR inhibitor		EGFR, NR1I2	EGFR inhibitor
7126	-75.03	cp	BRD-K76698671	HNHA	HDAC inhibitor		HDAC1	HDAC inhibitor
7128	-75.06	cp	BRD-K31553034	zibotentan	Endothelin receptor antagonist		EDNRA	Endothelin receptor antagonist
7131	-75.14	cp	BRD-K87226815	cycloserine	Bacterial cell wall synthesis inhibitor		GRIN1	Bacterial cell wall synthesis inhibitor
7132	-75.16	cp	BRD-A41304429	practolol	Adrenergic receptor antagonist		ADRB1	Adrenergic receptor antagonist
7136	-75.21	cp	BRD-K37289225	clozapine	Dopamine receptor antagonist		DRD2, DRD4, ADRA1A, ADRA1B, CHRM1, DRD1, DRD3, HRH1, HRH4, HTR1A, HTR1B, HTR1D, HTR1E, HTR2A, HTR2C, HTR6, HTR7, ADRA1D, ADRA2A, ADRA2B, ADRA2C, CALY, CHRM2, CHRM3, CHRM4, CHRM5, CYP2C19, DRD5, HTR1F, HTR2B, HTR3A, HTR5A	Dopamine receptor antagonist, Serotonin receptor antagonist
7139	-75.27	cp	BRD-K28912512	nicotinamide	Protein synthesis stimulant		PARP1, AOX1, BST1, CYP2E1, LDHA, SIRT5	Protein synthesis stimulant
7141	-75.33	cp	BRD-K88568253	iproniazid	Monoamine oxidase inhibitor		MAOA, MAOB	Monoamine oxidase inhibitor
7143	-75.41	cp	BRD-K08556791	ethoprop	Acetylcholinesterase inhibitor		ACHE	Acetylcholinesterase inhibitor
7145	-75.52	cp	BRD-K25394294	oxaprozin	Cyclooxygenase inhibitor		PTGS1, PTGS2	Cyclooxygenase inhibitor
7147	-75.65	cp	BRD-A22256192	terazosin	Adrenergic receptor antagonist		ADRA1D, ADRA1A, ADRA1B, KCNH2, KCNH6, KCNH7	Adrenergic receptor antagonist
7149	-75.74	cp	BRD-K86434416	selegiline	Monoamine oxidase inhibitor		MAOB, MAOA, CYP2B6, CYP2C19	Monoamine oxidase inhibitor
7154	-75.89	cp	BRD-A65671304	candesartan	Angiotensin receptor antagonist		AGTR1, AGTR2	Angiotensin receptor antagonist
7158	-76.04	cp	BRD-A49906757	scopolamine	Acetylcholine receptor antagonist		CHRM2, CHRM1, CHRM3, CHRM4, CHRM5, SI	Acetylcholine receptor antagonist
7162	-76.1	cp	BRD-A39415247	norethisterone	Progesterone receptor agonist		PGR	Progesterone receptor agonist
7164	-76.26	cp	BRD-K32318651	acyclovir	DNA polymerase inhibitor		PNP	DNA polymerase inhibitor
7165	-76.31	cp	BRD-K32398298	alprazolam	Benzodiazepine receptor agonist		GABRA1, GABRA2, GABRA3, GABRA5, CYP3A5, GABRA4, GABRA6, GABRB1, GABRB2, GABRB3, GABRD, GABRE, GABRG1, GABRG2, GABRG3, GABRP, GABRQ	Benzodiazepine receptor agonist
7166	-76.33	cp	BRD-K52219182	BRD-K52219182	Phosphodiesterase inhibitor			Phosphodiesterase inhibitor
7171	-76.5	cp	BRD-K07736136	VX-702	p38 MAPK inhibitor		MAPK14, MAPK11, MAPK12	p38 MAPK inhibitor
7172	-76.54	cp	BRD-K94649603	taxifolin	Opioid receptor antagonist		APOB, APP, HMGCR	Opioid receptor antagonist
7173	-76.55	cp	BRD-K08132273	tyrphostin	EGFR inhibitor		ERBB2	EGFR inhibitor
7175	-76.62	cp	BRD-K89125793	tinidazole	Antiprotozoal			Antiprotozoal
7180	-76.7	cp	BRD-K15916496	clotrimazole	Cytochrome P450 inhibitor		KCNN4, CYP3A4, CYP51A1, NR1I2, NR1I3, TRPM2, TRPM4, TRPM8	Cytochrome P450 inhibitor, Imidazoline receptor ligand
7186	-76.82	cp	BRD-K15935639	z-leu3-VS	Proteasome inhibitor			Proteasome inhibitor
7188	-76.84	cp	BRD-K14643723	4-(2-Amino-ethyl)-benzenesulfonamide	carbonic anhydrase inhibitor		CA2, CA1, CA9, CA12, CA14, CA4	carbonic anhydrase inhibitor
7191	-76.98	cp	BRD-A65767837	hydrocortisone	Glucocorticoid receptor agonist		ANXA1, NOS2, NR3C1, NR3C2	Glucocorticoid receptor agonist
7196	-77.05	cp	BRD-K11905747	spectinomycin	Bacterial 30S ribosomal subunit inhibitor			Bacterial 30S ribosomal subunit inhibitor
7197	-77.06	cp	BRD-K32977963	eugenol	Androgen receptor antagonist		AR, MAOA	Androgen receptor antagonist
7198	-77.06	cp	BRD-K06388322	pramipexole	Dopamine receptor agonist		DRD3, DRD2, ADRA2A, ADRA2B, ADRA2C, DRD1, DRD4, DRD5, HTR1A, HTR1B, HTR1D, HTR2A, HTR2B, HTR2C	Dopamine receptor agonist
7199	-77.09	cp	BRD-K62609077	scoulerine	Adrenergic receptor antagonist		ADRA1D, ADRA2A, GABRA1	Adrenergic receptor antagonist, GABA receptor antagonist, Serotonin receptor antagonist
7201	-77.17	cp	BRD-A66435872	HTMT	Histamine receptor agonist		HRH4	Histamine receptor agonist
7205	-77.27	cp	BRD-A83937277	mephenytoin	Hydantoin antiepileptic		SCN5A, CYP2C19	Hydantoin antiepileptic
[truncated: 430 more rows]

## Sheet: TOB2
Rank	Score	Type	ID	Name	Description	CMap Class	Target	MOA
16	99.93	cp	BRD-K99498722	NPI-2358	Tubulin inhibitor			Tubulin inhibitor
17	99.93	cp	BRD-K35687265	ON-01910	PLK inhibitor		CDK1, FLT1, FYN, MCL1, PDGFRA, PLK1, PLK2, SRC	PLK inhibitor
18	99.93	cp	BRD-K25504083	cytochalasin-d	Actin polymerization inhibitor		ACTB	Actin polymerization inhibitor
25	99.89	cp	BRD-K91145395	prostratin	PKC activator		PRKCA, PRKCB, PRKCD, PRKCE, PRKCG, PRKCH, PRKCQ	PKC activator
26	99.89	cp	BRD-K53913732	SB-408124	Orexin receptor antagonist		HCRTR1, HCRTR2	Orexin receptor antagonist
27	99.89	cp	BRD-A80017228	bendroflumethiazide	Sodium/potassium/chloride transporter inhibitor		SLC12A3, CA1, CA2, CA4, KCNMA1, SLC12A1	Sodium/potassium/chloride transporter inhibitor
28	99.89	cp	BRD-A09062839	amylocaine	Local anesthetic			Local anesthetic
34	99.89	cp	BRD-K37456065	VU-0365114-2	M5 modulator		CHRM5	M5 modulator
40	99.86	cp	BRD-A52650764	ingenol	PKC activator		PRKCD, PRKCE	PKC activator
44	99.82	cp	BRD-A15079084	phorbol-12-myristate-13-acetate	PKC activator		CD4, KCNT2, PRKCA, TRPV4	PKC activator
45	99.82	cp	BRD-K30677119	PP-30	RAF inhibitor		RAF1	RAF inhibitor
58	99.72	cp	BRD-K59753975	vindesine	Tubulin inhibitor		TUBB, TUBB1	Tubulin inhibitor
64	99.68	cp	BRD-K91623615	ABT-751	Tubulin inhibitor		TUBB	Tubulin inhibitor
65	99.65	cp	BRD-K92991072	PAC-1	Caspase activator		CASP3	Caspase activator
69	99.61	cp	BRD-K86003836	flubendazole	Tubulin inhibitor		TUBB	Tubulin inhibitor
77	99.58	cp	BRD-K37865504	LY-2183240	FAAH inhibitor		FAAH	FAAH inhibitor
79	99.54	cp	BRD-K72034655	peucedanin	Apoptosis stimulant			Apoptosis stimulant
82	99.51	cp	BRD-A54927599	KF-38789	P-selectin inhibitor		SELP	P-selectin inhibitor
83	99.51	cp	BRD-K51318897	fenbendazole	Tubulin inhibitor		CYP2C19, CYP2D6, CYP2J2, CYP3A4, TUBB	Tubulin inhibitor
87	99.44	cp	BRD-K70511574	sunitinib	PLK inhibitor		FLT3, KDR, KIT, FLT4, FLT1, PDGFRA, PDGFRB, RET, CSF1R, FGFR1	PLK inhibitor
88	99.44	cp	BRD-K62012036	acitretin	Retinoid receptor agonist		RARA, RARB, RARG, RBP1, RXRA, RXRB, RXRG, STAT3	Retinoid receptor agonist
89	99.44	cp	BRD-K26997899	SA-792574	Microtubule inhibitor		TUBB	Microtubule inhibitor
90	99.44	cp	BRD-K79131256	albendazole	Anthelmintic		CYP1A2, CYP2J2, TUBA1A, TUBB, TUBB4B	Anthelmintic, Tubulin inhibitor
91	99.44	cp	BRD-K22096725	ALW-II-49-7	Ephrin inhibitor		DDR1, EPHA2, EPHA4, EPHA7, EPHB2, EPHB4, EPHB6	Ephrin inhibitor
92	99.44	cp	BRD-K29733039	deforolimus	MTOR inhibitor		MTOR	MTOR inhibitor
95	99.37	cp	BRD-K47983010	BX-795	IKK inhibitor		PDPK1, CDK2, CHEK1, GSK3B, IKBKE, KDR, PDK1, TBK1	IKK inhibitor
106	99.22	cp	BRD-K77987382	mebendazole	Tubulin inhibitor		TUBA1A, TUBB, TUBB4B	Tubulin inhibitor
113	99.15	cp	BRD-M30523314	vinorelbine	Tubulin inhibitor		TUBB	Tubulin inhibitor
114	99.15	cp	BRD-K09638361	SA-63133	-666		CSNK1E, CSNK1A1, CSNK1D, CSNK1G2	-666
117	99.12	cp	BRD-K53523901	arctigenin	MEK inhibitor		ADIPOR1, AHR, CHUK, MAP2K1	MEK inhibitor
121	99.08	cp	BRD-K55420858	mirin	MRE11A exonuclease inhibitor		MRE11A	MRE11A exonuclease inhibitor
123	99.08	cp	BRD-K12539581	nocodazole	Tubulin inhibitor		HPGDS	Tubulin inhibitor
124	99.05	cp	BRD-K61323504	SB-225002	CC chemokine receptor antagonist		CXCR2	CC chemokine receptor antagonist
125	99.05	cp	BRD-A27554692	altrenogest	Progestogen hormone		PGR	Progestogen hormone
129	99.01	cp	BRD-K95655893	MAZ-51	VEGFR inhibitor		FLT4	VEGFR inhibitor
130	99.01	cp	BRD-K52075715	oxibendazole	Tubulin inhibitor		TUBB, TUBB4B	Tubulin inhibitor
132	99.01	cp	BRD-K47869605	podophyllotoxin	Microtubule inhibitor		IGF1R, CASP3, TOP2A, TUBA4A, TUBB	Microtubule inhibitor, Tubulin inhibitor
133	98.97	cp	BRD-K52313696	tacedinaline	HDAC inhibitor		HDAC1	HDAC inhibitor
139	98.87	cp	BRD-A55594068	vinblastine	Microtubule inhibitor		TUBB, JUN, TUBA1A, TUBD1, TUBE1, TUBG1	Microtubule inhibitor, Tubulin inhibitor
140	98.87	cp	BRD-K15262564	mupirocin	Isoleucyl-tRNA synthetase inhibitor			Isoleucyl-tRNA synthetase inhibitor
145	98.82	cp	BRD-A32161980	carbetocin	Oxytocin receptor agonist		OXTR	Oxytocin receptor agonist
147	98.8	cp	BRD-K96471533	nitazoxanide	Pyruvate ferredoxin oxidoreductase inhibitor			Pyruvate ferredoxin oxidoreductase inhibitor
149	98.7	cp	BRD-K82109576	vincristine	Tubulin inhibitor		TUBB, TUBA4A	Tubulin inhibitor
153	98.66	cp	BRD-K28761384	zuclopenthixol	Dopamine receptor antagonist		DRD2, DRD1, ADRA1A, ADRA2A, DRD5, HRH1, HTR2A	Dopamine receptor antagonist
155	98.61	cp	BRD-A34208323	VU-0404997-2	Glutamate receptor modulator		GRM4	Glutamate receptor modulator
158	98.57	cp	BRD-K59773493	benzohydroxamic-acid	Antifungal			Antifungal
160	98.48	cp	BRD-K77908580	entinostat	HDAC inhibitor		HDAC1, HDAC2, HDAC3, HDAC9	HDAC inhibitor
166	98.44	cp	BRD-K54095730	CMPD-1	p38 MAPK inhibitor		GNRHR, MAPK14	p38 MAPK inhibitor
173	98.37	cp	BRD-K29113274	ketoconazole	Sterol demethylase inhibitor		AR, CYP19A1, CYP21A2, CYP2C19, CYP3A5, CYP3A7, KCNA10	Sterol demethylase inhibitor
177	98.07	cp	BRD-K59419204	AM-281	Cannabinoid receptor antagonist		CNR1, CNR2, GPR55	Cannabinoid receptor antagonist
179	98.06	cp	BRD-K09778810	FGIN-1-27	Inositol monophosphatase inhibitor		TSPO	Inositol monophosphatase inhibitor
185	97.96	cp	BRD-K74733595	APHA-compound-8	HDAC inhibitor		HDAC8	HDAC inhibitor
186	97.96	cp	BRD-U51951544	ZG-10	JNK inhibitor		MAPK8	JNK inhibitor
188	97.91	cp	BRD-K02965346	SU-11274	Hepatocyte growth factor receptor inhibitor		MET	Hepatocyte growth factor receptor inhibitor, Tyrosine kinase inhibitor
189	97.89	cp	BRD-K70241288	L-692585	Growth hormone releasing peptide ligand agonist		GH1, GHSR	Growth hormone releasing peptide ligand agonist
192	97.82	cp	BRD-A28105619	cucurbitacin-i	JAK inhibitor		JAK2, STAT3	JAK inhibitor, Lipocortin synthesis stimulant, STAT inhibitor
200	97.61	cp	BRD-K99616396	motesanib	KIT inhibitor		FLT1, FLT4, KDR, KIT, PDGFRA, RET	KIT inhibitor, PDGFR receptor inhibitor, VEGFR inhibitor
201	97.61	cp	BRD-K30867024	SB-216641	Serotonin receptor antagonist		HTR1B, HTR1D, HTR1A, HTR2A, HTR2B, HTR2C	Serotonin receptor antagonist
208	97.48	cp	BRD-K03981224	ethisterone	Progestogen hormone		TYR	Progestogen hormone
209	97.43	cp	BRD-K11663430	pyroxamide	HDAC inhibitor		HDAC1	HDAC inhibitor
210	97.43	cp	BRD-K54665485	R-59022	Diacylglycerol kinase inhibitor		DGKA	Diacylglycerol kinase inhibitor, Protein kinase inhibitor
215	97.24	cp	BRD-K71823332	epothilone-a	Microtubule stabilizing agent			Microtubule stabilizing agent
217	97.21	cp	BRD-A16665823	butoconazole	Bacterial cell wall synthesis inhibitor			Bacterial cell wall synthesis inhibitor
219	97.14	cp	BRD-K77625572	etomoxir	Carnitine palmitoyltransferase inhibitor		CPT1A, CPT1B	Carnitine palmitoyltransferase inhibitor
220	97.08	cp	BRD-K76698671	HNHA	HDAC inhibitor		HDAC1	HDAC inhibitor
224	96.93	cp	BRD-K14329163	BAY-K8644	Calcium channel activator		CACNA1C	Calcium channel activator, L-type calcium channel activator
225	96.93	cp	BRD-K20152659	gamma-homolinolenic-acid	Cholesterol inhibitor		PTGS1, PTGS2	Cholesterol inhibitor, Platelet aggregation inhibitor, Prostanoid receptor agonist, Prostanoid receptor stimulant
229	96.83	cp	BRD-A28746609	paclitaxel	Tubulin inhibitor		TUBB, NR1I2, ABCB1, BCL2, CYP2C8, MAP2, MAP4, MAPT, TLR4, TUBB1	Tubulin inhibitor
232	96.76	cp	BRD-K04466929	Merck60	HDAC inhibitor		HDAC1, HDAC2	HDAC inhibitor
235	96.73	cp	BRD-K40227168	vinburnine	Adrenergic receptor antagonist		CHRM1, CHRM2, CHRM3, CHRM4	Adrenergic receptor antagonist
236	96.72	cp	BRD-K11433652	aspirin	Cyclooxygenase inhibitor		PTGS1, PTGS2, TP53, AKR1C1, ASIC3, EDNRA, HSPA5, IKBKB, NFKB1, NFKB2, NFKBIA, PRKAA1, PRKAA2, PRKAB1, PRKAB2, PRKAG1, PRKAG2, PRKAG3, RPS6KA3	Cyclooxygenase inhibitor
253	96.38	cp	BRD-K02407574	parbendazole	Tubulin inhibitor		TUBB	Tubulin inhibitor
254	96.37	cp	BRD-K56596464	QX-314	Sodium channel blocker		MAPK14, TGFBR1	Sodium channel blocker
256	96.36	cp	BRD-K83289131	CAY-10618	NAMPT inhibitor		NAMPT	NAMPT inhibitor
266	96.18	cp	BRD-K84895041	BMY-45778	IP1 prostacyclin receptor agonist		PTGIR	IP1 prostacyclin receptor agonist
267	96.17	cp	BRD-K04196797	oxcarbazepine	Sodium channel blocker		CYP2C19, CYP3A4, CYP3A5, SCN1A, SCN3A, SCN5A	Sodium channel blocker
268	96.16	cp	BRD-A62182663	YK-4279	Apoptosis stimulant		DHX9, EWSR1, FLI1	Apoptosis stimulant, EWS-FLI1 inhibitor
269	96.16	cp	BRD-A45333398	periplocymarin	Apoptosis stimulant			Apoptosis stimulant
273	96.06	cp	BRD-A72703248	SKF-96365	Calcium channel blocker		CYP3A4, TRPC1, PKD2, TRPC3, TRPC4, TRPC5, TRPV2	Calcium channel blocker
276	95.95	cp	BRD-A07875874	cilnidipine	Calcium channel blocker		CACNA1B, CACNA1C	Calcium channel blocker
282	95.72	cp	BRD-K48427617	U-0124	MEK inhibitor			MEK inhibitor
286	95.67	cp	BRD-K48935217	epothilone	Microtubule inhibitor		TUBA1A, TUBA1B, TUBA1C, TUBA3C, TUBA4A, TUBA8, TUBB, TUBB1, TUBB3, TUBB4A, TUBB4B	Microtubule inhibitor
287	95.65	cp	BRD-K78278890	NM-PP1	Mutant kinase inhibitor		CAMK2A, LCK, MAPK8, PRKACA, RIPK2, SRC	Mutant kinase inhibitor
288	95.6	cp	BRD-K79425933	benperidol	Dopamine receptor antagonist		DRD2	Dopamine receptor antagonist
294	95.39	cp	BRD-K07691486	roscovitine	CDK inhibitor		CDK2, CDK9, CDK7, CDK1, CDK5	CDK inhibitor
296	95.23	cp	BRD-K85503079	perospirone	Dopamine receptor antagonist		DRD2, HTR2A, DRD3, DRD4, HTR2C	Dopamine receptor antagonist, Serotonin receptor antagonist
304	94.98	cp	BRD-A16311756	profenamine	Butyrylcholinesterase inhibitor		CHRM1, BCHE, CHRM2, GRIN3A	Butyrylcholinesterase inhibitor, Cholinergic receptor antagonist
307	94.84	cp	BRD-K63265447	docetaxel	Tubulin inhibitor		TUBB, BCL2, MAP2, MAP4, MAPT, NR1I2, TUBB1	Tubulin inhibitor
309	94.77	cp	BRD-K12184916	dactolisib	MTOR inhibitor		MTOR, PIK3CA, PIK3CG, PIK3CD, ATR, PIK3CB	MTOR inhibitor, PI3K inhibitor, Protein kinase inhibitor
315	94.43	cp	BRD-K19220233	JNK-9L	JNK inhibitor		MAPK8	JNK inhibitor
318	94.36	cp	BRD-K67566344	KU-0063794	MTOR inhibitor		MTOR	MTOR inhibitor
321	94.18	cp	BRD-K19554809	MK-212	Serotonin receptor agonist		HTR2A, HTR2B, HTR2C	Serotonin receptor agonist
325	94.11	cp	BRD-K00615600	AG-14361	PARP inhibitor		PARP1	PARP inhibitor
328	94.06	cp	BRD-A45498368	WYE-125132	MTOR inhibitor		MTOR, PIK3CA	MTOR inhibitor
329	94.06	cp	BRD-K57886322	fluocinonide	Glucocorticoid receptor agonist		NR3C1, SERPINA6, SMO	Glucocorticoid receptor agonist
330	94.03	cp	BRD-K04833372	GSK-1904529A	IGF-1 inhibitor		IGF1R, INSR	IGF-1 inhibitor, IGF-1R inhibitor, Insulin receptor ligand
331	94.01	cp	BRD-K13049116	BMS-754807	IGF-1 inhibitor		IGF1R, AKT1	IGF-1 inhibitor
332	94.01	cp	BRD-K19533706	tranilast	Angiogenesis inhibitor		HPGDS, HRH1, IDO1, IFNG, IL10, IL2, IL4, SLC22A12, TGFB1, TNF, TRPV2	Angiogenesis inhibitor
346	93.72	cp	BRD-K54416256	methimazole	Antithyroid		TPO	Antithyroid
350	93.59	cp	BRD-A32836748	leu-enkephalin	Opioid receptor agonist		OPRD1, OPRM1	Opioid receptor agonist
354	93.54	cp	BRD-K05926469	lenalidomide	Antineoplastic		CRBN, TNF, CDH5, PTGS2, TNFSF11	Antineoplastic
367	93.27	cp	BRD-A62184259	cycloheximide	Protein synthesis inhibitor		GSK3B, RPL3	Protein synthesis inhibitor
380	92.8	cp	BRD-A65013509	oxybutynin	Acetylcholine receptor antagonist		CHRM3, CHRM1, CHRM2, CHRM4	Acetylcholine receptor antagonist
381	92.77	cp	BRD-A03816571	CP-55940	Cannabinoid receptor agonist		CNR1, CNR2, CXCR4, GPR55	Cannabinoid receptor agonist
385	92.69	cp	BRD-A81795050	U-18666A	Oxidosqualene cyclase inhibitor			Oxidosqualene cyclase inhibitor
388	92.51	cp	BRD-K52751261	TAK-715	p38 MAPK inhibitor		MAPK14, TNF	p38 MAPK inhibitor
391	92.45	cp	BRD-K68246049	TTNPB	Retinoid receptor agonist		RARB, RARA, RARG	Retinoid receptor agonist
392	92.38	cp	BRD-A15297126	fluocinonide	Glucocorticoid receptor agonist		NR3C1, SERPINA6, SMO	Glucocorticoid receptor agonist
393	92.31	cp	BRD-K70281171	U-99194	Dopamine receptor antagonist		DRD3	Dopamine receptor antagonist
395	92.25	cp	BRD-K89997465	chlorpromazine	Dopamine receptor antagonist		DRD2, ADRA2A, ADRA2B, ADRA2C, DRD1, DRD3, DRD4, DRD5, HRH1, HTR1A, HTR2A, HTR2C, HTR6, HTR7, ADRA1A, ADRA1B, ADRA1D, CALM1, CHRM1, CHRM3, HRH4, HTR2B, KCNH2, KIF11, ORM1, ORM2, SMPD1, TRPC5	Dopamine receptor antagonist
402	91.99	cp	BRD-K13725475	rhodomyrtoxin	Cytotoxic agent			Cytotoxic agent, DNA intercalator
404	91.94	cp	BRD-K90382497	GW-843682X	PLK inhibitor		PLK1, PLK3	PLK inhibitor
405	91.93	cp	BRD-A55484088	BNTX	Opioid receptor antagonist		OPRD1, OPRK1, OPRM1	Opioid receptor antagonist
410	91.86	cp	BRD-K39569857	avrainvillamide-analog-3	nucleophosmin inhibitor		NPM1	nucleophosmin inhibitor
414	91.69	cp	BRD-A29901043	KIN001-127	ITK inhibitor		ITK	ITK inhibitor
416	91.45	cp	BRD-K32107296	temozolomide	DNA alkylating agent		TOP2A	DNA alkylating agent
420	91.31	cp	BRD-K89348303	ramipril	ACE inhibitor		ACE	ACE inhibitor
422	91.2	cp	BRD-A42423104	benproperine	Antitussive			Antitussive
428	90.98	cp	BRD-M45964048	verteporfin	Photosensitizing agent			Photosensitizing agent
429	90.96	cp	BRD-A41555725	chlortetracycline	Protein synthesis inhibitor			Protein synthesis inhibitor
431	90.91	cp	BRD-K93433262	alfacalcidol	Vitamin D receptor agonist		VDR, CYP27B1, CYP3A5	Vitamin D receptor agonist
439	90.6	cp	BRD-K48168960	propylthiouracil	Thyroid peroxidase inhibitor		TPO, DIO1	Thyroid peroxidase inhibitor
440	90.6	cp	BRD-K28360340	TW-37	BCL inhibitor		BCL2, BCL2L1, MCL1	BCL inhibitor
442	90.52	cp	BRD-K94294671	OSI-027	MTOR inhibitor		MTOR	MTOR inhibitor
447	90.33	cp	BRD-K20714604	RS-56812	Serotonin receptor partial agonist		HTR3A	Serotonin receptor partial agonist
453	90.11	cp	BRD-K94841585	emodic-acid	Laxative			Laxative
455	90.02	cp	BRD-M47937986	cefatrizine	Bacterial cell wall synthesis inhibitor			Bacterial cell wall synthesis inhibitor
462	89.8	cp	BRD-A30815329	felodipine	Calcium channel blocker		CACNA1C, CACNA1D, CACNA1H, CACNA1S, CACNA2D1, CACNA2D2, CACNB2, CALM1, CFTR, NR3C2, PDE1A, PDE1B, TNNC1, TNNC2	Calcium channel blocker
464	89.7	cp	BRD-K57546357	prunetin	Breast cancer resistance protein inhibitor		ABCG2, ALDH2	Breast cancer resistance protein inhibitor
468	89.62	cp	BRD-K80725632	lavendustin-c	EGFR inhibitor		CAMK2A, EGFR, SRC	EGFR inhibitor
470	89.59	cp	BRD-K92301463	16,16-dimethylprostaglandin-e2	Prostanoid receptor agonist		HPGD	Prostanoid receptor agonist
476	89.29	cp	BRD-K77008974	WYE-354	MTOR inhibitor		MTOR	MTOR inhibitor
484	89.15	cp	BRD-K15600710	obatoclax	BCL inhibitor		BCL2, BCL2L1, MCL1	BCL inhibitor
488	89.01	cp	BRD-K82143716	flucytosine	Antifungal		DNMT1	Antifungal
490	88.85	cp	BRD-K02526760	QS-11	ARFGAP inhibitor		ARFGAP1	ARFGAP inhibitor
491	88.68	cp	BRD-K02590140	O-2050	Cannabinoid receptor antagonist		CNR1	Cannabinoid receptor antagonist
492	88.63	cp	BRD-K43068349	AMG-9810	TRPV antagonist		TRPV1	TRPV antagonist
500	88.38	cp	BRD-A11007541	BCI-hydrochloride	Protein phosphatase inhibitor		DUSP1, DUSP6	Protein phosphatase inhibitor
504	88.23	cp	BRD-K60476892	YC-1	Guanylyl cyclase activator		HIF1A, GUCY1A2, GUCY1A3, GUCY1B3	Guanylyl cyclase activator
508	88.21	cp	BRD-K17868609	BRL-54443	Serotonin receptor agonist		HTR1E, HTR1F	Serotonin receptor agonist
510	88.15	cp	BRD-K60174629	z-prolyl-prolinal	Prolyl endopeptidase inhibitor		PREP	Prolyl endopeptidase inhibitor
511	88.14	cp	BRD-A77299732	salubrinal	Eukaryotic translation initiation factor inhibitor		EIF2S1, SLC6A9	Eukaryotic translation initiation factor inhibitor
517	87.91	cp	BRD-K52397688	amperozide	Dopamine receptor antagonist		HTR2A, DRD2, FAAH	Dopamine receptor antagonist
518	87.89	cp	BRD-A29082194	gitoxigenin	ATPase inhibitor		ATP1A1	ATPase inhibitor
522	87.84	cp	BRD-M07438658	lapatinib	EGFR inhibitor		EGFR, ERBB2, CYP3A5	EGFR inhibitor, ErbB2 inhibitor
523	87.81	cp	BRD-K17140735	SCH-79797	Proteasome inhibitor		F2R	Proteasome inhibitor
525	87.76	cp	BRD-K35128472	2-aminopurine	Serine/threonine kinase inhibitor			Serine/threonine kinase inhibitor
529	87.63	cp	BRD-K63606607	bufalin	ATPase inhibitor		ATP1A1	ATPase inhibitor
530	87.63	cp	BRD-K65814004	diphenyleneiodonium	Nitric oxide synthase inhibitor		ALDH1A2, ALDH2, ALDH5A1, ALDH7A1, NOX3, XDH	Nitric oxide synthase inhibitor
531	87.54	cp	BRD-K06878038	deferiprone	Chelating agent		CYP4F2	Chelating agent
536	87.31	cp	BRD-A18043272	phensuximide	Succinimide antiepileptic			Succinimide antiepileptic
545	87.03	cp	BRD-K11905747	spectinomycin	Bacterial 30S ribosomal subunit inhibitor			Bacterial 30S ribosomal subunit inhibitor
552	86.86	cp	BRD-K59962020	CHEMBL-374350	NFkB pathway inhibitor			NFkB pathway inhibitor
558	86.47	cp	BRD-K13571841	pepstatin	Aspartic protease inhibitor		CTSB, CTSD, CTSL, REN	Aspartic protease inhibitor
559	86.43	cp	BRD-K78431006	crizotinib	ALK inhibitor		ALK, MET, CYP2B6, CYP3A5, MST1R, ROS1	ALK inhibitor
564	86.29	cp	BRD-K70881766	solanine	Acetylcholinesterase inhibitor			Acetylcholinesterase inhibitor
567	86.17	cp	BRD-K76805682	SB-415286	Glycogen synthase kinase inhibitor		GSK3B, GSK3A, RPS6KB1	Glycogen synthase kinase inhibitor
569	86.05	cp	BRD-K80725821	RS-16566	Serotonin receptor antagonist			Serotonin receptor antagonist
570	86	cp	BRD-K46317332	proadifen	Nitric oxide synthase inhibitor		NOS1	Nitric oxide synthase inhibitor
578	85.49	cp	BRD-K70490179	rimcazole	Sigma receptor antagonist		SIGMAR1	Sigma receptor antagonist
581	85.37	cp	BRD-A33833419	TER-14687	Inhibitor of translocation of PKCq in T cells		PRKCQ	Inhibitor of translocation of PKCq in T cells
586	85.15	cp	BRD-K32744045	disulfiram	Aldehyde dehydrogenase inhibitor		ALDH2, ALDH1A2, ALDH5A1, ALDH7A1, CYP2E1, DBH, DNMT1, TRPA1	Aldehyde dehydrogenase inhibitor, TRPV agonist, DNA methyltransferase inhibitor
591	85.01	cp	BRD-A51820102	econazole	Bacterial cell wall synthesis inhibitor		CYP51A1, NPY1R, NPY2R, TRPM2, TRPV5	Bacterial cell wall synthesis inhibitor, Lanosterol demethylase inhibitor, Sterol demethylase inhibitor
593	84.96	cp	BRD-K23922020	arecaidine	Acetylcholine receptor agonist		CHRM1, CHRM2, CHRM3, CHRM4	Acetylcholine receptor agonist
599	84.64	cp	BRD-K85133207	HDAC1-selective	HDAC inhibitor			HDAC inhibitor
602	84.44	cp	BRD-K74112339	acetohydroxamic-acid	Urease inhibitor			Urease inhibitor
604	84.39	cp	BRD-K46424862	hymecromone	Monoamine oxidase inhibitor		MAOA	Monoamine oxidase inhibitor
606	84.29	cp	BRD-K26664453	cytochalasin-b	Microtubule inhibitor		ACTB	Microtubule inhibitor
607	84.19	cp	BRD-K03557653	sappanone-a	Tyrosinase inhibitor			Tyrosinase inhibitor, Melanin inhibitor
616	83.97	cp	BRD-U66370498	androstanol	CAR antagonist		NR1I3	CAR antagonist
617	83.97	cp	BRD-K32828673	chelidonine	Tubulin inhibitor			Tubulin inhibitor
620	83.89	cp	BRD-K51816706	oxindole-I	VEGFR inhibitor		AKT1, KDR, PDPK1, RET	VEGFR inhibitor
624	83.84	cp	BRD-A62025033	temsirolimus	MTOR inhibitor		MTOR, PTEN	MTOR inhibitor
625	83.72	cp	BRD-K29905972	axitinib	PDGFR receptor inhibitor		KDR, FLT1, FLT4, CSF1, CYP2C19, CYP3A5, KIT, PDGFRB, PLK4	PDGFR receptor inhibitor, VEGFR inhibitor
632	83.49	cp	BRD-K89162000	tandutinib	FLT3 inhibitor		FLT3, KIT, PDGFRA, PDGFRB, CSF1R, PDGFD	FLT3 inhibitor, KIT inhibitor, PDGFR receptor inhibitor
633	83.49	cp	BRD-K69328504	L-690488	Inositol monophosphatase inhibitor		IMPA1	Inositol monophosphatase inhibitor
641	83.07	cp	BRD-K57011718	UK-356618	Metalloproteinase inhibitor		MMP3, MMP13, MMP14, MMP2, MMP9	Metalloproteinase inhibitor
652	82.45	cp	BRD-A54236247	racephedrine	Adrenergic receptor agonist			Adrenergic receptor agonist
656	82.26	cp	BRD-A84189516	baccatin-III	Paclitaxel precursor			Paclitaxel precursor
663	82.07	cp	BRD-K14791739	fluticasone	Glucocorticoid receptor agonist		NR3C1, CYP3A5, CYP3A7, NR3C2, PGR, PLA2G4A	Glucocorticoid receptor agonist
664	82.06	cp	BRD-A89337244	PD-102807	Acetylcholine receptor antagonist		CHRM4	Acetylcholine receptor antagonist
667	81.95	cp	BRD-K22631935	neurodazine	Neurogenesis of non-pluripotent C2C12 myoblast inducer			Neurogenesis of non-pluripotent C2C12 myoblast inducer
672	81.67	cp	BRD-K82823804	SA-792987	PKC inhibitor		WEE1	PKC inhibitor
673	81.66	cp	BRD-K17743697	KB-R7943	Sodium/calcium exchange inhibitor		SLC8A1, TRPC3, TRPC5, TRPC6	Sodium/calcium exchange inhibitor
677	81.59	cp	BRD-K60219430	serdemetan	MDM inhibitor		MDM2	MDM inhibitor
679	81.55	cp	BRD-K35498378	alrestatin	Aldose reductase inhibitor		AKR1B1	Aldose reductase inhibitor
680	81.53	cp	BRD-K60923938	veratridine	Sodium channel activator		SCN1A, SCN3A, SCN8A, SCN9A	Sodium channel activator
681	81.53	cp	BRD-K74305673	IKK-2-inhibitor-V	IKK inhibitor		IKBKB	IKK inhibitor, NFkB pathway inhibitor
683	81.42	cp	BRD-K14550461	doxercalciferol	Vitamin D receptor agonist		VDR	Vitamin D receptor agonist
685	81.36	cp	BRD-K66093087	FGIN-1-43	Benzodiazepine receptor agonist		TSPO	Benzodiazepine receptor agonist
689	81.25	cp	BRD-K40530731	hyoscyamine	Acetylcholine receptor antagonist		CHRM1, CHRM2, CHRM3, CHRM4	Acetylcholine receptor antagonist
692	81.14	cp	BRD-K24681473	YM-155	Survivin inhibitor		BIRC5	Survivin inhibitor
693	81.12	cp	BRD-K53665955	MK-5108	Aurora kinase inhibitor		AURKA, AURKB, AURKC	Aurora kinase inhibitor
696	81.02	cp	BRD-A31801025	formestane	Aromatase inhibitor		CYP19A1	Aromatase inhibitor
697	81.01	cp	BRD-K32412559	morphothebaine	Adrenergic receptor antagonist			Adrenergic receptor antagonist
698	80.99	cp	BRD-A74771556	nikkomycin	Chitin inhibitor			Chitin inhibitor
700	80.89	cp	BRD-K50311478	tosyl-phenylalanyl-chloromethyl-ketone	Chymotrypsin inhibitor			Chymotrypsin inhibitor
701	80.86	cp	BRD-A72711497	lasalocid	Bacterial permeability inducer			Bacterial permeability inducer
702	80.84	cp	BRD-K90333595	phentolamine	Adrenergic receptor antagonist		ADRA1A, ADRA2A, ADRA1B, ADRA1D, ADRA2B, ADRA2C	Adrenergic receptor antagonist
712	80.35	cp	BRD-A78360835	cercosporin	Photoactivated toxin			Photoactivated toxin
719	80.11	cp	BRD-K31699485	DMEOB	glutamate receptor modulator			glutamate receptor modulator
722	79.97	cp	BRD-K60640630	mometasone	Glucocorticoid receptor agonist		NR3C1	Glucocorticoid receptor agonist, Immunosuppressant
723	79.91	cp	BRD-K62353524	DY-131	Estrogen receptor agonist		ESR2, ESRRB, ESRRG	Estrogen receptor agonist
735	79.52	cp	BRD-K82846253	repaglinide	Insulin secretagogue		ABCC8, CYP2C8, CYP3A5, INS, KCNJ11, PPARG	Insulin secretagogue
737	79.49	cp	BRD-K40175214	torin-1	MTOR inhibitor		MTOR, PIK3CA	MTOR inhibitor, PI3K inhibitor
738	79.46	cp	BRD-K98521173	desoxycortone	Mineralocorticoid receptor agonist		NR3C1, NR3C2	Mineralocorticoid receptor agonist
739	79.45	cp	BRD-K65503129	HSP90-inhibitor	HSP inhibitor		HSP90AA1, HSP90AB1	HSP inhibitor
742	79.41	cp	BRD-K72895815	SSR-69071	Leukocyte elastase inhibitor		ELANE	Leukocyte elastase inhibitor
748	79.11	cp	BRD-K64517075	heliomycin	ATP synthase inhibitor			ATP synthase inhibitor
752	78.96	cp	BRD-K63630713	etacrynic-acid	Sodium/potassium/chloride transporter inhibitor		SLC12A1, ATP1A1, SLC12A2	Sodium/potassium/chloride transporter inhibitor
761	78.59	cp	BRD-A71765365	mepireserpate	Catecholamine depleting sympatholytic		SLC18A2, SLC18A1	Catecholamine depleting sympatholytic
764	78.34	cp	BRD-K92000912	AM-251	Cannabinoid receptor antagonist		CNR1, GPR18, GPR55	Cannabinoid receptor antagonist
785	77.32	cp	BRD-K64935403	ebelactone-b	Lipase inhibitor		PNLIP	Lipase inhibitor
790	77.27	cp	BRD-A18620900	estriol	Estrogen receptor agonist		ESR1, ESR2	Estrogen receptor agonist
795	76.95	cp	BRD-K28168037	fenretinide	Apoptosis stimulant		CYP2C8, CYP3A5, RARA, RARG	Apoptosis stimulant, Retinoid receptor agonist
796	76.89	cp	BRD-A10969569	ambelline	Plant alkaloid			Plant alkaloid
797	76.85	cp	BRD-K28667793	pyrazinamide	Fatty acid synthase inhibitor		FASN	Fatty acid synthase inhibitor
800	76.68	cp	BRD-A70407468	PSB-36	Adenosine receptor antagonist		ADORA1, ADORA2A, ADORA2B, ADORA3	Adenosine receptor antagonist
803	76.55	cp	BRD-K68997413	PF-3845	FAAH inhibitor		FAAH	FAAH inhibitor
804	76.52	cp	BRD-K11558771	droxinostat	HDAC inhibitor		HDAC6, HDAC8	HDAC inhibitor
810	76.39	cp	BRD-K03319035	maprotiline	Norepinephrine reuptake inhibitor		SLC6A2, ADRA1A, ADRA1B, ADRA1D, ADRA2A, ADRA2B, ADRA2C, CHRM1, CHRM2, CHRM3, CHRM4, CHRM5, DRD2, HRH1, HTR2A, HTR2C, HTR7	Norepinephrine reuptake inhibitor, Tricyclic antidepressant
819	76.25	cp	BRD-A42553870	L-152804	Neuropeptide receptor antagonist		NPY5R	Neuropeptide receptor antagonist
822	76.09	cp	BRD-U44700465	HG-5-88-01	Protein kinase inhibitor		ADCK4, EGFR	Protein kinase inhibitor
824	75.98	cp	BRD-K35960502	niclosamide	DNA replication inhibitor		STAT3	DNA replication inhibitor, STAT inhibitor
830	75.74	cp	BRD-K27184429	levocetirizine	Histamine receptor antagonist		HRH1, CXCL8	Histamine receptor antagonist
836	75.6	cp	BRD-A15493168	tetracycline	Bacterial 30S ribosomal subunit inhibitor		PRNP	Bacterial 30S ribosomal subunit inhibitor
843	75.34	cp	BRD-K13211965	L-741742	Dopamine receptor antagonist		DRD4, DRD3, SCN1A, SCN3A	Dopamine receptor antagonist
845	75.29	cp	BRD-A74667430	etodolac	Cyclooxygenase inhibitor		PTGS2, PTGS1, RXRA, TRPV1	Cyclooxygenase inhibitor
849	75.1	cp	BRD-A21723284	naltriben	Opioid receptor antagonist		OPRD1, OPRK1, OPRM1	Opioid receptor antagonist
858	74.85	cp	BRD-A30435184	metergoline	Dopamine receptor agonist		DRD2, HTR1A, HTR1B, HTR1D, HTR1E, HTR1F, HTR2A, HTR2B, HTR2C, HTR5A, HTR6, HTR7	Dopamine receptor agonist, Serotonin receptor antagonist
861	74.74	cp	BRD-K73109821	diazoxide	Potassium channel activator		ATP1A1, CA1, CA2, KCNJ11, KCNMA1, SLC12A3	Potassium channel activator
864	74.61	cp	BRD-A43331270	niguldipine	Calcium channel blocker		ADRA1A, CACNA1C, ADRA1B, ADRA1D	Calcium channel blocker, Adrenergic receptor antagonist
865	74.56	cp	BRD-K06753942	nobiletin	MEK inhibitor		ABCB1, MAP2K1, TYR	MEK inhibitor
870	74.47	cp	BRD-A22769835	homochlorcyclizine	Antihistamine		HRH1	Antihistamine
874	74.39	cp	BRD-K00627859	tubastatin-a	HDAC inhibitor		HDAC6	HDAC inhibitor
878	74.3	cp	BRD-K81783531	VX-222	HCV inhibitor			HCV inhibitor
879	74.28	cp	BRD-K08273968	griseofulvin	Tubulin inhibitor		KRT12	Tubulin inhibitor
880	74.22	cp	BRD-K39120595	bithionol	Autotaxin inhibitor		ESR1, ESR2, MCL1	Autotaxin inhibitor
881	74.15	cp	BRD-K45542189	diethylcarbamazine	Lipoxygenase inhibitor		ALOX5, PTGS1	Lipoxygenase inhibitor
883	74.05	cp	BRD-K72264770	QW-BI-011	Histone lysine methyltransferase inhibitor		EHMT2	Histone lysine methyltransferase inhibitor
886	73.82	cp	BRD-A93236127	digitoxin	ATPase inhibitor		ATP1A1	ATPase inhibitor
889	73.63	cp	BRD-K12002134	megestrol	progesterone receptor agonist		PGR	progesterone receptor agonist
891	73.59	cp	BRD-A67748489	K3644	Kinesin-like spindle protein inhibitor		KIF11	Kinesin-like spindle protein inhibitor
895	73.48	cp	BRD-K05181463	L-741626	Dopamine receptor antagonist		DRD2, DRD3, DRD4, HTR2A, HTR2B	Dopamine receptor antagonist
904	73.29	cp	BRD-K17378184	prestwick-559	Dopamine receptor agonist		DRD3, ADRA1A, ADRA1D, ADRA2A, DRD1, DRD2, DRD4, HTR1A, HTR2B	Dopamine receptor agonist
910	73.09	cp	BRD-A98702003	carbenoxolone	11-beta-HSD1 inhibitor		HSD11B1, GJA1, GJA10, GJA3, GJA4, GJA5, GJA8, GJA9, GJB1, GJB2, GJB3, GJB4, GJB5, GJB6, GJB7, GJC1, GJC2, GJC3, GJD2, GJD3, GJD4, GJE1, PANX1, PANX2, PANX3	11-beta-HSD1 inhibitor
911	73.07	cp	BRD-K36395411	SB-206553	Serotonin receptor antagonist		HTR2B, HTR2C, HTR1A, HTR2A	Serotonin receptor antagonist
919	72.72	cp	BRD-K18518344	digitoxigenin	ATPase inhibitor		ATP1A1	ATPase inhibitor
922	72.44	cp	BRD-A15435692	BMY-14802	Sigma receptor antagonist		HTR1A, SIGMAR1	Sigma receptor antagonist
926	72.37	cp	BRD-A04756508	norgestimate	Progesterone receptor agonist		PGR, ESR1	Progesterone receptor agonist
928	72.26	cp	BRD-A29260609	acebutolol	Adrenergic receptor antagonist		ADRB1, ADRB2	Adrenergic receptor antagonist
934	72.1	cp	BRD-K76775527	nimesulide	Cyclooxygenase inhibitor		PTGS2, LTF, PLA2G2E, PTGS1	Cyclooxygenase inhibitor
938	71.94	cp	BRD-K19295594	gossypol	BCL inhibitor		BCL2, BCL2L1, MCL1, BCL2L2, CTGF, EGF	BCL inhibitor, MCL1 inhibitor
939	71.92	cp	BRD-K17674993	diflorasone	Corticosteroid agonist		NR3C1, PLA2G1B	Corticosteroid agonist, Glucocorticoid receptor agonist, Cytochrome P450 inhibitor, Immunosuppressant
940	71.87	cp	BRD-K56614220	clofazimine	GK0582 inhibitor			GK0582 inhibitor
942	71.81	cp	BRD-K72816382	cinalukast	Leukotriene receptor antagonist		CYSLTR1	Leukotriene receptor antagonist
947	71.68	cp	BRD-K13566078	BMS-345541	IKK inhibitor		IKBKB, CHUK	IKK inhibitor
949	71.61	cp	BRD-K31238592	devazepide	CCK receptor antagonist		CCKAR, CCKBR, GAST	CCK receptor antagonist
952	71.49	cp	BRD-K43860855	iobenguane	Antineoplastic			Antineoplastic
953	71.44	cp	BRD-K64881305	ispinesib	Kinesin-like spindle protein inhibitor		KIF11	Kinesin-like spindle protein inhibitor
954	71.28	cp	BRD-K83837640	JNJ-26854165	HDAC inhibitor		HDAC1, HDAC10, HDAC11, HDAC2, HDAC3, HDAC4, HDAC5, HDAC6, HDAC7, HDAC8, HDAC9, MDM2	HDAC inhibitor
955	71.17	cp	BRD-K92138166	mammea-a	other antibiotic			other antibiotic
965	70.74	cp	BRD-A95939040	sertaconazole	Sterol demethylase inhibitor			Sterol demethylase inhibitor
966	70.65	cp	BRD-A43150328	penicillic-acid	other antibiotic			other antibiotic
967	70.65	cp	BRD-A72758037	asiatic-acid	Apoptosis stimulant		PYGM	Apoptosis stimulant
968	70.64	cp	BRD-K59184148	SB-216763	Glycogen synthase kinase inhibitor		GSK3B, CCNA2, CDK2, GSK3A	Glycogen synthase kinase inhibitor
970	70.54	cp	BRD-A33168282	sotalol	Adrenergic receptor antagonist		ADRB1, ADRB2, KCNH2	Adrenergic receptor antagonist
975	70.45	cp	BRD-A62890442	3-methyl-GABA	GABA aminotransferase activator			GABA aminotransferase activator
976	70.43	cp	BRD-A60245366	AS-601245	JNK inhibitor		GSK3B, MAPK10, MAPK8, MAPK9, PIM1	JNK inhibitor
977	70.35	cp	BRD-K39944607	ochratoxin-a	Phenylalanyl tRNA synthetase inhibitor		SLC22A6	Phenylalanyl tRNA synthetase inhibitor
984	70.29	cp	BRD-K55301415	abiraterone	17,20 lyase inhibitor		CYP17A1, CYP11B1	17,20 lyase inhibitor, Androgen biosynthesis inhibitor, Cytochrome P450 inhibitor, Steroid sulfatase inhibitor
985	70.29	cp	BRD-K76205745	losartan	Angiotensin receptor antagonist		AGTR1	Angiotensin receptor antagonist
987	70.18	cp	BRD-K63089472	farnesylthioacetic-acid	Inhibitor of methyl esterification of farnesylated proteins			Inhibitor of methyl esterification of farnesylated proteins
989	70.13	cp	BRD-K52512893	SC-19220	Prostanoid receptor antagonist		PTGER1	Prostanoid receptor antagonist
992	69.92	cp	BRD-K76907295	VU-0418947-2	HIF modulator			HIF modulator
994	69.88	cp	BRD-A82590476	SDZ-NKT-343	Tachykinin antagonist		TACR1	Tachykinin antagonist
998	69.8	cp	BRD-K07265709	razoxane	Chelating agent		TOP2A, TOP2B	Chelating agent, Topoisomerase inhibitor
1000	69.78	cp	BRD-K75295174	alisertib	Aurora kinase inhibitor		AURKA	Aurora kinase inhibitor
1001	69.73	cp	BRD-K61401890	deguelin	NADH-ubiquinone oxidoreductase (Complex I) inhibitor		AKT1, PTGS2	NADH-ubiquinone oxidoreductase (Complex I) inhibitor
1002	69.71	cp	BRD-K84955386	hyperoside	Glucosidase inhibitor		ACE, AKR1B1, GAA	Glucosidase inhibitor
1007	69.55	cp	BRD-K77947974	fluspirilene	Dopamine receptor antagonist		DRD2, HTR2A, CACNG1, HRH1, HTR1A, HTR1D, HTR1E	Dopamine receptor antagonist
1012	69.24	cp	BRD-K90574421	ipsapirone	Serotonin receptor agonist		HTR1A	Serotonin receptor agonist
1020	68.86	cp	BRD-K42748308	XE-991	Potassium channel blocker		KCNQ1, KCNQ2, KCNQ3, KCNQ4, KCNQ5	Potassium channel blocker
1024	68.78	cp	BRD-K50866992	tropisetron	Serotonin receptor antagonist		HTR3A, GLRA1, GLRA2, GLRB, HTR4	Serotonin receptor antagonist
1031	68.56	cp	BRD-A68631409	evodiamine	ATPase inhibitor		TRPV1	ATPase inhibitor, TRPV agonist
1035	68.37	cp	BRD-K36638830	anabasine	Acetylcholine receptor agonist			Acetylcholine receptor agonist
1036	68.31	cp	BRD-K97061094	azacyclonol	Histamine receptor antagonist		HRH1	Histamine receptor antagonist
1039	68.16	cp	BRD-K13390322	AT-7519	CDK inhibitor		CDK2, CDK5, CDK1, CDK4, CDK6, CDK9	CDK inhibitor, Cell cycle inhibitor
1040	68.1	cp	BRD-K31792052	pifithrin	Interleukin receptor antagonist			Interleukin receptor antagonist
1041	68.06	cp	BRD-K29359156	ebselen	H+/K+-ATPase inhibitor		ALB, LTB4R, NOX3	H+/K+-ATPase inhibitor, Cyclooxygenase inhibitor, Glutathione peroxidase agonist, Nitric oxide synthase inhibitor
1045	67.95	cp	BRD-K96778649	tyrphostin-47	EGFR inhibitor		EGFR	EGFR inhibitor
1046	67.88	cp	BRD-A73605923	mocimycin	Protein synthesis inhibitor			Protein synthesis inhibitor
1053	67.39	cp	BRD-A94756469	digoxin	ATPase inhibitor		ATP1A1, ABCB1, RORC, SLCO1B3	ATPase inhibitor
1056	67.32	cp	BRD-K20755323	SA-792728	Sphingosine kinase inhibitor		SPHK1, VCP	Sphingosine kinase inhibitor
1058	67.25	cp	BRD-K47328134	lysylphenylalanyl-tyrosine	Heparin activation inhibitor			Heparin activation inhibitor
1067	66.79	cp	BRD-K29673530	hypericin	Tyrosine kinase inhibitor			Tyrosine kinase inhibitor
1069	66.72	cp	BRD-A57382968	piroxicam	Cyclooxygenase inhibitor		PTGS2, PTGS1	Cyclooxygenase inhibitor
1070	66.71	cp	BRD-K13356952	methazolamide	Carbonic anhydrase inhibitor		CA1, CA2, CA4, CA7, CA12, CA14, INS	Carbonic anhydrase inhibitor
1071	66.7	cp	BRD-A48257147	PHCCC	Glutamate receptor agonist		GRM1, GRM4	Glutamate receptor agonist
1073	66.64	cp	BRD-K85015012	NNC-05-2090	GAT inhibitor		SLC6A11, SLC6A12, SLC6A13	GAT inhibitor, GABA uptake inhibitor
1075	66.6	cp	BRD-K03109492	NSC-663284	CDC inhibitor		CDC25A, CDC25B, CDC25C	CDC inhibitor
1078	66.44	cp	BRD-A36707673	hydroxycholesterol	LXR agonist		ABCA1, NR1H2, NR1H3	LXR agonist
1079	66.41	cp	BRD-K33882852	ZK-93423	Benzodiazepine receptor agonist		GABRA1, GABRA2, GABRA3, GABRA5, GABRB2, GABRG2	Benzodiazepine receptor agonist
1082	66.34	cp	BRD-K99545815	PF-562271	Focal adhesion kinase inhibitor		PTK2, PTK2B	Focal adhesion kinase inhibitor
1083	66.28	cp	BRD-K14200658	syrosingopine	Vesicular monoamine transporter inhibitor		SLC18A2, SLC18A1	Vesicular monoamine transporter inhibitor
1088	66.09	cp	BRD-K40213712	SAL-1	Adenosine receptor antagonist		ADORA2B, ADORA2A	Adenosine receptor antagonist
1089	66.09	cp	BRD-K40990712	hexamethyleneamiloride	Sodium/hydrogen antiport inhibitor		GNRHR, ADRA2A, GNRH1, PLAU, SLC9A1	Sodium/hydrogen antiport inhibitor
1100	65.74	cp	BRD-A92439610	triamcinolone	Glucocorticoid receptor agonist		NR3C1, CYP3A5, CYP3A7, SERPINA6	Glucocorticoid receptor agonist
1107	65.38	cp	BRD-A69636825	diltiazem	Calcium channel blocker		CACNA1C, CACNA1S, CACNA2D1, CACNG1, CYP3A5, CYP3A7, HTR3A, KCNA5	Calcium channel blocker
1111	65.28	cp	BRD-K72029282	probucol	Atherogenesis inhibitor		ABCA1, ABCB11, CES1	Atherogenesis inhibitor
1112	65.26	cp	BRD-A12016240	LY-278584	Serotonin receptor antagonist		HTR3A	Serotonin receptor antagonist
1113	65.24	cp	BRD-K33483813	actarit	Interleukin receptor agonist			Interleukin receptor agonist
1118	65.02	cp	BRD-K32536677	AGK-2	SIRT inhibitor		SIRT2	SIRT inhibitor
1121	64.94	cp	BRD-K59851896	calycanthine	GABA release inhibitor			GABA release inhibitor
1122	64.9	cp	BRD-K61217870	n-(3-acetamidophenyl)-3-chlorobenzamide	Glutamate receptor antagonist		GRM5	Glutamate receptor antagonist
1124	64.88	cp	BRD-A11135865	nor-binaltorphimine	Opioid receptor antagonist			Opioid receptor antagonist
1125	64.79	cp	BRD-K94919853	10H-phenothiazin-10-yl)(p-tolyl)methanone	Butyrylcholinesterase inhibitor		BCHE	Butyrylcholinesterase inhibitor
1127	64.7	cp	BRD-K88701661	dimercaptosuccinic-acid	Chelating agent		DNMT1	Chelating agent
1130	64.63	cp	BRD-K17415526	tyrphostin-AG-835	Protein tyrosine kinase inhibitor		EGFR	Protein tyrosine kinase inhibitor
1131	64.62	cp	BRD-K15402119	huperzine-a	Acetylcholinesterase inhibitor		ACHE	Acetylcholinesterase inhibitor
1139	64.3	cp	BRD-K97810537	beclometasone	Glucocorticoid receptor agonist		NR3C1, CYP3A5, GPR97, SERPINA6	Glucocorticoid receptor agonist, Immunosuppressant
1142	64.2	cp	BRD-K68191783	ALW-II-38-3	Ephrin inhibitor		DDR1, EPHA2, EPHA4, EPHB2, EPHB4, EPHB6	Ephrin inhibitor
1144	64.02	cp	BRD-K99411983	lumicolchicine	Colchicine isomer, non-binder of microtubules			Colchicine isomer, non-binder of microtubules
1146	63.9	cp	BRD-K05151076	ZK-164015	Estrogen receptor antagonist		ESR1, ESR2	Estrogen receptor antagonist
1149	63.78	cp	BRD-K35458079	edaravone	Nootropic agent		BCL2	Nootropic agent
1151	63.72	cp	BRD-K35573744	erbstatin-analog	EGFR inhibitor		EGFR	EGFR inhibitor
1155	63.68	cp	BRD-K10065684	dantron	Laxative			Laxative
1156	63.66	cp	BRD-K93258693	GW-9662	PPAR receptor antagonist		PPARG, NCOA2, RXRA	PPAR receptor antagonist
1159	63.55	cp	BRD-A98299281	velnacrine	cholinesterase inhibitor		ACHE	cholinesterase inhibitor
1162	63.25	cp	BRD-A80960055	celastrol	Anti-inflammatory		IL1B, TNF	Anti-inflammatory, Antioxidant, NFkB pathway inhibitor, HSP inhibitor, Topoisomerase inhibitor
1164	63.13	cp	BRD-U01690642	acetyl-geranyl-cysteine	Isoprenylated protein methylation inhibitor			Isoprenylated protein methylation inhibitor
1168	63.05	cp	BRD-A79465854	auranofin	NFkB pathway inhibitor		IKBKB, PRDX5, TRPA1, TXNRD1, TXNRD2	NFkB pathway inhibitor
1181	62.7	cp	BRD-K73319509	PF-04217903	c-Met inhibitor		MET	c-Met inhibitor
1182	62.69	cp	BRD-A62525898	prednisone	Glucocorticoid receptor agonist		NR3C1, HSD11B1	Glucocorticoid receptor agonist
1187	62.5	cp	BRD-K20655524	mefexamide	Psychoactive drug			Psychoactive drug
1189	62.42	cp	BRD-K72726508	arcyriaflavin-a	CDK inhibitor		CCND1, CCNE1, CDK2, CDK4	CDK inhibitor
1192	62.34	cp	BRD-A08003242	rhodomyrtoxin-b	sodium fluorescein uptake inhibitor			sodium fluorescein uptake inhibitor
1196	62.12	cp	BRD-K19111024	clofibric-acid	PPAR receptor agonist		PPARA	PPAR receptor agonist
1198	62.06	cp	BRD-K03816923	rottlerin	MAP kinase inhibitor		KCNH2, PRKCD, TGM2	MAP kinase inhibitor, Protein kinase inhibitor
1200	61.98	cp	BRD-K19796430	erismodegib	Smoothened receptor antagonist		SMO	Smoothened receptor antagonist
1204	61.84	cp	BRD-A38913120	BH3I-1	BCL inhibitor		BCL2	BCL inhibitor
1206	61.75	cp	BRD-K63641886	cefuroxime	Bacterial cell wall synthesis inhibitor			Bacterial cell wall synthesis inhibitor
1207	61.74	cp	BRD-K63784565	BRD-K63784565	Topoisomerase inhibitor		TOP1	Topoisomerase inhibitor
1210	61.67	cp	BRD-K37516142	idebenone	Calcium channel modulator			Calcium channel modulator
1212	61.65	cp	BRD-A15010982	HU-211	Glutamate receptor antagonist		CNR1, CNR2, GLRA1, GLRA2, GLRA3, GPR55, GRIN1, NFKB1	Glutamate receptor antagonist
1213	61.65	cp	BRD-K75615183	talipexole	Adrenergic receptor agonist		DRD2, HTR3A	Adrenergic receptor agonist, Dopamine receptor agonist
1214	61.63	cp	BRD-K15616905	CCCP	Mitochondrial oxidative phosphorylation uncoupler			Mitochondrial oxidative phosphorylation uncoupler
1216	61.6	cp	BRD-K69837166	trap-101	Nociceptin/orphanin FQ (NOP) receptor antagonist		OPRL1	Nociceptin/orphanin FQ (NOP) receptor antagonist, Opioid receptor antagonist
1218	61.53	cp	BRD-K08703257	3-amino-benzamide	PARP inhibitor		PARP1	PARP inhibitor
1220	61.5	cp	BRD-K46212057	voriconazole	Cytochrome P450 inhibitor		CYP2C19, CYP51A1	Cytochrome P450 inhibitor
1221	61.49	cp	BRD-K34995470	SU-1498	VEGFR inhibitor		ERBB2, KDR	VEGFR inhibitor
1222	61.45	cp	BRD-A17819071	gedunin	HSP inhibitor		HSP90AA1	HSP inhibitor
1237	60.78	cp	BRD-K28806945	L-750667	Dopamine receptor antagonist		DRD4	Dopamine receptor antagonist
1242	60.71	cp	BRD-K64514229	toltrazuril	Antiprotozoal			Antiprotozoal
1243	60.6	cp	BRD-K73395020	SA-1478088	-666		MMP12, MMP14, MMP2, MMP8, MMP9	-666
1272	59.33	cp	BRD-K51941867	LM-1685	Cyclooxygenase inhibitor		PTGS2	Cyclooxygenase inhibitor
1276	59.18	cp	BRD-K61737877	VEGF-receptor-2-kinase-inhibitor-IV	VEGFR inhibitor		KDR	VEGFR inhibitor
1281	58.95	cp	BRD-K77998258	ganglioside	SRC activator			SRC activator
1282	58.84	cp	BRD-A56012032	thiorphan	Membrane metalloendopeptidase inhibitor		MME	Membrane metalloendopeptidase inhibitor
1287	58.62	cp	BRD-K50891186	GR-103691	Dopamine receptor antagonist			Dopamine receptor antagonist
1291	58.41	cp	BRD-K47693913	evoxine	Furoquinoline alkaloid			Furoquinoline alkaloid
1299	57.98	cp	BRD-K92731339	perindopril	ACE inhibitor		ACE	ACE inhibitor
1305	57.79	cp	BRD-K32977963	eugenol	Androgen receptor antagonist		AR, MAOA	Androgen receptor antagonist
1307	57.77	cp	BRD-K80527266	triacsin-c	Adrenergic receptor antagonist		ACSL1	Adrenergic receptor antagonist
1308	57.75	cp	BRD-K36153907	KU-C103885	Cystic fibrosis transmembrane conductance regulator inhibitor			Cystic fibrosis transmembrane conductance regulator inhibitor
1319	57.42	cp	BRD-K68392338	ZK-93426	Benzodiazepine receptor antagonist		GABRA1, GABRA2, GABRA3, GABRA5	Benzodiazepine receptor antagonist
1322	57.25	cp	BRD-K63945320	dihydrosamidin	Phospholipase inhibitor			Phospholipase inhibitor, Nitric oxide production inhibitor, Platelet activating factor receptor antagonist
1323	57.24	cp	BRD-K89626439	sirolimus	MTOR inhibitor		MTOR, FKBP1A, CCR5, FGF2	MTOR inhibitor
1327	57.04	cp	BRD-A28856712	tetryzoline	Adrenergic receptor agonist			Adrenergic receptor agonist
1332	56.93	cp	BRD-K94144010	cotinine	Nicotine metabolite			Nicotine metabolite
1333	56.92	cp	BRD-K54256913	MK-1775	WEE1 kinase inhibitor		WEE1	WEE1 kinase inhibitor
1336	56.87	cp	BRD-K14767410	SC-560	Cyclooxygenase inhibitor		PTGS1	Cyclooxygenase inhibitor
1339	56.8	cp	BRD-K46384212	o-3M3FBS	phospholipase activator			phospholipase activator
1343	56.72	cp	BRD-A07000685	hydrocortisone	Glucocorticoid receptor agonist		ANXA1, NOS2, NR3C1, NR3C2	Glucocorticoid receptor agonist
1354	56.4	cp	BRD-K54411430	robustic-acid	cAMP inhibitor			cAMP inhibitor
1357	56.35	cp	BRD-K49519144	LY-2140023	Glutamate receptor agonist		GRM3, GRM2	Glutamate receptor agonist
1360	56.21	cp	BRD-A54880345	etomidate	GABA receptor modulator		GABRA1, ADRA2B, GABRA2, GABRA3, GABRA4, GABRA5, GABRA6, GABRB1, GABRB2, GABRB3, GABRD, GABRE, GABRG1, GABRG2, GABRG3, GABRP, GABRQ	GABA receptor modulator
1363	56.03	cp	BRD-A15034104	bergenin	Interleukin inhibitor		PTPN1	Interleukin inhibitor
1368	55.92	cp	BRD-K72024482	MRS-1754	Adenosine receptor antagonist		ADORA2B, ADORA1, ADORA2A, ADORA3	Adenosine receptor antagonist
1371	55.79	cp	BRD-K18779551	bifemelane	Acetylcholine release stimulant		SLC6A2	Acetylcholine release stimulant, Adrenergic transmitter uptake inhibitor, Reducing agent
1375	55.68	cp	BRD-K18036262	L-168049	Glucagon receptor antagonist		GCGR	Glucagon receptor antagonist
1377	55.67	cp	BRD-K73824630	skatole	Thrombin inhibitor		F2	Thrombin inhibitor
1380	55.4	cp	BRD-A42831637	tetrahydrocannabinol-7-oic-acid	Anti-inflammatory			Anti-inflammatory, Cannabinoid metabolite
1381	55.34	cp	BRD-K03384561	roquinimex	Angiogenesis inhibitor			Angiogenesis inhibitor, TNF production inhibitor
1391	54.83	cp	BRD-K12516989	zaprinast	Phosphodiesterase inhibitor		PDE5A, GPR35, PDE1A, PDE4D, PDE9A	Phosphodiesterase inhibitor
1392	54.82	cp	BRD-A01295252	trans-7-hydroxy-pipat	Dopamine receptor ligand			Dopamine receptor ligand
1393	54.78	cp	BRD-A03359064	ICI-89406	Adrenergic receptor antagonist		ADRB1, ADRB2	Adrenergic receptor antagonist
1396	54.73	cp	BRD-A20968261	WAY-213613	Glutamate inhibitor		SLC1A2	Glutamate inhibitor
1400	54.52	cp	BRD-K75958195	pizotifen	Serotonin receptor antagonist		HTR2A, HTR1A, HTR2C	Serotonin receptor antagonist
1408	54.23	cp	BRD-K77133231	PD-169316	p38 MAPK inhibitor		ALOX5	p38 MAPK inhibitor
1418	53.58	cp	BRD-K27351809	nomegestrol	Progesterone receptor agonist		PGR	Progesterone receptor agonist
1421	53.46	cp	BRD-A37492983	iocetamic-acid	Radiopaque medium			Radiopaque medium
1426	53.29	cp	BRD-K62965247	tipifarnib-P2	farnesyltransferase inhibitor		FNTA, FNTB	farnesyltransferase inhibitor
1429	53.15	cp	BRD-A50157456	terbutaline	Adrenergic receptor agonist		ADRB2	Adrenergic receptor agonist
1436	52.75	cp	BRD-M40783228	mesna	Antioxidant			Antioxidant
1437	52.73	cp	BRD-K68103045	CGS-20625	Benzodiazepine receptor agonist		GABRA1, GABRA2, GABRA3, GABRA5	Benzodiazepine receptor agonist, GABA benzodiazepine site receptor partial agonist
1438	52.69	cp	BRD-K40619305	larixinic-acid	Compound that interacts with metal centers			Compound that interacts with metal centers
1439	52.68	cp	BRD-K11911061	GR-127935	Serotonin receptor antagonist		HTR1B, HTR1D, HTR1A, HTR2A, HTR2C, HTR1E, HTR1F, HTR2B, HTR6	Serotonin receptor antagonist
1444	52.58	cp	BRD-K60184833	tyrphostin-46	Tyrosine kinase inhibitor		EGFR	Tyrosine kinase inhibitor
1449	52.4	cp	BRD-A23072235	pheniramine	Histamine receptor antagonist		HRH1	Histamine receptor antagonist
1452	52.34	cp	BRD-K77793136	hydroxyfasudil	Rho associated kinase inhibitor		ROCK1, PKIA, PRKACA, ROCK2	Rho associated kinase inhibitor
1455	52.2	cp	BRD-K51302260	KU-C103871	GSP agonist		SMAD3	GSP agonist
1461	51.88	cp	BRD-K97509413	coumestrol	Estrogen receptor agonist		ESR1, ESR2	Estrogen receptor agonist
1462	51.65	cp	BRD-K92492521	LY-255283	Leukotriene receptor antagonist		LTB4R, LTB4R2	Leukotriene receptor antagonist
1465	51.58	cp	BRD-K92984783	melperone	Serotonin receptor antagonist		DRD2, HTR1A, HTR2A	Serotonin receptor antagonist, Dopamine receptor antagonist
1467	51.52	cp	BRD-A96107863	nisoldipine	Calcium channel blocker		CACNA1C, CACNA1D, CACNA1S, CACNA2D1, CACNB2, CYP3A5	Calcium channel blocker
1480	51.17	cp	BRD-K11158509	tyrphostin-B44	EGFR inhibitor			EGFR inhibitor
1481	51.08	cp	BRD-K19227686	phenolphthalein	Indicator dye			Indicator dye
1488	50.83	cp	BRD-K85606544	neratinib	EGFR inhibitor		EGFR, ERBB2, ERBB4, KDR	EGFR inhibitor
1490	50.74	cp	BRD-K42452249	EO-1428	p38 MAPK inhibitor		MAPK11, MAPK14	p38 MAPK inhibitor
1491	50.73	cp	BRD-K50859149	sulfafurazole	Bacterial antifolate			Bacterial antifolate
1493	50.64	cp	BRD-A51382177	fosinopril	ACE inhibitor		ACE, ABCG2	ACE inhibitor
1499	50.3	cp	BRD-K07888107	depudecin	HDAC inhibitor		HDAC1, HDAC2	HDAC inhibitor
1504	50.23	cp	BRD-A75552914	isoxicam	Cyclooxygenase inhibitor		PTGS1, PTGS2	Cyclooxygenase inhibitor
1508	50.18	cp	BRD-K81855038	roxatidine	Histamine receptor antagonist		HRH2	Histamine receptor antagonist
1513	50.06	cp	BRD-K26373640	IKK-2-inhibitor	IKK inhibitor		IKBKB	IKK inhibitor, SYK inhibitor
1517	49.96	cp	BRD-A33447119	oxfendazole	Anthelmintic			Anthelmintic
1519	49.93	cp	BRD-K33818169	GW-3965	LXR agonist		NR1H2, NR1H3, ABCA1	LXR agonist, ABC transporter expression enhancer
1521	49.66	cp	BRD-A02367930	ethinyl-estradiol	DNA directed DNA polymerase stimulant		CYP2C8, ESR1, ESR2, NR1I2	DNA directed DNA polymerase stimulant, Estrogenic component in oral contraceptives, Estrogen receptor agonist
1523	49.64	cp	BRD-A13122391	triptolide	RNA polymerase inhibitor		CYP2C19, RELA	RNA polymerase inhibitor
1525	49.61	cp	BRD-A34817987	itraconazole	Cytochrome P450 inhibitor		CYP3A5, CYP3A7, CYP51A1, KDR	Cytochrome P450 inhibitor
1528	49.49	cp	BRD-K43797669	genistein	Tyrosine kinase inhibitor		CFTR, ESR2, EGFR, ESR1, ESRRA, ESRRB, ESRRG, NCOA1, NCOA2, PPARG, PTK2B, TOP2A, TRPC5	Tyrosine kinase inhibitor
1530	49.42	cp	BRD-K11717138	benzbromarone	Chloride channel blocker		ABCC1, SLC22A12	Chloride channel blocker
1532	49.4	cp	BRD-K78959463	FPL-64176	Calcium channel activator		CACNA1C, CACNA1S	Calcium channel activator
1537	49.25	cp	BRD-K55127134	fluphenazine	Dopamine receptor antagonist		DRD2, DRD1, CALM1, CHRNA7, DRD5, HRH1, HTR2A, HTR6, HTR7	Dopamine receptor antagonist
1539	49.22	cp	BRD-K21667562	AM-404	Cyclooxygenase inhibitor		TRPV1, CNR1, CNR2, FAAH	Cyclooxygenase inhibitor, FAAH inhibitor, TRPV antagonist
1554	48.59	cp	BRD-K17349619	HLI-373	MDM inhibitor		MDM2	MDM inhibitor
1556	48.54	cp	BRD-A68930007	ouabain	ATPase inhibitor		ATP1A1, ATP1A2, ATP1A3, ATP1A4, ATP1B1, ATP1B2, ATP1B3, ATP1B4, FXYD2	ATPase inhibitor
1560	48.44	cp	BRD-K36198571	WAY-170523	Metalloproteinase inhibitor		MMP13	Metalloproteinase inhibitor
1563	48.21	cp	BRD-K06854232	AM-580	Retinoid receptor agonist		RARA	Retinoid receptor agonist
1571	47.99	cp	BRD-A56892734	esomeprazole	ATPase inhibitor		ATP4A, CYP2C19, CYP3A4	ATPase inhibitor
1573	47.84	cp	BRD-K02715688	hydrastine	Tyrosine hydroxylase inhibitor			Tyrosine hydroxylase inhibitor
1574	47.83	cp	BRD-K51313569	palbociclib	CDK inhibitor		CDK4, CDK6, CCND3	CDK inhibitor
1578	47.67	cp	BRD-K65146499	nabumetone	Cyclooxygenase inhibitor		PTGS2, AKR1C3, CYP2B6, CYP2C19, CYP2E1, PTGS1	Cyclooxygenase inhibitor
1581	47.44	cp	BRD-K86595100	chlordiazepoxide	Benzodiazepine receptor agonist		GABRA1, GABRA2, GABRA3, GABRA4, GABRA5, GABRA6, GABRB1, GABRB2, GABRB3, GABRD, GABRE, GABRG1, GABRG2, GABRG3, GABRP, GABRQ	Benzodiazepine receptor agonist
1585	47.28	cp	BRD-K74913225	brinzolamide	Carbonic anhydrase inhibitor		CA2, CA1, CA7, CA12, CA14, CA4, CA5A, CYP2B6, CYP2C8	Carbonic anhydrase inhibitor
1589	47.18	cp	BRD-K86191271	cytosporone-b	NUR77 receptor agonist		NR4A1	NUR77 receptor agonist
1592	47.01	cp	BRD-K94070024	depomedrol	Glucocorticoid receptor agonist			Glucocorticoid receptor agonist
1597	46.73	cp	BRD-A87387433	cefpodoxime	Bacterial cell wall synthesis inhibitor			Bacterial cell wall synthesis inhibitor
1603	46.61	cp	BRD-M16762496	PIK-75	DNA protein kinase inhibitor		PIK3CA, PIK3CB, PIK3CD, PIK3CG, PRKDC	DNA protein kinase inhibitor, PI3K inhibitor
1606	46.52	cp	BRD-K24656285	farnesol	FXR agonist		MAOB, MVK, NR1H4	FXR agonist, Monoamine oxidase inhibitor, NFkB pathway activator, PPAR receptor agonist
1607	46.52	cp	BRD-K63343048	orlistat	Lipase inhibitor		PNLIP, DAGLA, FASN, LIPF, CNR1, DAGLB	Lipase inhibitor
1610	46.45	cp	BRD-A84493640	atovaquone	Mitochondrial electron transport inhibitor		DHODH	Mitochondrial electron transport inhibitor
1619	46.33	cp	BRD-A25067867	benzatropine	Acetylcholine receptor antagonist		CHRM1, HRH1, SLC6A3	Acetylcholine receptor antagonist
1624	46.18	cp	BRD-A26711594	nicardipine	Calcium channel blocker		CACNA1C, ADORA3, ADRA1A, ADRA1B, ADRA1D, CACNA1D, CACNA2D1, CACNB2, CALM1, CHRM1, CHRM2, CHRM3, CHRM4, CHRM5, PDE1A, PDE1B	Calcium channel blocker
1628	46.05	cp	BRD-K00486786	RO-08-2750	NGF binding inhibitor		NGFR, NGF	NGF binding inhibitor
1634	45.97	cp	BRD-A02333338	cyclopamine	Smoothened receptor antagonist		SMO, DHH, IHH, PTCH1	Smoothened receptor antagonist
1635	45.95	cp	BRD-A65671304	candesartan	Angiotensin receptor antagonist		AGTR1, AGTR2	Angiotensin receptor antagonist
1637	45.84	cp	BRD-K03600606	catechin	Beta secretase inhibitor		BACE1, CA1, CA12, CA14, CA2, CA4, CA6, CA9, FASN, PTGS1, SCN5A	Beta secretase inhibitor, Fatty acid synthase inhibitor, LDL antioxidant
1638	45.82	cp	BRD-K93280214	gabazine	GABA receptor antagonist		GABRA1, GABRA2, GABRA3, GABRA4, GABRA5, GABRA6, GABRG2	GABA receptor antagonist
1641	45.78	cp	BRD-K67868012	PI-103	MTOR inhibitor		PIK3CA, PIK3CG, MTOR, PIK3CB, PIK3CD, PRKDC	MTOR inhibitor, PI3K inhibitor
1645	45.62	cp	BRD-K84175871	pseudoephedrine	Adrenergic receptor agonist		ADRA1A, ADRA2A, ADRB1, ADRB2, ATF1, ATF2, ATF3, ATF4, ATF5, ATF6, ATF7, CXCL8, FOS, HRH1, IL2, JDP2, JUN, NFATC1, SLC6A2, SLC6A3, SLC6A4, TNF	Adrenergic receptor agonist
1654	45.24	cp	BRD-K87932577	CDK1-5-inhibitor	CDK inhibitor		CDK1, CDK5, GSK3B	CDK inhibitor, Glycogen synthase kinase inhibitor
1655	45.16	cp	BRD-A15131297	benazepril	ACE inhibitor		ACE	ACE inhibitor
1656	45.16	cp	BRD-K88568253	iproniazid	Monoamine oxidase inhibitor		MAOA, MAOB	Monoamine oxidase inhibitor
1664	44.92	cp	BRD-K79092138	nitrofural	Bacterial DNA inhibitor			Bacterial DNA inhibitor
1666	44.75	cp	BRD-K19360254	ergocornine	Dopamine receptor agonist		DRD2	Dopamine receptor agonist
1669	44.64	cp	BRD-K55991774	BAS-09104376	HIV integrase inhibitor			HIV integrase inhibitor
1671	44.57	cp	BRD-A59303141	quinethazone	Thiazide diuretic		CA1, CA2, SLC12A1, SLC12A2, SLC12A3	Thiazide diuretic
1676	44.28	cp	BRD-A29731977	17-hydroxyprogesterone-caproate	progesterone receptor agonist		CYP1A2, CYP2B6, CYP3A5, PGR	progesterone receptor agonist
1677	44.28	cp	BRD-K04111260	raclopride	Dopamine receptor antagonist		DRD2, DRD3, HTR1A	Dopamine receptor antagonist
1682	44.15	cp	BRD-A22707317	SB-205384	GABA receptor modulator		GABRA3, GABRA5, GABRA6	GABA receptor modulator
1683	44.1	cp	BRD-K20742498	RS-39604	Serotonin receptor antagonist		HTR4	Serotonin receptor antagonist
1688	43.86	cp	BRD-K77641333	naphazoline	Adrenergic receptor agonist		ADRA1A, ADRA2A	Adrenergic receptor agonist
1689	43.68	cp	BRD-K19605405	ZM-241385	Adenosine receptor antagonist		ADORA2A, ADORA2B, ADORA1, ADORA3	Adenosine receptor antagonist
1693	43.62	cp	BRD-A22380646	pantoprazole	ATPase inhibitor		ATP4A, CYP2C19, CYP3A4	ATPase inhibitor
1694	43.6	cp	BRD-K95992530	Cyclo-[Arg-Gly-Asp-D-Phe-Val]	integrin antagonist		ITGAV, ITGB3	integrin antagonist
1695	43.56	cp	BRD-A44448661	pentobarbital	Barbiturate antiepileptic		GABRA1, CHRNA4, CHRNA7, GABRA2, GABRA3, GABRA4, GABRA5, GABRA6, GABRB1, GABRB2, GABRB3, GABRD, GABRE, GABRG1, GABRG2, GABRG3, GABRP, GABRQ, GRIA2, GRIK2, GRIN1, GRIN2A, GRIN2B, GRIN2C, GRIN2D, GRIN3A, GRIN3B	Barbiturate antiepileptic, GABA receptor modulator
1702	43.3	cp	BRD-A87479750	tenidap	Cyclooxygenase inhibitor		ALOX5, KCNJ4, PTGS1	Cyclooxygenase inhibitor
1703	43.29	cp	BRD-A77722753	hydralazine	Vasodilator		AOC3, P4HA1	Vasodilator
1705	43.26	cp	BRD-K47936004	piribedil	Dopamine receptor agonist		DRD2, DRD3, ADRA1A, ADRA2A, ADRA2C, DRD4, HTR1A, HTR2B	Dopamine receptor agonist
1710	43.05	cp	BRD-K24526313	levcromakalim	Potassium channel activator		KCNJ8, ABCC9, KCNJ5	Potassium channel activator
1714	42.99	cp	BRD-A79672927	tropicamide	Acetylcholine receptor antagonist		CHRM3, CHRM4, CHRM1, CHRM2	Acetylcholine receptor antagonist
1720	42.88	cp	BRD-A22844106	tenoxicam	Cyclooxygenase inhibitor		PTGS2, PTGS1	Cyclooxygenase inhibitor
1725	42.72	cp	BRD-K97330509	SRC-kinase-inhibitor-II	SRC inhibitor			SRC inhibitor
1727	42.63	cp	BRD-K33226500	indinavir	HIV protease inhibitor		CYP3A5	HIV protease inhibitor
1729	42.58	cp	BRD-K11129031	gemfibrozil	Lipoprotein lipase activator		PPARA, CYP2C8, LPL, SLCO1B1, SLCO1B3, SLCO2B1	Lipoprotein lipase activator
1730	42.54	cp	BRD-K90733503	cefalexin	Bacterial cell wall synthesis inhibitor			Bacterial cell wall synthesis inhibitor
1731	42.47	cp	BRD-K74761218	WT-171	HDAC inhibitor		HDAC6	HDAC inhibitor
1738	42.3	cp	BRD-K13819402	desoxypeganine	Acetylcholinesterase inhibitor		ACHE, MAOA	Acetylcholinesterase inhibitor, Monoamine oxidase inhibitor
1739	42.28	cp	BRD-K52620403	STO-609	Calmodulin antagonist		CAMKK1, CAMKK2	Calmodulin antagonist
1740	42.27	cp	BRD-K08640512	RS-100329	Adrenergic receptor antagonist		ADRA1A, ADRA1D	Adrenergic receptor antagonist
1742	42.15	cp	BRD-K57930253	nitrazepam	Benzodiazepine receptor agonist		GABRA1, GABRA2, GABRA3, GABRA4, GABRA5, GABRA6, GABRB1, GABRB2, GABRB3, GABRD, GABRE, GABRG1, GABRG2, GABRG3, GABRP, GABRQ, GABRR1, GABRR2, GABRR3, SCN1A	Benzodiazepine receptor agonist
1753	41.71	cp	BRD-K73290745	ICI-199441	Opioid receptor agonist		OPRK1, CYP2D6, OPRD1, OPRM1, UTS2R	Opioid receptor agonist
1754	41.7	cp	BRD-K13664374	dichloroacetic-acid	Pyruvate dehydrogenase kinase inhibitor		PDK1	Pyruvate dehydrogenase kinase inhibitor
1758	41.67	cp	BRD-K74133369	oligomycin-a	ATP synthase inhibitor		ATP5A1	ATP synthase inhibitor, ATPase inhibitor
1767	41.49	cp	BRD-K01292756	pimozide	Dopamine receptor antagonist		DRD2, DRD3, CACNA1I, CALM1, HRH1, HTR1A, HTR2A, KCNA10, KCNH2	Dopamine receptor antagonist
1771	41.37	cp	BRD-K58772419	AZD-6482	PI3K inhibitor		PIK3CD, PIK3CG, PIK3CA, PIK3CB	PI3K inhibitor
1772	41.33	cp	BRD-K94270326	ecopipam	Dopamine receptor antagonist		DRD1, DRD5, DRD2	Dopamine receptor antagonist
1788	40.76	cp	BRD-A32949107	MRS-1845	Calcium channel blocker		ORAI1	Calcium channel blocker
1789	40.59	cp	BRD-K68873215	phosphodiesterase-V-inhibitor-II	Phosphodiesterase inhibitor		PDE5A	Phosphodiesterase inhibitor
1790	40.54	cp	BRD-K05977823	tenovins	SIRT inhibitor		SIRT1, SIRT2	SIRT inhibitor, TP53 activator
1791	40.44	cp	BRD-A28318179	aminomethyltransferase	Nitric oxide synthase inhibitor		NOS2	Nitric oxide synthase inhibitor
1793	40.33	cp	BRD-K32830106	guanfacine	Adrenergic receptor agonist		ADRA2A, ADRA2B, ADRA2C, CYP3A5, HCN1, HCN2, HCN3, HCN4	Adrenergic receptor agonist
1795	40.28	cp	BRD-A39255369	DCPIB	Chloride channel blocker		SLC1A2	Chloride channel blocker, Gap junction modulator, Glutamate inhibitor
1797	40.24	cp	BRD-A94413429	NTNCB	Neuropeptide receptor antagonist		NPY5R	Neuropeptide receptor antagonist
1798	40.18	cp	BRD-K71799949	carbamazepine	Carboxamide antiepileptic		ABCB1, CYP1A2, CYP3A4, SCN1A, SCN3A, SCN5A	Carboxamide antiepileptic
1800	40.11	cp	BRD-A77349281	RK-682	Tyrosine phosphatase inhibitor		HPSE, PTPN1	Tyrosine phosphatase inhibitor
1812	39.78	cp	BRD-K46441700	GR-55562	Serotonin receptor antagonist		HTR1B, HTR1D	Serotonin receptor antagonist
1813	39.77	cp	BRD-A90799790	isradipine	Calcium channel blocker		CACNA1C, CACNA1D, CACNA2D1, CACNA1F, CACNA1H, CACNA1S, CACNA2D2, CACNB2	Calcium channel blocker
1814	39.71	cp	BRD-A26032986	zaldaride	Calmodulin antagonist		CALM1	Calmodulin antagonist
1816	39.63	cp	BRD-K40255344	tyrphostin-A9	Protein tyrosine kinase inhibitor			Protein tyrosine kinase inhibitor, Tyrosine kinase inhibitor
1818	39.56	cp	BRD-A90311807	cilastatin	Dehydropeptidase inhibitor		DPEP1	Dehydropeptidase inhibitor
1825	39.05	cp	BRD-K51066026	aminoindazole	Ionophore			Ionophore
1826	39.01	cp	BRD-K65639003	icariin	Phosphodiesterase inhibitor		NMUR2, PDE5A, SORD	Phosphodiesterase inhibitor
1833	38.84	cp	BRD-A67605442	tetrahydrobiopterin	Nitric oxide stimulant		PAH, TH, DBH, NOS3, TPH1	Nitric oxide stimulant, Nitric oxide synthase stimulant, Phenylalanine 4-hydroxylase stimulant
1843	38.55	cp	BRD-K69763916	LY-341495	Glutamate receptor antagonist		GRM2, GRM3	Glutamate receptor antagonist
1852	38.08	cp	BRD-A53576514	orphenadrine	Acetylcholine receptor antagonist		CYP2B6, GRIN1, GRIN2D, GRIN3A, GRIN3B, HRH1, SCN10A, SLC6A2	Acetylcholine receptor antagonist
1854	38.07	cp	BRD-K21350491	phenamil	TRPV antagonist		PKD2L1	TRPV antagonist
1857	37.99	cp	BRD-A62071884	siguazodan	Phosphodiesterase inhibitor		PDE3A	Phosphodiesterase inhibitor
1859	37.96	cp	BRD-K34581968	BMS-536924	IGF-1 inhibitor		IGF1R, AKT1, CCNE1, CDK2, CYP3A4, ERBB2, INSR, KDR, LCK, MAPK1, MET, PDGFRA, PDGFRB	IGF-1 inhibitor
1860	37.93	cp	BRD-A61858259	CAY-10415	Insulin sensitizer		INS	Insulin sensitizer
1862	37.92	cp	BRD-K03440695	boldine	Acetylcholine receptor antagonist		CHRNA4, CHRNB2, DRD1, DRD2	Acetylcholine receptor antagonist, Dopamine receptor antagonist
1873	37.66	cp	BRD-K08109516	L-701324	Glutamate receptor antagonist		GRIN1, GRIN2A, GRIN2B, GRIN2C, GRIN2D	Glutamate receptor antagonist
1874	37.56	cp	BRD-K69690935	curcumin	Cyclooxygenase inhibitor		PTGS1, PTGS2, APP, CA1, CA12, CA14, CA2, CA4, CA6, CA9, CCND1, CYP3A4, DNMT1, DNMT3B, EP300, G6PC, MAPT, MMP13, MMP9, NOS2, XDH	Cyclooxygenase inhibitor, Histone acetyltransferase inhibitor, Lipoxygenase inhibitor, NFkB pathway inhibitor
1879	37.43	cp	BRD-A35623999	CGP-37157	L-type calcium channel blocker		SLC8A1	L-type calcium channel blocker, Mitochondrial Na+/Ca2+ exchanger antagonist, Sodium/calcium exchange inhibitor
1881	37.42	cp	BRD-A36217750	sulfinpyrazone	Uricosuric blocker		ABCC1, ABCC2, FPR1, SLC22A12	Uricosuric blocker
1882	37.39	cp	BRD-A83237092	fulvestrant	Estrogen receptor antagonist		ESR1, EPHX2, ESR2, GPER1	Estrogen receptor antagonist
1884	37.28	cp	BRD-K94649603	taxifolin	Opioid receptor antagonist		APOB, APP, HMGCR	Opioid receptor antagonist
1885	37.28	cp	BRD-A84174393	meloxicam	Cyclooxygenase inhibitor		PTGS2, PTGS1	Cyclooxygenase inhibitor
1887	37.2	cp	BRD-K55930204	phenytoin	Hydantoin antiepileptic		ABCB1, CYP2B6, CYP2C19, CYP3A4, SCN1A, SCN2A, SCN5A	Hydantoin antiepileptic
1890	37.05	cp	BRD-K44899736	RO-16-6941	Monoamine oxidase inhibitor			Monoamine oxidase inhibitor
1893	36.98	cp	BRD-K04185004	oxybuprocaine	Local anesthetic		SCN10A	Local anesthetic
1894	36.96	cp	BRD-K66944906	fraxidin	Carbonic anhydrase inhibitor		CA1	Carbonic anhydrase inhibitor
1898	36.85	cp	BRD-K63675182	triflupromazine	Dopamine receptor antagonist		HTR2B, CHRM1, CHRM2, CHRNA7, DRD1, DRD2	Dopamine receptor antagonist
1900	36.79	cp	BRD-K09537769	NU-7026	DNA dependent protein kinase inhibitor		PRKDC	DNA dependent protein kinase inhibitor, MTOR inhibitor, PI3K inhibitor
1903	36.72	cp	BRD-A14798026	mestranol	Estrogen receptor agonist		ESR1	Estrogen receptor agonist
1905	36.69	cp	BRD-K01902415	pirinixic-acid	PPAR receptor agonist		PPARA	PPAR receptor agonist
1908	36.58	cp	BRD-K82036761	sertraline	Serotonin receptor antagonist		SLC6A4, CYP2C19, SLC6A3	Serotonin receptor antagonist
1911	36.33	cp	BRD-K81709173	halcinonide	Glucocorticoid receptor agonist		NR3C1	Glucocorticoid receptor agonist
1912	36.21	cp	BRD-K17896185	FIT	Opioid receptor agonist		OPRD1	Opioid receptor agonist
1915	36.09	cp	BRD-A79903587	tegafur	Thymidylate synthase inhibitor		TYMS	Thymidylate synthase inhibitor
1918	36.01	cp	BRD-K54708045	nTZDpa	PPAR receptor agonist		PPARG	PPAR receptor agonist
1919	35.99	cp	BRD-K94830329	ataluren	CFTR channel agonist		CFTR, DMD, F8, F9	CFTR channel agonist, Dystrophin stimulant
1926	35.56	cp	BRD-K26801045	pipamperone	Dopamine receptor antagonist		DRD2, HTR2A, HRH1, HTR1A, HTR1B, HTR1D	Dopamine receptor antagonist
1928	35.46	cp	BRD-A39390670	rabeprazole	ATPase inhibitor		ATP4A, CYP2C19	ATPase inhibitor, Gastrin inhibitor
1931	35.37	cp	BRD-K83023055	GR-135531	Melatonin receptor agonist			Melatonin receptor agonist
1935	35.2	cp	BRD-A24514565	warfarin	Vitamin K antagonist		VKORC1, CYP2C19, CYP2C8, CYP4F2	Vitamin K antagonist
1936	35.16	cp	BRD-K20313525	rosmarinic-acid	GABA transaminase inhibitor		MCL1, TYR	GABA transaminase inhibitor
1944	34.91	cp	BRD-A01593789	chlormadinone	5-alpha reductase inhibitor		PGR	5-alpha reductase inhibitor, Progesterone receptor agonist
1945	34.9	cp	BRD-A20239487	atenolol	Adrenergic receptor antagonist		ADRB1, ADRB2	Adrenergic receptor antagonist
1949	34.79	cp	BRD-K24201553	SB-269970	Serotonin receptor antagonist		HTR7	Serotonin receptor antagonist
1957	34.5	cp	BRD-K18523449	mestanolone	Androgenic steroid			Androgenic steroid
1960	34.29	cp	BRD-A99177642	deltaline	Acetylcholine receptor antagonist		CHRNA7	Acetylcholine receptor antagonist
1961	34.27	cp	BRD-K79602928	metformin	Insulin sensitizer		ACACB, INS, PRKAB1	Insulin sensitizer
1971	33.96	cp	BRD-K28470988	L-690330	Inositol monophosphatase inhibitor		IMPA1	Inositol monophosphatase inhibitor
1974	33.92	cp	BRD-K74763371	bosentan	Endothelin receptor antagonist		EDNRB, EDNRA, ABCB1, CYP2C19, CYP3A4	Endothelin receptor antagonist
1977	33.72	cp	BRD-K23335153	AMN-082	Glutamate receptor modulator		GRM7	Glutamate receptor modulator, Glutamate receptor positive allosteric modulator
1979	33.6	cp	BRD-A80775386	hyperforin	Cyclooxygenase inhibitor		NR1I2, ALOX5, PTGS1, TRPC6	Cyclooxygenase inhibitor, Dopamine uptake inhibitor, Interleukin receptor antagonist, Lipoxygenase inhibitor, Serotonin reuptake inhibitor
1982	33.53	cp	BRD-K88358234	xaliproden	Serotonin receptor agonist		HTR1A	Serotonin receptor agonist
1983	33.52	cp	BRD-A04668240	CGP-52432	GABA receptor antagonist		GABBR1, GABBR2	GABA receptor antagonist
1987	33.34	cp	BRD-A55815733	phylloquinone	Vitamin K		BGLAP, GGCX	Vitamin K, Gamma carboxylase enzyme
1989	33.23	cp	BRD-A96485169	EBPC	Aldose reductase inhibitor		AKR1B1	Aldose reductase inhibitor
1991	33.19	cp	BRD-K49945136	GR-113808	Serotonin receptor antagonist		HTR4	Serotonin receptor antagonist
1998	32.98	cp	BRD-K65910366	KUC103904N	-666			-666
2001	32.94	cp	BRD-K90543092	levonorgestrel	Estrogen receptor agonist		PGR, AR, CYP2E1, ESR1, SRD5A1	Estrogen receptor agonist, Glucocorticoid receptor antagonist, Progesterone receptor agonist, Progesterone receptor antagonist
2002	32.87	cp	BRD-A39522003	OMDM-2	FAAH inhibitor		GPR119	FAAH inhibitor
2005	32.82	cp	BRD-K26573499	DMAB-anabaseine	Adrenergic receptor agonist		CHRNA7	Adrenergic receptor agonist
2007	32.81	cp	BRD-K53545112	CNQX	Glutamate receptor antagonist		GRIA1, GRIA2, GRIA3, GRIA4	Glutamate receptor antagonist
2020	32.28	cp	BRD-K80325895	eicosadienoic-acid	-666			-666
2022	32.26	cp	BRD-K09186807	KIN001-244	Phosphoinositide dependent kinase inhibitor		PDPK1	Phosphoinositide dependent kinase inhibitor
2025	32.23	cp	BRD-K07403598	CAY-10470	NFkB pathway inhibitor		NFKB1, TNF	NFkB pathway inhibitor
2027	32.15	cp	BRD-A49358627	ciprofibrate	PPAR receptor agonist		PPARA, LPL	PPAR receptor agonist
2030	32.03	cp	BRD-K97056771	HY-11007	BCR-ABL kinase inhibitor		ABL1, BCR	BCR-ABL kinase inhibitor
2033	31.91	cp	BRD-K95202259	ML-3163	p38 MAPK inhibitor		CYP2D6, CYP3A4, MAPK11, MAPK12, MAPK14	p38 MAPK inhibitor
2044	31.67	cp	BRD-K18316707	O-1918	Cannabinoid receptor antagonist			Cannabinoid receptor antagonist
2047	31.52	cp	BRD-K35559145	levomepromazine	Dopamine receptor antagonist		ADRA1A, ADRA1B, ADRA1D, ADRA2A, ADRA2B, ADRA2C, CHRM1, CHRM2, CHRM3, CHRM4, CHRM5, DRD1, DRD2, DRD3, DRD4, DRD5, HRH1, HTR2A, HTR2C	Dopamine receptor antagonist
2052	31.35	cp	BRD-K43764301	dexketoprofen	Cyclooxygenase inhibitor		CXCR1, PTGS1, PTGS2, SLC5A8	Cyclooxygenase inhibitor
2054	31.29	cp	BRD-K28307902	flutamide	Androgen receptor antagonist		AR, AHR, CYP2C19	Androgen receptor antagonist
2055	31.28	cp	BRD-K71266197	PSB-06126	NTPDase inhibitor		ENTPD3	NTPDase inhibitor
2061	31.01	cp	BRD-K41260949	valproic-acid	HDAC inhibitor		ABAT, HDAC1, SCN1A, SCN3A, ACADSB, ALDH5A1, HDAC2, HDAC9, OGDH, SCN10A, SCN11A, SCN1B, SCN2A, SCN2B, SCN3B, SCN4A, SCN4B, SCN5A, SCN7A, SCN8A, SCN9A	HDAC inhibitor
2064	30.92	cp	BRD-K18194590	mephentermine	Adrenergic receptor agonist		ADRA1A, ADRA1B, ADRA1D, ADRA2A, ADRA2B, ADRA2C, ADRB1, ADRB2, ADRB3	Adrenergic receptor agonist
2068	30.84	cp	BRD-K10016611	pyridine-2-aldoxime	Acetylcholinesterase inhibitor		ACHE, BCHE	Acetylcholinesterase inhibitor
2070	30.78	cp	BRD-K61097567	SB-218795	Tachykinin antagonist		TACR3	Tachykinin antagonist
2071	30.77	cp	BRD-A10977446	carvedilol	Adrenergic receptor antagonist		ADRB1, ADRB2, ADRA1A, ADRA1B, ADRA1D, ADRA2A, ADRA2B, ADRA2C, ADRB3, CYP2C19, CYP2E1, GJA1, HIF1A, KCNH2, NDUFC2, NPPB, RYR2, SELE, VCAM1, VEGFA	Adrenergic receptor antagonist
2074	30.64	cp	BRD-K46742498	alosetron	Serotonin receptor antagonist		HTR3A	Serotonin receptor antagonist
2075	30.64	cp	BRD-A68039575	liquiritigenin	Aromatase inhibitor		CYP19A1	Aromatase inhibitor
2076	30.58	cp	BRD-K92428232	GSK-461364	PLK inhibitor		PLK1	PLK inhibitor
2078	30.52	cp	BRD-K61341215	vecuronium	Acetylcholine receptor antagonist		CHRNA2	Acetylcholine receptor antagonist
2079	30.5	cp	BRD-K20995441	U-54494A	Opioid receptor agonist			Opioid receptor agonist
2080	30.47	cp	BRD-K43164539	cholic-acid	Bile acid		CES1, FECH, PLA2G1B, ADH1C, COX4I1, COX5A, COX5B, COX6A2, COX6B1, COX6C, COX7A1, COX7B, COX7C, COX8A, ESRRG, FABP6, GPBAR1, MT-CO1, MT-CO2, MT-CO3	Bile acid
2081	30.45	cp	BRD-K34170797	fexaramine	FXR agonist		NR1H4	FXR agonist
2084	30.43	cp	BRD-K80396088	gliquidone	Sulfonylurea		ABCC8, KCNJ10, KCNJ11, KCNJ8	Sulfonylurea
2089	30.31	cp	BRD-K48692744	NU-1025	PARP inhibitor		PARP1	PARP inhibitor, DNA dependent protein kinase inhibitor
2090	30.27	cp	BRD-A09472452	flecainide	Sodium channel blocker		SCN5A, KCNA5, KCNA7, SCN4A	Sodium channel blocker
2094	30.19	cp	BRD-K90027355	spironolactone	Mineralocorticoid receptor antagonist		NR3C2, AR, CACNA1A, CACNA1B, CACNA1C, CACNA1D, CACNA1F, CACNA1G, CACNA1H, CACNA1I, CACNA1S, CACNA2D1, CACNA2D2, CACNA2D3, CACNB1, CACNB2, CACNB3, CACNB4, CACNG1, CYP11B2, KCNA5, KCND3, NR3C1, PGR, SCNN1A, SHBG	Mineralocorticoid receptor antagonist
2098	30.11	cp	BRD-K24538644	KUC104502N	-666		OPRK1	-666
2100	30.08	cp	BRD-K83794624	pirarubicin	Topoisomerase inhibitor		TOP2A	Topoisomerase inhibitor
2103	29.88	cp	BRD-K64670467	JNJ-16259685	Glutamate receptor antagonist		GRM1	Glutamate receptor antagonist
2104	29.85	cp	BRD-A84389633	tropanyl-3,5-dimethylbenzoate	Serotonin receptor antagonist			Serotonin receptor antagonist
2109	29.71	cp	BRD-K68558722	deracoxib	Cyclooxygenase inhibitor		PTGS2	Cyclooxygenase inhibitor
2115	29.64	cp	BRD-K21548250	moracizine	Sodium channel blocker		SCN5A	Sodium channel blocker
2125	29.44	cp	BRD-A61793559	metolazone	Carbonic anhydrase inhibitor		SLC12A3, CA2, CA7	Carbonic anhydrase inhibitor
2129	29.23	cp	BRD-A55913614	primaquine	Antimalarial		KRT7, NQO2	Antimalarial, DNA inhibitor
2131	29.19	cp	BRD-A77118605	BML-ST330	Phospholipase inhibitor			Phospholipase inhibitor
2133	29.16	cp	BRD-K96720755	relcovaptan	Vasopressin receptor antagonist		AVPR1A, AVPR1B, AVPR2, OXTR	Vasopressin receptor antagonist
2136	29.09	cp	BRD-A92537424	danazol	Estrogen receptor antagonist		ESR1, GNRHR, AR, CCL2, CYP2C8, GNRHR2, PGR, TNF	Estrogen receptor antagonist, Progesterone receptor agonist
2143	28.83	cp	BRD-A88774919	doxycycline	Bacterial 30S ribosomal subunit inhibitor		MMP8, MMP1	Bacterial 30S ribosomal subunit inhibitor, Metalloproteinase inhibitor
2147	28.74	cp	BRD-K05653692	DL-PDMP	Glucosyltransferase inhibitor		ASAH1, UGCG	Glucosyltransferase inhibitor
2148	28.7	cp	BRD-K26979635	NS-3694	Glutamate receptor antagonist		GRIK1	Glutamate receptor antagonist
2149	28.7	cp	BRD-A13133631	fluorometholone	Glucocorticoid receptor agonist		NR3C1	Glucocorticoid receptor agonist
2152	28.62	cp	BRD-A82656074	naltrindole	Opioid receptor antagonist		OPRD1, OPRK1, OPRM1	Opioid receptor antagonist
2154	28.6	cp	BRD-K95435023	PHA-665752	c-Met inhibitor		MET	c-Met inhibitor
2157	28.57	cp	BRD-A80213327	NSC-23766	Ras GTPase inhibitor			Ras GTPase inhibitor
2160	28.55	cp	BRD-A25576662	streptozotocin	DNA alkylating agent		SLC2A2	DNA alkylating agent
2162	28.51	cp	BRD-A56359832	zileuton	Leukotriene inhibitor		ALOX5	Leukotriene inhibitor, Lipoxygenase inhibitor
2166	28.4	cp	BRD-K61250553	loperamide	Opioid receptor agonist		OPRM1, OPRD1, CACNA1A, CALM1, CYP2B6, CYP2C8, NPR2, OPRK1, POMC	Opioid receptor agonist
2168	28.23	cp	BRD-A89672324	CGP-55845	GABA receptor antagonist		GABBR1, GABBR2, KCTD12, KCTD16, KCTD8	GABA receptor antagonist
2172	28.06	cp	BRD-K08502430	angiogenesis-inhibitor	Angiogenesis inhibitor		EGFR	Angiogenesis inhibitor
2173	27.97	cp	BRD-K17823458	danoprevir	HCV inhibitor			HCV inhibitor
2175	27.9	cp	BRD-K33864865	LY-225910	CCK receptor antagonist		CCKBR	CCK receptor antagonist
2177	27.88	cp	BRD-K23383398	T-0901317	LXR agonist		NR1H3, NR1H2, ABCA1, NCOA1, NCOA2, NR1I2, RORA, RORC, RXRB	LXR agonist, ABC transporter expression enhancer, ROR inverse agonist
2178	27.85	cp	BRD-K70883034	nimetazepam	GABA receptor agonist		GABRA1, GABRA2, GABRA3, GABRA5	GABA receptor agonist
2179	27.82	cp	BRD-K38449220	seneciphylline	Cytochrome P450 inhibitor			Cytochrome P450 inhibitor
2180	27.81	cp	BRD-K06198550	isorotenone	Mitochondrial complex I inhibitor		MT-ND1	Mitochondrial complex I inhibitor, NADH-ubiquinone oxidoreductase (Complex I) inhibitor
2182	27.77	cp	BRD-A65280694	molindone	Dopamine receptor antagonist		DRD2, HTR2A, CHRM1, DRD5, HRH1, HTR1A	Dopamine receptor antagonist
2193	27.42	cp	BRD-K37792168	denbufylline	Phosphodiesterase inhibitor		PDE4A, PDE4B, PDE4D	Phosphodiesterase inhibitor
2194	27.39	cp	BRD-K57926513	tyrphostin-AG-1295	PDGFR receptor inhibitor		FLT3, KDR, PDGFRA, PDGFRB	PDGFR receptor inhibitor
2196	27.36	cp	BRD-K32330832	VER-155008	HSP inhibitor		HSPA1A	HSP inhibitor
2197	27.35	cp	BRD-K31627533	rimexolone	Glucocorticoid receptor agonist		NR3C1, SERPINA6	Glucocorticoid receptor agonist
2198	27.35	cp	BRD-K80315159	DPPE	Histamine receptor antagonist		ABCB1, HRH1	Histamine receptor antagonist
2200	27.27	cp	BRD-K12102668	nialamide	Monoamine oxidase inhibitor		COMT, MAOA, MAOB	Monoamine oxidase inhibitor
2201	27.22	cp	BRD-K95739795	tetrabenazine	Vesicular monoamine transporter inhibitor		SLC18A2, DRD2, SLC18A1	Vesicular monoamine transporter inhibitor
2215	26.91	cp	BRD-K33204703	AG-370	PDGFR receptor inhibitor		PDGFRB	PDGFR receptor inhibitor
2216	26.89	cp	BRD-A33711280	metixene	Acetylcholine receptor antagonist		CHRM5, CHRM1, CHRM2, CHRM3, CHRM4	Acetylcholine receptor antagonist
2220	26.67	cp	BRD-K41707108	ceramide	Phosphoenolpyruvate carboxylase activator			Phosphoenolpyruvate carboxylase activator, Serine/threonine protein phosphatase activator
2224	26.53	cp	BRD-K26521938	dinoprostone	Prostanoid receptor agonist		PTGER2, PTGER1, PTGER3, PTGER4, CATSPER1, CATSPER2, CATSPER3, CATSPER4, PTGDR, PTGDR2, PTGFR, TBXA2R	Prostanoid receptor agonist
2227	26.4	cp	BRD-K50325075	UCL-2077	Slow after hyperpolarization channel blocker			Slow after hyperpolarization channel blocker
2234	26.3	cp	BRD-A39052811	mosapride	Serotonin receptor agonist		HTR4, HTR3A	Serotonin receptor agonist
2238	26.22	cp	BRD-K22009844	phenprobamate	Muscle relaxant			Muscle relaxant
2239	26.2	cp	BRD-K91733562	secoisolariciresinol	Antioxidant			Antioxidant
2240	26.2	cp	BRD-A80502530	cinobufagin	ATPase inhibitor		ATP1A1, ATP1A2, ATP1A3, ATP1A4, ATP1B1, ATP1B2, ATP1B3, ATP1B4, FXYD2	ATPase inhibitor
2245	25.96	cp	BRD-K26548821	quinpirole	Dopamine receptor agonist		DRD2, DRD3, DRD4, DRD1, HTR1A, HTR2A, HTR2B, HTR2C	Dopamine receptor agonist
2265	25.51	cp	BRD-A83937277	mephenytoin	Hydantoin antiepileptic		SCN5A, CYP2C19	Hydantoin antiepileptic
2267	25.49	cp	BRD-K94441233	mevastatin	HMGCR inhibitor		HMGCR	HMGCR inhibitor
2268	25.44	cp	BRD-K91900765	VX-745	p38 MAPK inhibitor		MAPK14, MAPK11, MAPK12	p38 MAPK inhibitor
2272	25.39	cp	BRD-A84327315	calcitriol	Vitamin D receptor agonist		VDR, CYP3A5	Vitamin D receptor agonist
2281	25.32	cp	BRD-K48722833	iloperidone	Dopamine receptor antagonist		DRD2, HTR2A, HTR1A, HTR6, HTR7, ADRA1A, ADRA2C, DRD1, DRD3, DRD4, HRH1	Dopamine receptor antagonist, Serotonin receptor antagonist
2287	25.22	cp	BRD-K82216340	medroxyprogesterone	progesterone receptor agonist		PGR, ESR1	progesterone receptor agonist
2290	25.17	cp	BRD-K81272440	dantrolene	Calcium channel blocker		RYR1, RYR3	Calcium channel blocker
2295	25.08	cp	BRD-K71430621	clobenpropit	Histamine receptor antagonist		HRH3, HRH4, HRH1, HRH2	Histamine receptor antagonist
2309	24.8	cp	BRD-K36324071	NF-449	Purinergic receptor antagonist		P2RX1	Purinergic receptor antagonist
2312	24.69	cp	BRD-K11801786	trimidox	Ribonucleotide reductase inhibitor		RRM1	Ribonucleotide reductase inhibitor
2313	24.67	cp	BRD-K47659338	EMD-386088	Serotonin receptor agonist		HTR6	Serotonin receptor agonist
2318	24.63	cp	BRD-K46469693	SCH-442416	Adenosine receptor antagonist		ADORA1, ADORA2A, ADORA2B, ADORA3	Adenosine receptor antagonist
2319	24.62	cp	BRD-K87990216	piretanide	Glucocorticoid receptor agonist		SLC12A1, SLC12A2	Glucocorticoid receptor agonist
2320	24.61	cp	BRD-A26845397	isamoltan	Adrenergic receptor antagonist		ADRB1, ADRB2	Adrenergic receptor antagonist
2329	24.44	cp	BRD-A01317026	7,8-dihydro-L-biopterin	Dihydroneopterin aldolase inhibitor		NOS2, TPH1	Dihydroneopterin aldolase inhibitor
2330	24.44	cp	BRD-A54596827	solifenacin	Acetylcholine receptor antagonist		CHRM3, CHRM1, CHRM2, CHRM4, CHRM5	Acetylcholine receptor antagonist
2337	24.29	cp	BRD-K51918615	iodophenpropit	Histamine receptor antagonist		HRH3, HRH4, GRIN2B	Histamine receptor antagonist
2339	24.25	cp	BRD-K66615216	moxifloxacin	Bacterial DNA gyrase inhibitor		TOP2A	Bacterial DNA gyrase inhibitor
2340	24.23	cp	BRD-K52930707	rescinnamine	ACE inhibitor		ACE	ACE inhibitor
2343	24.13	cp	BRD-K83637872	SANT-1	Smoothened receptor antagonist		DHH, IHH, PTCH1, SMO	Smoothened receptor antagonist
2345	24.03	cp	BRD-A51182606	chloramphenicol	Protein synthesis inhibitor		CD55, CYP2C19	Protein synthesis inhibitor, Bacterial 50S ribosomal subunit inhibitor
2346	24.03	cp	BRD-A67438293	treprostinil	Prostacyclin analog		PTGIR, CYP2C8, P2RY12, PPARD, PTGDR, PTGER1, PTGER2, PTGER3, PTGER4	Prostacyclin analog
2347	24.03	cp	BRD-K40782193	QX-222	Sodium channel blocker			Sodium channel blocker
2355	23.85	cp	BRD-A65767837	hydrocortisone	Glucocorticoid receptor agonist		ANXA1, NOS2, NR3C1, NR3C2	Glucocorticoid receptor agonist
2357	23.84	cp	BRD-K05464208	JX-401	p38 MAPK inhibitor		MAPK14	p38 MAPK inhibitor
2358	23.84	cp	BRD-K74430258	1,2-dichlorobenzene	Hepatotoxicant			Hepatotoxicant, Organic compound
2361	23.78	cp	BRD-K07325606	hispidin	PKC inhibitor		PREP, PRKCB, PTGS2, XDH	PKC inhibitor
2363	23.67	cp	BRD-K10995081	perphenazine	Dopamine receptor antagonist		DRD2, CALM1, DRD1, HRH1, HTR2A, HTR2C, HTR6, HTR7	Dopamine receptor antagonist
2368	23.57	cp	BRD-K71103788	duloxetine	Serotonin reuptake inhibitor		SLC6A2, SLC6A4, SLC6A3, HTR2A, HTR2C, HTR6	Serotonin reuptake inhibitor, Norepinephrine reuptake inhibitor
2371	23.55	cp	BRD-K38436528	imipramine	Norepinephrine reuptake inhibitor		SLC6A2, SLC6A4, CHRM2, ADRA1A, ADRA1B, ADRA1D, CHRM1, CHRM3, CHRM4, CHRM5, CYP2C19, DRD1, DRD2, DRD5, HRH1, HTR1A, HTR2A, HTR2C, HTR6, HTR7, KCND2, KCND3, KCNH1, KCNH2, SLC6A3	Norepinephrine reuptake inhibitor, Serotonin reuptake inhibitor
2375	23.5	cp	BRD-A17655518	ibuprofen	Cyclooxygenase inhibitor		PTGS2, PTGS1, ASIC1, BCL2, CFTR, CYP2C8, FABP2, PLAT, PPARG, SLC5A8, THBD	Cyclooxygenase inhibitor, NFkB pathway inhibitor
2380	23.37	cp	BRD-K20197062	SA-94315	Caspase inhibitor		CASP3	Caspase inhibitor
2381	23.33	cp	BRD-K18905250	ST-91	Adrenergic receptor agonist			Adrenergic receptor agonist
2383	23.28	cp	BRD-K93880783	stavudine	DNA directed DNA polymerase inhibitor			DNA directed DNA polymerase inhibitor, Reverse transcriptase inhibitor
2385	23.26	cp	BRD-K26241953	piceatannol	SYK inhibitor		ATP5A1, ATP5B, ATP5C1, IRF3, PTGS2, SIRT1, SYK, TYR	SYK inhibitor
2389	23.21	cp	BRD-A13946108	sulindac	Cyclooxygenase inhibitor		AKR1B1, PTGS1, PTGS2, MAPK3, PPARD, PTGDR2	Cyclooxygenase inhibitor
2392	23.13	cp	BRD-A81402010	KU-C103443N	CDC inhibitor			CDC inhibitor, Rho associated kinase inhibitor
2401	22.84	cp	BRD-A43930669	L-368899	Oxytocin receptor antagonist		OXTR, AVPR1A, AVPR2, OXT	Oxytocin receptor antagonist
2402	22.84	cp	BRD-K66876909	linezolid	Bacterial 50S ribosomal subunit inhibitor		MAOA	Bacterial 50S ribosomal subunit inhibitor
2404	22.83	cp	BRD-K20920669	cromoglicic-acid	Immunosuppressant		KCNMA1, S100P	Immunosuppressant
2408	22.77	cp	BRD-A43974575	tranylcypromine	Monoamine oxidase inhibitor		MAOA, MAOB, KDM1A, CYP2A6	Monoamine oxidase inhibitor
2413	22.59	cp	BRD-A84134924	pancuronium	Acetylcholine receptor antagonist		CHRM2, CHRM3, CHRNA1, CHRNA2	Acetylcholine receptor antagonist
2426	22.11	cp	BRD-A25775766	securinine	GABA receptor antagonist		GABRA1	GABA receptor antagonist, TP53 activator
2429	22.05	cp	BRD-K07996107	harpagoside	Acetylcholinesterase inhibitor		ACHE	Acetylcholinesterase inhibitor
2441	21.69	cp	BRD-K19309090	SR-95639A	Acetylcholine receptor agonist		CHRM1	Acetylcholine receptor agonist
2446	21.66	cp	BRD-A18763547	BAX-channel-blocker	Cytochrome C release inhibitor		BAX	Cytochrome C release inhibitor
2447	21.62	cp	BRD-K10177585	PSB-11	Adenosine receptor antagonist		ADORA3, ADORA1, ADORA2A	Adenosine receptor antagonist
2448	21.57	cp	BRD-K07888196	tyrphostin-AG-538	IGF-1 inhibitor		EGFR	IGF-1 inhibitor
2450	21.55	cp	BRD-A24191444	ifenprodil	Adrenergic receptor antagonist		GRIN1, GRIN2B	Adrenergic receptor antagonist, Glutamate receptor antagonist
2452	21.53	cp	BRD-K70487031	flupentixol	Dopamine receptor antagonist		DRD2, DRD1, ADRA1A, CHRM1, DRD3, DRD5, HTR2A	Dopamine receptor antagonist
2453	21.51	cp	BRD-K01567962	pyrazolanthrone	JNK inhibitor		MAPK10, MAPK8, MAPK9, TTK, LRRK2, MAPK8IP1	JNK inhibitor
2459	21.46	cp	BRD-K42098891	protriptyline	Tricyclic antidepressant		SLC6A2, SLC6A4	Tricyclic antidepressant
2462	21.42	cp	BRD-K47679368	bromfenac	Cyclooxygenase inhibitor		PTGS1, PTGS2	Cyclooxygenase inhibitor
2464	21.25	cp	BRD-K59633790	VU-0420363-1	SARS coronavirus 3C-like protease inhibitor			SARS coronavirus 3C-like protease inhibitor
2474	20.9	cp	BRD-A09722536	cyclophosphamide	DNA alkylating agent		BCL2, CYP2B6, CYP2C19, CYP3A5, LGALS1	DNA alkylating agent
2477	20.87	cp	BRD-K52662033	lidocaine	Histamine receptor agonist		SCN5A, EGFR, SCN10A, SCN9A	Histamine receptor agonist
2492	20.54	cp	BRD-K79684402	RO-10-5824	Dopamine receptor agonist		DRD4	Dopamine receptor agonist
2493	20.51	cp	BRD-A57457122	VU-0400071-3	Glutamate receptor modulator		GRM4	Glutamate receptor modulator
2500	20.43	cp	BRD-K59570838	homoveratrylamine	Dopamine analog			Dopamine analog
2502	20.41	cp	BRD-K97309399	thiothixene	Dopamine receptor antagonist		HTR2A, DRD1, DRD2, HRH1	Dopamine receptor antagonist
2504	20.33	cp	BRD-A34751532	homosalate	HSP inducer			HSP inducer
2509	20.26	cp	BRD-K67831364	ZM-323881	VEGFR inhibitor		KDR	VEGFR inhibitor
2511	20.1	cp	BRD-K53737926	amitriptyline	Norepinephrine inhibitor		CHRM1, CHRM2, CHRM3, CHRM4, CHRM5, HRH1, HTR6, SLC6A2, SLC6A4, ADRA1A, ADRA1B, ADRA1D, ADRA2A, ADRB1, ADRB2, ADRB3, HRH2, HRH4, HTR1A, HTR1B, HTR1D, HTR2A, HTR2C, HTR7, KCNA1, KCND2, KCND3, KCNQ2, KCNQ3, NTRK1, NTRK2, OPRD1, OPRK1, OPRM1, SIGMAR1	Norepinephrine inhibitor, Norepinephrine reuptake inhibitor, Serotonin receptor antagonist, Serotonin reuptake inhibitor
2516	19.83	cp	BRD-K46862739	metyrapone	Cytochrome P450 inhibitor		CYP11B1, HSD11B1, NR3C2	Cytochrome P450 inhibitor
2517	19.82	cp	BRD-K46142322	RS-67333	Serotonin receptor partial agonist		HTR4	Serotonin receptor partial agonist
2520	19.69	cp	BRD-A96456596	FPL-55712	Leukotriene receptor antagonist			Leukotriene receptor antagonist
2522	19.68	cp	BRD-K43880410	pregnenolone	glutamate receptor modulator		CYP17A1, PGR, SULT2B1	glutamate receptor modulator
2526	19.49	cp	BRD-K83597974	pargyline	Monoamine oxidase inhibitor		MAOB, MAOA	Monoamine oxidase inhibitor
2527	19.49	cp	BRD-K67100011	pivmecillinam	Bacterial cell wall synthesis inhibitor			Bacterial cell wall synthesis inhibitor
2532	19.04	cp	BRD-A50675702	fipronil	GABA gated chloride channel blocker			GABA gated chloride channel blocker, Chloride channel blocker
2533	18.97	cp	BRD-K79124250	ioxaglic-acid	Radiopaque medium			Radiopaque medium
2534	18.96	cp	BRD-K53878242	MMPX	Phosphodiesterase inhibitor			Phosphodiesterase inhibitor
2536	18.95	cp	BRD-A52282606	lacidipine	Calcium channel blocker		CACNA1C	Calcium channel blocker
2537	18.95	cp	BRD-A84389091	L-655708	GABA receptor inverse agonist		GABRA5, GABRA1, GABRA2, GABRA3, GABRG2	GABA receptor inverse agonist
2543	18.79	cp	BRD-K66766661	17-beta-estradiol	Estrogen receptor agonist		ESR1	Estrogen receptor agonist
2544	18.75	cp	BRD-K41713976	E-4031	Potassium channel blocker		KCNH2, KCNH1	Potassium channel blocker
2548	18.68	cp	BRD-K62310379	fluticasone	Glucocorticoid receptor agonist		NR3C1, CYP3A5, CYP3A7, NR3C2, PGR, PLA2G4A	Glucocorticoid receptor agonist
2551	18.65	cp	BRD-A32164164	methyllycaconitine	Acetylcholine receptor antagonist		CHRNA7	Acetylcholine receptor antagonist
2552	18.62	cp	BRD-K00610438	altanserin	Serotonin receptor antagonist		HTR2A, HTR2C	Serotonin receptor antagonist
2555	18.6	cp	BRD-K57304726	PRE-084	Sigma receptor agonist		SIGMAR1	Sigma receptor agonist
2560	18.49	cp	BRD-K88560311	rucaparib	PARP inhibitor		PARP1, PARP2	PARP inhibitor
2575	18.1	cp	BRD-A94543220	bifonazole	Sterol demethylase inhibitor		CYP2B6	Sterol demethylase inhibitor
2581	17.99	cp	BRD-K87049188	fusaric-acid	Dopamine beta hydroxylase inhibitor		DBH	Dopamine beta hydroxylase inhibitor
2582	17.99	cp	BRD-K67847053	guanabenz	Adrenergic receptor agonist		ADRA2A, ADRA2B, ADRA2C	Adrenergic receptor agonist
2584	17.91	cp	BRD-A69960130	bromocriptine	Dopamine receptor agonist		DRD2, ADRA2A, ADRA2B, ADRA2C, DRD1, DRD3, DRD4, DRD5, HTR1A, HTR1B, HTR1D, HTR2A, HTR2B, HTR2C, ADRA1A, ADRA1B, ADRA1D, HTR6, HTR7, PRL	Dopamine receptor agonist
2586	17.88	cp	BRD-A10903566	imiloxan	Adrenergic receptor antagonist		ADRA2B	Adrenergic receptor antagonist
2594	17.67	cp	BRD-K70358946	aripiprazole	Serotonin receptor agonist		DRD2, HTR1A, HTR2A, HRH1, HTR1B, HTR1D, HTR2C, ADRA1A, ADRA1B, ADRA2A, ADRA2B, ADRA2C, CHRM1, CHRM2, CHRM3, CHRM4, CHRM5, DRD1, DRD3, DRD4, DRD5, HTR1E, HTR3A, HTR6, HTR7	Serotonin receptor agonist, Serotonin receptor antagonist
2595	17.63	cp	BRD-K94379058	BML-190	Cannabinoid receptor inverse agonist		CNR2	Cannabinoid receptor inverse agonist
2596	17.62	cp	BRD-K95609758	BMS-191011	Potassium channel activator		KCNMA1	Potassium channel activator
2610	17.23	cp	BRD-K21936341	oxotremorine	Acetylcholine receptor agonist		CHRM2, CHRM1, CHRM3, CHRM4	Acetylcholine receptor agonist, Cholinergic receptor agonist
2611	17.2	cp	BRD-K99818283	PIK-90	PI3K inhibitor			PI3K inhibitor
2616	17.04	cp	BRD-K32610195	androstenedione	Cytochrome P450 inhibitor		AKR1C3, HSD17B1, HSD3B1	Cytochrome P450 inhibitor
2618	16.91	cp	BRD-A55393291	testosterone	Androgen receptor agonist		AR, CYP19A1, CYP2C19, CYP2C8, CYP3A5	Androgen receptor agonist
2619	16.88	cp	BRD-K67013324	luzindole	Melatonin receptor antagonist		MTNR1B, MTNR1A	Melatonin receptor antagonist
2620	16.83	cp	BRD-K33396764	alpha-linolenic-acid	Omega 3 fatty acid stimulant		ELOVL4, FADS1, FADS2, FFAR1, FFAR4, PTGS2, SLC8A1, TRPV1	Omega 3 fatty acid stimulant
2625	16.7	cp	BRD-K41731458	triclosan	Enoyl-[acyl-carrier-protein] reductase [NADH] inhibitor		DNMT1	Enoyl-[acyl-carrier-protein] reductase [NADH] inhibitor
2626	16.68	cp	BRD-A77050075	heraclenol	Vitamin K antagonist			Vitamin K antagonist
2627	16.68	cp	BRD-K23583188	lavendustin-a	EGFR inhibitor		EGFR, LCK	EGFR inhibitor
2630	16.59	cp	BRD-K52394958	GR-159897	Tachykinin antagonist		TACR2, TAC1	Tachykinin antagonist
2638	16.38	cp	BRD-K25741894	skimmianine	Acetylcholinesterase inhibitor			Acetylcholinesterase inhibitor, Furoquinoline alkaloid
2645	16.18	cp	BRD-K31054881	BMY-7378	Adrenergic receptor antagonist		HTR1A, ADRA1D, ADRA1A, ADRA1B	Adrenergic receptor antagonist, Serotonin receptor antagonist
2647	16.06	cp	BRD-A73909368	dactinomycin	RNA polymerase inhibitor		POLR2A	RNA polymerase inhibitor
2653	15.97	cp	BRD-K45479396	BP-554	Serotonin receptor agonist		HTR1A	Serotonin receptor agonist
2659	15.76	cp	BRD-K03670461	tyrphostin-AG-82	EGFR inhibitor		EGFR, LCK	EGFR inhibitor
2673	15.45	cp	BRD-A26095496	clobetasol	Glucocorticoid receptor agonist		NR3C1, PLA2G1B	Glucocorticoid receptor agonist
2679	15.17	cp	BRD-K15567136	papaverine	Phosphodiesterase inhibitor		PDE10A, PDE4B, PDE5A	Phosphodiesterase inhibitor
2683	15.05	cp	BRD-A49225603	alimemazine	Histamine receptor agonist		HRH1	Histamine receptor agonist
2689	14.99	cp	BRD-K98769987	flumazenil	Benzodiazepine receptor antagonist		GABRA1, GABRA2, GABRA3, GABRA5, GABRA4, GABRA6, GABRB1, GABRB2, GABRB3, GABRD, GABRE, GABRG1, GABRG2, GABRG3, GABRP, GABRQ	Benzodiazepine receptor antagonist
2692	14.96	cp	BRD-K61177364	NBI-27914	CRF receptor antagonist		CRHR1	CRF receptor antagonist
2694	14.94	cp	BRD-K11163873	phenanthridone	PARP inhibitor		PARP1	PARP inhibitor
2700	14.79	cp	BRD-K82746043	navitoclax	BCL inhibitor		BCL2, BCL2L1, BCL2L2	BCL inhibitor
2701	14.76	cp	BRD-K16485616	mocetinostat	HDAC inhibitor		HDAC1, HDAC2, HDAC3, HDAC11	HDAC inhibitor
2703	14.73	cp	BRD-K73589491	nizatidine	Histamine receptor antagonist		HRH2	Histamine receptor antagonist
2704	14.68	cp	BRD-K50128260	sildenafil	Phosphodiesterase inhibitor		PDE5A, PDE6G, PDE6H, SLCO1B1, SLCO1B3	Phosphodiesterase inhibitor
2705	14.58	cp	BRD-A48570745	ivermectin	GABA receptor agonist		CHRNA7, GABRB3, GLRA3, P2RX7	GABA receptor agonist
2707	14.51	cp	BRD-A80641450	FR-139317	Endothelin receptor antagonist		EDNRA	Endothelin receptor antagonist
2709	14.44	cp	BRD-K05901394	terguride	Dopamine receptor agonist		DRD2, HTR2A, HTR2B, ADRA1A, ADRA2A, ADRA2B, ADRA2C, DRD3, DRD4, HTR1A, HTR1B, HTR1D, HTR2C, PRL	Dopamine receptor agonist, Serotonin receptor antagonist
2710	14.42	cp	BRD-A52326238	isogedunin	HSP inhibitor			HSP inhibitor
2713	14.33	cp	BRD-K63792901	arecaidine	Acetylcholine receptor agonist		CHRM1, CHRM2, CHRM3, CHRM4	Acetylcholine receptor agonist
2715	14.3	cp	BRD-A46186775	hydrocortisone	Glucocorticoid receptor agonist		ANXA1, NOS2, NR3C1, NR3C2	Glucocorticoid receptor agonist
2718	14.2	cp	BRD-K64245000	GW-4064	FXR agonist		NR1H4	FXR agonist
2722	14.12	cp	BRD-A23637604	oxymetholone	Androgen receptor agonist		AR	Androgen receptor agonist
2725	13.98	cp	BRD-K24675965	LY-288513	CCK receptor antagonist		CCKBR	CCK receptor antagonist
2734	13.68	cp	BRD-A09533288	verapamil	Calcium channel blocker		CACNA1C, CACNA1D, CACNA1G, CACNA1S, CACNA1A, CACNA1B, CACNA1F, CACNA1I, CACNB1, CACNB2, CACNB3, CACNB4, CYP2C8, CYP2E1, CYP3A4, CYP3A5, CYP3A7, DRD2, KCNA10, KCNA7, KCNH2, KCNJ11, NALCN, SCN5A, SLC29A4, SLC6A4	Calcium channel blocker
2740	13.57	cp	BRD-K18799075	BAY-59-3074	Cannabinoid receptor partial agonist		CNR1, CNR2	Cannabinoid receptor partial agonist
2747	13.5	cp	BRD-A71657825	2-(biphenyl-4-ylsulfonamido)pentanedioic-acid	Matrix metalloprotease inhibitor		MMP13, MMP8, MMP9	Matrix metalloprotease inhibitor
2748	13.46	cp	BRD-K97799481	theophylline	Adenosine receptor antagonist		ADORA1, ADORA2A, ADORA2B, ADORA3, CHIA, CYP2E1, CYP3A4, HDAC2, PDE3A, PDE4A, PDE4B, PDE5A	Adenosine receptor antagonist
2749	13.46	cp	BRD-K09764130	mead-ethanolamide	Cannabinoid receptor agonist			Cannabinoid receptor agonist
2752	13.45	cp	BRD-K53263234	CITCO	CAR agonist		NR1I3	CAR agonist
2753	13.35	cp	BRD-K14681867	somatostatin	Somatostatin receptor agonist		SSTR1, SSTR2, SSTR3, SSTR4, SSTR5, GH1, GHR, OPRD1, OPRM1	Somatostatin receptor agonist
2756	13.27	cp	BRD-K37561857	zardaverine	Phosphodiesterase inhibitor		PDE4D, PDE3A, PDE4A, PDE4B, PDE4C	Phosphodiesterase inhibitor
2764	13.12	cp	BRD-K99946902	hexylresorcinol	Local anesthetic		TYR	Local anesthetic
2767	13.01	cp	BRD-A02180903	betamethasone	Glucocorticoid receptor agonist		NR3C1	Glucocorticoid receptor agonist, Anti-inflammatory
2775	12.86	cp	BRD-K22227508	targinine	Nitric oxide synthase inhibitor		NOS2, NOS3	Nitric oxide synthase inhibitor
2779	12.74	cp	BRD-K52911425	GDC-0941	PI3K inhibitor		PIK3CG, PIK3CA, PIK3CB, PIK3CD	PI3K inhibitor
2780	12.73	cp	BRD-K49404994	levetiracetam	Calcium channel blocker		SV2A, CACNA1B, SCN1A	Calcium channel blocker
2782	12.69	cp	BRD-K81209512	AG-494	EGFR inhibitor		EGFR	EGFR inhibitor, Tyrosine kinase inhibitor
2785	12.58	cp	BRD-K87510569	RS-504393	CC chemokine receptor antagonist		CCR2, CCL2	CC chemokine receptor antagonist
2789	12.46	cp	BRD-A52172093	VU-0413807-2	Calcium channel blocker		CACNA1G, CACNA1H, CACNA1I	Calcium channel blocker
2790	12.46	cp	BRD-K32292990	CGP-53353	EGFR inhibitor		EGFR, PRKCB	EGFR inhibitor, PKC inhibitor
2793	12.41	cp	BRD-K39746403	erythromycin	NFkB pathway inhibitor		CYP3A4, MLNR	NFkB pathway inhibitor
2795	12.38	cp	BRD-A47633927	NPC-15199	ICAM1 antagonist		ICAM1, PPARG	ICAM1 antagonist
2796	12.37	cp	BRD-K63533170	AM-630	Cannabinoid receptor antagonist		CNR2, CNR1	Cannabinoid receptor antagonist
2799	12.26	cp	BRD-K04710043	hexamethylenebisacetamide	AKT inhibitor			AKT inhibitor, Differentiation inducer, NFkB pathway inhibitor
2804	12.19	cp	BRD-A75479906	rimantadine	Antiviral			Antiviral, RNA synthesis inhibitor
2805	12.15	cp	BRD-K17561142	amiodarone	Potassium channel blocker		KCNH2, ADRB1, CACNA1H, CACNA2D2, CHRM3, CYP2C8, KCNA7, SCN5A	Potassium channel blocker
2812	11.89	cp	BRD-K38323065	phenacetin	Cyclooxygenase inhibitor		PTGS1	Cyclooxygenase inhibitor
2815	11.77	cp	BRD-A19053259	pseudopelletierine	Anthelmintic			Anthelmintic
2818	11.66	cp	BRD-K07507905	BRL-37344	Adrenergic receptor agonist		ADRB3, ADRB1, ADRB2	Adrenergic receptor agonist
2819	11.64	cp	BRD-K16664969	GTP-14564	FLT3 inhibitor		FLT3, CSF1R, KIT, PDGFRB	FLT3 inhibitor, Tyrosine kinase inhibitor
2823	11.45	cp	BRD-K28849549	mesalazine	Cyclooxygenase inhibitor		PTGS1, PPARG, PTGS2, ALOX5, CHUK, CTNNB1, IKBKB, MPO, NAT1	Cyclooxygenase inhibitor, Lipoxygenase inhibitor, Prostanoid receptor antagonist
2830	11.24	cp	BRD-K41903098	diphenoxylate	Opioid receptor agonist		OPRM1, OPRD1	Opioid receptor agonist
2831	11.24	cp	BRD-K04170657	psoromic-acid	Ras GTPase inhibitor			Ras GTPase inhibitor
2840	11.07	cp	BRD-K78084463	W-12	Calmodulin antagonist			Calmodulin antagonist
2841	11.06	cp	BRD-K91315211	betahistine	Histamine receptor agonist		HRH3, HRH1	Histamine receptor agonist, Histamine receptor antagonist
2845	10.92	cp	BRD-K77390737	xanthohumol	ATPase inhibitor		CYP19A1, VCP	ATPase inhibitor
2846	10.9	cp	BRD-A35989968	megestrol	Progesterone receptor agonist		PGR	Progesterone receptor agonist
2858	10.6	cp	BRD-K41567364	SB-334867	Orexin receptor antagonist		HCRTR1, HCRTR2	Orexin receptor antagonist
2861	10.56	cp	BRD-A28422058	L-689560	Glutamate receptor antagonist		GRIN1, GRIN2A, GRIN2B, GRIN2C, GRIN2D	Glutamate receptor antagonist
2876	10.26	cp	BRD-K80738081	resveratrol	Cytochrome P450 inhibitor		PTGS1, PTGS2, SIRT1, APOA1, BACE1, CSNK2A1, MAOA, NQO2, SCN5A, TXNRD1, TXNRD2, XDH	Cytochrome P450 inhibitor, SIRT activator
2877	10.18	cp	BRD-K35531059	molsidomine	Guanylyl cyclase activator		GUCY1A3	Guanylyl cyclase activator
2883	9.96	cp	BRD-K93176058	AC-55649	Retinoid receptor agonist		RARB, RARA	Retinoid receptor agonist
2887	9.88	cp	BRD-K25311561	KU-55933	ATM kinase inhibitor		ATM, PRKDC	ATM kinase inhibitor
2888	9.86	cp	BRD-K85013741	auraptene	Nitric oxide production inhibitor		MAOB	Nitric oxide production inhibitor
2889	9.82	cp	BRD-K83302049	protopine	Histamine receptor antagonist		ACHE, SLC6A2, SLC6A4	Histamine receptor antagonist
2890	9.8	cp	BRD-A73581086	ergometrine	Adrenergic receptor agonist		ADRA1A, HTR1E, HTR2A	Adrenergic receptor agonist, Serotonin receptor agonist
2897	9.6	cp	BRD-A38898897	GW-311616	Leukocyte elastase inhibitor		ELANE	Leukocyte elastase inhibitor
2898	9.55	cp	BRD-K00959089	thenoyltrifluoroacetone	Chelating agent		CES1, PPARA, SDHA	Chelating agent
2899	9.55	cp	BRD-A93659613	GR-89696	Opioid receptor agonist		OPRK1	Opioid receptor agonist
2906	9.08	cp	BRD-K96862998	pirfenidone	TGF beta receptor inhibitor		TNF, FURIN, MAPK14, TNFRSF1A	TGF beta receptor inhibitor
2916	8.75	cp	BRD-A48720949	testosterone	androgen receptor agonist		AR, CYP19A1, CYP2C19, CYP2C8, CYP3A5	androgen receptor agonist
2928	8.42	cp	BRD-K47717570	NBQX	Glutamate receptor antagonist		GRIA1, GRIA2, GRIA3, GRIA4, GRIK1, GRIN1, GRIN2A, GRIN2B	Glutamate receptor antagonist
2929	8.41	cp	BRD-K87158025	benzamil	Sodium channel blocker		PKD2L1, SCNN1A, SCNN1B, SCNN1G, ASIC1, SCNN1D, SLC8A1	Sodium channel blocker
2932	8.28	cp	BRD-K73982490	BI-78D3	JNK inhibitor		MAPK8	JNK inhibitor
2935	8.16	cp	BRD-K47639036	flavoxate	Acetylcholine receptor antagonist		CHRM1, CHRM2	Acetylcholine receptor antagonist
2936	8.08	cp	BRD-A22143024	estropipate	Estrogen receptor agonist		ESR1, ESR2	Estrogen receptor agonist
2942	7.89	cp	BRD-K09907482	PRL-3-inhibitor-I	Tyrosine phosphatase inhibitor		PTP4A3	Tyrosine phosphatase inhibitor
2944	7.79	cp	BRD-K68264559	brimonidine	Adrenergic receptor agonist		ADRA2A, ADRA2B, ADRA2C, AOX1	Adrenergic receptor agonist
2954	7.48	cp	BRD-K94887716	TFMPP	Serotonin receptor agonist			Serotonin receptor agonist, Serotonin receptor antagonist
2956	7.43	cp	BRD-K38305202	domperidone	Dopamine receptor antagonist		DRD2, DRD3, ABCG2, CYP3A5	Dopamine receptor antagonist
2958	7.35	cp	BRD-A19195498	trimipramine	Norepinephrine reuptake inhibitor		SLC6A2, SLC6A4, SLC6A3, ADRA1A, ADRA1B, ADRA2A, ADRA2B, ADRB1, ADRB2, ADRB3, CHRM1, CHRM2, CHRM3, CHRM4, CHRM5, DRD1, DRD2, DRD5, HRH1, HTR1A, HTR1D, HTR2A, HTR2C, HTR3A	Norepinephrine reuptake inhibitor, Tricyclic antidepressant
2960	7.33	cp	BRD-K32755366	reserpic-acid	Norepinephrine transporter inhibitor			Norepinephrine transporter inhibitor
2961	7.31	cp	BRD-A39230911	chlorphensin	Muscle relaxant			Muscle relaxant
2965	7.05	cp	BRD-K44094599	tacrolimus	Calcineurin inhibitor		FKBP1A, CYP3A5, CYP3A7	Calcineurin inhibitor
2968	6.99	cp	BRD-K88679075	methandriol	Androgenic steroid			Androgenic steroid
2972	6.79	cp	BRD-K68507560	dicycloverine	Acetylcholine receptor antagonist		CHRM1, CHRM2, CHRM3	Acetylcholine receptor antagonist
2980	6.43	cp	BRD-A83431637	resmethrin	Cytochrome P450 inhibitor			Cytochrome P450 inhibitor
2984	6.12	cp	BRD-K00317371	RITA	MDM inhibitor		MDM2, TXNRD1, TXNRD2	MDM inhibitor
2986	6.03	cp	BRD-A48261811	argatroban	Thrombin inhibitor		F2, CYP3A5	Thrombin inhibitor
2991	5.64	cp	BRD-K14693417	cinchonine	P-glycoprotein inhibitor		CYP2D6	P-glycoprotein inhibitor
2993	5.6	cp	BRD-K51485625	ritonavir	HIV protease inhibitor		CYP3A4, CYP1A2, CYP2B6, CYP2C19, CYP3A5, CYP3A7	HIV protease inhibitor
2995	5.5	cp	BRD-K82147103	lofepramine	Norepinephrine reuptake inhibitor		SLC6A2, SLC6A4	Norepinephrine reuptake inhibitor, Serotonin reuptake inhibitor
2998	5.37	cp	BRD-A54845972	dihydroergotamine	Serotonin receptor agonist		HTR1D, HTR1B, ADRA2A, DRD2, HTR1E, HTR1F, HTR2B, HTR7	Serotonin receptor agonist
3000	5.24	cp	BRD-K04887706	AKT-inhibitor-1-2	AKT inhibitor		AKT1, AKT2, AKT3	AKT inhibitor
3001	5.22	cp	BRD-A14208071	oxyphenonium	Cholinergic receptor antagonist		CHRM1	Cholinergic receptor antagonist
3002	5.2	cp	BRD-K99922388	DPO-1	Potassium channel blocker		KCNA5	Potassium channel blocker
3003	5.12	cp	BRD-K42142750	retrorsine	Antimitotic			Antimitotic, Cytotoxic agent, Mutagenic
3010	4.74	cp	BRD-K80639402	SB-258585	Serotonin receptor antagonist		HTR6	Serotonin receptor antagonist
3013	4.54	cp	BRD-A29485665	bicalutamide	Androgen receptor antagonist		AR, CYP2C19	Androgen receptor antagonist
3014	4.47	cp	BRD-K40892394	AR-C133057XX	Nitric oxide synthase inhibitor		NOS2, NOS1	Nitric oxide synthase inhibitor
3015	4.33	cp	BRD-K96134740	kitasamycin	Protein synthesis inhibitor			Protein synthesis inhibitor
3023	3.69	cp	BRD-K04414442	SB-222200	Tachykinin antagonist		TACR3	Tachykinin antagonist
3024	3.58	cp	BRD-A41941932	vitexin	Antioxidant			Antioxidant
3025	3.48	cp	BRD-K65285700	BRD-K65285700	Cannabinoid receptor agonist		CNR2	Cannabinoid receptor agonist
3027	2.96	cp	BRD-A93206962	L-755507	Adrenergic receptor agonist		ADRB3, ADRB1, ADRB2	Adrenergic receptor agonist
3033	2.22	cp	BRD-A02176148	tubaic-acid	Mitochondrial complex I inhibitor		MT-ND1	Mitochondrial complex I inhibitor, NADH-ubiquinone oxidoreductase (Complex I) inhibitor
3036	0.78	cp	BRD-A16694057	bisphenol-a	PPAR receptor antagonist		AR, ESR2, ESRRG, PPARG	PPAR receptor antagonist
3038	-1.76	cp	BRD-K09963420	saquinavir	HIV protease inhibitor		CYP3A4, CYP3A5	HIV protease inhibitor
3040	-2.04	cp	BRD-K89125793	tinidazole	Antiprotozoal			Antiprotozoal
3047	-2.61	cp	BRD-A68888262	azelastine	Histamine receptor antagonist		HRH1, CYP2C19	Histamine receptor antagonist
3051	-2.78	cp	BRD-K60060639	methyllidocaine	antiarrhythmic medication			antiarrhythmic medication
3055	-3.26	cp	BRD-K26117720	gingerol	Nitric oxide synthase inhibitor			Nitric oxide synthase inhibitor
3057	-3.49	cp	BRD-A98431941	ephedrine	Adrenergic receptor agonist		ACHE, ADRA1A, ADRB2, SLC18A2, SLC6A2	Adrenergic receptor agonist
3066	-4.13	cp	BRD-A24381660	zeranol	Estrogen receptor agonist			Estrogen receptor agonist
3067	-4.2	cp	BRD-K33193182	methylnorlichexanthone	Aurora kinase inhibitor		AURKB, KDR, PIM1	Aurora kinase inhibitor, PIM inhibitor, VEGFR inhibitor
3068	-4.23	cp	BRD-K60298136	ITE	Aryl hydrocarbon receptor agonist		AHR	Aryl hydrocarbon receptor agonist
3069	-4.25	cp	BRD-K77171813	proxyfan	Histamine receptor modulator		HRH3	Histamine receptor modulator
3074	-4.47	cp	BRD-A91008255	bepridil	Calcium channel blocker		ATP1A1, CACNA1A, CACNA1C, CACNA1H, CACNA2D2, CALM1, KCNQ1, KCNQ4, PDE1A, PDE1B, SCN5A, TNNC1	Calcium channel blocker, L-type calcium channel blocker
3075	-4.55	cp	BRD-A37776212	ICI-204448	Opioid receptor agonist		OPRK1	Opioid receptor agonist
3076	-4.58	cp	BRD-K76587808	fraxetin	Antioxidant			Antioxidant
3079	-4.68	cp	BRD-K47780086	penciclovir	DNA directed DNA polymerase inhibitor			DNA directed DNA polymerase inhibitor
3086	-4.83	cp	BRD-K89402695	L-655240	Thromboxane receptor antagonist		PTGES	Thromboxane receptor antagonist
3088	-4.86	cp	BRD-K37080523	isoreserpine	Vesicular monoamine transporter inhibitor		SLC18A2, SLC18A1, SIAH1	Vesicular monoamine transporter inhibitor
3098	-5.02	cp	BRD-A09094913	strychnine	Acetylcholine receptor antagonist		GLRA1, CHRM1, CHRM2, CHRM3, CHRM4, CHRM5, CHRNA10, CHRNA9, GLRA2, GLRA3, GLRB	Acetylcholine receptor antagonist
3103	-5.36	cp	BRD-K00532621	midazolam	Benzodiazepine receptor agonist		CYP3A5, CYP3A7, GABRA1, GABRA2, GABRA3, GABRA4, GABRA5, GABRA6, GABRB1, GABRB2, GABRB3, GABRD, GABRE, GABRG1, GABRG2, GABRG3, GABRP, GABRQ, GABRR1, GABRR2, GABRR3	Benzodiazepine receptor agonist
3104	-5.36	cp	BRD-K09471561	levofloxacin	Bacterial DNA gyrase inhibitor		TOP2A	Bacterial DNA gyrase inhibitor
3105	-5.38	cp	BRD-K49668410	clarithromycin	Bacterial 50S ribosomal subunit inhibitor		CYP2C19, CYP3A4, CYP3A5, CYP3A7	Bacterial 50S ribosomal subunit inhibitor
3107	-5.48	cp	BRD-K77771411	moxonidine	Imidazoline receptor agonist		NISCH, ADRA2A, ADRA2B, ADRA2C	Imidazoline receptor agonist
3109	-5.6	cp	BRD-K32645441	dipropyl-5ct	Serotonin receptor agonist		HTR1B, HTR1D, HTR1F, HTR7	Serotonin receptor agonist
3120	-6.14	cp	BRD-A92630576	trimebutine	Opioid receptor agonist		CHRM1, CHRM2, CHRM3, CHRM4	Opioid receptor agonist
3125	-6.23	cp	BRD-K29530284	amlexanox	Histamine receptor modulator		FGF1, IL3, S100A12, S100A13	Histamine receptor modulator
3135	-6.45	cp	BRD-K94832621	Y-134	Estrogen receptor antagonist		ESR1, ESR2	Estrogen receptor antagonist
3136	-6.45	cp	BRD-K96144918	mead-acid	KPL-1 tumor suppressor			KPL-1 tumor suppressor
3147	-6.87	cp	BRD-A05186015	bupropion	Dopamine uptake inhibitor		SLC6A2, SLC6A3, CHRNA3, CYP2B6	Dopamine uptake inhibitor
3157	-7.03	cp	BRD-A91866971	SQ-29548	Thromboxane receptor antagonist			Thromboxane receptor antagonist
3158	-7.03	cp	BRD-K93188295	ARC-239	Adrenergic receptor antagonist		ADRA2B, ADRA2A, ADRA2C	Adrenergic receptor antagonist
3159	-7.07	cp	BRD-A09828896	SKF-81297	Dopamine receptor agonist		DRD1, DRD5	Dopamine receptor agonist
3161	-7.09	cp	BRD-K04993501	cefixime	Bacterial cell wall synthesis inhibitor			Bacterial cell wall synthesis inhibitor
3168	-7.33	cp	BRD-K28863208	PNU-282987	Cholinergic receptor agonist		CHRNA7	Cholinergic receptor agonist
3174	-7.54	cp	BRD-K38903228	hesperidin	Flavanone glycoside		CACNA1B	Flavanone glycoside
3178	-7.68	cp	BRD-A70649075	sulconazole	Sterol demethylase inhibitor			Sterol demethylase inhibitor
3183	-7.72	cp	BRD-K92015269	GBR-12783	Dopamine uptake inhibitor			Dopamine uptake inhibitor
3184	-7.73	cp	BRD-K66874953	pifithrin-alpha	TP53 inhibitor		TP53	TP53 inhibitor
3189	-7.89	cp	BRD-A10303790	talampicillin	Bacterial cell wall synthesis inhibitor			Bacterial cell wall synthesis inhibitor
3196	-8.02	cp	BRD-K69932463	AZD-8055	MTOR inhibitor		MTOR	MTOR inhibitor
3203	-8.15	cp	BRD-K82357231	desloratadine	Histamine receptor antagonist		HRH1	Histamine receptor antagonist
3206	-8.16	cp	BRD-K71499074	diclofenamide	Carbonic anhydrase inhibitor		CA1, CA2, CA4, CA12, CA7	Carbonic anhydrase inhibitor
3210	-8.18	cp	BRD-K86204871	terconazole	Sterol demethylase inhibitor			Sterol demethylase inhibitor
3212	-8.26	cp	BRD-K33860217	CP-94253	Serotonin receptor agonist		HTR1B	Serotonin receptor agonist
3213	-8.26	cp	BRD-A50764878	MDL-73005EF	Serotonin receptor antagonist		HTR1A	Serotonin receptor antagonist
3214	-8.27	cp	BRD-A14395271	mesoridazine	Dopamine receptor antagonist		DRD2, HTR2A	Dopamine receptor antagonist
3222	-8.37	cp	BRD-K52080565	rilmenidine	Imidazoline receptor agonist		NISCH	Imidazoline receptor agonist
3225	-8.42	cp	BRD-K96670504	lonidamine	Glucokinase inhibitor		GCK	Glucokinase inhibitor
3229	-8.64	cp	BRD-K48367671	febuxostat	Xanthine oxidase inhibitor		XDH	Xanthine oxidase inhibitor
3232	-8.69	cp	BRD-A85587465	bemesetron	Serotonin receptor antagonist		HTR3A, HTR3B	Serotonin receptor antagonist
3234	-8.79	cp	BRD-K53979406	ALX-5407	Glycine transporter inhibitor		SLC6A9	Glycine transporter inhibitor
3236	-8.8	cp	BRD-K85030058	benactyzine	Acetylcholine receptor antagonist			Acetylcholine receptor antagonist
3251	-9.11	cp	BRD-A71203467	l-stepholidine	Dopamine receptor antagonist		DRD2, DRD1	Dopamine receptor antagonist
3253	-9.19	cp	BRD-K25310650	ormetoprim	Bacterial antifolate			Bacterial antifolate
3261	-9.31	cp	BRD-K08973992	linoleic-acid	Oxidative stress inducer		FABP4, FFAR1, FFAR4, HNF4A, KCNB1, PPARG, TRPM8	Oxidative stress inducer
3267	-9.47	cp	BRD-A82238138	budesonide	Glucocorticoid receptor agonist		NR3C1, CYP3A5, CYP3A7	Glucocorticoid receptor agonist
3272	-9.53	cp	BRD-A50928468	norgestrel	Progesterone receptor agonist		CYP2E1, PGR	Progesterone receptor agonist
3275	-9.6	cp	BRD-K05737787	isoeugenol	Nitric oxide production inhibitor			Nitric oxide production inhibitor
3278	-9.63	cp	BRD-A65076780	dihydroergocristine	Adrenergic receptor antagonist		HTR2A, ADRA1A, ADRB1, DRD1, DRD2, DRD3, DRD4, DRD5, HTR1A, HTR3A, HTR4, HTR5A, HTR6, HTR7	Adrenergic receptor antagonist, Prolactin inhibitor
3279	-9.63	cp	BRD-K85090592	pilocarpine	Acetylcholine receptor agonist		CHRM3, CHRM1, CHRM2, CHRM4, CHRM5	Acetylcholine receptor agonist
3280	-9.63	cp	BRD-K67637637	olopatadine	Histamine receptor antagonist		HRH1, S100A1, S100A12, S100A13, S100A2, S100B	Histamine receptor antagonist
3288	-9.76	cp	BRD-K88304388	dextrorphan	Glutamate receptor antagonist		OPRM1, OPRK1, OPRD1, GRIN1, HTR1A, SLC6A2	Glutamate receptor antagonist
3291	-9.8	cp	BRD-K64994968	progesterone	Progesterone receptor agonist		PGR, CYP17A1, NR3C2, CATSPER1, CATSPER2, CATSPER3, CATSPER4, CYP2C19, ESR1, OPRK1, TRPC5	Progesterone receptor agonist
3296	-9.89	cp	BRD-A44133049	azasetron	Serotonin receptor antagonist		HTR3A, HTR3B	Serotonin receptor antagonist
3297	-9.89	cp	BRD-K06014311	DH-97	Melatonin receptor antagonist		MTNR1B	Melatonin receptor antagonist
3298	-9.9	cp	BRD-A11678676	wortmannin	PI3K inhibitor		PIK3CA, PIK3CG, PLK1, ATM, ATR, MTOR, PI4KA, PI4KB, PIK3CD, PIK3R1, PLK3, PRKDC	PI3K inhibitor
3310	-10.09	cp	BRD-K56301217	ABT-737	BCL inhibitor		BCL2, BCL2L1, BCL2L2	BCL inhibitor
3311	-10.1	cp	BRD-K39391626	ethylestrenol	Progesterone receptor agonist		AR	Progesterone receptor agonist
3318	-10.19	cp	BRD-K01555864	dibenzoylmethane	Antineoplastic			Antineoplastic
3320	-10.24	cp	BRD-K54771420	glycocholic-acid	Cholesterol inhibitor		FABP6	Cholesterol inhibitor
3321	-10.29	cp	BRD-K71534238	GW-9508	Free fatty acid receptor agonist		FFAR4, FFAR1	Free fatty acid receptor agonist, G protein-coupled receptor agonist
3322	-10.3	cp	BRD-K42679050	Y-27152	Potassium channel activator		ABCC9, KCNJ8	Potassium channel activator
3328	-10.39	cp	BRD-A66199457	asiaticoside	Antineoplastic			Antineoplastic
3333	-10.55	cp	BRD-A07765530	epinephrine	carbonic anhydrase activator		ADRA1A, ADRA1B, ADRA1D, ADRA2A, ADRA2B, ADRA2C, ADRB1, ADRB2, ADRB3, PAH, TNF	carbonic anhydrase activator
3335	-10.6	cp	BRD-K93480852	KN-93	Calcium-calmodulin dependent protein kinase inhibitor		CAMK2A	Calcium-calmodulin dependent protein kinase inhibitor
3336	-10.6	cp	BRD-K69600043	thiethylperazine	Dopamine receptor antagonist		DRD1, DRD2, DRD4	Dopamine receptor antagonist
3339	-10.69	cp	BRD-K68867920	quetiapine	Dopamine receptor antagonist		DRD2, HTR1A, HTR2A, DRD1, HRH1, HTR1D, HTR1E, ADRA1A, ADRA1B, ADRA1D, ADRA2A, ADRA2B, ADRA2C, CHRM1, CHRM2, CHRM3, CHRM4, CHRM5, DRD3, DRD4, DRD5, HTR1B, HTR1F, HTR2C, HTR3A, HTR6, HTR7, SLC6A2	Dopamine receptor antagonist, Serotonin receptor antagonist
3345	-10.81	cp	BRD-K55454768	TAS-301	Calcium-calmodulin dependent protein kinase inhibitor		CAMK2A	Calcium-calmodulin dependent protein kinase inhibitor
3352	-10.89	cp	BRD-K33459542	ditolylguanidine	Sigma receptor agonist		GRIN1, GRIN2A, GRIN2B, SIGMAR1	Sigma receptor agonist
3371	-11.22	cp	BRD-A75402480	desoxycorticosterone	Mineralocorticoid receptor agonist			Mineralocorticoid receptor agonist
3374	-11.28	cp	BRD-K56429665	calcipotriol	Vitamin D receptor agonist		VDR	Vitamin D receptor agonist
3375	-11.29	cp	BRD-K99595596	salsolinol	Monoamine oxidase inhibitor		DRD2	Monoamine oxidase inhibitor, Tyrosine hydroxylase inhibitor
3393	-11.55	cp	BRD-A66563878	medetomidine	Adrenergic receptor agonist		ADRA2A, ADRA2B, ADRA2C, ADRA1A, ADRA1B, ADRA1D	Adrenergic receptor agonist
3400	-11.74	cp	BRD-K63979671	etifenin	Compound used in hepatobiliary scans of the liver			Compound used in hepatobiliary scans of the liver
3424	-12.16	cp	BRD-A72483914	spiroxatrine	Serotonin receptor antagonist		HTR1A, ADRA1A, ADRA1B, ADRA1D, ADRA2A, ADRA2B, ADRA2C, HTR2B	Serotonin receptor antagonist
3426	-12.17	cp	BRD-K47207162	zimelidine	Serotonin reuptake inhibitor		SLC6A4, MAOA, MAOB	Serotonin reuptake inhibitor
3450	-12.62	cp	BRD-K82091397	SB-239063	p38 MAPK inhibitor		MAPK11, MAPK14, PTGS2, TNF	p38 MAPK inhibitor
3451	-12.62	cp	BRD-A27489425	rolitetracycline	Bacterial 30S ribosomal subunit inhibitor			Bacterial 30S ribosomal subunit inhibitor
3452	-12.65	cp	BRD-A24543851	nornicotine	Acetylcholine receptor agonist			Acetylcholine receptor agonist
3455	-12.72	cp	BRD-A68589262	troxipide	Glucosamine synthetase stimulant			Glucosamine synthetase stimulant
3470	-12.9	cp	BRD-A73741725	exemestane	Aromatase inhibitor		CYP19A1	Aromatase inhibitor
3472	-12.92	cp	BRD-K16977723	PP-3	EGFR inhibitor			EGFR inhibitor
3476	-12.96	cp	BRD-K05906022	limonin	HIV protease inhibitor			HIV protease inhibitor
3489	-13.16	cp	BRD-K06467078	corynanthine	Adrenergic receptor antagonist			Adrenergic receptor antagonist
3499	-13.22	cp	BRD-K56064827	EI-273	PKC inhibitor		PRKCA, PRKCG	PKC inhibitor
3501	-13.23	cp	BRD-K37130656	rivaroxaban	Coagulation inhibitor		F10, CYP2J2, CYP3A5	Coagulation inhibitor
3505	-13.27	cp	BRD-A65615053	zacopride	Serotonin receptor antagonist		HTR3A, HTR4, HTR3B, HTR5A	Serotonin receptor antagonist
3508	-13.3	cp	BRD-K44442813	pidotimod	Interferon receptor agonist			Interferon receptor agonist, Interleukin receptor agonist
3517	-13.52	cp	BRD-K67783091	haloperidol	Dopamine receptor antagonist		DRD2, DRD1, DRD3, HTR2A, CYP3A7, DRD4, DRD5, GRIN2B, HRH1, HTR1A, HTR1D, HTR2B, HTR7, KCNH1	Dopamine receptor antagonist, Psychoactive drug
3528	-13.74	cp	BRD-K43290182	Ro-04-6790	Serotonin receptor antagonist		HTR6	Serotonin receptor antagonist
3536	-13.85	cp	BRD-K75181824	acetyl-geranygeranyl-cysteine	Inhibitor of methyl esterification of geranylgeranylated proteins			Inhibitor of methyl esterification of geranylgeranylated proteins
3538	-13.86	cp	BRD-A64977602	mirtazapine	Adrenergic receptor antagonist		ADRA2A, HTR2A, HTR2C, ADRA2C, HTR3A, ADRA1A, ADRA1B, ADRA1D, ADRA2B, ADRB1, ADRB2, DRD1, DRD2, DRD3, DRD5, HRH1, HRH3, HTR2B, HTR7, OPRK1, SLC6A2, SLC6A3, SLC6A4	Adrenergic receptor antagonist, Serotonin receptor antagonist
3540	-13.89	cp	BRD-K39621635	artemether	Antimalarial		ATP1A1, CYP2B6, CYP2C19, CYP3A5	Antimalarial
3544	-13.97	cp	BRD-K55748775	SCH-28080	ATPase inhibitor		ATP4A	ATPase inhibitor
3545	-14.04	cp	BRD-A35033682	eriodictyol	Cytochrome P450 inhibitor		CYP1B1, NFE2L2, XDH	Cytochrome P450 inhibitor
3546	-14.05	cp	BRD-A67862938	naftidrofuryl	Adrenergic receptor antagonist			Adrenergic receptor antagonist
3547	-14.07	cp	BRD-K83063356	RS-102895	CCR antagonist		CCR2	CCR antagonist
3558	-14.22	cp	BRD-K48932581	cetraxate	Mucus protecting agent		GAST	Mucus protecting agent
3563	-14.26	cp	BRD-K34533029	tyrphostin-AG-494	EGFR inhibitor		EGFR	EGFR inhibitor
3565	-14.29	cp	BRD-K84266862	BRL-50481	Phosphodiesterase inhibitor		PDE7A, PDE7B	Phosphodiesterase inhibitor
3566	-14.29	cp	BRD-A77291778	cyclopentolate	Acetylcholine receptor antagonist		CHRM1	Acetylcholine receptor antagonist
3570	-14.32	cp	BRD-A67373739	AICA-ribonucleotide	AMPK activator		ATIC, PRKAA1	AMPK activator
3580	-14.53	cp	BRD-K35629949	SR-27897	CCK receptor antagonist		CCKAR	CCK receptor antagonist
3586	-14.6	cp	BRD-K72541103	JAK3-inhibitor-I	JAK inhibitor		JAK3	JAK inhibitor
3588	-14.67	cp	BRD-K45446451	JZL-184	Monoacylglucerol lipase inhibitor		MGLL	Monoacylglucerol lipase inhibitor
3603	-14.91	cp	BRD-K68190965	GR-46611	Serotonin receptor agonist		HTR1D	Serotonin receptor agonist
3610	-15	cp	BRD-A41995253	brucine	Glycine receptor antagonist		CHRM1, CHRM2, CHRM3, CHRM4, CHRM5	Glycine receptor antagonist
3614	-15.04	cp	BRD-K59332007	linopirdine	Potassium channel blocker		KCNQ2, KCNQ3, KCNQ4, KCNQ5	Potassium channel blocker
3616	-15.07	cp	BRD-K07220430	cinnarizine	Calcium channel blocker		HRH1, CACNA1C, CACNA1D, CACNA1F, CACNA1G, CACNA1H, CACNA1I, CACNA1S, CHRM1, CHRM2, CHRM3, CHRM4, CHRM5, DRD1, DRD2, DRD5	Calcium channel blocker
3629	-15.36	cp	BRD-K20141153	atomoxetine	Norepinephrine transporter inhibitor		SLC6A2, SLC6A3, SLC6A4, GRIN1, GRIN2A, GRIN2B, GRIN2C, GRIN2D, GRIN3A, GRIN3B	Norepinephrine transporter inhibitor
3632	-15.41	cp	BRD-K18678457	ZD-7288	HCN channel blocker		HCN1, HCN2, HCN3, HCN4	HCN channel blocker
3633	-15.42	cp	BRD-A34205397	suloctidil	Adrenergic receptor antagonist			Adrenergic receptor antagonist
3635	-15.43	cp	BRD-K92723993	imatinib	BCR-ABL kinase inhibitor		ABL1, KIT, PDGFRA, BCR, CSF1R, PDGFRB, ABCG2, CYP2C19, CYP2C8, CYP3A5, DDR1, NTRK1, RET	BCR-ABL kinase inhibitor, KIT inhibitor, PDGFR receptor inhibitor
3642	-15.57	cp	BRD-K72783841	tyrphostin-AG-555	EGFR inhibitor		CDK2, EGFR	EGFR inhibitor
3646	-15.62	cp	BRD-K55591206	epigallocatechin	Nitric oxide synthase inhibitor		FASN, APP, BACE1, CYP19A1, DYRK1A, ELANE, ENOX2, EP300, IDO1, KAT2B, KDR, MMP14, MMP2, PPARA, PREP, SLC5A1	Nitric oxide synthase inhibitor, Bacterial DNA gyrase inhibitor
3647	-15.63	cp	BRD-K88868628	iodoacetic-acid	Cysteine peptidase inhibitor			Cysteine peptidase inhibitor
3648	-15.65	cp	BRD-K86434416	selegiline	Monoamine oxidase inhibitor		MAOB, MAOA, CYP2B6, CYP2C19	Monoamine oxidase inhibitor
3653	-15.8	cp	BRD-A49370193	RO-60-0175	Serotonin receptor agonist		HTR2C, HTR2A, HTR2B	Serotonin receptor agonist
3662	-15.91	cp	BRD-K30240666	clemastine	Histamine receptor antagonist		HRH1	Histamine receptor antagonist
3664	-15.92	cp	BRD-K12357156	AG-490	EGFR inhibitor		JAK2, JAK3, EGFR, STAT3	EGFR inhibitor, ErbB2 inhibitor, JAK inhibitor
3666	-15.94	cp	BRD-K97354755	SU-6656	SRC inhibitor		LYN, AURKB, AURKC, BRSK2, CALM1, CAMK2D, LCK, RET, SRC, YES1	SRC inhibitor
3669	-15.98	cp	BRD-A79314293	cephalosporanic-acid	Bacterial cell wall synthesis inhibitor			Bacterial cell wall synthesis inhibitor
3672	-16	cp	BRD-K78373679	RO-3306	CDK inhibitor		CDK1	CDK inhibitor
3674	-16.05	cp	BRD-K72903603	zidovudine	Reverse transcriptase inhibitor		TERT	Reverse transcriptase inhibitor
3681	-16.11	cp	BRD-A33084410	5'-guanidinonaltrindole	Opioid receptor antagonist			Opioid receptor antagonist
3691	-16.34	cp	BRD-A68723818	brompheniramine	Histamine receptor antagonist		HRH1, CHRM1, CHRM2, CHRM3, CHRM4, CHRM5	Histamine receptor antagonist
3693	-16.39	cp	BRD-A43974499	reboxetine	Adrenergic receptor antagonist		SLC6A2	Adrenergic receptor antagonist
3702	-16.5	cp	BRD-K12932420	YM-976	Phosphodiesterase inhibitor		PDE4A, PDE4B, PDE4C, PDE4D, TNF	Phosphodiesterase inhibitor
3709	-16.57	cp	BRD-K93461745	buspirone	Serotonin receptor agonist		HTR1A, DRD2	Serotonin receptor agonist
3714	-16.67	cp	BRD-K56558538	ambroxol	Sodium channel blocker		GBA	Sodium channel blocker
3715	-16.68	cp	BRD-K90789829	nefazodone	Adrenergic inhibitor		HTR2A, SLC6A4, HTR2C, SLC6A2, ADRA1A, ADRA1B, ADRA2A, CYP3A4, CYP3A5, CYP3A7, HTR1A, SLC6A3	Adrenergic inhibitor, Norepinephrine reuptake inhibitor, Serotonin receptor antagonist, Serotonin reuptake inhibitor
3720	-16.74	cp	BRD-A87125127	3-matida	Glutamate receptor antagonist		GRM1	Glutamate receptor antagonist
3722	-16.76	cp	BRD-K63151507	MNITMT	Lymphocyte inhibitor			Lymphocyte inhibitor
3723	-16.77	cp	BRD-A49734948	foliosidine	Plant alkaloid			Plant alkaloid
3729	-16.82	cp	BRD-K83963101	MLN-8054	Aurora kinase inhibitor		AURKA	Aurora kinase inhibitor, Mitotic inhibitor, Protein kinase inhibitor
3730	-16.85	cp	BRD-K87048468	RS-102221	Serotonin receptor antagonist		HTR2C, HTR2A, HTR2B	Serotonin receptor antagonist
3734	-16.95	cp	BRD-K06543683	bisindolylmaleimide-ix	CDK inhibitor		SIRT1, AKT1, GSK3B, LCK, LRRK2, MAPK1, MAPK11, MAPK12, MAPK14, MAPK8, PRKCA, ROCK1, RPS6KB1, SIRT2	CDK inhibitor, PKC inhibitor
3736	-17.05	cp	BRD-A36066264	estradiol-benzoate	Estrogen receptor agonist		ESR1	Estrogen receptor agonist
3738	-17.06	cp	BRD-K59753853	MDL-29951	Glutamate receptor antagonist		FBP1, GPR17	Glutamate receptor antagonist
3748	-17.22	cp	BRD-K86958018	olvanil	TRPV agonist		TRPV1, CNR1, GPR119	TRPV agonist
3749	-17.22	cp	BRD-K74195153	irsogladine	Phosphodiesterase inhibitor		PDE4A	Phosphodiesterase inhibitor
3753	-17.26	cp	BRD-K51223576	AG-99	Tyrosine kinase inhibitor		EGFR	Tyrosine kinase inhibitor
3756	-17.29	cp	BRD-K50464341	berbamine	Calmodulin antagonist		CALM1	Calmodulin antagonist
3757	-17.31	cp	BRD-A24122750	saclofen	GABA receptor antagonist		GABBR1, GABBR2, KCTD12, KCTD16, KCTD8	GABA receptor antagonist
3761	-17.42	cp	BRD-A56245458	reichstein	Androgen receptor antagonist		AR	Androgen receptor antagonist
3769	-17.54	cp	BRD-K87991767	umbelliferone	Cyclooxygenase inhibitor		CA9, CA12, PTGS2	Cyclooxygenase inhibitor
3770	-17.55	cp	BRD-A02189320	met-leu-phe	-666			-666
3777	-17.61	cp	BRD-K08132273	tyrphostin	EGFR inhibitor		ERBB2	EGFR inhibitor
3780	-17.66	cp	BRD-K68620903	dydrogesterone	Progesterone receptor agonist		PGR	Progesterone receptor agonist
3783	-17.74	cp	BRD-K34330170	rotenonic-acid	Retinoid receptor antagonist			Retinoid receptor antagonist
3786	-17.77	cp	BRD-K77925998	quipazine	Serotonin receptor agonist		HTR2A, HTR3A, HTR3B, HTR1A, HTR1D, HTR2B, HTR2C, HTR6, SLC6A4	Serotonin receptor agonist
3790	-17.86	cp	BRD-K19894101	MST-312	Telomerase inhibitor		TERT	Telomerase inhibitor
3795	-17.96	cp	BRD-A71262238	nafadotride	Dopamine receptor antagonist		DRD3, DRD2, HTR1A	Dopamine receptor antagonist
3796	-17.99	cp	BRD-K25394294	oxaprozin	Cyclooxygenase inhibitor		PTGS1, PTGS2	Cyclooxygenase inhibitor
3800	-18.02	cp	BRD-K83144676	olmesartan	Angiotensin antagonist		AGTR1	Angiotensin antagonist
3801	-18.02	cp	BRD-K18909381	CGS-12066B	Serotonin receptor agonist		HTR1B, HTR1A, HTR1D, HTR2A, HTR2B, HTR2C	Serotonin receptor agonist
3805	-18.06	cp	BRD-K18816859	L-694247	Serotonin receptor agonist		HTR1D, HTR1A, HTR1B	Serotonin receptor agonist
3807	-18.1	cp	BRD-K73196317	urapidil	Adrenergic receptor antagonist		HTR1A	Adrenergic receptor antagonist
3814	-18.18	cp	BRD-K31843556	T-0070907	PPAR receptor antagonist		PPARG	PPAR receptor antagonist
3817	-18.2	cp	BRD-K27499107	carbacyclin	IP receptor activator		PPARD, PTGDR, PTGER1, PTGER2, PTGER3, PTGER4, PTGFR, PTGIR, TBXA2R	IP receptor activator, PPAR receptor agonist
3819	-18.25	cp	BRD-K50836978	purvalanol-a	CDK inhibitor		CDK1, CDK2, CDK4, CDK5, CCND1, CCNE1, CSNK1G3, RPS6KA1, SRC	CDK inhibitor, DYRK inhibitor
3824	-18.29	cp	BRD-K73589401	corticosterone	mineralocorticoid receptor agonist		HSD11B1, NR3C2, NCOA1	mineralocorticoid receptor agonist
3827	-18.32	cp	BRD-K67017579	cilostazol	Phosphodiesterase inhibitor		PDE3A, CYP2C19, CYP3A5, PDE3B	Phosphodiesterase inhibitor
3829	-18.36	cp	BRD-A78877355	nefopam	Cyclooxygenase inhibitor			Cyclooxygenase inhibitor
3839	-18.55	cp	BRD-K64614248	salicin	Anti-inflammatory			Anti-inflammatory
3844	-18.6	cp	BRD-K93441486	diphemanil	Acetylcholine receptor antagonist		CHRM3	Acetylcholine receptor antagonist
3845	-18.61	cp	BRD-K92758126	gibberellic-acid	NFkB pathway inhibitor		AADACL2	NFkB pathway inhibitor
3847	-18.62	cp	BRD-K49671696	ketanserin	Serotonin receptor antagonist		HTR2A, HTR2C, ADRA1A, ADRA1B, ADRA1D, DRD1, DRD5, HTR1A, HTR1B, HTR1D, HTR2B, HTR5A, HTR7, SLC18A1, SLC18A2	Serotonin receptor antagonist
3850	-18.65	cp	BRD-A42346008	metanephrine	Epinephrine metabolite			Epinephrine metabolite
3853	-18.71	cp	BRD-K51662849	ilomastat	Matrix metalloprotease inhibitor		ACAN, ADAM28, MMP1, MMP12, MMP13, MMP14, MMP2, MMP3, MMP8, MMP9	Matrix metalloprotease inhibitor
3856	-18.74	cp	BRD-A41833852	naloxone	Opioid receptor antagonist		OPRM1, OPRK1, OPRD1, CREB1, ESR1, TLR4	Opioid receptor antagonist
3860	-18.85	cp	BRD-A37347161	BRL-52537	Opioid receptor agonist		OPRK1	Opioid receptor agonist
3863	-18.89	cp	BRD-K06221026	DUP-697	Cyclooxygenase inhibitor		PTGS2	Cyclooxygenase inhibitor
3871	-19.02	cp	BRD-A60197193	amisulpride	Dopamine receptor antagonist		DRD2, DRD3, HTR2A, HTR7	Dopamine receptor antagonist
3872	-19.03	cp	BRD-A24817035	laudanosine	Central nervous system agent			Central nervous system agent
3876	-19.09	cp	BRD-K44353683	nateglinide	Insulin secretagogue		ABCC8, KCNJ11, CYP3A4, INS, KCNJ10, PPARG	Insulin secretagogue
3880	-19.14	cp	BRD-K64800655	PHA-793887	CDK inhibitor		CDK1, CDK2, CDK4, CDK5, CCND1, CCNE1, CDK7, CDK9	CDK inhibitor
3886	-19.21	cp	BRD-K40919711	BAPTA-AM	Potassium channel blocker		KCNA3, KCNA5, KCNH2	Potassium channel blocker
3887	-19.27	cp	BRD-K74765201	tomelukast	Leukotriene receptor antagonist		CYSLTR1	Leukotriene receptor antagonist
3889	-19.29	cp	BRD-K44876623	zolpidem	Benzodiazepine receptor agonist		GABRA1, GABRA2, GABRA3	Benzodiazepine receptor agonist
3894	-19.39	cp	BRD-K29178788	dictamnine	Furoquinoline alkaloid			Furoquinoline alkaloid
3899	-19.45	cp	BRD-K54210043	NS-1619	Calcium channel activator		KCNMA1, KCNT1, KCNT2, KCNU1	Calcium channel activator
3900	-19.46	cp	BRD-A11605036	thiocolchicoside	GABA receptor antagonist		GABRA1, GABRB2, GABRG2, GLRA1, GLRB	GABA receptor antagonist
3904	-19.55	cp	BRD-K81876028	CP-93129	Serotonin receptor agonist		HTR1A, HTR1B	Serotonin receptor agonist
3906	-19.56	cp	BRD-K93095519	SJ-172550	MDM inhibitor		MDM4	MDM inhibitor
3907	-19.56	cp	BRD-A58157837	butabindide	Tripeptidyl peptidase inhibitor		TPP2	Tripeptidyl peptidase inhibitor
3913	-19.69	cp	BRD-K15108141	gemcitabine	Ribonucleotide reductase inhibitor		RRM1, CMPK1, RRM2, TYMS	Ribonucleotide reductase inhibitor
3916	-19.71	cp	BRD-K94920105	DR-2313	PARP inhibitor		PARP1, PARP3	PARP inhibitor
3922	-19.8	cp	BRD-K84639753	safinamide	Dopamine uptake inhibitor		MAOB, SLC6A3	Dopamine uptake inhibitor, Glutamate inhibitor, Monoamine oxidase inhibitor
3923	-19.8	cp	BRD-K14920963	erythrosine	Coloring agent			Coloring agent
3931	-19.89	cp	BRD-K78637815	LY-320135	Cannabinoid receptor antagonist		CNR1	Cannabinoid receptor antagonist
3933	-19.9	cp	BRD-K10042277	desmethylclozapine	Acetylcholine receptor agonist		CHRM1, DRD2, DRD3, HTR2A	Acetylcholine receptor agonist
3935	-20.01	cp	BRD-A41451487	PK-11195	Benzodiazepine receptor antagonist		TSPO, NR1I2, NR1I3	Benzodiazepine receptor antagonist
3938	-20.06	cp	BRD-K06024458	n-arachidonyl-GABA	cannabinoid receptor agonist			cannabinoid receptor agonist
3943	-20.17	cp	BRD-A96882008	L-732138	Tachykinin antagonist		TACR1, TACR2	Tachykinin antagonist
3944	-20.21	cp	BRD-A61856038	tremulacin	Lipoxygenase inhibitor			Lipoxygenase inhibitor
3950	-20.29	cp	BRD-K17294426	clebopride	Dopamine receptor antagonist		DRD2, ACHE	Dopamine receptor antagonist
3951	-20.29	cp	BRD-K32836707	CAY-10577	Casein kinase inhibitor			Casein kinase inhibitor
3956	-20.34	cp	BRD-A39268308	epibatidine	Acetylcholine receptor agonist		CHRFAM7A, CHRNA2, CHRNA3, CHRNA4, CHRNA7	Acetylcholine receptor agonist
3957	-20.35	cp	BRD-A70514680	articaine	Local anesthetic			Local anesthetic
3961	-20.37	cp	BRD-K51018020	VAMA-37	DNA dependent protein kinase inhibitor		PRKDC	DNA dependent protein kinase inhibitor
3964	-20.4	cp	BRD-K39915878	loxapine	Dopamine receptor antagonist		DRD2, DRD3, DRD4, DRD1, HRH1, HTR2A, HTR2C, HTR6, ADRA1A, ADRA1B, ADRA2A, ADRA2B, ADRA2C, ADRB1, CHRM1, CHRM2, CHRM3, CHRM4, CHRM5, DRD5, HRH2, HRH4, HTR1A, HTR1B, HTR1D, HTR1E, HTR3A, HTR5A, HTR7, SLC6A2, SLC6A3, SLC6A4	Dopamine receptor antagonist, Dopamine receptor ligand, Serotonin receptor antagonist
3969	-20.5	cp	BRD-K46766488	S-14506	Serotonin receptor agonist		HTR1A, DRD2, HTR2C	Serotonin receptor agonist
3972	-20.52	cp	BRD-K30020243	aliskiren	Antihypertensive		REN	Antihypertensive, Peptidase inhibitor, Protease inhibitor, Renin inhibitor
3975	-20.61	cp	BRD-K47192521	icosapent	Platelet aggregation inhibitor		PTGS1, PTGS2, ACSL3, ACSL4, FADS1, FFAR1, PPARD, PPARG, SLC8A1, TRPV1	Platelet aggregation inhibitor
3983	-20.71	cp	BRD-K38251852	paxilline	Potassium channel blocker		ABCA1, KCNMA1, NR1H3	Potassium channel blocker
3989	-20.76	cp	BRD-A91699651	chloroquine	Antimalarial		CYP2C8, GSTA2, MRGPRX1, TLR9, TNF	Antimalarial
3991	-20.77	cp	BRD-K67080878	milrinone	Phosphodiesterase inhibitor		PDE3A, PDE2A, PDE3B, PDE5A	Phosphodiesterase inhibitor
3994	-20.84	cp	BRD-K23623876	decafluorobutane	Contrast agent		GRM5	Contrast agent
3999	-20.9	cp	BRD-A19633847	perhexiline	Carnitine palmitoyltransferase inhibitor		CPT1A, CPT2	Carnitine palmitoyltransferase inhibitor
4005	-21	cp	BRD-K88611939	aniracetam	Glutamate receptor agonist		DRD2, GRIA1, GRIA2, GRIA3, HTR2A, GRIA4	Glutamate receptor agonist
4008	-21.04	cp	BRD-A94669766	naringenin	Aromatase inhibitor		CYP19A1, ESR2, CYP1B1, GLO1, HSD17B1	Aromatase inhibitor, TRPV antagonist
4009	-21.08	cp	BRD-A43882281	pinacidil	ATP channel activator		ABCC9, KCNJ8	ATP channel activator, Potassium channel activator
4010	-21.08	cp	BRD-A46393198	tetramisole	Immunostimulant			Immunostimulant
4013	-21.14	cp	BRD-K06980535	promazine	Dopamine receptor antagonist		CHRM5, DRD2, ADRA1A, ADRA1B, ADRA1D, CHRM1, CHRM2, CHRM3, CHRM4, DRD1, DRD3, DRD4, HRH1, HTR2A, HTR2C	Dopamine receptor antagonist
4017	-21.16	cp	BRD-A31195449	TCB2	Serotonin receptor agonist		HTR2A	Serotonin receptor agonist
4018	-21.17	cp	BRD-A39290993	cyproterone	Androgen receptor antagonist		AR, ADORA1, ESR1	Androgen receptor antagonist, Progesterone receptor agonist, Testosterone receptor antagonist
4031	-21.43	cp	BRD-K88789588	letrozole	Aromatase inhibitor		CYP19A1	Aromatase inhibitor
4033	-21.44	cp	BRD-K06712146	YM-90709	IL5 inhibitor		CSF2RB, IL5RA	IL5 inhibitor
4037	-21.48	cp	BRD-K22193694	dioxybenzone	Topical sunscreen agent			Topical sunscreen agent
4038	-21.5	cp	BRD-K85871428	SC-68376	p38 MAPK inhibitor		MAPK14	p38 MAPK inhibitor
4041	-21.56	cp	BRD-K45158365	valsartan	Angiotensin receptor antagonist		AGTR1	Angiotensin receptor antagonist
4043	-21.59	cp	BRD-K89210380	biotin	Vitamin B		ACACA, ACACB, HLCS, MCCC1, MCCC2, PC, PCCA, PCCB, SLC5A6	Vitamin B
4046	-21.61	cp	BRD-K67043667	altretamine	DNA synthesis inhibitor			DNA synthesis inhibitor
4049	-21.62	cp	BRD-K87142802	veliparib	PARP inhibitor		PARP1, PARP2	PARP inhibitor
4050	-21.64	cp	BRD-K52735702	cefdinir	Bacterial cell wall synthesis inhibitor		MPO	Bacterial cell wall synthesis inhibitor
4053	-21.68	cp	BRD-K88871508	lisuride	Dopamine receptor agonist		DRD2, HTR2B, HTR2C, ADRA2A, ADRA2B, ADRA2C, DRD1, DRD3, DRD4, DRD5, HTR1A, HTR1B, HTR1D, HTR2A, ADRA1A, HRH1, HTR6	Dopamine receptor agonist
4054	-21.71	cp	BRD-K30990140	FR-122047	Cyclooxygenase inhibitor			Cyclooxygenase inhibitor
4061	-21.78	cp	BRD-K29653726	topiramate	Carbonic anhydrase inhibitor		CA2, CA4, GRIK1, CA1, CA12, CA7, CYP2C19, CYP3A4, GABRA1, GABRA2, GABRA3, GABRA4, GABRA5, GABRA6, GABRB1, GABRB2, GABRB3, GABRD, GABRE, GABRG1, GABRG2, GABRG3, GABRP, GABRQ, GRIA1, SCN1A, SCN5A	Carbonic anhydrase inhibitor, Glutamate receptor antagonist, Kainate receptor antagonist
4075	-21.93	cp	BRD-K28667196	fillalbin	Increases arterial blood pressure			Increases arterial blood pressure
4076	-21.94	cp	BRD-K41051431	mecillinam	Bacterial cell wall synthesis inhibitor			Bacterial cell wall synthesis inhibitor
4079	-21.98	cp	BRD-A26334849	propafenone	Antiarrhythmic		KCNH2, SCN5A, ADRB1, ADRB2, KCNA5, KCNK2, KCNK3	Antiarrhythmic
4082	-22.01	cp	BRD-K92413528	thiazolidinecarboxylic-acid	Reducing agent			Reducing agent
4084	-22.03	cp	BRD-K26160755	RS-45041-190	Imidazoline receptor agonist			Imidazoline receptor agonist
4085	-22.05	cp	BRD-K93332168	isocarboxazid	Monoamine oxidase inhibitor		MAOA, MAOB	Monoamine oxidase inhibitor
4086	-22.05	cp	BRD-K52989797	clomipramine	Serotonin transporter inhibitor (SERT)		SLC6A4, SLC6A2, CYP2C19, GSTP1, HTR2A, HTR2B, HTR2C, SLC6A3	Serotonin transporter inhibitor (SERT)
4090	-22.19	cp	BRD-K43389675	daunorubicin	RNA synthesis inhibitor		TOP2A, TOP2B	RNA synthesis inhibitor, Topoisomerase inhibitor
4092	-22.23	cp	BRD-K20986251	lithocholic-acid	FXR antagonist		NR1I2, VDR, GPBAR1, MDM2, MDM4, NR1H4, PTPN1	FXR antagonist, MDM inhibitor, PXR ligand, Tyrosine phosphatase inhibitor, Vitamin D receptor agonist, Vitamin D receptor ligand
4093	-22.23	cp	BRD-A44780397	mifepristone	Glucocorticoid receptor antagonist		PGR, NR3C1, AR, CYP2B6, CYP2C8, CYP3A5, CYP3A7, NR1I2	Glucocorticoid receptor antagonist, Progesterone receptor antagonist
4098	-22.3	cp	BRD-K04430056	7-nitroindazole	nitric oxide synthase inhibitor		NOS1, NOS2, NOS3	nitric oxide synthase inhibitor
4100	-22.37	cp	BRD-K73999723	telmisartan	Angiotensin receptor antagonist		AGTR1, PPARG, CYP2C19, CYP2J2, PPARA	Angiotensin receptor antagonist
4107	-22.5	cp	BRD-K57179821	crotamiton	Antipruritic			Antipruritic
4114	-22.55	cp	BRD-A27143604	DPN	Estrogen receptor agonist		ESR2	Estrogen receptor agonist
4117	-22.59	cp	BRD-A31204924	mitotane	Antineoplastic		CYP11B1, CYP11A1, CYP3A4, ESR1, FDX1	Antineoplastic
4120	-22.68	cp	BRD-A96897502	U-74389F	Lipid peroxidase inhibitor			Lipid peroxidase inhibitor
4123	-22.71	cp	BRD-A81772229	simvastatin	HMGCR inhibitor		HMGCR, CYP2C8, CYP3A4, CYP3A5, ITGB2	HMGCR inhibitor
4127	-22.81	cp	BRD-K99696746	fatostatin	SREBP inhibitor		SREBF1, SREBF2	SREBP inhibitor
4128	-22.84	cp	BRD-K05181084	NGB-2904	Dopamine receptor antagonist		DRD3	Dopamine receptor antagonist
4133	-22.87	cp	BRD-K10974103	diloxanide	Protein synthesis inhibitor			Protein synthesis inhibitor
4136	-22.95	cp	BRD-K27305650	LY-294002	MTOR inhibitor		MTOR, PIK3CD, PIK3CG, PIK3CA, PIK3CB, PLK1, PRKDC, AKT1, CHEK1, GSK3B, LCK, MAPK1, MAPK11, MAPK12, MAPK14, MAPK8, PDE2A, PRKCA, ROCK1, RPS6KB1, SGK1	MTOR inhibitor, PI3K inhibitor, DNA dependent protein kinase inhibitor, Phosphodiesterase inhibitor, PLK inhibitor
4137	-22.98	cp	BRD-A43940795	tetrahydropalmatine	Serotonin release inhibitor			Serotonin release inhibitor
4147	-23.09	cp	BRD-K19462402	buflomedil	Adrenergic receptor antagonist		CACNA1C	Adrenergic receptor antagonist, Calcium channel blocker
4150	-23.15	cp	BRD-A92177080	betamethasone	Glucocorticoid receptor agonist		NR3C1	Glucocorticoid receptor agonist
4152	-23.19	cp	BRD-K89274813	DMP-543	Acetylcholine release stimulant			Acetylcholine release stimulant
4157	-23.24	cp	BRD-K03642198	AY-9944	Hedgehog pathway modulator			Hedgehog pathway modulator
4161	-23.28	cp	BRD-K14696368	9-methyl-5H-6-thia-4,5-diaza-chrysene-6,6-dioxide	NFkB pathway inhibitor		RELA	NFkB pathway inhibitor
4166	-23.36	cp	BRD-K87573634	propylpyrazole	Estrogen receptor agonist		ESR1	Estrogen receptor agonist
4168	-23.41	cp	BRD-A31007383	SDZ-WAG-994	Adenosine receptor agonist		ADORA1	Adenosine receptor agonist
4182	-23.63	cp	BRD-A05352148	ipratropium	Acetylcholine receptor antagonist		CHRM1, CHRM2, CHRM3, CHRM4, CHRM5	Acetylcholine receptor antagonist
4190	-23.72	cp	BRD-K94512704	spiramide	Dopamine receptor antagonist		DRD2, HTR1A, HTR2A, HTR2B, HTR2C	Dopamine receptor antagonist, Serotonin receptor antagonist
4195	-23.79	cp	BRD-K99029477	prometon	Photosynthesis inhibitor			Photosynthesis inhibitor
4208	-23.99	cp	BRD-K63165456	norcyclobenzaprine	Adrenergic receptor agonist		HTR2A	Adrenergic receptor agonist, Serotonin receptor antagonist
4209	-24.01	cp	BRD-K46018455	bezafibrate	PPAR receptor agonist		PPARA, PPARD, PPARG, HSD11B1, LPL	PPAR receptor agonist
4210	-24.01	cp	BRD-A18917088	estradiol	Contraceptive agent		ESR1, ESR2, NR1I2, CYP2B6, CYP2C19, CYP2C8, CYP2E1, CYP3A5, CYP3A7, GPER1, KCNMA1	Contraceptive agent, Estrogen receptor agonist
4215	-24.14	cp	BRD-K97118047	4,5,6,7-tetrabromobenzotriazole	Casein kinase inhibitor		CSNK2A1, AKT1, CHEK1, CSNK2A2, CSNK2B, GSK3B, LCK, MAP2K1, MAPK1, MAPK11, MAPK12, MAPK14, MAPK8, PRKCA, ROCK1, RPS6KB1, SGK1	Casein kinase inhibitor
4223	-24.25	cp	BRD-A65550283	ginsenoside	Steroid hormone receptor agonist			Steroid hormone receptor agonist
4227	-24.32	cp	BRD-K91904471	SD-169	p38 MAPK inhibitor		MAPK14	p38 MAPK inhibitor
4231	-24.39	cp	BRD-K98684188	GSK-0660	PPAR receptor antagonist		PPARD	PPAR receptor antagonist
4238	-24.46	cp	BRD-K19416115	sitagliptin	Dipeptidyl peptidase inhibitor		DPP4, CYP2C8, FASLG, HMGCR, SLC22A8	Dipeptidyl peptidase inhibitor
4240	-24.5	cp	BRD-K76872913	benzanthrone	Aromatic hydrocarbon derivative			Aromatic hydrocarbon derivative
4241	-24.51	cp	BRD-K35430135	SR-59230A	Adrenergic receptor antagonist		ADRB3, ADRB1, ADRB2	Adrenergic receptor antagonist
4242	-24.52	cp	BRD-K66788707	fludarabine	DNA synthesis inhibitor		ADA, DCK, POLA1, RRM1, RRM2	DNA synthesis inhibitor, DNA repair enzyme inhibitor, Purine antagonist
4245	-24.61	cp	BRD-K28936863	ketotifen	Histamine receptor agonist		HRH1, PDE4A, PDE4B, PDE4C, PDE4D, PDE7A, PDE7B, PDE8A, PDE8B, PGD	Histamine receptor agonist, Histamine receptor ligand, Leukotriene receptor antagonist, Phosphodiesterase inhibitor
4248	-24.67	cp	BRD-A84481105	thioridazine	Dopamine receptor antagonist		DRD1, DRD2, HTR2A, ADRA1A, ADRA1B, CHRNA7, DRD5, HRH1, HTR1A, HTR2C, HTR6, HTR7, KCNH2, MALT1	Dopamine receptor antagonist
4249	-24.68	cp	BRD-K29313308	HDAC3-selective	HDAC inhibitor		HDAC3	HDAC inhibitor
4250	-24.69	cp	BRD-A10355991	norketamine	Glutamate receptor antagonist		CYP2B6, CYP2C19, CYP3A5, GRIN1	Glutamate receptor antagonist
4254	-24.76	cp	BRD-K96271548	coumaric-acid	Antioxidant			Antioxidant
4256	-24.76	cp	BRD-A09056319	alfuzosin	Adrenergic receptor antagonist		ADRA1A, ADRA1D, ADRA1B, KCNH2	Adrenergic receptor antagonist
4258	-24.8	cp	BRD-K51476772	ST-638	Tyrosine kinase inhibitor			Tyrosine kinase inhibitor
4263	-24.89	cp	BRD-A78377521	monastrol	Kinesin-like spindle protein inhibitor		KIF11	Kinesin-like spindle protein inhibitor
4265	-24.91	cp	BRD-K40887525	ritanserin	Serotonin receptor antagonist		HTR2A, HTR2C, HTR2B, ADRA1A, ADRA1B, ADRA1D, HTR1A, HTR1B, HTR1D, HTR5A, HTR6, HTR7	Serotonin receptor antagonist
4266	-24.93	cp	BRD-K06335600	tizanidine	Adrenergic receptor agonist		ADRA2A, ADRA2B, ADRA2C, CYP1A2, NISCH	Adrenergic receptor agonist
4271	-25.08	cp	BRD-K91696562	orantinib	FGFR inhibitor		PDGFRB, AURKA, AURKB, KDR, EGFR, FGFR1, FGFR2, PDGFRA, TBK1	FGFR inhibitor, VEGFR inhibitor, PDGFR receptor inhibitor
4272	-25.1	cp	BRD-K81225797	SCH-58261	Adenosine receptor antagonist		ADORA2A, ADORA1, ADORA2B, ADORA3	Adenosine receptor antagonist
4285	-25.35	cp	BRD-K16233984	eriochrome-black-t	Azo dye			Azo dye
4287	-25.38	cp	BRD-K11373525	ZD-7155	Angiotensin receptor antagonist		AGTR1	Angiotensin receptor antagonist
4288	-25.38	cp	BRD-K12762134	XAV-939	Tankyrase inhibitor		TNKS, TNKS2	Tankyrase inhibitor
4289	-25.41	cp	BRD-K04548931	pidorubicine	Topoisomerase inhibitor		TOP2A	Topoisomerase inhibitor
4291	-25.43	cp	BRD-K62929068	6-benzylaminopurine	Purinergic receptor activator			Purinergic receptor activator
4302	-25.57	cp	BRD-K27665173	D-64406	PDGFR receptor inhibitor		FLT3, PDGFRA, PDGFRB	PDGFR receptor inhibitor
4304	-25.59	cp	BRD-K37289225	clozapine	Dopamine receptor antagonist		DRD2, DRD4, ADRA1A, ADRA1B, CHRM1, DRD1, DRD3, HRH1, HRH4, HTR1A, HTR1B, HTR1D, HTR1E, HTR2A, HTR2C, HTR6, HTR7, ADRA1D, ADRA2A, ADRA2B, ADRA2C, CALY, CHRM2, CHRM3, CHRM4, CHRM5, CYP2C19, DRD5, HTR1F, HTR2B, HTR3A, HTR5A	Dopamine receptor antagonist, Serotonin receptor antagonist
4309	-25.64	cp	BRD-K71289571	zafirlukast	Leukotriene receptor antagonist		CYSLTR1, CYSLTR2	Leukotriene receptor antagonist
4311	-25.71	cp	BRD-K90976994	dehydrocholic-acid	Bile acid			Bile acid
4329	-26.03	cp	BRD-K62200014	anagrelide	Phosphodiesterase inhibitor		PDE3A	Phosphodiesterase inhibitor
4339	-26.23	cp	BRD-K16508793	diazepam	Benzodiazepine receptor agonist		GABRA1, GABRA2, GABRA3, GABRA5, ADRA1A, CYP2C19, GABRA4, GABRA6, GABRB1, GABRB2, GABRB3, GABRD, GABRE, GABRG1, GABRG2, GABRG3, GABRP, GABRQ, GABRR1, GABRR2, GABRR3, TSPO	Benzodiazepine receptor agonist
4349	-26.37	cp	BRD-K39520573	GW-5074	Leucine rich repeat kinase inhibitor		LRRK1, LRRK2, NTRK1, RAF1	Leucine rich repeat kinase inhibitor, RAF inhibitor
4350	-26.4	cp	BRD-K96740444	itopride	Dopamine receptor antagonist		DRD2, ACHE, CHRM3	Dopamine receptor antagonist
4352	-26.43	cp	BRD-K69650333	idarubicin	Topoisomerase inhibitor		TOP2A	Topoisomerase inhibitor
4356	-26.49	cp	BRD-K89839824	raltitrexed	Thymidylate synthase inhibitor		TYMS, FPGS	Thymidylate synthase inhibitor
4366	-26.64	cp	BRD-K72093121	vidarabine	Antiviral		ADCY5	Antiviral
4368	-26.67	cp	BRD-A64479082	quinidine	Sodium channel blocker		SCN5A, ABCB1, CYP2D6, KCNA5, KCNA7, KCNH1, KCNH2, KCNH5, KCNK1, KCNK6, SLC29A4	Sodium channel blocker
4371	-26.74	cp	BRD-A41250306	cyclopenthiazide	Thiazide diuretic			Thiazide diuretic
4372	-26.74	cp	BRD-K59058766	chlorprothixene	Dopamine receptor antagonist		DRD2, CHRM1, CHRM2, CHRM3, CHRM4, CHRM5, DRD1, DRD3, HRH1, HTR2A, HTR2B, HTR2C	Dopamine receptor antagonist
4376	-26.81	cp	BRD-K82484965	carmoxirole	Dopamine receptor agonist		DRD2	Dopamine receptor agonist
4378	-26.83	cp	BRD-K45861246	azaperone	Dopamine receptor antagonist		DRD2, DRD3	Dopamine receptor antagonist
4380	-26.9	cp	BRD-K99063460	didanosine	Nucleoside reverse transcriptase inhibitor		PNP	Nucleoside reverse transcriptase inhibitor
4381	-26.92	cp	BRD-K83508485	FK-888	Tachykinin antagonist		TACR1, TACR2	Tachykinin antagonist
4383	-26.96	cp	BRD-K25224017	pirenperone	Serotonin receptor antagonist		HTR2A, HTR7	Serotonin receptor antagonist
4391	-27.09	cp	BRD-K60160658	tiagabine	GABA uptake inhibitor		SLC6A1, CYP2C19	GABA uptake inhibitor
4398	-27.17	cp	BRD-A34806832	proscillaridin	ATPase inhibitor		ATP1A1	ATPase inhibitor
4399	-27.22	cp	BRD-K91336023	mesulergine	Dopamine receptor agonist		HTR2A, HTR2C, HTR7, HTR2B, HTR3A, HTR3B, HTR6	Dopamine receptor agonist
4405	-27.31	cp	BRD-A30590053	MR-16728	Acetylcholine release enhancer			Acetylcholine release enhancer, Acetylcholine release stimulant
4408	-27.35	cp	BRD-K85603128	resorcinol	Phosphodiesterase inhibitor		CA12, CA14, CA2, PTGS1	Phosphodiesterase inhibitor
4410	-27.42	cp	BRD-A58955223	sulforaphane	Antineoplastic		NFE2L2	Antineoplastic, Aryl hydrocarbon receptor antagonist
4411	-27.43	cp	BRD-K27450477	EHNA	Adenosine deaminase inhibitor		ADA, PDE2A, ADORA2A	Adenosine deaminase inhibitor
4413	-27.45	cp	BRD-K96527333	dehydroisoandosterone	GABA receptor modulator			GABA receptor modulator
4416	-27.47	cp	BRD-K96402602	farnesylthiotriazole	PPMTase inhibitor			PPMTase inhibitor
4418	-27.48	cp	BRD-K93618743	ipriflavone	Bone resorption inhibitor			Bone resorption inhibitor
4421	-27.53	cp	BRD-A67799922	phenoxybenzamine	Adrenergic receptor antagonist		ADRA2B, ADRA1A, ADRA1B, ADRA1D, ADRA2A, ADRA2C, ADRB2, CALM1	Adrenergic receptor antagonist
4422	-27.57	cp	BRD-K38615104	A-443644	AKT inhibitor		AKT1, AKT2, AKT3, CDC42BPB, GSK3B, PHKG1, PKIA, PRKACA	AKT inhibitor
4424	-27.61	cp	BRD-A95096829	PNU-96415E	Dopamine receptor antagonist			Dopamine receptor antagonist
4428	-27.7	cp	BRD-K28137194	loreclezole	GABA receptor agonist		GABRB2, GABRB3	GABA receptor agonist
4429	-27.72	cp	BRD-A76093993	cromakalim	Potassium channel activator		KCNJ8, ABCC9, KCNJ5	Potassium channel activator
4430	-27.72	cp	BRD-K89732114	trifluoperazine	Dopamine receptor antagonist		DRD2, ABCG2, ADRA1A, CALM1, CALY, CAMK2A, DRD4, HRH1, HTR2A, HTR2C, S100A4, SCN4A, SCN9A, TNNC1	Dopamine receptor antagonist
4434	-27.77	cp	BRD-K10136726	tosyllysyl-chloromethyl-ketone	Chymotrypsin inhibitor			Chymotrypsin inhibitor
4435	-27.8	cp	BRD-K76908866	CP-724714	EGFR inhibitor		ERBB2	EGFR inhibitor, Receptor tyrosine protein kinase inhibitor, Tyrosine kinase inhibitor
4438	-27.91	cp	BRD-K08996725	zolantidine	Histamine receptor antagonist			Histamine receptor antagonist
4439	-27.91	cp	BRD-K45117373	Y-26763	Potassium channel activator		ABCC9, KCNJ8	Potassium channel activator
4440	-27.99	cp	BRD-K70577657	H-9	PKA inhibitor		PRKACA	PKA inhibitor
4441	-27.99	cp	BRD-K98426715	tubacin	HDAC inhibitor		HDAC6	HDAC inhibitor
4454	-28.29	cp	BRD-K70327191	benzoxiquine	Anti-infective			Anti-infective
4457	-28.34	cp	BRD-K36627727	tamibarotene	Retinoid receptor agonist		RARA, RARB	Retinoid receptor agonist
4465	-28.46	cp	BRD-K54704028	BAY-36-7620	Glutamate receptor antagonist		GRM1	Glutamate receptor antagonist
4466	-28.46	cp	BRD-K32247306	primidone	GABA receptor antagonist		GABRA1, CHRNA4, CHRNA7, GABRA2, GABRA3, GABRA4, GABRA5, GABRA6, GABRB1, GABRB2, GABRB3, GABRD, GABRE, GABRG1, GABRG2, GABRG3, GABRP, GABRQ, GRIA2, GRIK2	GABA receptor antagonist
4473	-28.55	cp	BRD-K66412701	pazufloxacin	Topoisomerase inhibitor			Topoisomerase inhibitor
4485	-28.75	cp	BRD-A61470182	n-formylmethionylalanine	macrophage activator			macrophage activator
4486	-28.78	cp	BRD-A80383043	BRD-A80383043	Glutamate receptor agonist		GRM1, GRM2	Glutamate receptor agonist, Glutamate receptor antagonist
4490	-28.81	cp	BRD-K91699951	benzonatate	Local anesthetic		SCN5A	Local anesthetic
4495	-28.87	cp	BRD-K55703048	latrepirdine	Glutamate receptor antagonist		HTR6, GRIN2B, HRH1	Glutamate receptor antagonist
4496	-28.88	cp	BRD-K31912990	CGP-71683	Neuropeptide receptor antagonist		NPY5R	Neuropeptide receptor antagonist
4497	-28.89	cp	BRD-K88551539	CAY-10585	HIF modulator		HIF1A	HIF modulator
4502	-28.97	cp	BRD-K97158071	droperidol	Dopamine receptor antagonist		DRD2, ADRA1A	Dopamine receptor antagonist
4505	-29.05	cp	BRD-K80451230	zamifenacin	Acetylcholine receptor antagonist		CHRM3	Acetylcholine receptor antagonist
4507	-29.15	cp	BRD-K42573370	avrainvillamide-analog-2	nucleophosmin inhibitor		NPM1	nucleophosmin inhibitor
4510	-29.18	cp	BRD-K37618799	MRS-1220	Adenosine receptor antagonist		ADORA2B, ADORA3	Adenosine receptor antagonist
4515	-29.31	cp	BRD-K55044200	amoxicillin	Penicillin binding protein inhibitor		SLC15A1	Penicillin binding protein inhibitor
4523	-29.4	cp	BRD-K10961822	latanoprost	Prostanoid receptor agonist		PTGFR	Prostanoid receptor agonist
4531	-29.49	cp	BRD-K50938786	ropivacaine	Sodium channel blocker		SCN10A, SCN9A	Sodium channel blocker
4532	-29.5	cp	BRD-A68929948	DAPT-GSI-IX	Gamma secretase inhibitor			Gamma secretase inhibitor
4535	-29.54	cp	BRD-K10670311	sulfasalazine	Antirheumatic		PTGS1, PTGS2, ACAT1, ALOX5, CHUK, IKBKB, PLA2G1B, PPARG, SLC46A1, SLC7A11, TBXAS1	Antirheumatic, NFkB pathway inhibitor
4537	-29.56	cp	BRD-A17448384	beclometasone	Glucocorticoid receptor agonist		NR3C1, CYP3A5, GPR97, SERPINA6	Glucocorticoid receptor agonist
4538	-29.57	cp	BRD-K41996876	tyrphostin-1	EGFR inhibitor		EGFR	EGFR inhibitor
4540	-29.59	cp	BRD-A55946879	BW-B70C	Lipoxygenase inhibitor		ALOX5	Lipoxygenase inhibitor
4545	-29.62	cp	BRD-K08556791	ethoprop	Acetylcholinesterase inhibitor		ACHE	Acetylcholinesterase inhibitor
4548	-29.65	cp	BRD-K59597909	phenothiazine	Dopamine receptor antagonist			Dopamine receptor antagonist
4549	-29.65	cp	BRD-K93460210	lamotrigine	Serotonin receptor antagonist		SCN1A, SCN2A, SCN3A	Serotonin receptor antagonist, Sodium channel blocker
4550	-29.67	cp	BRD-K39462424	dexchlorpheniramine	Histamine receptor antagonist			Histamine receptor antagonist
4551	-29.69	cp	BRD-K50660797	epicatechin	Bacterial DNA gyrase inhibitor		FASN, APP, BACE1, SLC5A1	Bacterial DNA gyrase inhibitor, Cyclooxygenase inhibitor, DNA polymerase inhibitor
4552	-29.75	cp	BRD-K02283807	GR-32191	Thromboxane receptor antagonist		TBXA2R	Thromboxane receptor antagonist
4555	-29.77	cp	BRD-A06726973	dibutyrylcyclic-gmp	cGMP analog			cGMP analog
4557	-29.81	cp	BRD-K73838513	cinacalcet	Calcium channel activator		CASR	Calcium channel activator
4559	-29.82	cp	BRD-K09635314	M-3M3FBS	phospholipase activator		PLCB2, PLCB3, PLCD1, PLCG1, PLCG2	phospholipase activator
4561	-29.87	cp	BRD-K99107520	felbamate	Glutamate receptor antagonist		GRIN2A, GRIN2B, GRIN3A	Glutamate receptor antagonist
4568	-29.94	cp	BRD-A97479839	piperidolate	Acetylcholine receptor antagonist		CHRM1	Acetylcholine receptor antagonist
4571	-30.08	cp	BRD-K62056274	quipazine	Serotonin receptor agonist		HTR2A, HTR3A, HTR3B, HTR1A, HTR1D, HTR2B, HTR2C, HTR6, SLC6A4	Serotonin receptor agonist
4573	-30.12	cp	BRD-A00520476	otenzepad	Acetylcholine receptor antagonist			Acetylcholine receptor antagonist
4577	-30.17	cp	BRD-A47598013	citalopram	Serotonin reuptake inhibitor		SLC6A4, SLC6A2	Serotonin reuptake inhibitor
4578	-30.19	cp	BRD-A98283014	calmidazolium	Calcium channel blocker		ATP2B1, PDE1A	Calcium channel blocker, Calmodulin antagonist
4580	-30.26	cp	BRD-K66782112	BRD-K66782112	Histamine receptor antagonist		HRH2	Histamine receptor antagonist
4582	-30.29	cp	BRD-K14993104	bemegride	Chemoreceptor agonist		GABRA1	Chemoreceptor agonist
4585	-30.33	cp	BRD-K33583600	isoliquiritigenin	Guanylate cyclase activator		AKR1B1, HRH2, SIRT1	Guanylate cyclase activator
4589	-30.4	cp	BRD-K62996583	lidoflazine	Calcium channel blocker		SCN1A, SCN3A, SLC29A1	Calcium channel blocker
4591	-30.5	cp	BRD-K21450440	benzthiazide	Carbonic anhydrase inhibitor		CA2, CA1, CA12, CA4, CA9, SLC12A3	Carbonic anhydrase inhibitor
4592	-30.51	cp	BRD-K49657628	tyrphostin-AG-18	EGFR inhibitor		EGFR	EGFR inhibitor, Tyrosine kinase inhibitor
4596	-30.56	cp	BRD-K14965640	ibuprofen	Cyclooxygenase inhibitor		PTGS2, PTGS1, ASIC1, BCL2, CFTR, CYP2C8, FABP2, PLAT, PPARG, SLC5A8, THBD	Cyclooxygenase inhibitor
4598	-30.6	cp	BRD-K76723084	isotretinoin	Retinoid receptor agonist		CYP2B6, CYP2C19, CYP2C8, CYP3A5, CYP3A7, NR2C2, PPARD, RARA, RARB, RARG, RORB, RORC	Retinoid receptor agonist
4599	-30.62	cp	BRD-A97104540	fenoterol	Adrenergic receptor agonist		ADRB2, ADRB1, ADRB3	Adrenergic receptor agonist
4600	-30.62	cp	BRD-K79145749	dibenzepin	Norepinephrine reuptake inhibitor			Norepinephrine reuptake inhibitor
4602	-30.66	cp	BRD-K97399794	quercetin	Polar auxin transport inhibitor		PIK3CG, AKR1B1, ATP5A1, ATP5B, ATP5C1, CYP2C8, EGFR, GAA, HCK, HIBCH, MAOA, PIM1, PTPN1, SCN5A, SIRT1, STK17B, UGT3A1, XDH	Polar auxin transport inhibitor
4608	-30.73	cp	BRD-A08187463	racecadotril	Enkephalinase inhibitor		MME	Enkephalinase inhibitor
4609	-30.79	cp	BRD-K77677632	SB-200646	Serotonin receptor antagonist		HTR2B, HTR2C	Serotonin receptor antagonist
4613	-30.88	cp	BRD-A64125466	dehydrocholic-acid	choleretic agent			choleretic agent
4615	-30.92	cp	BRD-K29950728	clomifene	Estrogen receptor antagonist		ESR1, AR	Estrogen receptor antagonist
4622	-31.02	cp	BRD-K56450366	NSC-94258	Antineoplastic		AKR1B1, CYP19A1, HSD17B1	Antineoplastic
4625	-31.05	cp	BRD-K84996949	sinensetin	Cyclooxygenase inhibitor			Cyclooxygenase inhibitor
4628	-31.08	cp	BRD-K33308633	INCA-6	Calcineurin inhibitor		NFATC1	Calcineurin inhibitor
4631	-31.11	cp	BRD-K15933101	ropinirole	Dopamine receptor agonist		DRD2, DRD3, ADRA2A, ADRA2B, ADRA2C, DRD1, DRD4, DRD5, HTR1A, HTR1B, HTR1D, HTR2A, HTR2B, HTR2C	Dopamine receptor agonist
4632	-31.11	cp	BRD-K68143200	SA-792541	CDC inhibitor		CASP3, CDC25A, CDC25B	CDC inhibitor
4634	-31.16	cp	BRD-K52721684	PCO-400	Potassium channel activator		ABCC9, KCNJ8	Potassium channel activator
4635	-31.16	cp	BRD-K11742128	triprolidine	Histamine receptor antagonist		HRH1	Histamine receptor antagonist
4637	-31.19	cp	BRD-K75478907	GS-39783	GABA receptor modulator		GABBR1	GABA receptor modulator
4643	-31.25	cp	BRD-A49160188	donepezil	Acetylcholinesterase inhibitor		ACHE, HTR2A	Acetylcholinesterase inhibitor
4649	-31.33	cp	BRD-K64157027	ZD-2079	Adrenergic receptor agonist		ADRB3	Adrenergic receptor agonist
4654	-31.4	cp	BRD-K26429091	J-104129	Acetylcholine receptor antagonist		CHRM3	Acetylcholine receptor antagonist
4655	-31.4	cp	BRD-A17411484	carprofen	Cyclooxygenase inhibitor		PTGS2, PTGS1	Cyclooxygenase inhibitor
4656	-31.41	cp	BRD-K34608650	BRD-K34608650	Cannabinoid receptor agonist		CNR2	Cannabinoid receptor agonist
4657	-31.42	cp	BRD-K32526544	DCEBIO	Potassium channel activator		KCNN2, KCNN3, KCNN4	Potassium channel activator
4662	-31.58	cp	BRD-K82561139	ricinine	Casein kinase inhibitor			Casein kinase inhibitor
4667	-31.68	cp	BRD-A56987319	SQ-22536	Adenylyl cyclase inhibitor		ADCY1, ADCY5	Adenylyl cyclase inhibitor
4673	-31.76	cp	BRD-K17110974	aristolochic-acid	Phospholipase inhibitor			Phospholipase inhibitor
4674	-31.77	cp	BRD-K21806131	tegaserod	Serotonin receptor partial agonist		HTR4, HTR2B, HTR2A, HTR2C	Serotonin receptor partial agonist
4678	-31.79	cp	BRD-K74236984	UNC-0321	Histone lysine methyltransferase inhibitor		EHMT2	Histone lysine methyltransferase inhibitor
4682	-31.82	cp	BRD-K80778372	RO-19-4605	GABA benzodiazepine site receptor inverse agonist		GABRA1, GABRA2, GABRA3, GABRA5	GABA benzodiazepine site receptor inverse agonist
4684	-31.85	cp	BRD-K63430059	methoxsalen	DNA synthesis inhibitor		ACHE, CYP1A2	DNA synthesis inhibitor
4685	-31.87	cp	BRD-A73859745	glycodeoxycholic-acid	Apoptosis stimulant			Apoptosis stimulant
4687	-31.89	cp	BRD-K64402243	ivachtin	Caspase inhibitor		CASP3	Caspase inhibitor
4690	-31.91	cp	BRD-K37991163	paroxetine	Selective serotonin reuptake inhibitor (SSRI)		SLC6A4, CHRM1, CHRM2, CHRM3, CHRM4, CHRM5, HTR2A, SLC6A2	Selective serotonin reuptake inhibitor (SSRI)
4691	-31.96	cp	BRD-K47761761	PD-168077	Dopamine receptor agonist		DRD2, DRD4	Dopamine receptor agonist
4700	-32.04	cp	BRD-M64432851	sunitinib	FLT3 inhibitor		FLT3, KDR, KIT, FLT4, FLT1, PDGFRA, PDGFRB, RET, CSF1R, FGFR1	FLT3 inhibitor, KIT inhibitor, PDGFR receptor inhibitor, RET tyrosine kinase inhibitor, VEGFR inhibitor
4706	-32.2	cp	BRD-K66896231	BRD-K66896231	Acetylcholinesterase inhibitor		ACHE	Acetylcholinesterase inhibitor
4707	-32.2	cp	BRD-K68065987	MK-2206	AKT inhibitor		AKT1, AKT2, AKT3	AKT inhibitor
4709	-32.21	cp	BRD-K00673382	famotidine	Histamine receptor antagonist		HRH2	Histamine receptor antagonist
4714	-32.35	cp	BRD-K18135438	chenodeoxycholic-acid	11-beta-HSD1 inhibitor		HSD11B1, NR1H4	11-beta-HSD1 inhibitor, FXR agonist
4715	-32.36	cp	BRD-A08877921	cephalotaxine	Protein synthesis inhibitor			Protein synthesis inhibitor
4723	-32.44	cp	BRD-A09467419	mebeverine	Acetylcholine receptor antagonist		CHRM1, CHRM2, CHRM3, CHRM4	Acetylcholine receptor antagonist
4726	-32.47	cp	BRD-A80574334	oxalomalic-acid	Isocitrate dehydrogenase inhibitor		ACO1, IDH1	Isocitrate dehydrogenase inhibitor
4743	-32.71	cp	BRD-K10860596	granisetron	Serotonin receptor antagonist		HTR3A, CYP3A5	Serotonin receptor antagonist
4750	-32.84	cp	BRD-K62792802	LY-83583	Guanylyl cyclase inhibitor		GUCY1A2	Guanylyl cyclase inhibitor
4751	-32.85	cp	BRD-K73991644	isoquercetin	Aldose reductase inhibitor		AKR1B1, ACE	Aldose reductase inhibitor
4753	-32.85	cp	BRD-K67261995	adipiodone	Contrast agent		ALB	Contrast agent
4757	-32.91	cp	BRD-K81916719	triclabendazole	Microtubule inhibitor		DNMT1	Microtubule inhibitor
4758	-32.94	cp	BRD-K93645900	tadalafil	Phosphodiesterase inhibitor		PDE5A, PDE11A	Phosphodiesterase inhibitor
4761	-33	cp	BRD-K33312228	halometasone	Glucocorticoid receptor agonist		NR3C1	Glucocorticoid receptor agonist
4765	-33.02	cp	BRD-K04877770	FTase-inhibitor-B581	Farnesyltransferase inhibitor			Farnesyltransferase inhibitor
4776	-33.2	cp	BRD-K92778217	mefenamic-acid	Cyclooxygenase inhibitor		PTGS2, PTGS1, KCNQ1, TRPM3	Cyclooxygenase inhibitor
4777	-33.22	cp	BRD-K14282469	LY-165163	Serotonin receptor antagonist		HTR1A, HTR1D	Serotonin receptor antagonist
4778	-33.23	cp	BRD-K00184207	GR-206	Aryl hydrocarbon receptor ligand			Aryl hydrocarbon receptor ligand
4779	-33.24	cp	BRD-K81376179	TCS-359	FLT3 inhibitor		FLT3	FLT3 inhibitor
4788	-33.39	cp	BRD-K47943470	tyrphostin-51	EGFR inhibitor			EGFR inhibitor
4792	-33.44	cp	BRD-A24228527	ofloxacin	Bacterial DNA gyrase inhibitor		TOP2A	Bacterial DNA gyrase inhibitor
4793	-33.45	cp	BRD-K14643723	4-(2-Amino-ethyl)-benzenesulfonamide	carbonic anhydrase inhibitor		CA2, CA1, CA9, CA12, CA14, CA4	carbonic anhydrase inhibitor
4794	-33.46	cp	BRD-K20482099	rutin	Antioxidant		AKR1C3, AKR1B1, F10	Antioxidant, Capillary stabilizing agent, Nitric oxide scavenger
4795	-33.5	cp	BRD-K56001384	antimycin-a	ATP synthase inhibitor		CYCS	ATP synthase inhibitor
4797	-33.53	cp	BRD-K82381502	acetylcholine	Acetylcholine receptor agonist		ACHE, CHRM1, CHRM2, CHRM3, CHRM4, CHRM5, CHRNA2	Acetylcholine receptor agonist
4799	-33.55	cp	BRD-K85119730	tolbutamide	ATP channel blocker		ABCC8, CYP2B6, CYP2C19, CYP2C8, KCNJ1, KCNJ11, KCNJ8	ATP channel blocker
4801	-33.58	cp	BRD-K85266041	DNQX	Glutamate receptor antagonist		GRIA1, GRIA2, GRIK1, GRIN1, GRIN2A, GRIN2B	Glutamate receptor antagonist
4809	-33.71	cp	BRD-A51393488	noscapine	Bradykinin receptor antagonist		BDKRB2, SIGMAR1	Bradykinin receptor antagonist, Tubulin inhibitor
4814	-33.85	cp	BRD-K02953697	naringin	Cytochrome P450 inhibitor		SLCO1A2	Cytochrome P450 inhibitor
4816	-33.9	cp	BRD-K81128206	edrophonium	Acetylcholinesterase inhibitor		ACHE, BCHE	Acetylcholinesterase inhibitor
4819	-34.02	cp	BRD-K47278471	diphenhydramine	Histamine receptor antagonist		HRH1	Histamine receptor antagonist
4825	-34.12	cp	BRD-K32710582	EI-247	IGF-1 inhibitor		INSR	IGF-1 inhibitor
4827	-34.15	cp	BRD-K36529613	PU-H71	HSP inhibitor		HSP90AA1	HSP inhibitor
4831	-34.19	cp	BRD-A02990301	lofexidine	Adrenergic receptor agonist		ADRA2A	Adrenergic receptor agonist
4832	-34.23	cp	BRD-K16195444	oxymetazoline	Adrenergic receptor agonist		ADRA1A, ADRA2A, ADRA1B, ADRA1D, ADRA2B, ADRA2C, CYP2C19, HTR1B, HTR1D, HTR2C	Adrenergic receptor agonist
4833	-34.23	cp	BRD-A35912562	pregnenolone	Glutamate receptor modulator		CYP17A1, PGR, SULT2B1	Glutamate receptor modulator, Acetylcholine release enhancer, Dopamine release enhancer, GABA receptor negative allosteric modulator
4838	-34.36	cp	BRD-A29644307	nomifensine	Dopamine uptake inhibitor		SLC6A2, SLC6A3, DRD2, MAOA, MAOB, MPO	Dopamine uptake inhibitor, Noradrenaline uptake inhibitor
4845	-34.46	cp	BRD-K34508425	KUC103898N	-666			-666
4847	-34.47	cp	BRD-K87919739	tyrphostin-AG-825	Receptor tyrosine protein kinase inhibitor		ERBB2	Receptor tyrosine protein kinase inhibitor
4851	-34.54	cp	BRD-K30697463	desoximetasone	Glucocorticoid receptor agonist		NR3C1, PLA2G1B	Glucocorticoid receptor agonist
4854	-34.55	cp	BRD-K30570479	VU-0400195-3	Glutamate receptor modulator		GRM4	Glutamate receptor modulator
4859	-34.61	cp	BRD-K53570330	carbofuran	Cholinesterase inhibitor			Cholinesterase inhibitor
4860	-34.61	cp	BRD-A52588987	SKF-83566	Dopamine receptor antagonist		DRD1, DRD5	Dopamine receptor antagonist
4866	-34.68	cp	BRD-K00675675	CL-82198	Metalloproteinase inhibitor		MMP13	Metalloproteinase inhibitor
4868	-34.69	cp	BRD-K49519092	immethridine	Histamine receptor agonist		HRH3	Histamine receptor agonist
4873	-34.71	cp	BRD-K89687904	PKCbeta-inhibitor	PKC inhibitor		PRKCB	PKC inhibitor
4874	-34.72	cp	BRD-K52172416	anastrozole	Aromatase inhibitor		CYP19A1	Aromatase inhibitor
4875	-34.72	cp	BRD-K24994810	androstenol	GABA receptor modulator		NR1I3	GABA receptor modulator
4880	-34.85	cp	BRD-K74141488	naftifine	Fungal squalene epoxidase inhibitor		SQLE	Fungal squalene epoxidase inhibitor
4885	-34.95	cp	BRD-K13544237	r(-)-propylnorapomorphine	Dopamine receptor agonist		DRD2, DRD1, DRD3	Dopamine receptor agonist, TRPA1 modulator
4887	-34.99	cp	BRD-K09132007	D-4476	TGF beta receptor inhibitor		CSNK1A1, CSNK1D, TGFB1	TGF beta receptor inhibitor
4889	-35.07	cp	BRD-A39415247	norethisterone	Progesterone receptor agonist		PGR	Progesterone receptor agonist
4894	-35.12	cp	BRD-K59273480	propentofylline	Adenosine reuptake inhibitor		ACHE	Adenosine reuptake inhibitor, Phosphodiesterase inhibitor
4895	-35.15	cp	BRD-A65440446	cimaterol	Adrenergic receptor agonist			Adrenergic receptor agonist
4899	-35.21	cp	BRD-A41112154	oleanolic-acid	G protein-coupled receptor agonist			G protein-coupled receptor agonist
4901	-35.22	cp	BRD-K08619838	tremorine	Acetylcholine receptor agonist			Acetylcholine receptor agonist
4910	-35.33	cp	BRD-A80638690	floxuridine	DNA synthesis inhibitor		TYMS	DNA synthesis inhibitor
4911	-35.35	cp	BRD-A31575449	CGP-20712	Adrenergic receptor antagonist		ADRB1, ADRB3	Adrenergic receptor antagonist
4913	-35.39	cp	BRD-K41160163	fenobam	Glutamate receptor antagonist		GRM5	Glutamate receptor antagonist
4916	-35.49	cp	BRD-K15588452	R-96544	Serotonin receptor antagonist		HTR2A	Serotonin receptor antagonist
4919	-35.56	cp	BRD-A80928489	1-monopalmitin	P-glycoprotein inhibitor		ABCB1	P-glycoprotein inhibitor
4921	-35.62	cp	BRD-K69556541	ryanodine	Calcium channel blocker		RYR1, RYR2, RYR3	Calcium channel blocker
4928	-35.77	cp	BRD-K40578143	GR-79236	Adenosine receptor agonist		ADORA1, ADORA2A	Adenosine receptor agonist
4933	-35.86	cp	BRD-A01145011	zebularine	DNA methyltransferase inhibitor		CDA, DNMT1	DNA methyltransferase inhibitor
4940	-36.01	cp	BRD-A01643550	prednisolone	Glucocorticoid receptor agonist		NR3C1, NR3C2, SERPINA6	Glucocorticoid receptor agonist
4944	-36.04	cp	BRD-K71731651	PNU-120596	Acetylcholine receptor agonist		CHRNA7	Acetylcholine receptor agonist
4950	-36.19	cp	BRD-A38747044	KU-14R	Imidazoline receptor ligand			Imidazoline receptor ligand, Putative I3 antagonist
4957	-36.25	cp	BRD-K75641298	metoclopramide	Dopamine receptor antagonist		DRD2, HTR3A, HTR4, CHRM1, HTR3B	Dopamine receptor antagonist, Serotonin receptor antagonist
4960	-36.28	cp	BRD-K61480498	epoxycholesterol	LXR agonist		NR1H2, NR1H3	LXR agonist
4965	-36.32	cp	BRD-K08806317	timolol	Adrenergic receptor antagonist		ADRB2, ADRB1	Adrenergic receptor antagonist
4968	-36.39	cp	BRD-K02404261	caffeine	Adenosine receptor antagonist		ADORA1, ADORA2A, ADORA2B, ATM, ITPR1, RYR1, ADORA3, ATR, ITPR2, ITPR3, PDE10A, PDE11A, PDE1A, PDE1B, PDE1C, PDE2A, PDE3A, PDE3B, PDE4A, PDE4B, PDE4C, PDE4D, PDE5A, PDE6A, PDE6B, PDE6C, PDE7A, PDE7B, PDE8A, PDE8B, PDE9A, PIK3CA, PIK3CB, PIK3CD, PRKDC, RYR2, RYR3	Adenosine receptor antagonist, Diuretic, Phosphodiesterase inhibitor
4970	-36.49	cp	BRD-K68332390	ponalrestat	Aldose reductase inhibitor		AKR1B1	Aldose reductase inhibitor
4974	-36.56	cp	BRD-K73391359	quinisocaine	Local anesthetic			Local anesthetic
4983	-36.68	cp	BRD-K79116891	proxymetacaine	Sodium channel blocker		SCN10A, SCN5A, SCN9A	Sodium channel blocker
4984	-36.7	cp	BRD-K12219985	glipizide	Sulfonylurea		ABCC8, KCNJ10, KCNJ11, PPARG	Sulfonylurea
4987	-36.76	cp	BRD-K88741031	methyl-2,5-dihydroxycinnamate	EGFR inhibitor		EGFR	EGFR inhibitor, Tyrosine kinase inhibitor
4995	-36.92	cp	BRD-A41722204	sulmazole	Adenosine receptor antagonist			Adenosine receptor antagonist
4998	-36.93	cp	BRD-A01320529	salmeterol	Adrenergic receptor agonist		ADRB2	Adrenergic receptor agonist
5004	-36.99	cp	BRD-A75478957	PD-166793	Metalloproteinase inhibitor		MMP13, MMP2, MMP3	Metalloproteinase inhibitor, Collagenase inhibitor
5006	-37.01	cp	BRD-K46137903	prednicarbate	Phospholipase activator		NR3C1, PLA2G1B	Phospholipase activator
5007	-37.03	cp	BRD-K60770992	pergolide	Dopamine receptor agonist		DRD1, DRD2, ADRA2A, ADRA2B, ADRA2C, DRD3, DRD4, DRD5, HTR1A, HTR1B, HTR1D, HTR2A, HTR2B, HTR2C, ADRA1A, ADRA1B, ADRA1D, KCNA5	Dopamine receptor agonist
5010	-37.13	cp	BRD-A66927094	nemonapride	Dopamine receptor antagonist		DRD2, DRD3, DRD4	Dopamine receptor antagonist
5013	-37.19	cp	BRD-A48809242	IB-MECA	Adenosine receptor agonist		ADORA3, ADORA1, ADORA2A, ADORA2B	Adenosine receptor agonist
5015	-37.24	cp	BRD-K44779798	miglitol	Glucosidase inhibitor		GAA, MGAM, GANAB, GANC, SLC5A4	Glucosidase inhibitor
5017	-37.28	cp	BRD-A83695761	chromanol	Potassium channel blocker			Potassium channel blocker
5020	-37.34	cp	BRD-K54472332	elvitegravir	HIV integrase inhibitor			HIV integrase inhibitor
5021	-37.36	cp	BRD-K29668683	BD-1063	Sigma receptor antagonist		SIGMAR1	Sigma receptor antagonist
5025	-37.49	cp	BRD-K48722258	dilazep	Adenosine reuptake inhibitor		SLC29A1, CACNA1C	Adenosine reuptake inhibitor
5026	-37.5	cp	BRD-K73397362	purmorphamine	Smoothened receptor agonist		SMO, DHH, IHH, PTCH1	Smoothened receptor agonist
5027	-37.51	cp	BRD-A81177136	KN-62	Calcium-calmodulin dependent protein kinase inhibitor		AKT1, CAMK2A, CHEK1, LCK, MAPK1, MAPK11, MAPK12, MAPK14, MAPK8, P2RX7, PRKCA, ROCK1, RPS6KB1, SGK1	Calcium-calmodulin dependent protein kinase inhibitor, Purinergic receptor antagonist
5037	-37.68	cp	BRD-K47631482	bromhexine	Mucolytic agent			Mucolytic agent
5038	-37.72	cp	BRD-K31987754	oleylethanolamide	Cannabinoid receptor agonist		GPR119, CNR1, GPR55, KCND3, PPARA	Cannabinoid receptor agonist, Potassium channel blocker, Glucose dependent insulinotropic receptor agonist
5044	-37.83	cp	BRD-K37691127	hinokitiol	Tyrosinase inhibitor		TYR	Tyrosinase inhibitor
5048	-37.93	cp	BRD-K76568384	PHTPP	Estrogen receptor antagonist		ESR2	Estrogen receptor antagonist
5051	-37.99	cp	BRD-K62959606	sphingosine	Ceramidase inhibitor		GLTP, PVR, TRPM3	Ceramidase inhibitor
5059	-38.18	cp	BRD-K68095457	palmitoylethanolamide	Cannabinoid receptor agonist		CNR2, GPR119, GPR55	Cannabinoid receptor agonist
[truncated: 1,076 more rows]

## Sheet: BTG1
Rank	Score	Type	ID	Name	Description	CMap Class	Target	MOA
[truncated: 2,429 more rows]

[truncated: 3 more sheets: BTG2, BTG3, BTG4]
